# Supplementary material for: Dietary flavonoids of Spanish youth: intakes, sources, and association with the Mediterranean diet
Source: PeerJ. 2017 May 17;5:e3304. doi: 10.7717/peerj.3304 (PMC5437861; doi:10.7717/peerj.3304)
Supplement: Supplemental Information 1 [file peerj-05-3304-s001.xlsx]

## Sheet: Bawaked_DB Flavonoids _ data1
PERSONA	Age_group	sex	age	postal code	province	Size	regions	Age b y group	Age in years	flavonols_old	flavones_old	flava_nones_old	flavan3ols_old	antho_cyadinins_old	isoflavones_old	total_flavonoids_old	C100	C101	C102	C103	C104	C105	C106	C107	C108	C109	C110	C111	C112	C113	C114	C115	C116	C117	C118	C119	C120	C121	C122	C123	C124	C125	C126	C127	C128	C129	C130	C131	C132
14060	1	1	2.74795	206	13	1	1	1	2	1.5	0	0	0	0	0	1.5	0	0	0	36	0	0	0	0	0	0	0	700	0	0	0	0	0	0	0	0	0	0	0	0	0	0	0	0	0	0	0	0	0
16094	1	2	1.33699	53	6	2	1	1	#NULL!	0	0.015	0	0	0	0	0.015	0	0	0	0	0	0	0	0	0	0	0	0	0	100	0	0	0	0	0	0	0	0	0	0	0	0	0	0	0	0	0	0	0
39084	1	1	4	85	35	4	6	1	4	1.1055	0	0	15.5465	0	0	16.652	0	0	0	0	0	0	0	0	0	0	0	200	0	0	0	0	0	0	0	0	0	0	0	0	0	0	0	0	0	0	0	125	0
88021	1	2	2.88767	543	46	1	5	1	2	0.6066	0.2295	0	16.7958	0	0	17.6319	0	0	0	0	0	0	0	0	0	0	0	740	0	0	0	0	0	0	0	0	0	0	0	0	0	0	0	0	0	0	0	0	0
17030	1	1	4.06575	54	13	2	1	1	4	0.6066	0.0075	0	16.7958	0	0	17.4099	0	0	0	0	0	0	0	0	0	0	0	600	0	0	0	0	0	0	0	0	0	0	0	0	0	0	0	0	0	0	0	0	0
24028	1	2	4.51781	60	23	2	4	1	4	5.4799	0.531	0	0	0	0	6.0109	0	0	0	0	0	0	0	0	0	0	0	0	0	0	0	0	0	0	0	0	0	0	0	0	0	0	0	0	20	0	0	0	0
2014	1	2	4.41918	62	33	2	3	1	4	0.45	0.012	0	0	0	0	0.462	0	0	0	0	0	0	0	0	0	0	0	250	0	0	0	0	0	0	0	240	0	0	0	0	0	0	30	0	0	0	0	0	0
3002	1	2	3.06301	44	39	1	3	1	3	0.1685	0	0	4.6655	0	0	4.834	0	0	0	0	0	0	0	0	0	0	0	200	0	0	0	0	0	0	0	0	0	0	0	0	0	0	0	0	0	0	0	125	0
3014	1	1	5.13151	44	39	1	3	1	5	0.337	0	0	9.331	0	0	9.668	0	0	0	0	0	0	0	0	0	0	0	400	0	0	0	0	0	0	0	0	0	0	0	0	0	0	0	0	0	0	0	0	0
3035	1	1	4.80548	44	39	1	3	1	4	0.882	0.505	0	11.916	0	0	13.303	0	0	0	0	0	0	0	0	0	0	0	500	0	0	0	0	0	0	0	0	0	0	0	0	0	0	0	0	0	0	0	0	0
3122	1	2	4.83836	73	39	3	3	1	4	0.1685	0.0105	0	4.6655	0	0	4.8445	0	0	0	0	0	0	0	0	0	250	0	0	0	0	0	0	0	0	0	0	0	0	0	0	0	30	0	0	10	0	0	0	0
3146	1	2	3.66575	44	39	1	3	1	3	1.613	0.2055	0	3.675	0	0	5.4935	0	0	0	0	0	0	0	0	0	0	0	550	0	0	0	0	0	0	0	0	0	0	0	0	0	0	0	0	0	0	0	250	0
3147	1	1	3.07397	44	39	1	3	1	3	0	0	0	0	0	0	0	0	0	0	125	0	0	0	0	0	0	0	500	0	0	0	0	0	0	0	0	0	0	0	0	0	0	0	0	0	0	0	0	0
3188	1	2	5.8137	117	39	1	3	1	5	1.3685	0	0	12.3535	0	0	13.722	0	0	0	0	0	0	0	0	0	0	0	500	0	0	0	0	0	0	0	0	0	0	0	0	0	0	0	0	0	0	0	0	0
3196	1	2	3.5863	117	39	1	3	1	3	0	0.0785	0	0	0	0	0.0785	0	0	0	0	0	0	0	0	0	0	0	500	0	0	0	0	0	0	0	0	0	0	0	0	30	0	0	0	0	0	0	0	0
5028	1	1	3.27945	83	48	4	3	1	3	8.48	0.3335	0	8.1292	0	0	16.9427	0	0	0	0	0	0	0	0	0	0	0	600	0	0	0	0	0	0	0	0	0	0	0	0	0	0	0	0	0	0	0	125	0
5030	1	2	3.89041	83	48	4	3	1	3	0.7685	0.0075	0	4.6655	0	0	5.4415	0	0	0	0	0	0	0	0	0	450	0	0	0	0	0	0	0	0	0	0	0	0	0	0	0	0	0	0	0	0	0	0	0
5036	1	2	2.25753	83	48	4	3	1	2	0	0.018	0	0	0	0	0.018	0	0	0	0	0	0	0	0	0	0	0	375	0	0	0	0	0	0	0	0	0	0	0	0	0	0	0	0	0	0	0	0	0
5205	1	1	5.90959	514	20	3	3	1	5	3.745	0.11	0	10.8035	0	0	14.6585	0	0	0	0	0	0	0	0	0	0	0	200	0	0	0	0	0	0	120	0	0	0	0	0	0	0	0	0	0	0	0	0	0
11002	1	2	5.88767	16	49	1	1	1	5	1.6685	0	0	13.4145	0	0	15.083	0	0	0	0	0	0	0	0	0	0	0	300	0	0	0	0	0	0	0	0	0	0	0	0	0	0	0	0	0	0	0	0	0
11028	1	1	2.43288	69	47	3	1	1	2	1.1544	0.0375	0	11.1972	0	0	12.3891	0	0	0	0	0	0	0	0	0	0	0	450	0	0	0	0	0	0	0	0	0	0	0	0	0	0	0	0	0	0	0	0	0
11067	1	1	3	69	47	3	1	1	3	0	0.015	0	0	0	0	0.015	0	0	0	0	0	0	0	0	0	0	0	425	0	0	0	0	0	0	60	0	0	0	0	0	0	0	0	0	20	0	0	0	0
11075	1	2	5	69	47	3	1	1	5	4.17246	0.3095	0.098	0.0014	0.056	0	4.63736	0	0	0	0	0	0	0	0	0	0	0	650	0	0	0	0	0	0	0	0	0	0	0	0	0	45	0	0	0	0	0	0	0
13051	1	2	2.92055	101	2	1	1	1	2	2.838	0	0	15.7545	0	0	18.5925	0	0	0	0	0	0	0	0	0	550	0	0	0	0	0	0	0	0	0	0	0	0	0	0	0	0	0	0	0	0	0	0	0
14013	1	2	5.94247	204	13	1	1	1	5	0.842538	0.459	0.084	1.395	0	0	2.78054	0	0	0	0	0	0	0	0	0	0	0	0	0	0	0	0	0	0	0	0	0	0	0	0	0	0	0	0	0	0	0	0	0
17002	1	1	3.41096	78	28	4	1	1	3	0	0	11.3815	0	0	0	11.3815	0	0	0	0	0	0	0	0	0	0	0	600	0	0	0	0	0	0	0	0	0	0	0	0	0	0	0	0	0	0	0	125	0
17025	1	2	4.63014	54	13	2	1	1	4	0.0498	0.2295	0	0.0561	0.0369	0	0.3723	0	0	0	0	0	0	0	0	0	0	0	200	0	0	0	0	0	0	0	0	0	0	0	0	0	0	0	0	45	0	0	125	0
17043	1	2	3.01918	54	13	2	1	1	3	0.823	0.0225	0	8.108	0	0	8.9535	0	0	0	0	0	0	0	0	0	0	0	300	0	0	0	0	0	0	0	0	0	0	0	0	0	0	0	0	0	0	0	0	0
17051	1	2	4.75616	54	13	2	1	1	4	0	0.0045	0	0	0	0	0.0045	0	0	0	0	0	50	0	0	0	0	0	0	0	0	0	0	0	0	0	0	0	0	0	0	0	0	0	0	0	0	0	0	0
17071	1	1	4.98904	54	13	2	1	1	4	0.4044	0.0075	0	11.1972	0	0	11.6091	0	0	0	0	0	0	0	0	0	0	0	400	0	0	0	0	0	0	0	0	0	0	0	0	0	0	0	0	0	0	0	0	0
17080	1	2	2.85753	54	13	2	1	1	2	0	0	0	0.0375	0	0	0.0375	0	0	0	0	0	0	0	0	0	0	0	400	0	0	0	0	0	0	0	0	0	0	0	0	0	0	0	0	0	0	0	0	0
17103	1	2	4.98904	54	13	2	1	1	4	0.2696	0	0	7.4648	0	0	7.7344	0	0	0	0	0	0	0	0	0	0	0	200	0	0	0	0	0	0	0	0	0	0	0	0	0	0	0	0	0	0	0	0	0
20017	1	2	5.08493	141	29	2	4	1	5	0.899	0	0	0	0	0	0.899	200	0	0	0	0	0	0	0	0	0	0	200	0	0	0	0	0	0	60	0	0	0	0	0	0	0	0	0	0	0	0	0	0
22007	1	1	4.18356	72	23	3	4	1	4	0	0	0	0	0	0	0	0	0	0	0	0	0	0	0	0	0	0	500	0	0	0	0	0	0	0	0	0	0	0	0	0	0	0	0	0	0	0	0	0
22078	1	1	4.82466	105	4	2	4	1	4	1.289	0	0	2.835	0	0	4.124	0	0	0	125	0	0	0	0	0	0	0	700	0	0	0	0	0	0	0	0	0	0	0	0	0	0	0	0	10	0	0	0	0
24002	1	1	4.8274	60	23	2	4	1	4	0	0	0	0	0	0	0	0	0	0	0	0	150	0	0	0	0	0	300	0	0	0	0	0	0	60	0	0	0	0	0	0	0	0	0	0	0	0	0	0
24021	1	1	2.74521	60	23	2	4	1	2	2.97844	0.729	0.147	13.786	0	0	17.6404	0	0	0	0	0	0	0	0	0	0	0	300	0	0	0	0	0	0	0	0	0	0	0	0	0	0	0	0	0	0	0	0	0
29003	1	2	5.29863	58	8	2	2	1	5	4.074	0.2955	14.008	1.4725	0	0	19.85	0	0	0	0	0	0	0	0	0	0	0	0	0	0	0	0	0	0	0	0	0	0	0	0	0	60	0	0	0	0	0	0	0
29033	1	2	3.18356	58	8	2	2	1	3	1.37117	0.03	0.105	13.9965	0	0	15.5027	0	0	0	70	0	0	0	0	0	0	0	200	0	0	0	0	0	0	0	0	0	0	25	0	0	0	0	0	0	0	0	0	0
30009	1	2	5.16164	25	43	1	2	1	5	4.72125	0.306	0	9.05625	0.34875	0	14.4322	0	0	0	0	0	0	0	0	0	0	0	400	0	0	0	0	0	0	0	0	0	0	0	0	0	0	0	0	0	0	0	0	0
30043	1	1	3.45753	23	43	1	2	1	3	7.05	0.459	0	2.42	0	0	9.929	0	0	0	0	0	0	0	0	0	0	0	200	0	0	0	0	0	0	0	0	0	0	0	0	0	0	0	0	0	0	0	125	0
31003	1	2	2.68219	20	8	1	2	1	2	0.639135	0.0045	0.021	3.24	0	0	3.90463	0	0	0	0	0	0	0	0	0	250	0	0	0	0	0	0	0	0	0	0	0	0	0	0	0	0	0	0	20	0	0	0	0
33137	1	2	4.70959	79	8	4	2	1	4	0.49123	0.1905	0.14	9.331	0	0	10.1527	0	0	0	0	0	0	0	0	0	0	0	200	0	0	0	0	0	0	0	0	0	0	0	0	0	0	0	0	0	0	0	0	0
33176	1	2	3.56438	79	8	4	2	1	3	0.337	0.015	0	10.8035	0	0	11.1555	0	0	0	0	0	0	0	0	0	0	0	200	0	0	0	0	0	0	0	0	0	0	0	0	0	0	0	0	0	0	0	125	0
34060	1	1	5.89315	80	50	4	2	1	5	0.385	0	0	2.025	33.188	0	35.598	0	0	0	0	0	0	0	0	0	0	0	0	0	0	0	0	0	0	0	0	0	0	0	0	0	0	0	0	0	0	0	0	0
34080	1	2	3.92603	80	50	4	2	1	3	0.75	0.0525	0	0	0	0	0.8025	0	0	0	0	250	0	0	0	0	0	0	0	0	0	0	0	0	0	0	0	0	0	0	0	0	0	0	0	0	0	0	0	0
36007	1	1	4.62192	84	46	4	5	1	4	0.1685	0	0	6.138	0	0	6.3065	200	0	0	0	0	0	0	0	0	0	0	200	0	0	0	0	0	0	0	0	0	0	0	0	0	0	0	0	0	0	0	0	0
36009	1	2	5.35068	84	46	4	5	1	5	3.337	0	0	9.331	0	0	12.668	0	0	0	0	0	125	0	0	0	0	0	200	0	0	0	0	0	0	0	0	0	0	0	0	0	0	0	0	0	0	0	125	0
37018	1	2	2.48767	121	3	2	5	1	2	1.2514	0	0	16.7372	0	0	17.9886	0	0	0	0	0	0	0	0	0	0	0	400	0	0	0	0	0	0	0	0	0	0	0	0	0	30	0	0	0	0	0	0	0
37022	1	1	2.01096	121	3	2	5	1	2	1.0155	0	0	9.1205	0	0	10.136	0	0	0	0	0	0	0	0	0	0	0	450	0	0	0	0	0	0	0	0	0	0	0	0	20	0	0	0	0	0	0	0	0
37024	1	1	2.73151	122	3	3	5	1	2	2.579	0.6875	0	6.859	0	0	10.1255	0	0	0	0	0	0	0	0	0	0	0	900	0	0	0	0	0	0	0	0	0	0	0	0	0	0	0	0	0	0	0	125	0
38009	1	1	3.83836	64	12	2	5	1	3	1.4696	0.015	0	7.4648	0	0	8.9494	0	0	0	0	0	0	0	0	0	0	0	200	0	0	0	0	0	0	0	0	0	0	0	0	0	0	0	0	0	0	0	0	0
38030	1	1	4.70685	64	12	2	5	1	4	1.53085	0.0375	0.028	0	0	0	1.59635	0	0	0	0	0	0	0	0	0	0	0	200	0	0	0	0	0	0	0	120	0	0	0	0	0	0	0	0	0	0	0	125	0
38039	1	2	2.21644	64	12	2	5	1	2	0.079	0.031	0	5.766	0	0	5.876	0	0	0	0	0	0	0	0	0	0	0	200	0	0	0	0	0	0	0	60	0	0	0	0	25	0	0	0	0	0	0	0	0
38086	1	1	2.80274	64	12	2	5	1	2	2.816	0.031	0	9.331	0	0	12.178	0	0	0	0	0	0	0	0	0	0	100	0	0	0	0	0	0	0	0	0	0	0	0	0	0	0	0	0	0	0	0	250	0
38206	1	1	2.83836	531	17	3	2	1	2	0.607711	0.0225	10.513	0.93	0	0	12.0732	0	0	0	0	0	0	0	0	0	540	0	200	0	0	0	0	0	0	0	0	0	0	0	0	0	0	0	0	0	0	0	0	0
39054	1	2	1.24932	85	35	4	6	1	#NULL!	0.9	0.045	0	0	0	0	0.945	0	0	0	0	0	0	0	0	0	0	0	700	0	0	0	0	0	0	0	0	0	0	0	0	0	0	0	0	0	0	0	0	0
85048	1	2	4	412	29	1	4	1	4	0.616	0	0	6.34	0	0	6.956	0	0	0	0	0	0	0	0	0	0	0	0	0	0	0	0	0	0	0	0	0	0	0	0	0	0	0	0	30	0	0	0	0
88009	1	1	2.93699	130	46	2	5	1	2	0.022	0.2705	0	0.0002	0.008	0	0.3007	0	0	0	0	0	0	0	0	0	0	0	250	0	0	0	0	0	0	0	0	0	0	0	0	0	0	0	0	0	0	0	125	0
88090	1	1	5.1726	84	46	4	5	1	5	0.427534	0	0.021	11.1972	0	0	11.6457	0	0	0	0	0	0	0	0	0	0	0	400	0	0	0	0	0	0	0	60	0	0	0	0	0	0	0	0	0	0	0	125	0
88108	1	1	2.45753	84	46	4	5	1	2	4.598	0.062	0	7.702	0	0	12.362	0	0	0	190	0	0	0	0	0	0	0	600	0	0	0	0	0	0	30	0	0	0	0	0	0	75	0	0	0	0	0	0	0
89020	1	2	5.19726	82	29	4	4	1	5	1.087	0	0	9.331	0	0	10.418	0	0	0	0	0	0	0	0	0	0	0	400	0	0	0	0	0	0	60	0	0	0	0	0	0	0	0	0	0	0	0	0	0
2001	1	1	5.68219	62	33	2	3	1	5	1.5	0.015	0	3.844	0	0	5.359	0	0	0	0	0	0	0	0	0	0	0	400	0	0	0	0	0	0	60	0	0	0	0	0	0	0	0	0	0	0	0	0	0
2008	1	2	4.51507	62	33	2	3	1	4	7.46377	0.5505	0.042	6.816	0	0	14.8723	0	0	0	125	0	100	0	0	0	0	0	250	0	0	0	0	0	0	0	0	0	0	0	0	0	0	0	0	0	0	0	125	0
3125	1	1	4.13699	73	39	3	3	1	4	4.19685	0.3	0.028	0	0	0.228	4.75285	0	0	0	0	0	0	0	0	0	0	0	500	0	0	0	0	0	0	0	0	0	0	0	0	0	0	0	0	0	0	0	375	0
3131	1	1	1.61644	73	39	3	3	1	1	4.60785	0.162	0.028	2.835	0	0	7.63285	0	0	0	0	0	0	0	0	0	0	0	500	0	0	0	0	0	0	0	0	0	0	0	0	0	0	0	0	0	0	0	125	0
3192	1	2	4.07945	117	39	1	3	1	4	0.545	0.5005	0	12.195	0	0	13.2405	0	0	0	0	0	0	0	0	0	0	0	500	0	0	0	0	0	0	0	0	0	0	0	0	0	0	0	0	0	0	0	0	0
5034	1	1	4.71507	83	48	4	3	1	4	1.716	0.1825	0	0	0	0	1.8985	0	0	0	0	0	0	0	0	0	0	0	250	0	0	0	0	0	0	0	0	0	0	0	0	0	0	0	0	0	0	0	250	0
8002	1	1	4.45479	78	28	4	1	1	4	1.921	1.017	0	4.29	0	0	7.228	0	0	0	0	0	0	0	0	0	300	0	0	0	0	0	0	0	0	0	0	0	0	0	0	0	0	0	0	0	0	0	0	0
8028	1	2	3.39178	403	28	3	1	1	3	0.337	0.015	0	9.331	0	0	9.683	0	0	0	125	0	0	0	0	0	0	0	300	0	0	0	0	0	0	0	0	0	0	0	0	0	0	0	0	0	0	0	0	0
11091	1	1	4.7863	69	47	3	1	1	4	0.1685	0	0	4.6655	0	0	4.834	0	0	0	0	0	0	0	0	0	0	0	200	0	0	0	0	0	0	0	0	0	0	0	0	0	0	0	0	0	0	50	0	0
13022	1	1	4.96438	46	46	1	5	1	4	3.1629	0.015	0.063	6.0605	0	0	9.3014	0	0	0	0	0	0	0	0	0	0	0	200	0	0	0	0	0	0	0	0	0	0	0	0	0	0	0	0	0	0	0	0	0
13048	1	2	2.76164	101	2	1	1	1	2	2.6925	0	0	2.769	0	0	5.4615	0	0	0	0	0	0	0	0	0	0	0	200	0	0	0	0	0	0	120	0	0	0	0	0	0	0	0	0	0	0	0	0	0
14002	1	2	5.54247	67	13	3	1	1	5	1.3572	0.045	0	17.8426	0	0	19.2448	0	0	0	0	0	0	0	0	0	0	0	200	0	0	0	0	0	0	0	0	0	0	0	0	0	0	0	0	0	0	0	0	0
14003	1	2	5.01918	205	13	1	1	1	5	0.674	0	0	18.662	0	0	19.336	0	0	0	0	0	0	0	0	0	0	0	400	0	0	0	0	0	0	60	0	0	0	50	0	0	0	0	0	0	0	0	0	0
14005	1	2	5.04384	67	13	3	1	1	5	1.54	0	0	8.1	0	0	9.64	0	0	0	0	0	0	0	0	0	0	0	830	0	0	0	0	0	0	0	0	0	0	0	0	0	0	0	0	15	0	0	0	0
14007	1	1	2.76986	67	13	3	1	1	2	3.965	0	0	8.032	0	0	11.997	0	0	0	0	0	0	0	0	0	0	0	830	0	0	0	0	0	0	0	0	0	0	0	0	0	0	0	0	0	0	0	0	0
16048	1	1	5.4137	53	6	2	1	1	5	0.022	0.062	0	0.0002	0.008	0	0.0922	0	0	0	0	0	0	0	0	0	0	0	170	0	0	0	0	0	0	0	0	0	0	0	0	0	0	0	0	0	0	0	125	0
17048	1	2	2.0411	54	13	2	1	1	2	0.279315	0.0165	0.07	5.5986	0	0	5.96441	0	0	0	0	0	0	0	0	0	0	0	700	0	0	0	0	0	0	0	0	0	0	0	0	0	0	0	0	0	0	0	125	0
17065	1	1	5.80548	54	13	2	1	1	5	0.337	0.012	9.6305	9.331	0	0	19.3105	0	0	0	0	0	0	0	0	0	0	0	600	0	0	0	0	0	0	60	0	0	0	0	0	0	0	0	0	0	0	0	0	0
24023	1	2	3.24384	60	23	2	4	1	3	4.75711	0.0918	0.07	0	0	0	4.91892	0	0	0	0	0	0	0	0	0	0	0	0	0	0	0	0	0	0	0	0	0	0	0	0	0	0	30	0	0	0	0	500	0
25032	1	1	1.20274	120	41	2	4	1	#NULL!	1.74	0.0075	0	0	0	0	1.7475	0	0	0	0	0	0	0	0	0	0	0	480	0	0	0	0	0	0	0	0	0	0	0	0	0	0	0	0	0	0	0	0	0
27014	1	2	2.4274	56	8	2	2	1	2	2.0607	0.239	0	2.235	9.0125	0	13.5472	0	0	0	0	0	0	0	0	0	0	0	600	0	0	0	0	0	0	0	0	0	0	0	0	0	22	0	0	0	0	0	0	0
27049	1	2	5.63562	56	8	2	2	1	5	5.4685	0.037555	0	1.7875	0.0615	0	7.35506	0	0	0	0	0	0	0	0	0	0	0	125	0	0	0	0	0	0	0	0	0	0	0	0	0	0	0	0	0	0	0	125	0
28001	1	2	4	57	8	2	2	1	4	1.723	0.0675	0	16.621	0	0	18.4115	0	0	0	125	0	0	0	0	0	200	0	0	0	0	0	0	0	0	0	0	0	0	0	0	0	0	0	0	0	0	0	0	0
28054	1	2	4	57	8	2	2	1	4	5.46711	0.114	0.07	0	0	0.0855	5.73661	0	0	0	0	0	0	0	0	0	0	0	300	0	0	0	0	0	0	0	0	0	0	0	0	0	0	0	0	0	0	0	0	0
30007	1	2	2.49863	25	43	1	2	1	2	0	0.153	0	0	0	0	0.153	0	0	0	125	0	0	0	0	0	0	0	0	0	0	0	0	0	0	0	0	0	0	0	0	0	0	0	0	0	0	0	0	0
31012	1	2	3.1863	86	8	2	2	1	3	0.9395	0.17122	0	3.844	0	0	4.95472	0	15	0	0	0	0	0	0	0	0	0	550	0	0	0	0	0	0	0	0	0	0	0	0	0	0	0	0	0	0	0	0	0
33032	1	1	3.4	79	8	4	2	1	3	0.32023	0	0.14	4.992	0.123	0	5.57523	200	0	0	0	0	0	0	0	0	0	0	0	0	0	0	0	0	0	0	0	0	0	0	0	0	0	0	0	0	0	0	125	0
33078	1	2	5.56438	79	8	4	2	1	5	3.434	0.015	0	13.786	0	0	17.235	0	20	0	120	0	0	0	0	0	0	0	250	0	0	0	0	0	0	0	0	0	0	0	0	20	0	0	0	0	0	0	0	0
35014	1	1	5.45753	70	8	3	2	1	5	2.28485	0.13	0.028	4.3282	0.008	0	6.77905	0	0	0	0	0	0	0	0	0	0	0	500	0	0	0	0	0	0	0	0	0	0	0	0	0	0	0	0	20	0	0	125	0
36014	1	2	5.72329	84	46	4	5	1	5	0.746904	0.17411	0.063	0.1003	0.012	0	1.09631	0	0	0	0	0	0	0	0	0	0	0	400	0	0	0	0	0	0	0	0	0	0	0	0	0	30	0	0	0	0	0	125	0
38066	1	1	2.48493	64	12	2	5	1	2	1.22585	0.1715	0.028	9.331	0	0	10.7563	0	0	0	0	0	0	0	0	0	0	0	100	0	200	0	0	0	0	100	0	0	0	0	0	0	0	0	0	0	0	0	125	0
38093	1	1	2.49863	45	12	1	5	1	2	4.91288	0.0765	0.021	13.7218	0.34875	0	19.0809	0	0	0	0	0	0	0	0	0	0	0	280	0	0	0	0	0	0	0	0	0	0	0	0	0	0	0	0	0	0	0	0	0
38172	1	1	5.45205	115	17	1	2	1	5	0.1685	0	0	6.5875	0	0	6.756	0	0	0	75	0	0	0	0	0	0	0	200	0	0	0	0	0	0	0	0	0	0	0	0	0	0	0	0	0	0	0	0	0
38192	1	1	4.66027	530	17	1	2	1	4	0.2696	0.03	0	7.4648	0	0	7.7644	0	0	0	0	0	0	0	0	0	0	0	200	0	0	0	0	0	0	0	0	0	0	0	0	25	0	0	0	0	0	0	0	125
38204	1	1	2.32329	531	17	3	2	1	2	5.83362	0.0323	0.014	0.78	0.495	0	7.15492	0	0	0	135	0	0	0	0	0	0	0	270	0	0	0	0	0	0	0	0	0	0	0	0	15	0	0	0	0	0	0	0	0
38205	1	2	2.03836	531	17	3	2	1	2	1.30148	0.0905	0.049	0.242	0	0	1.68298	0	0	0	0	0	0	0	0	0	0	0	250	0	0	0	0	0	0	0	0	0	0	0	0	0	0	0	0	0	0	0	0	0
38220	1	2	3.6137	531	17	3	2	1	3	6.16362	0.0323	0.014	6.075	0	0	12.2849	0	0	0	135	0	0	0	0	0	0	0	270	0	0	0	0	0	0	0	0	0	0	0	0	0	0	15	0	0	0	0	0	0
85003	1	1	3.19726	119	29	3	4	1	3	8.99096	0.138	0.098	2.42	0	0	11.647	0	0	0	0	0	0	0	0	0	0	0	700	0	0	0	0	0	0	0	0	0	0	0	0	0	0	0	0	0	0	0	0	0
88091	1	1	2.63014	84	46	4	5	1	2	0	0.03	0	1.085	0	0	1.115	0	0	0	0	0	0	0	0	0	0	0	180	0	0	0	0	0	0	60	0	0	0	0	0	0	0	0	0	0	0	0	0	0
89004	1	2	4.22192	82	29	4	4	1	4	0.337	0	0	9.331	0	0	9.668	0	0	0	0	0	100	0	0	0	0	0	400	0	0	0	0	0	0	0	0	0	0	0	0	0	0	0	0	0	0	0	0	0
88018	2	1	11.2356	129	46	1	5	3	11	2.9574	0.3825	0.05	11.6902	0	0	15.0801	0	0	0	0	0	0	0	0	0	0	0	200	0	200	0	0	0	0	0	0	0	0	0	0	0	0	0	0	0	0	0	0	0
11056	2	1	7.49315	69	47	3	1	2	7	0.525	0	0	0	0	0	0.525	0	0	0	0	0	0	0	0	0	500	0	0	0	0	0	0	0	0	0	0	0	0	0	0	0	10	20	0	0	0	0	0	0
17072	2	2	8.16986	54	13	2	1	2	8	0	0	0	2.883	0	0	2.883	0	0	0	0	0	0	0	0	0	0	0	0	0	0	0	0	0	0	0	0	0	0	0	0	0	0	0	0	0	0	0	0	0
85033	2	2	10.5726	119	29	3	4	3	10	0	0	0	0	0	0	0	675	0	0	0	0	0	0	0	0	0	0	0	0	0	0	0	0	0	0	0	0	0	0	0	0	0	0	0	0	0	0	0	0
85043	2	2	11.6521	119	29	3	4	3	11	0	0	0	0	0	0	0	0	0	0	0	0	0	0	0	0	0	0	0	0	0	0	0	0	0	0	0	0	0	0	0	0	0	0	0	0	0	0	125	0
2021	2	1	6.12877	62	33	2	3	2	6	11.1	0.0075	0	0.04	0	0	11.1475	0	0	0	0	0	0	0	0	0	400	0	200	0	0	0	0	0	0	0	0	0	0	0	0	0	0	0	0	20	0	0	0	0
2028	2	2	9.53973	62	33	2	3	2	9	0.787	0	0	9.331	0	0	10.118	0	0	0	0	0	0	0	0	0	0	0	450	0	0	0	0	0	0	0	0	0	0	0	0	0	0	0	0	30	0	0	0	0
2034	2	1	11.0082	62	33	2	3	3	11	1.6	0.015	0	3.924	0	0	5.539	0	0	0	0	0	0	0	0	0	0	0	1200	0	0	0	0	0	0	0	0	0	0	0	0	0	40	0	0	40	0	0	0	0
2107	2	2	9.12055	500	33	3	3	2	9	1.5	0.015	0	7.688	0	0	9.203	0	0	0	0	0	0	0	0	0	0	250	0	0	0	0	0	0	0	0	0	0	0	0	0	0	0	25	0	10	0	0	0	0
3003	2	2	10.9973	44	39	1	3	3	11	2.4185	0	0	4.6655	0	0	7.084	0	0	0	0	0	0	0	0	0	0	0	250	0	0	0	0	0	0	0	0	0	0	0	0	0	0	0	0	0	0	0	0	0
3025	2	1	6.24658	44	39	1	3	2	6	0.337	0	0	9.331	0	0	9.668	0	0	0	0	0	0	0	0	0	0	0	400	0	0	0	0	0	0	0	0	0	0	0	0	0	0	0	0	0	0	0	0	0
3032	2	2	8.65753	44	39	1	3	2	8	2.3225	0.6975	0	7.7675	0	0	10.7875	0	0	0	0	0	0	0	0	0	0	0	250	0	0	0	0	0	0	0	0	0	0	0	0	0	0	0	0	0	0	0	0	0
3055	2	1	8.38904	44	39	1	3	2	8	8.27169	0.576	0.056	4.9	0	0	13.8037	0	0	0	0	0	90	0	0	0	0	0	200	0	0	0	0	0	0	0	0	0	0	0	0	0	0	0	0	0	0	0	0	0
3083	2	1	9.37534	73	39	3	3	2	9	1.837	0.03	0	9.331	0	0	11.198	0	0	0	125	0	0	0	0	0	500	0	0	0	0	0	0	0	0	0	0	0	0	0	0	0	0	0	0	0	0	0	0	0
3111	2	1	11.3315	73	39	3	3	3	11	2.954	0.6525	0	7.947	0	0	11.5535	0	0	0	0	0	0	0	0	0	0	0	200	0	0	0	0	0	0	0	0	0	0	0	0	0	0	0	0	0	0	0	250	0
3145	2	1	6.7589	44	39	1	3	2	6	3.4685	0.2505	0	4.6655	0	0	8.3845	0	0	0	0	0	0	0	0	0	0	0	250	0	0	0	0	0	0	0	0	0	0	0	0	0	0	0	0	0	0	0	0	0
3155	2	1	9.1589	73	39	3	3	2	9	1.6685	0.0225	0	4.6655	0	0	6.3565	0	0	0	0	0	0	0	0	0	0	0	250	0	0	0	0	0	0	0	0	0	0	0	0	0	0	0	0	0	0	0	125	0
3194	2	2	11.5918	117	39	1	3	3	11	3.9185	0	0	8.5095	0	0	12.428	0	0	0	0	0	0	0	0	0	0	0	250	0	0	0	0	0	0	0	0	0	0	0	0	0	0	0	0	0	0	0	0	0
3195	2	2	11.0548	117	39	1	3	3	11	0.337	0	0	9.331	0	0	9.668	0	0	0	0	0	0	0	0	0	0	0	300	0	0	0	0	0	0	0	0	0	0	0	0	0	0	0	0	0	0	0	125	0
3306	2	1	10.611	117	39	1	3	3	10	0.674	0.0105	0	18.662	0	0	19.3465	0	0	0	0	0	0	0	0	0	0	0	550	0	0	0	0	0	0	0	0	0	0	0	0	0	0	0	0	0	0	0	125	0
3307	2	1	11.5452	117	39	1	3	3	11	0.882	0.496	0	11.916	0	0	13.294	0	0	0	0	0	0	0	0	0	0	0	600	0	0	0	0	0	0	0	0	0	0	0	0	0	0	0	0	0	0	0	0	0
4027	2	1	6.6	425	39	1	3	2	6	0.812	0.632	0	3.102	0	0	4.546	0	0	0	0	0	0	0	0	0	0	0	300	0	0	0	0	0	0	0	0	0	0	0	0	0	0	0	0	0	0	0	0	0
4047	2	1	10.2219	432	39	1	3	3	10	0	0	17.51	0	0	0	17.51	0	0	0	0	0	100	0	0	0	400	0	0	0	0	0	0	0	0	0	0	0	0	0	0	0	0	0	0	40	0	0	0	0
4063	2	1	6.55616	420	39	3	3	2	6	0	0.06	0	3.1	0	0	3.16	0	0	0	0	0	0	0	0	0	0	0	200	0	0	0	0	0	0	0	0	0	0	0	0	0	0	0	0	0	0	0	125	0
5003	2	2	6.71507	83	48	4	3	2	6	0	0.018	0	0	0	0	0.018	0	0	0	0	110	0	0	0	0	0	0	250	0	0	0	0	0	0	0	0	0	0	0	0	0	0	0	0	0	0	0	0	0
5009	2	1	11.8932	83	48	4	3	3	11	0.99	0.124	0	18.662	0	0	19.776	0	0	0	0	0	0	0	0	0	300	0	0	0	0	0	0	0	0	0	0	0	0	0	0	0	0	0	0	0	0	0	250	0
5020	2	1	8.42192	83	48	4	3	2	8	1.71654	0.12	0.084	12.436	0	0	14.3565	0	0	0	0	0	0	0	0	0	0	200	0	0	0	0	0	0	0	0	0	0	0	0	0	20	0	0	0	0	0	0	0	0
5022	2	1	6.76712	83	48	4	3	2	6	0.225	0	0	12.1086	0	0	12.3336	0	0	0	0	0	0	0	0	0	0	0	200	0	0	0	0	0	0	0	0	0	0	0	0	0	0	0	0	0	0	0	250	0
5208	2	2	6.44658	516	20	2	3	2	6	2.80862	0.3435	0.07	4.6655	0	0	7.88762	0	0	0	0	0	0	0	0	0	0	0	200	0	0	0	0	0	0	0	0	0	0	0	0	0	0	0	0	20	0	0	250	0
5303	2	1	10.0685	510	20	3	3	3	10	0.674	0.03	0	18.662	0	0	19.366	0	0	0	0	0	100	0	0	0	200	0	0	0	0	0	0	0	0	0	0	0	0	0	0	0	0	0	0	20	0	0	0	0
5311	2	1	6.19178	510	20	3	3	2	6	0.3	0.015	0	1.24	0	0	1.555	0	0	0	0	0	0	0	0	0	0	0	0	0	0	0	0	0	0	0	0	0	0	0	0	0	0	0	0	20	0	0	0	0
5379	2	1	10.7863	510	20	3	3	3	10	1.308	0.1025	0	0	0	0	1.4105	0	0	0	0	0	0	0	0	0	900	1000	0	0	0	0	0	0	0	0	0	0	0	0	0	0	0	0	0	90	0	0	0	0
5519	2	2	7.36438	75	1	3	3	2	7	6.2846	0.5625	0	8.6748	0	0	15.5219	0	0	0	0	0	0	0	0	0	0	0	600	0	0	0	0	0	0	0	0	0	0	0	0	0	0	0	0	0	0	0	0	0
7026	2	1	10.126	75	1	3	3	3	10	0.337	0.153	0	9.331	0	0	9.821	0	0	0	0	0	0	0	0	0	600	0	0	0	0	0	0	0	0	0	0	0	0	0	0	0	0	0	0	0	0	0	0	0
11127	2	1	8.10685	69	47	3	1	2	8	1.496	0.367	0	1.5514	0.016	0	3.4304	0	0	0	0	0	120	0	0	0	0	0	200	0	0	0	0	0	0	0	0	0	0	0	0	0	10	0	0	0	0	0	0	0
13006	2	1	9.85479	101	2	1	1	2	9	2.587	0	0	9.331	0	0	11.918	0	0	0	0	0	0	0	0	0	400	0	0	0	0	0	0	0	0	0	0	0	0	0	0	0	0	0	0	0	0	0	0	0
13010	2	2	7.67123	101	2	1	1	2	7	4.5975	0.628	0	2.948	0	0	8.1735	0	0	0	0	0	0	0	0	0	0	0	200	0	0	0	0	0	0	60	0	0	0	0	0	0	0	0	0	0	0	0	0	0
14077	2	1	10.7068	135	13	2	1	3	10	3	0.03	5.52	0	0	0	8.55	0	0	0	0	0	0	0	0	0	0	0	0	0	0	0	0	0	0	0	0	0	0	0	0	0	0	0	0	0	0	0	0	0
15010	2	2	6.23288	203	13	1	1	2	6	1.537	0.03	0	9.406	0	0	10.973	0	0	0	0	0	0	0	0	0	0	0	400	0	0	0	0	0	0	0	0	0	0	0	0	0	0	0	0	0	0	0	0	0
16016	2	1	11.1479	53	6	2	1	3	11	0.337	0	0	9.331	0	0	9.668	0	0	0	0	95	0	0	0	0	400	0	0	0	0	0	0	0	0	0	0	0	0	0	0	0	0	0	0	0	0	0	0	0
16017	2	1	11.1205	53	6	2	1	3	11	0	0.009	0	0	0	0	0.009	0	0	0	0	0	0	0	0	0	0	0	200	0	0	0	0	0	0	0	0	0	0	0	0	0	0	0	0	0	0	0	0	0
17005	2	1	11.1699	78	28	4	1	3	11	0.398692	0.015	0.056	9.331	0	0	9.80069	0	0	0	0	0	0	0	0	0	0	0	800	0	0	0	0	0	0	0	0	0	0	0	0	0	0	0	0	0	0	0	0	0
17014	2	2	8.37808	54	13	2	1	2	8	0.4718	0.018	0	13.0634	0	0	13.5532	0	0	0	0	0	0	0	0	0	0	0	600	0	0	0	0	0	0	0	0	0	0	0	0	0	0	0	0	15	0	0	125	0
17026	2	1	8.80274	54	13	2	1	2	8	0.6131	0.0075	0.04	13.5415	0	0	14.2021	0	0	0	0	0	0	0	0	0	0	0	500	0	0	0	0	0	0	0	0	0	0	0	0	30	0	0	0	0	0	0	0	0
17044	2	1	9.80274	54	13	2	1	2	9	0.184069	0.00633	0.042	3.7324	0	0	3.9648	0	0	0	140	0	0	0	0	0	0	0	200	0	0	0	0	0	0	0	0	0	0	0	0	0	0	0	0	0	0	0	0	0
17050	2	2	7.6	54	13	2	1	2	7	0.4044	0	0	11.1972	0	0	11.6016	0	0	0	0	0	0	0	0	0	0	0	400	0	0	0	0	0	0	0	0	0	0	0	0	0	0	0	0	0	0	0	0	0
17056	2	2	11.5863	54	13	2	1	3	11	0.2022	0.03	0	14.8242	0	0	15.0564	0	0	0	0	0	0	0	0	0	0	0	200	0	0	0	0	0	0	0	0	0	0	0	0	0	0	0	0	0	0	0	0	0
20015	2	2	8.68219	141	29	2	4	2	8	5.9955	0.0615	0	0.0003	0.237	0	6.2943	0	0	0	0	0	180	0	0	0	0	0	400	0	0	0	0	0	0	0	0	0	0	0	0	0	0	0	0	10	0	0	0	0
21016	2	1	6.92055	81	41	4	4	2	6	0.1685	0.127	0	4.6655	0	0	4.961	0	0	0	0	0	0	0	0	0	0	0	400	0	0	0	0	0	0	0	0	0	0	0	0	0	20	0	0	0	0	0	0	0
22013	2	2	8.67945	72	23	3	4	2	8	0.02	0	0	0.016	0	0	0.036	0	0	0	0	0	0	0	0	0	0	0	500	0	0	0	0	0	0	0	0	0	0	0	0	0	0	0	0	0	0	0	0	0
22081	2	1	9.07671	104	4	1	4	2	9	11.0755	0.03	0	4.6655	0.45	0	16.221	0	0	0	125	0	0	0	0	0	0	0	250	0	0	0	0	0	50	0	0	0	0	0	0	0	0	0	0	0	0	0	0	0
22087	2	2	11.0849	104	4	1	4	3	11	3.97992	0.044	0.196	10.596	0.186	0	15.0019	0	0	0	0	0	0	0	0	0	0	0	0	0	0	0	0	0	0	0	0	0	0	0	0	0	0	0	0	0	0	0	0	0
24014	2	1	6.14521	60	23	2	4	2	6	6.98461	0.684	0.07	9.381	0	0	17.1196	0	0	0	0	0	0	0	0	0	0	0	200	0	0	0	0	0	0	0	0	0	0	0	0	0	0	0	0	0	0	0	0	0
24035	2	2	6.12877	60	23	2	4	2	6	1.31186	1.08242	0.217	13.9965	0	0	16.6078	200	0	0	0	0	0	0	0	0	0	0	200	0	0	0	0	0	0	0	0	0	0	0	0	0	0	0	0	0	0	0	0	0
24036	2	2	9.0274	60	23	2	4	2	9	2.662	0.6885	0	9.331	0	0	12.6815	0	0	0	0	0	0	0	0	0	0	0	400	0	0	0	0	0	0	0	0	0	0	0	0	0	0	0	0	0	0	0	0	0
24039	2	1	9.75616	60	23	2	4	2	9	8.60934	1.266	0.084	5.8755	0	0	15.8348	0	0	0	0	0	0	0	0	0	0	0	200	0	0	0	0	0	0	0	0	0	0	0	0	0	0	0	0	0	0	0	0	0
25022	2	2	10.7123	120	41	2	4	3	10	3.50913	0.178	0.021	3.32	0	0	7.02813	0	0	0	0	0	0	0	0	0	0	0	400	0	0	0	0	0	0	0	0	0	0	0	0	0	0	0	0	0	0	0	0	0
28080	2	1	11.6164	71	8	3	2	3	11	2.88411	0.1575	0.07	4.05	0	0	7.16162	0	0	0	0	0	0	0	0	0	400	0	0	0	0	0	0	0	0	0	0	0	0	0	0	0	0	0	0	40	0	0	0	0
30044	2	1	9.13425	23	43	1	2	2	9	0	0.306	0	2.3064	0	0	2.6124	0	0	0	0	0	0	0	0	0	0	0	400	0	0	0	0	0	0	0	0	0	0	0	0	0	0	0	0	0	0	0	0	0
31021	2	2	9.16712	86	8	2	2	2	9	1.5735	0.0465	14.8835	0	0	0	16.5035	0	0	0	0	0	125	0	0	0	0	0	200	0	0	0	0	0	0	0	0	0	0	0	0	0	0	0	0	0	0	0	0	0
34064	2	1	6.15068	80	50	4	2	2	6	2.1495	1.225	0	15.7935	0	0	19.168	0	0	0	0	0	0	0	0	0	0	250	0	0	0	0	0	0	0	0	0	0	0	0	0	0	0	0	0	0	0	0	125	0
34068	2	2	9.49041	80	50	4	2	2	9	1.415	0	0	16.1635	0	0	17.5785	0	0	0	0	0	0	0	0	0	250	0	0	0	0	0	0	0	0	0	0	0	0	0	0	0	0	0	0	0	0	0	0	0
34085	2	2	11.4247	80	50	4	2	3	11	1.75	0.0525	0.05	10.308	0	0	12.1605	0	0	0	0	0	0	0	0	0	0	0	200	0	0	0	0	0	0	0	0	0	0	0	0	0	0	0	0	0	0	0	125	0
37043	2	1	6.11781	121	3	2	5	2	6	2.137	0	0	14.136	0	0	16.273	0	0	0	0	0	0	0	0	0	0	0	400	0	0	0	0	0	0	0	0	0	0	0	0	0	0	0	0	0	0	0	0	0
38040	2	2	9.99178	64	12	2	5	2	10	0.079	0.031	0	0	0	0	0.11	0	0	0	0	0	0	0	0	0	0	0	200	0	0	0	0	0	0	0	0	0	0	0	0	50	0	0	0	0	0	0	0	0
38137	2	1	10.537	114	17	3	2	3	10	0.666903	0.07	0.063	4.7155	0	0	5.5154	200	15	0	0	0	0	0	0	0	200	0	0	0	0	0	0	0	0	0	0	0	0	0	0	0	25	0	0	0	0	0	0	0
38156	2	2	8.92055	114	17	3	2	2	8	1.2935	0	0	8.5095	0	0	9.803	0	0	0	0	0	0	0	0	0	0	0	150	0	0	0	0	0	0	0	0	0	0	0	0	0	0	0	0	0	0	0	375	0
38157	2	1	7.01918	114	17	3	2	2	7	1.2935	0	0	8.5095	0	0	9.803	0	0	0	0	0	0	0	0	0	0	0	150	0	0	0	0	0	0	0	0	0	0	0	0	0	0	0	0	0	0	0	375	0
39013	2	1	7.64932	85	35	4	6	2	7	1.0552	0	0	9.8171	0.0615	0	10.9338	0	0	0	0	0	0	0	0	0	0	0	400	0	0	0	0	0	0	0	0	0	0	0	20	0	0	0	0	0	0	0	0	0
73004	2	2	9.08767	18	8	1	2	2	9	8.137	0.042	0	11.751	0	0	19.93	0	0	0	125	0	0	0	0	0	0	0	500	0	0	0	0	0	0	0	0	0	0	0	0	0	0	0	0	25	0	0	0	0
85009	2	1	10.9836	119	29	3	4	3	10	0	0	0	0	0	0	0	0	0	0	100	0	0	0	0	0	0	0	200	0	0	0	0	0	0	0	0	0	0	0	0	0	0	0	0	0	0	0	0	0
85052	2	2	9.92877	412	29	1	4	2	9	2.0392	0	0	14.9296	0	0	16.9688	0	0	0	0	0	0	0	0	0	0	0	500	0	0	0	0	0	20	0	0	0	0	0	0	0	0	0	0	0	0	0	0	0
87042	2	1	9.37808	217	30	1	5	2	9	6.14438	0.674	0.112	0	0	0	6.93038	0	0	0	0	0	0	0	0	0	500	0	0	0	0	0	0	0	0	0	0	0	0	0	0	0	0	0	0	0	0	0	0	0
88071	2	2	8.32877	129	46	1	5	2	8	1.9499	0.368	0	11.8022	0	0	14.1201	0	0	0	0	0	0	0	0	0	0	0	400	0	0	0	0	0	0	0	0	0	0	0	0	0	0	0	0	0	0	0	0	0
88109	2	2	8.54521	129	46	1	5	2	8	7.41	0.153	0	0	0	0	7.563	0	0	0	0	0	0	0	0	0	0	0	200	0	0	0	0	0	0	0	0	0	0	0	0	30	0	0	0	0	0	0	0	0
3048	2	2	6.29589	44	39	1	3	2	6	2.7635	0.0675	0	15.0815	0	0	17.9125	0	0	0	0	0	0	0	0	0	0	0	750	0	0	0	0	0	0	0	60	0	0	0	0	0	0	0	0	0	0	0	0	0
3102	2	1	10	73	39	3	3	3	10	0.022	0.0515	0	7.6882	0.008	0	7.7697	0	0	0	0	0	0	0	0	0	0	0	250	0	0	0	0	0	0	0	0	0	0	0	0	0	0	0	0	15	0	0	0	0
3114	2	2	6.27397	73	39	3	3	2	6	0.1685	0.03	0	4.6655	0	0	4.864	0	0	0	0	0	0	0	0	0	0	0	200	0	0	0	0	0	0	70	0	0	0	0	0	0	0	0	0	0	0	0	0	0
3124	2	2	6.51233	73	39	3	3	2	6	4.19685	0.3255	0.028	0	0	0	4.55035	0	0	0	0	0	0	0	0	0	0	0	250	0	0	0	0	0	0	0	0	0	0	0	0	0	0	0	0	0	0	0	0	250
3304	2	1	10.7397	117	39	1	3	3	10	2.587	0.045	0	13.175	0	0	15.807	0	0	0	0	0	0	0	0	0	0	0	250	0	0	0	0	0	0	0	0	0	0	0	0	0	0	0	0	0	0	0	125	0
3305	2	1	8.00548	117	39	1	3	2	8	2.587	0.045	0	13.175	0	0	15.807	0	0	0	0	0	0	0	0	0	0	0	250	0	0	0	0	0	0	0	0	0	0	0	0	0	0	0	0	0	0	0	0	0
5038	2	2	7.70137	83	48	4	3	2	7	0	0.0225	0	0	0	0	0.0225	0	0	0	0	0	0	0	0	0	0	0	300	0	0	0	0	0	0	60	0	0	0	0	0	30	0	0	0	0	0	0	0	0
5218	2	2	9.55068	517	20	1	3	2	9	2.547	0.205	0	9.332	0.04	0	12.124	0	0	0	0	0	0	0	0	0	0	0	200	0	0	0	0	0	0	0	0	0	0	0	0	0	0	0	0	0	0	0	0	0
5219	2	1	9.29315	510	20	3	3	2	9	1.387	0.015	0	9.331	0	0	10.733	200	0	0	0	0	0	0	0	0	0	0	400	0	0	0	0	0	0	0	0	0	0	0	0	0	0	0	0	0	0	0	0	0
8026	2	2	7.52603	403	28	3	1	2	7	0.75	0.03	0	9.61	0	0	10.39	0	0	0	0	0	0	0	0	0	0	0	150	0	0	0	0	0	0	0	0	0	0	0	0	0	0	20	0	0	0	0	125	0
8027	2	1	6.29315	403	28	3	1	2	6	0	0.2295	0	0	0	0	0.2295	200	0	0	0	0	0	0	0	0	0	0	200	0	0	0	0	0	0	120	0	0	0	0	0	0	0	0	0	0	0	0	125	0
10001	2	1	6.57808	78	28	4	1	2	6	1.36323	0.76	0.14	13.467	0	0	15.7302	0	0	0	0	0	0	0	0	0	0	0	500	0	0	0	0	0	0	0	0	0	0	0	0	0	0	0	0	0	0	0	0	0
10002	2	1	7.21644	78	28	4	1	2	7	0.391	0	0	0.187	0.123	0	0.701	0	0	0	0	0	0	0	0	0	0	0	0	0	0	0	0	0	0	0	0	0	0	0	0	0	0	0	0	0	0	0	0	0
10003	2	2	10.2329	78	28	4	1	3	10	0.391	0	0	0.187	0.123	0	0.701	0	0	0	0	0	0	0	0	0	0	0	0	0	0	0	0	0	0	0	0	0	0	0	0	0	0	0	0	0	0	0	0	0
11105	2	2	11.2384	69	47	3	1	3	11	1.2185	0.06	0	1.09	0	0	2.3685	0	0	0	140	0	0	0	0	0	200	0	0	0	0	0	0	0	0	0	0	0	0	0	0	0	0	0	0	0	0	0	0	0
14009	2	2	10.1863	211	13	1	1	3	10	0.5055	0.03	0	13.9965	0	0	14.532	0	0	0	0	0	0	0	0	0	0	0	225	0	0	0	0	0	0	0	0	0	0	0	0	0	0	0	0	0	0	0	0	0
14011	2	2	8.91781	67	13	3	1	2	8	1.35423	0.2295	7.144	0.012	0	0	8.73973	0	0	0	0	0	0	0	0	0	0	0	500	0	0	0	0	0	0	0	0	0	0	0	0	0	0	0	0	0	0	0	0	0
14015	2	2	8.8411	67	13	3	1	2	8	2.372	0.76	7.004	4.136	0	0	14.272	0	0	0	0	0	0	0	0	0	0	0	550	0	0	0	0	0	0	0	0	0	0	0	0	0	0	0	0	0	0	0	125	0
15009	2	2	7.81096	133	13	2	1	2	7	1.087	0	0	10.416	0	0	11.503	0	0	0	0	0	0	0	0	0	0	0	250	0	0	0	0	0	0	100	0	0	0	0	0	0	35	0	0	0	0	0	0	0
17070	2	1	8.65753	54	13	2	1	2	8	2.25	0.0225	9.6305	0	0	0	11.903	0	0	0	0	0	0	0	0	0	0	0	800	0	0	0	0	0	0	0	0	0	0	0	0	0	0	0	0	0	0	0	0	0
21006	2	2	10.537	138	41	1	4	3	10	1.525	0.648	0	4.455	0	0	6.628	200	0	0	0	0	0	0	0	0	0	0	0	0	0	0	0	0	0	0	0	0	0	0	0	0	0	0	0	0	0	0	0	0
22038	2	1	7.66301	72	23	3	4	2	7	1.86169	0.06	0.056	0	0	0	1.97769	0	0	0	0	0	0	0	0	0	0	0	500	0	0	0	0	0	0	0	0	0	0	0	0	0	0	0	0	0	0	0	0	0
22083	2	1	11.4767	104	4	1	4	3	11	1.90585	0	0.028	0	0	0	1.93385	250	0	0	0	0	0	0	0	0	0	0	0	0	0	0	0	0	0	0	0	0	0	0	0	0	25	0	0	0	0	0	0	0
24034	2	2	8.90959	60	23	2	4	2	8	7.98841	0.576	0.07	1.4725	0	0	10.1069	0	0	0	0	0	0	0	0	0	0	0	200	0	0	0	0	0	0	0	0	0	0	0	0	0	0	0	0	0	0	0	0	0
24037	2	1	11.0493	60	23	2	4	3	11	0.2888	0.153	0	2.945	0	0	3.3868	0	0	0	0	0	0	0	0	0	0	0	1000	0	0	0	0	0	0	0	0	0	0	0	0	0	0	0	0	0	0	0	0	0
28009	2	1	10.3808	57	8	2	2	3	10	7.56611	0.0985	0.07	0	0	0	7.73461	0	0	0	100	0	0	0	0	0	250	0	0	0	0	0	0	0	0	0	0	0	0	0	0	0	20	0	0	0	0	0	0	0
28022	2	1	8.93973	57	8	2	2	2	8	0.8055	0.03	0	13.9965	0	0	14.832	0	0	0	0	0	0	0	0	0	0	0	200	0	0	0	0	0	0	0	0	0	0	0	0	15	0	0	0	0	0	0	125	0
28028	2	1	10.937	57	8	2	2	3	10	2.64284	0.2895	0.21	4.6655	0	0	7.80785	0	0	0	100	0	0	0	0	0	600	0	0	0	0	0	0	0	0	0	0	0	0	0	0	0	0	0	0	0	0	0	0	0
28052	2	2	11.1589	71	8	3	2	3	11	3.675	0.075	0	2.655	0	0	6.405	0	0	0	0	0	0	0	0	0	0	0	200	0	0	0	0	0	0	0	0	0	0	0	0	0	0	0	0	0	0	0	0	0
28055	2	2	9.92055	71	8	3	2	2	9	2.34338	0.837	0.126	13.7866	0.024	0	17.117	0	0	0	0	0	0	0	0	0	0	0	200	0	0	0	0	0	0	0	0	0	0	0	0	0	0	0	0	0	0	0	125	0
28057	2	2	10.611	71	8	3	2	3	10	5.66581	0.6485	0.126	5.665	0	0	12.1053	0	0	0	0	0	0	0	0	0	400	0	0	0	0	0	0	0	0	0	0	0	0	0	0	0	0	0	0	0	0	0	0	0
28058	2	1	6.69589	71	8	3	2	2	6	1.95	0.03	0	0	0	0	1.98	0	0	0	0	0	25	0	0	0	0	0	200	0	0	0	0	0	0	0	0	0	0	0	0	0	0	0	0	15	0	0	0	0
28068	2	1	6.15068	71	8	3	2	2	6	3.13454	0.0775	0.084	2.09662	10.9515	0	16.3442	0	0	0	0	0	0	0	0	0	0	0	400	0	0	0	0	0	0	0	0	0	0	0	0	0	0	0	0	0	0	0	0	0
28072	2	2	11.5151	71	8	3	2	3	11	0	0.075	0	1.705	0	0	1.78	0	0	0	0	0	0	0	0	0	0	0	250	0	0	0	0	0	0	0	0	0	0	0	10	0	0	0	0	0	0	0	125	0
30008	2	1	10.7205	25	43	1	2	3	10	1.837	0.5355	0	9.331	0	0	11.7035	0	0	0	0	0	0	0	0	0	0	0	200	0	0	0	0	0	0	0	0	0	0	0	0	40	0	0	0	0	0	0	0	0
30080	2	2	8.72055	22	43	1	2	2	8	0	0.153	0	5.766	0	0	5.919	0	0	0	0	0	0	0	0	0	200	0	0	0	0	0	0	0	0	0	0	0	0	0	0	0	0	0	0	0	0	0	0	0
31007	2	1	11.9397	17	8	1	2	3	11	3.4995	0.075	0.1	3.869	0	0	7.5435	0	0	0	0	0	0	0	0	0	0	0	200	0	0	0	0	0	0	0	0	0	0	0	0	0	0	0	0	0	0	0	125	0
33002	2	2	7.03288	79	8	4	2	2	7	2.45423	0.015	0.14	7.728	0	0	10.3372	200	0	0	0	0	0	0	0	0	0	200	0	0	0	0	0	0	0	0	0	0	0	0	0	0	0	0	0	0	0	0	125	0
33029	2	1	7.93973	79	8	4	2	2	7	6.25211	0.306	0.07	11.532	0	0	18.1601	0	0	0	0	0	125	0	0	0	0	0	0	0	0	0	0	0	0	0	0	0	0	0	0	0	0	0	0	0	0	0	250	0
33084	2	1	10.3644	79	8	4	2	3	10	8.03136	0	5.8	4.6655	0	0	18.4969	0	0	0	0	0	55	0	0	0	0	0	250	0	0	0	0	0	0	0	0	0	0	0	0	0	0	0	0	0	0	0	0	0
33139	2	2	11.8712	79	8	4	2	3	11	2.74123	0.045	0.14	9.331	0	0	12.2572	0	0	0	0	0	0	0	0	0	0	0	400	0	0	0	0	0	0	0	0	0	0	0	0	0	0	0	0	0	0	0	125	0
34082	2	2	11.7644	80	50	4	2	3	11	2.636	0.3825	7.004	0.187	0.123	0	10.3325	0	0	0	0	0	0	0	0	0	0	0	450	0	0	0	0	0	0	0	0	0	0	0	0	0	0	0	0	0	0	0	0	0
34089	2	1	10.5671	80	50	4	2	3	10	0	0.0075	0	0	0	0	0.0075	0	0	0	160	0	0	0	0	0	0	0	400	0	0	0	0	0	0	0	0	0	0	0	0	60	0	0	0	0	0	0	0	0
35049	2	2	8.5726	70	8	3	2	2	8	3.3655	0.0525	0	13.9965	0.03	0	17.4445	0	0	0	0	0	0	0	0	0	0	0	200	0	0	0	0	0	0	120	0	0	0	0	15	0	0	0	0	0	0	0	0	0
37044	2	2	7.4	121	3	2	5	2	7	0	0.153	0	0	0	0	0.153	0	0	0	0	0	0	0	0	0	0	0	0	0	0	0	0	0	0	0	0	0	0	0	0	0	0	0	0	0	0	0	0	0
38033	2	2	7.4	64	12	2	5	2	7	2.13011	0.1825	0.07	14.136	0	0	16.5186	0	0	0	0	0	0	0	0	0	250	0	0	0	0	0	0	0	0	0	0	0	0	0	0	25	0	0	0	0	0	0	0	0
38080	2	1	8.93425	107	12	2	5	2	8	10.6645	0.4082	0	4.6655	0.45	0.0228	16.211	0	0	0	0	0	0	0	0	0	265	0	0	0	0	0	0	0	0	0	120	0	0	0	0	0	0	0	0	0	0	0	0	0
38173	2	2	9.98082	115	17	1	2	2	9	3.16392	0	0.014	4.6655	0	0	7.84342	0	0	0	0	0	0	0	0	0	0	0	240	0	0	0	0	0	0	0	0	0	0	0	0	0	0	0	0	0	0	0	0	0
39003	2	2	9.82466	85	35	4	6	2	9	4.19	0.917	0	6.7905	0	0	11.8975	0	0	0	0	0	0	0	0	0	0	0	500	0	0	0	0	0	0	0	0	0	0	0	0	0	0	0	0	0	0	0	0	0
39019	2	2	9.08767	85	35	4	6	2	9	2.067	0.082	0.1	10.3174	0.016	0	12.5824	0	0	0	0	0	0	0	0	0	0	0	200	0	0	0	0	0	0	0	0	0	0	0	0	0	0	0	0	0	0	0	0	0
39058	2	1	9.49315	85	35	4	6	2	9	1.906	0.164	0.3	2.9588	0.032	0	5.3608	0	0	0	200	0	0	0	0	0	0	0	480	0	0	0	0	0	0	0	0	0	0	0	0	0	0	0	0	0	0	0	0	0
41030	2	2	7.32603	81	41	4	4	2	7	0.1685	0.153	0	4.6655	0	0	4.987	0	0	0	0	0	0	0	0	0	0	0	200	0	0	0	0	0	0	0	0	0	0	0	0	0	0	0	0	40	0	0	125	0
81411	2	2	10.3616	78	28	4	1	3	10	0.676269	0	0.042	14.1367	0.09225	0	14.9473	0	0	0	0	0	0	0	0	0	0	0	250	0	0	0	0	0	0	0	0	0	0	0	0	0	0	0	0	0	0	0	0	0
88044	2	1	11.0603	84	46	4	5	3	11	2.25	0.306	0	5.27	0	0	7.826	200	0	0	280	0	0	0	0	0	0	0	200	0	0	0	0	0	0	0	0	0	0	0	0	0	0	0	0	0	0	0	0	0
88101	2	2	9.31781	84	46	4	5	2	9	1.5112	0	0	12.4836	0	0	13.9948	200	0	40	0	0	0	0	0	0	0	0	400	0	0	0	0	0	0	0	0	0	0	0	0	40	0	0	0	0	0	0	0	0
2031	3	1	12.8301	62	33	2	3	3	12	6.088	0.209	0	9.6108	0.032	0	15.9398	0	0	0	0	0	0	0	0	0	500	0	0	0	0	0	0	0	0	420	0	0	0	0	0	0	0	0	0	30	0	0	125	0
3092	3	2	15.7726	73	39	3	3	4	15	0	0	0	0	0	0	0	0	0	0	0	0	0	0	0	0	0	0	0	0	0	0	0	0	0	0	0	0	0	0	0	0	0	0	0	0	0	0	125	0
27037	3	1	14.526	56	8	2	2	4	14	4.612	0.3978	0	9.381	0	0	14.3908	0	0	0	0	0	0	0	0	0	0	0	350	0	0	0	0	0	0	240	0	0	0	0	0	0	50	0	0	0	0	0	0	0
29040	3	1	17.4	58	8	2	2	4	17	0	0.0375	0	0	0	0	0.0375	0	0	0	0	0	0	0	0	0	0	0	150	0	0	0	0	0	0	0	0	0	0	0	0	0	0	0	0	0	0	0	125	0
38165	3	2	17.0877	114	17	3	2	4	17	0.030846	0	0.028	0	0	0	0.058846	0	0	0	0	0	0	0	0	0	0	0	0	0	0	0	0	0	0	0	0	0	0	0	0	10	0	0	0	0	0	0	0	0
88084	3	1	14.9151	84	46	4	5	4	14	14.1	0	0	4.84	0	0	18.94	0	0	0	0	0	0	0	0	0	0	0	0	0	0	0	0	0	0	0	0	0	0	0	0	0	0	0	0	0	0	0	0	0
3012	3	1	12.8137	44	39	1	3	3	12	0.337	0	0	9.331	0	0	9.668	0	0	0	80	0	0	0	0	0	0	0	500	0	0	0	0	0	0	0	0	0	0	0	0	0	0	0	0	0	0	0	0	0
3065	3	2	13.0795	73	39	3	3	3	13	2.8805	0.0375	0	9.61	0	0	12.528	0	0	0	0	0	0	0	0	0	0	0	0	0	0	0	0	0	0	0	0	0	0	0	0	0	0	0	0	0	0	0	0	0
5052	3	2	15.5452	83	48	4	3	4	15	0.886384	0.6875	0.112	3.619	0	0	5.30488	0	0	0	0	0	0	0	0	0	0	375	0	0	0	0	0	0	0	0	0	0	0	0	0	0	0	0	0	0	0	0	0	0
11039	3	1	15.6932	69	47	3	1	4	15	0.8395	0.246	0	9.3313	0.012	0	10.4288	0	0	0	0	0	0	0	0	0	0	0	340	0	0	0	0	0	0	0	0	0	0	0	0	0	0	0	0	0	0	0	0	0
13047	3	1	12.3562	101	2	1	1	3	12	0	0.459	0	1.395	0	0	1.854	0	0	0	0	0	0	0	0	0	0	0	0	0	0	0	0	0	0	0	0	0	0	0	0	0	0	0	0	0	0	0	0	0
15034	3	2	17.726	67	13	3	1	4	17	6.772	0.6	0	9.331	0	0	16.703	0	0	0	0	0	225	0	0	0	0	0	250	0	0	0	0	0	0	0	0	0	0	0	0	0	0	0	0	0	0	0	0	0
16008	3	1	12.5836	53	6	2	1	3	12	0.2696	0.042	0	8.8598	0	0	9.1714	0	0	0	0	0	0	0	0	0	0	0	200	0	0	0	0	0	0	0	0	0	0	0	0	0	0	0	0	0	0	0	0	0
16021	3	2	12.1918	53	6	2	1	3	12	1.2479	0.045	0	7.4648	0	0	8.7577	0	0	0	0	0	0	0	0	0	0	0	200	0	0	0	0	0	0	0	0	0	0	0	0	0	0	0	0	0	0	0	0	0
16074	3	2	17.9562	102	6	1	1	4	17	2.262	0.027	0	9.371	0	0	11.66	0	0	0	0	0	0	0	0	0	0	0	325	0	0	0	0	0	0	0	0	0	0	0	0	0	0	0	0	0	0	0	0	0
17031	3	2	12.8219	54	13	2	1	3	12	0.2022	0	10.506	5.5986	0	0	16.3068	0	0	0	0	0	0	0	0	0	0	0	0	0	200	0	0	0	0	0	0	0	0	0	0	0	0	0	0	30	0	0	0	0
31031	3	1	14.0521	20	8	1	2	4	14	0	0	0	7.688	0	0	7.688	0	0	0	0	0	0	0	0	0	0	0	500	0	0	0	0	0	0	0	0	0	0	0	0	0	0	0	0	0	0	0	0	0
33010	3	1	14.7342	79	8	4	2	4	14	0.05	0	0	9.65	0	0	9.7	0	0	0	0	0	0	0	0	0	0	0	250	0	0	0	0	0	0	0	0	0	0	0	0	0	0	0	0	0	0	0	0	0
33146	3	2	14.7644	79	8	4	2	4	14	0.81396	0.5355	0.28	13.9965	0	0	15.626	0	0	0	140	0	0	0	0	0	0	0	200	0	0	0	0	0	0	0	0	0	0	0	0	0	0	0	0	0	0	0	125	0
37041	3	2	17.4712	122	3	3	5	4	17	1.2555	0	0	13.9965	0	0	15.252	0	0	0	0	0	0	0	0	0	0	0	300	0	0	0	0	0	0	0	0	0	0	0	0	0	0	0	0	0	0	0	0	0
38002	3	2	13.3068	64	12	2	5	3	13	0	0	0	0	0	0	0	0	0	0	0	0	0	0	0	0	0	500	0	0	0	0	0	0	0	0	0	0	0	0	0	0	0	0	0	0	0	0	0	0
38195	3	1	14.8411	530	17	1	2	4	14	1.578	0.1	0	13.9965	0	0	15.6745	0	0	0	0	0	0	0	0	0	250	0	0	0	0	0	0	0	0	0	0	0	0	0	0	0	0	0	0	0	0	0	0	0
39001	3	2	15.9973	85	35	4	6	4	16	0.4615	0	0	9.47125	0.09225	0	10.025	0	0	0	0	0	0	0	0	0	0	0	200	0	0	0	0	0	0	0	0	0	0	0	0	0	0	0	0	0	0	0	0	0
85034	3	1	17.3562	119	29	3	4	4	17	2.25	0	0	0	0	0	2.25	225	0	0	150	0	0	0	0	0	0	0	0	0	0	0	0	0	0	0	0	0	0	0	0	0	0	0	0	0	0	0	0	0
2029	3	1	13.6356	62	33	2	3	3	13	1.7555	0.0075	0	14.0365	0	0	15.7995	0	0	0	0	0	0	0	0	0	0	0	700	0	0	0	0	0	0	0	0	0	0	0	0	0	0	0	0	0	0	0	0	0
2051	3	1	15.8795	62	33	2	3	4	15	3.45	0	0	0	0	0	3.45	0	0	0	0	0	0	0	0	0	0	0	250	0	0	0	0	0	0	0	0	0	0	0	0	40	0	0	0	20	0	0	0	0
2059	3	2	16.7589	62	33	2	3	4	16	2.733	0.08	0	0	0	0	2.813	0	0	0	0	0	0	0	0	0	0	0	0	0	0	0	0	0	0	0	0	0	0	0	0	0	0	0	0	0	0	0	125	0
2066	3	2	15.0082	500	33	3	3	4	15	2.7465	0.29	0	0.04	0	0	3.0765	0	0	0	0	0	0	0	0	0	175	0	100	0	0	0	0	0	0	0	0	0	0	0	0	60	0	0	0	0	0	0	125	0
3007	3	1	16.7644	44	39	1	3	4	16	0.337	0.0225	0	9.331	0	0	9.6905	0	0	0	0	0	0	0	0	0	0	0	500	0	0	0	0	0	0	0	0	0	0	0	0	0	0	0	0	0	0	0	0	0
3027	3	1	15.2055	44	39	1	3	4	15	5.8885	0	0	8.7155	0	0	14.604	0	0	0	0	0	90	0	0	0	0	0	250	0	0	0	0	0	0	0	0	0	0	0	0	0	0	0	0	0	0	0	0	0
3036	3	2	16.2767	44	39	1	3	4	16	2.28754	0.2	0.084	0.04	0	0	2.61154	0	0	0	0	0	0	0	0	0	0	0	200	0	0	0	0	0	0	0	0	0	0	0	0	0	0	0	0	0	0	0	0	0
3043	3	2	17.0493	44	39	1	3	4	17	0.991	0.6	0	12.433	0	0	14.024	0	0	0	0	0	180	0	0	0	0	0	250	0	0	0	0	0	0	0	0	0	0	0	0	0	0	0	0	0	0	0	0	0
3044	3	2	12.3753	44	39	1	3	3	12	2.4185	0	0	4.6655	0	0	7.084	0	0	0	0	0	0	0	0	0	0	0	250	0	0	0	0	0	0	0	0	0	0	0	0	0	0	0	0	0	0	0	250	0
3058	3	2	16.9397	44	39	1	3	4	16	0.674	0.0675	0	18.662	0	0	19.4035	0	0	0	0	0	0	0	0	0	0	0	450	0	0	0	0	0	0	0	0	0	0	0	0	0	0	0	0	20	0	0	0	0
3061	3	1	14.8712	44	39	1	3	4	14	2.03873	0.22	0.14	4.6655	0	0.228	7.29223	0	0	0	0	0	0	0	0	0	0	0	250	0	0	0	0	0	0	0	0	0	0	0	0	0	0	0	0	0	0	0	0	0
3068	3	2	12.9151	73	39	3	3	3	12	0.1685	0.0225	0	4.6655	0	0	4.8565	0	0	0	0	0	0	0	0	0	0	0	250	0	0	0	0	0	0	0	0	0	0	0	0	0	0	0	0	0	0	0	0	0
3069	3	2	17.4712	73	39	3	3	4	17	2.25	0.0375	0	9.61	0	0	11.8975	0	0	0	0	0	0	0	0	0	0	0	0	0	0	0	0	0	0	0	0	0	0	0	0	0	0	0	0	40	0	0	0	0
3072	3	2	14.4466	44	39	1	3	4	14	2.25	0	0	0	0	0	2.25	0	0	0	0	0	0	0	0	0	0	0	0	0	0	0	0	0	0	0	60	0	0	0	0	0	0	0	0	0	0	0	0	0
3074	3	2	13.3288	73	39	3	3	3	13	0.1685	0.015	0	4.6655	0	0	4.849	0	0	0	0	0	0	0	0	0	0	0	250	0	0	0	0	0	0	0	0	0	0	0	0	0	0	0	0	0	0	0	125	0
3081	3	2	17.989	73	39	3	3	4	17	2.587	0	0	9.331	0	0	11.918	0	0	0	0	0	0	0	0	0	0	200	260	0	0	0	0	0	0	0	0	0	0	0	0	0	0	0	0	40	0	0	0	0
3091	3	2	16.4274	73	39	3	3	4	16	1.437	0.1455	0	0.12	0	0	1.7025	0	0	0	0	0	0	0	0	0	0	650	0	0	0	0	0	0	0	0	0	0	0	0	0	0	0	0	0	30	0	0	0	0
3095	3	2	15.1123	118	39	1	3	4	15	0	0.03	0	0	0	0	0.03	0	0	0	0	0	0	0	0	0	250	0	0	0	0	0	0	0	0	0	0	0	0	0	0	0	0	0	0	0	0	0	0	0
3126	3	1	17.8438	73	39	3	3	4	17	2.666	0.1195	0	9.331	0	0	12.1165	0	0	0	0	0	0	0	0	0	0	0	300	0	0	0	0	0	0	0	0	0	0	0	0	0	0	0	0	20	0	0	0	0
3138	3	1	17.0164	73	39	3	3	4	17	8.3385	0	0	9.4705	0	0	17.809	0	0	0	0	0	0	0	0	0	0	0	300	0	0	0	0	0	0	0	0	0	0	0	0	0	0	0	0	0	0	0	0	0
3150	3	2	13.6301	44	39	1	3	3	13	1.4555	0.135	0	4.6655	0	0	6.256	0	0	0	0	0	0	0	0	0	0	0	250	0	0	0	0	0	0	0	0	0	0	0	0	0	0	0	0	40	0	0	0	0
3168	3	1	17.463	118	39	1	3	4	17	0.1685	0.0105	0	4.6655	0	0	4.8445	0	0	0	0	0	0	0	0	0	0	0	300	0	0	0	0	0	0	0	0	0	0	0	0	0	0	0	0	0	0	0	0	0
3178	3	1	13.5178	73	39	3	3	3	13	0.3555	0.1395	0	4.805	0	0	5.3	0	0	0	0	0	0	0	0	0	0	0	900	0	0	0	0	0	0	0	0	0	0	0	0	0	0	0	0	0	0	0	0	0
3183	3	2	15.5644	117	39	1	3	4	15	3.712	0.0975	0	9.331	0	0	13.1405	0	0	0	0	0	0	0	0	0	0	0	300	0	0	0	0	0	0	0	0	0	0	0	0	0	0	0	0	0	0	0	0	0
3184	3	2	14.1808	117	39	1	3	4	14	0.7985	0.03	0	18.8023	0.09225	0	19.723	0	0	0	0	0	0	0	0	0	0	0	550	0	0	0	0	0	0	0	0	0	0	0	0	0	0	0	0	0	0	0	0	0
3193	3	2	12.9342	117	39	1	3	3	12	2.2875	0.38	0	16.0645	0	0	18.732	0	0	0	0	0	0	0	0	0	0	0	600	0	0	0	0	0	0	0	0	0	0	0	0	0	0	0	0	0	0	0	125	0
4023	3	1	14.9753	420	39	3	3	4	14	0	0	0	0	0	0	0	0	0	0	0	0	0	0	0	0	0	0	200	0	0	0	0	0	0	0	0	0	0	0	0	0	0	0	0	0	0	0	0	0
4033	3	2	14.3315	422	39	1	3	4	14	0	0	0	9.61	0	0	9.61	0	0	0	0	0	0	0	0	0	0	0	220	0	0	0	0	0	0	0	0	0	0	0	0	0	0	0	0	0	0	0	0	0
4041	3	2	14.1068	429	39	1	3	4	14	0	0.03	0	6.727	0	0	6.757	0	0	0	0	0	0	0	0	0	0	0	0	0	0	0	0	0	0	0	0	0	0	0	0	0	0	0	0	0	0	0	125	0
5041	3	1	12.4685	83	48	4	3	3	12	2.0895	0.08	0	17.2413	0.09225	0	19.503	0	0	0	0	0	0	0	0	0	0	0	200	0	0	0	0	0	0	0	0	0	0	0	0	0	0	0	0	20	0	0	125	0
5067	3	1	16.8658	83	48	4	3	4	16	3.304	0.864	0	0	0	0	4.168	0	0	0	0	0	0	0	0	0	0	0	200	0	0	0	0	0	0	0	0	0	0	0	0	0	0	0	0	40	0	0	125	0
5072	3	2	16.3973	83	48	4	3	4	16	6.575	0.0375	0	8.4885	0	0	15.101	0	0	0	0	0	0	0	0	0	0	0	150	0	0	0	0	0	0	0	0	0	0	0	0	0	0	0	0	40	0	0	125	0
5082	3	1	17.8849	83	48	4	3	4	17	1.4	0.7025	0	14.81	0	0	16.9125	0	0	0	0	0	0	0	0	0	0	0	350	0	0	0	0	0	0	0	0	0	0	0	0	0	0	0	0	0	0	0	0	0
5232	3	2	13.7726	514	20	3	3	3	13	2.6055	0	0	13.9965	0	0	16.602	0	0	0	110	0	0	0	0	0	0	0	300	0	0	0	0	0	0	0	0	0	0	0	0	0	0	0	0	0	0	0	125	0
5239	3	2	13.0219	514	20	3	3	3	13	1.837	0.0225	0	9.331	0	0	11.1905	0	30	0	0	0	0	0	0	0	0	0	300	0	0	0	0	0	0	0	0	0	0	0	0	0	0	0	0	0	0	0	0	0
5261	3	1	17.5288	511	20	2	3	4	17	0	0.0225	0	0	0	0	0.0225	0	0	0	0	0	0	0	0	0	0	0	200	0	0	0	0	0	0	0	0	0	0	0	0	0	0	0	0	0	0	0	0	0
5263	3	1	17.9041	510	20	3	3	4	17	0.15423	0.03	0.14	2.883	0	0	3.20723	200	0	0	0	0	0	0	0	0	0	0	400	0	0	0	0	0	0	0	0	0	0	0	0	0	0	0	0	0	0	0	0	0
5328	3	2	16.5205	510	20	3	3	4	16	0.5	0	0	0.04	0	0	0.54	0	0	0	0	0	0	0	0	0	125	0	0	0	0	0	0	0	0	0	0	0	0	0	0	0	0	0	0	20	0	0	0	0
5357	3	1	17.4959	510	20	3	3	4	17	4.13685	0.15	0.21	6.6325	3.8045	0	14.9338	0	0	0	0	0	0	0	0	0	200	0	0	0	0	0	0	0	0	0	0	0	0	0	0	0	0	0	0	0	0	0	0	0
6015	3	1	16.5205	5	9	1	1	4	16	0.832	0.122	0	18.662	0	0	19.616	0	0	0	0	0	0	0	0	0	0	0	400	0	0	0	0	0	0	0	0	0	0	0	0	60	0	0	0	0	0	0	0	0
8020	3	2	17.5178	401	28	3	1	4	17	0.6	0	19.261	0	0	0	19.861	0	0	0	0	0	0	0	0	0	0	0	0	0	0	0	0	0	0	0	0	0	0	0	0	0	0	0	0	0	0	0	0	0
11095	3	2	14.6466	69	47	3	1	4	14	0.05	0	0	1.5125	0	0	1.5625	0	0	0	40	0	0	0	0	0	0	0	425	0	0	0	0	0	0	0	0	0	0	0	0	0	0	0	0	20	0	0	0	0
11126	3	2	16.3479	69	47	3	1	4	16	1.9986	0.665	0	13.1708	0.123	0	15.9574	0	0	0	0	0	0	0	0	0	0	0	325	0	0	0	0	0	0	0	0	0	0	0	0	40	0	0	0	0	0	0	0	0
13045	3	2	12.3534	101	2	1	1	3	12	2.25	0.459	0	1.395	0	0	4.104	0	0	0	0	0	0	0	0	0	0	0	0	0	0	0	0	0	0	0	0	0	0	0	0	0	0	0	0	0	0	0	0	0
13049	3	1	12.4904	101	2	1	1	3	12	0.825	0.474	0	16.337	0	0	17.636	0	0	0	0	0	0	0	0	0	0	0	200	0	0	0	0	0	0	0	0	0	0	0	0	70	0	0	0	0	0	0	0	0
14023	3	2	13.1288	67	13	3	1	3	13	1.5	0.306	0	2.48	0	0	4.286	0	0	0	0	0	0	0	0	0	500	0	0	0	0	0	0	0	0	0	0	0	0	0	0	0	0	0	0	0	0	0	0	0
14031	3	2	14.6658	203	13	1	1	4	14	0.674	0	0	18.662	0	0	19.336	0	0	0	0	0	0	0	0	0	0	200	0	0	0	0	0	0	0	0	0	0	0	0	0	0	0	0	0	0	0	0	0	0
14034	3	2	16.0082	137	13	2	1	4	16	2.124	0	0	0	0	0	2.124	0	0	0	0	0	0	0	0	0	0	0	200	0	0	0	0	0	0	0	0	0	0	0	0	0	0	0	0	0	0	0	0	0
14080	3	1	12.389	136	13	1	1	3	12	0.435	0	17.51	0.048	0	0	17.993	0	0	0	0	0	0	0	0	0	0	0	400	0	0	0	0	0	0	0	0	0	0	0	0	0	0	0	0	15	0	0	125	0
14081	3	1	13.1863	134	13	2	1	3	13	0.5255	0	0	16.1825	0	0	16.708	0	0	0	0	0	0	0	0	0	0	0	250	0	0	0	0	0	0	0	0	0	0	0	0	0	0	0	0	0	0	0	0	0
14083	3	1	16.0274	135	13	2	1	4	16	0	0.03	0	0	0	0	0.03	0	0	0	0	0	0	0	0	0	0	0	225	0	0	0	0	0	0	0	0	0	0	0	0	0	0	0	0	0	0	0	0	0
14090	3	1	15.274	204	13	1	1	4	15	0	0	0	1.24	0	0	1.24	0	0	0	0	0	0	0	0	0	0	0	0	0	0	0	0	0	0	0	0	0	0	0	0	0	0	0	0	0	0	0	0	0
14093	3	1	14.8986	134	13	2	1	4	14	2.70169	0	0.056	0	0	0	2.75769	0	0	0	0	0	0	0	0	0	0	0	0	0	0	0	0	0	0	0	0	0	0	0	0	0	100	0	0	0	0	0	0	0
15017	3	2	12.8301	135	13	2	1	3	12	0.086269	0.045	0.042	0.132	0	0	0.305269	0	0	0	0	0	0	0	0	0	0	0	250	0	0	0	0	0	0	0	0	0	0	0	0	0	0	0	0	0	0	0	0	0
15029	3	2	16.5616	212	13	1	1	4	16	0.077115	0	10.576	0	0	0	10.6531	0	0	0	0	0	0	0	0	0	0	0	250	0	0	0	0	0	0	0	0	0	0	0	0	0	0	0	0	0	0	0	0	0
15031	3	2	16.1452	134	13	2	1	4	16	3.0185	0.31811	0	9.3313	0.012	0	12.6799	0	0	0	0	0	0	0	0	0	200	0	0	0	0	0	0	0	0	120	0	0	0	0	0	0	0	0	0	0	0	0	0	0
15032	3	2	16.4932	67	13	3	1	4	16	0.5055	0.03	0	13.9965	0	0	14.532	0	0	0	0	0	0	0	0	0	200	0	0	0	0	0	0	0	0	0	0	0	0	0	0	60	0	0	0	0	0	0	0	0
15083	3	1	16.7452	135	13	2	1	4	16	0	0.03	0	0	0	0	0.03	0	0	0	125	0	0	0	0	0	0	0	250	0	0	0	0	0	0	0	0	0	0	0	0	0	0	0	0	0	0	0	0	0
15085	3	2	13.4575	67	13	3	1	3	13	0	0	0	0.075	0	0	0.075	0	0	0	0	0	0	0	0	0	0	0	500	0	0	0	0	0	0	0	0	0	0	0	0	0	0	0	0	50	0	0	0	0
16010	3	2	12.7671	53	6	2	1	3	12	2.212	0.006	0	9.331	0	0	11.549	0	0	0	0	0	0	0	0	0	0	0	200	0	0	0	0	0	0	0	0	0	0	0	0	0	0	0	0	25	0	0	0	0
16020	3	2	12.3644	53	6	2	1	3	12	1.5	0.015	0	7.688	0	0	9.203	0	0	0	135	0	0	0	0	0	0	0	0	0	0	0	0	0	0	0	0	0	0	0	0	0	0	0	0	0	0	0	0	0
16022	3	2	13.7781	53	6	2	1	3	13	0.1	0	0	0.08	0	0	0.18	0	0	0	0	0	0	0	0	0	0	0	820	0	0	0	0	0	0	120	0	0	0	0	0	0	0	0	0	30	0	0	0	0
16026	3	1	13.7041	53	6	2	1	3	13	0	0	0	2.79	0	0	2.79	0	0	0	0	0	0	0	0	0	0	0	0	0	0	0	0	0	0	0	0	0	0	0	0	50	0	0	0	0	0	0	0	0
16032	3	2	13.4137	53	6	2	1	3	13	1.047	0.027	0	13.9965	0	0	15.0705	0	0	0	0	0	0	0	0	0	0	0	400	0	0	0	0	0	0	0	0	0	0	0	0	0	0	0	0	0	0	30	0	0
16036	3	1	14.3781	53	6	2	1	4	14	1.4805	0.015	0	17.8405	0	0	19.336	0	0	0	0	0	0	0	0	0	0	0	175	0	0	0	0	0	0	0	0	0	0	0	0	0	0	0	0	0	0	0	0	0
16038	3	1	13.8767	53	6	2	1	3	13	0.05	0.009	0	1.435	0	0	1.494	0	0	0	0	0	0	0	0	0	0	0	150	0	0	0	0	0	0	0	0	0	0	0	0	0	0	0	0	0	0	0	0	0
16044	3	2	17.1288	102	6	1	1	4	17	2.53027	0.22722	0.042	9.331	0	0	12.1305	0	0	0	0	0	0	0	0	0	0	0	180	0	0	0	0	0	0	0	0	0	0	0	0	0	0	0	0	0	0	0	0	0
16069	3	2	16.4795	53	6	2	1	4	16	0.0385575	0.024	0.035	0	0	0	0.0975575	0	0	0	120	0	0	0	0	0	0	0	0	0	0	0	0	0	0	0	0	0	0	0	0	0	0	0	0	0	0	0	0	0
16091	3	2	15.7014	102	6	1	1	4	15	1.7325	0.0225	0	9.1125	0	0	10.8675	0	0	0	0	0	0	0	0	0	0	0	190	0	0	0	0	0	0	0	0	0	0	0	0	0	0	0	0	0	0	0	0	0
16093	3	2	14.1288	53	6	2	1	4	14	0.2859	0.015	0	7.9667	0	0	8.2676	0	0	0	0	0	145	0	0	0	0	0	315	0	0	0	0	0	0	0	0	0	0	0	0	50	0	0	0	0	0	0	0	0
17015	3	2	16.9644	54	13	2	1	4	16	0.85	1.4745	0	0.08	0	0	2.4045	0	0	0	0	0	0	0	0	0	0	0	200	0	200	0	0	0	0	0	0	0	0	0	0	0	0	0	0	0	0	0	125	0
17023	3	2	13.8932	54	13	2	1	3	13	0.807169	0.0225	0.042	16.1417	0	0	17.0134	0	0	0	0	0	0	0	0	0	0	0	200	0	0	0	0	0	0	0	0	0	0	0	0	0	0	0	0	0	0	0	0	0
17046	3	2	17.0466	54	13	2	1	4	17	1.0533	0	0	8.3979	0	0	9.4512	0	0	0	0	0	0	0	0	0	0	0	300	0	0	0	0	0	0	0	0	0	0	0	0	0	0	0	0	0	0	0	0	0
17047	3	2	17.8849	54	13	2	1	4	17	3.8747	0.8175	0	7.5606	0	0	12.2528	0	0	0	0	0	0	0	0	0	0	0	300	0	0	0	0	0	0	0	0	0	0	0	0	0	40	0	0	0	0	0	0	0
17055	3	2	13.9342	54	13	2	1	3	13	0.111692	0.0225	9.6865	5.806	0	0	15.6267	0	0	0	0	0	0	0	0	0	0	0	200	0	0	0	0	0	0	0	0	0	0	0	0	0	0	0	0	0	0	0	0	0
17062	3	1	14.0027	54	13	2	1	4	14	0.2359	0.021	0	6.5317	0	0	6.7886	0	0	0	0	0	0	0	0	0	0	0	200	0	0	0	0	0	0	0	0	0	0	0	0	0	0	0	0	0	0	0	0	0
17068	3	2	17.7726	54	13	2	1	4	17	0.297592	0.0255	0.056	9.4147	0	0	9.79379	0	0	0	0	0	0	0	0	0	0	0	200	0	0	0	0	0	0	0	0	0	0	0	0	0	0	0	0	0	0	0	0	0
21020	3	1	14.1616	140	41	1	4	4	14	8.73423	0.845	0.14	3.1	0	0	12.8192	0	0	0	0	0	0	0	0	0	0	0	200	0	0	0	0	0	0	0	0	0	0	0	0	0	0	0	0	0	0	0	0	0
21079	3	1	14.8164	234	41	2	4	4	14	3	0.03	0	0	0	0	3.03	0	0	0	0	0	0	0	0	0	0	0	450	0	0	0	0	0	0	0	0	0	0	0	0	0	0	0	0	0	0	0	0	0
22031	3	2	12.926	72	23	3	4	3	12	0.674	0	0	18.662	0	0	19.336	0	0	0	0	0	0	0	0	0	200	0	0	0	0	0	0	0	0	0	0	0	0	0	0	0	0	0	0	50	0	0	0	0
22056	3	1	17.4027	72	23	3	4	4	17	5.046	0	0	11.6055	0.372	0	17.0235	0	0	0	0	0	0	0	0	0	0	0	1000	0	0	0	0	0	0	0	0	0	0	0	0	0	0	0	0	0	0	0	0	0
22057	3	1	17.2384	72	23	3	4	4	17	1.43412	0.12	0.07	0.056	0	0	1.68012	0	0	0	0	0	0	0	0	0	0	0	350	0	0	0	0	0	0	0	0	0	0	0	0	0	0	0	0	0	0	0	0	0
22071	3	2	12.6192	104	4	1	4	3	12	1.4055	0	0	13.9965	0	0	15.402	0	0	0	0	0	0	0	0	0	0	0	250	0	0	0	0	0	0	0	0	0	0	0	0	0	0	0	0	40	0	0	0	0
22082	3	1	16.9397	104	4	1	4	4	16	3.64792	0.473	0.196	0	0	0	4.31692	0	0	0	0	0	0	0	0	0	0	0	0	0	0	0	0	0	0	0	0	0	0	0	0	0	0	0	0	0	0	0	0	0
24038	3	1	12.8904	60	23	2	4	3	12	0.6195	0.27	0	9.331	0	0	10.2205	0	0	0	0	0	125	0	0	0	0	0	500	0	0	0	0	0	0	0	0	0	0	0	0	0	0	0	0	0	0	0	0	0
24040	3	1	12.7945	60	23	2	4	3	12	0.2696	0	0	15.1528	0	0	15.4224	0	0	0	0	0	0	0	0	0	0	0	335	0	0	0	0	0	0	0	0	0	0	0	0	0	0	0	0	40	0	0	0	0
24044	3	1	13.4712	60	23	2	4	3	13	0	0.153	0	0	0	0	0.153	0	0	0	0	0	0	0	0	0	0	0	0	0	0	0	0	0	0	0	0	0	0	0	0	0	0	0	0	0	0	0	125	0
24049	3	2	13.1315	60	23	2	4	3	13	0.1685	0.306	0	4.6655	0	0	5.14	0	0	0	0	0	0	0	0	0	0	0	200	0	0	0	0	0	0	0	0	0	0	0	0	0	0	0	0	0	0	0	0	0
24055	3	1	15.263	60	23	2	4	4	15	8.35409	0.306	0.42	9.331	0	0	18.4111	0	0	0	0	0	0	0	0	0	0	0	200	0	0	0	0	0	0	0	0	0	0	0	0	0	0	0	0	0	0	0	0	0
25018	3	1	12.2658	120	41	2	4	3	12	6.83306	0.162	0.035	0	0	0	7.03006	0	0	0	0	100	0	0	0	0	0	0	400	0	0	0	0	0	0	0	0	0	0	0	0	0	0	0	0	0	0	0	0	0
25025	3	2	14.0849	120	41	2	4	4	14	0.337	0.015	0	9.331	0	0	9.683	0	0	0	0	0	0	0	0	0	0	0	200	0	0	0	0	0	0	0	0	0	0	0	0	0	0	0	0	0	0	0	0	0
25038	3	2	13.1123	120	41	2	4	3	13	5.6	0	8.755	0.04	0	0	14.395	0	0	0	0	0	0	0	0	0	0	0	100	0	0	0	0	0	0	0	0	0	0	0	0	0	0	0	0	0	0	0	0	0
25056	3	1	13.8082	120	41	2	4	3	13	0.337	0	0	9.331	0	0	9.668	0	0	0	250	0	0	0	0	0	0	0	250	0	0	0	0	0	0	0	0	0	0	0	0	0	0	0	0	0	0	0	0	0
25067	3	2	15.8685	120	41	2	4	4	15	15.9861	0.369	0.035	0	0.675	0	17.0651	0	0	0	0	0	0	0	0	0	0	0	150	0	0	0	0	0	0	0	0	0	0	0	0	0	0	0	0	30	0	0	0	0
25068	3	1	17.1425	120	41	2	4	4	17	1.387	0	0	9.331	0	0	10.718	0	0	0	0	125	0	0	0	0	0	0	200	0	0	0	0	0	0	0	0	0	0	0	0	30	0	0	0	0	0	0	0	0
26006	3	1	15.8027	28	7	1	2	4	15	0.95423	0.03	0.14	0.04	0	0.342	1.50623	0	0	0	0	0	0	0	0	0	0	0	200	0	0	0	0	0	0	0	0	0	0	0	0	0	0	0	0	0	0	0	0	0
26015	3	1	17.063	30	7	1	2	4	17	0.337	0	0	9.331	0	0	9.668	0	0	0	0	0	0	0	0	0	0	0	500	0	0	0	0	0	0	0	0	0	0	0	0	0	0	0	0	0	0	0	0	0
26016	3	1	12.3205	55	7	2	2	3	12	1.447	0.0225	0	9.815	0	0	11.2845	0	0	0	0	0	0	0	0	0	0	0	400	0	0	0	0	0	0	0	0	0	0	0	0	0	0	0	0	0	0	0	0	0
27022	3	2	12.474	56	8	2	2	3	12	0.75	0.015	0	0	0	0	0.765	0	0	0	0	0	0	0	0	0	0	0	0	0	0	0	0	0	0	0	0	0	0	0	0	0	10	10	0	0	0	0	0	0
27028	3	2	14.9973	56	8	2	2	4	15	0.337	0	0	9.331	0	0	9.668	0	0	0	0	0	0	0	0	0	200	0	0	0	0	0	0	0	0	0	0	0	0	0	0	0	0	0	0	0	0	0	0	0
27059	3	2	16.1616	56	8	2	2	4	16	1.05	0.0105	0	0	0	0	1.0605	0	0	0	0	0	0	0	0	0	250	0	0	0	0	0	0	0	0	0	0	0	0	0	0	15	0	0	0	0	0	0	0	0
27066	3	1	13.9616	56	8	2	2	3	13	4.307	0.3519	0	9.331	0	0	13.9899	0	0	0	0	0	0	0	0	0	0	0	200	0	0	0	0	0	0	0	0	0	0	0	0	0	0	0	0	0	0	0	125	0
27069	3	1	17.2521	56	8	2	2	4	17	2	0.015	0	0.214	0	0	2.229	0	0	0	0	0	0	0	0	0	0	0	250	0	0	0	0	0	0	0	0	0	0	0	0	0	0	0	0	0	0	0	0	0
28032	3	1	12.9233	57	8	2	2	3	12	1.46662	0.8665	0.07	16.5815	0	0	18.9846	0	0	0	0	0	0	0	0	0	0	0	200	0	0	0	0	0	0	0	0	0	0	0	0	0	0	0	0	20	0	0	0	0
28046	3	1	16.6685	71	8	3	2	4	16	7.6105	0.8415	0.182	1.86	0	0	10.494	0	0	0	0	0	0	0	0	0	0	0	250	0	0	0	0	0	0	0	0	0	0	0	0	0	0	0	0	0	0	0	0	0
28074	3	1	17.9479	71	8	3	2	4	17	0.05	0.135	0	0.04	0	0	0.225	0	0	0	0	0	0	0	0	0	0	240	0	0	0	0	0	0	0	0	0	0	0	0	0	0	0	0	0	0	0	0	0	0
28079	3	1	12.526	71	8	3	2	3	12	0.840115	0.7025	0.07	7.029	0	0	8.64161	0	0	0	0	0	0	0	0	0	0	0	0	0	0	0	0	0	0	0	0	0	0	0	0	0	0	0	0	0	0	0	0	0
29017	3	1	16.6849	58	8	2	2	4	16	0.847	0.015	0	9.26	0	0	10.122	0	0	0	0	0	0	0	0	0	0	0	200	0	0	0	0	0	0	0	0	0	0	0	0	0	0	0	0	0	0	0	0	0
29022	3	1	17.9452	58	8	2	2	4	17	0.01	0.03	0	0.008	0	0	0.048	0	0	0	0	0	0	0	0	0	200	0	20	0	0	0	0	0	0	0	0	0	0	0	0	0	0	0	0	0	0	0	125	0
29029	3	2	16.7863	58	8	2	2	4	16	1.9305	0.225	0	0	0	0	2.1555	0	0	0	0	0	0	0	0	0	0	0	0	0	0	0	0	0	0	0	0	0	0	0	0	0	0	0	0	0	0	0	0	0
30002	3	2	16.0384	25	43	1	2	4	16	2.0555	0	0	14.0365	0	0	16.092	0	0	0	0	0	0	0	0	0	0	0	240	0	0	0	0	0	0	0	0	0	0	0	0	0	0	0	0	0	0	0	0	0
30026	3	2	16.0521	21	43	1	2	4	16	0.586	0	0	9.6115	0.1845	0	10.382	0	0	0	125	0	0	0	0	0	0	0	400	0	0	0	0	0	0	0	0	0	0	0	0	0	0	0	0	0	0	0	125	0
30061	3	1	14.0795	24	43	1	2	4	14	3.89238	0.587	0.112	9.331	0	0	13.9224	0	0	0	0	0	0	0	0	0	0	0	200	0	0	0	0	0	0	0	0	0	0	0	0	0	0	0	0	0	0	0	625	0
33144	3	2	15.3205	79	8	4	2	4	15	4.209	0.9895	0	13.467	0	0	18.6655	0	0	0	0	0	0	0	0	0	0	0	200	0	0	0	0	0	0	0	0	0	0	0	0	0	0	0	0	0	0	0	0	0
33149	3	1	14.2877	79	8	4	2	4	14	0.414115	0.306	0.07	9.331	0	0	10.1211	0	0	0	0	0	0	0	0	0	300	0	0	0	0	0	0	0	0	0	0	0	0	0	0	40	0	0	0	0	0	0	0	0
34013	3	2	17.2959	80	50	4	2	4	17	4.66063	0.463	0.203	0	0	0	5.32663	0	0	0	0	0	300	0	0	0	0	0	400	0	0	0	0	0	0	0	0	0	0	0	0	0	50	0	0	0	0	0	0	0
34057	3	2	14.1589	80	50	4	2	4	14	5.26838	0.5325	0.112	7.688	0	0	13.6009	0	0	0	0	0	0	0	0	0	0	0	0	0	0	0	0	0	0	0	0	0	0	0	0	0	0	0	0	0	0	0	0	0
37020	3	1	16.3123	122	3	3	5	4	16	2.5325	0.09566	0	15.2365	0	0	17.8647	0	0	0	280	0	0	0	0	0	0	0	200	0	0	0	0	0	0	120	0	0	0	0	20	0	0	0	0	0	0	0	0	0
37027	3	1	13.0795	121	3	2	5	3	13	0.562	0.03	0	9.331	0	0	9.923	0	0	0	140	0	0	0	0	0	0	0	400	0	0	0	0	0	0	0	0	0	0	0	0	80	0	0	0	0	0	0	0	0
37031	3	2	16.6219	122	3	3	5	4	16	1.478	0	0.05	4.377	0	0	5.905	0	0	0	0	0	0	0	0	0	0	0	200	0	0	0	0	0	0	0	0	0	0	0	0	0	30	0	0	0	0	0	0	0
37049	3	1	17.5151	413	3	1	5	4	17	1.2333	0.459	0	8.649	0	0	10.3413	0	0	0	0	0	0	0	0	0	0	0	0	0	0	0	0	0	0	0	0	0	0	0	0	0	0	0	0	0	0	0	0	0
38019	3	1	14.6384	64	12	2	5	4	14	0.337	0.015	0	15.686	0	0	16.038	0	0	0	0	0	0	0	0	0	0	0	250	0	0	0	0	0	0	0	0	0	0	0	0	0	0	0	0	0	0	0	0	0
38031	3	1	13.0055	64	12	2	5	3	13	0.5445	0	0	9.56475	0.15375	0	10.263	0	0	0	0	0	0	0	0	0	0	0	450	0	0	0	0	0	0	0	0	0	0	0	0	0	0	0	0	0	0	0	125	0
38059	3	1	17.1836	64	12	2	5	4	17	3.732	0.324	0	14.6015	0	0	18.6575	0	0	0	0	0	0	0	0	0	0	0	250	0	0	0	0	0	0	0	0	0	0	0	0	0	0	0	0	0	0	0	0	0
38068	3	2	17.126	64	12	2	5	4	17	4.07396	0.313	0.098	0	0	0	4.48496	0	0	0	0	0	0	25	0	0	0	0	0	0	0	0	0	0	0	0	0	0	0	0	0	0	0	0	0	0	0	0	0	0
38098	3	1	16.0356	45	12	1	5	4	16	0	0	0	0	0	0	0	0	0	0	0	0	0	0	0	0	0	0	250	0	0	0	0	0	0	0	0	0	0	0	0	0	0	0	0	0	0	0	0	0
38149	3	2	13.0932	114	17	3	2	3	13	0.673134	0.0075	0.021	0.04	0	0	0.741634	0	0	0	0	0	0	0	0	0	0	150	0	0	0	0	0	0	0	0	0	0	0	0	0	65	0	0	0	0	0	0	0	0
38170	3	2	14.4	115	17	1	2	4	14	0	0	0	0	0	0	0	0	0	0	0	0	0	0	0	0	0	0	0	0	0	0	0	0	0	0	0	0	0	0	0	0	0	0	0	0	0	0	0	0
38171	3	2	17.2356	115	17	1	2	4	17	5.55	0	0	2.42	0	0	7.97	0	0	0	0	0	0	0	0	0	0	0	0	0	0	0	0	0	0	0	0	0	0	0	0	0	0	0	0	0	0	0	0	0
38196	3	2	14.9616	530	17	1	2	4	14	2.1975	0.1075	0	0	0	0	2.305	0	0	0	0	0	0	0	0	0	0	0	0	0	0	0	0	0	0	0	0	0	0	0	0	0	0	0	0	0	0	0	0	0
38208	3	2	14.1918	531	17	3	2	4	14	3	0.015	0	0	0	0	3.015	0	0	0	135	0	0	0	0	0	0	0	30	0	0	0	0	0	0	0	0	0	0	0	0	0	0	0	0	0	0	0	0	0
38211	3	1	14.2274	532	17	1	2	4	14	0.2916	0.041	0	7.465	0.008	0	7.8056	0	0	0	0	0	0	0	0	0	0	0	250	0	0	0	0	0	0	0	0	0	0	0	0	0	0	0	0	0	0	0	0	0
38212	3	2	15.5562	532	17	1	2	4	15	2.765	0.255	0	11.16	0	0	14.18	0	0	0	0	0	0	0	0	0	0	0	0	0	0	0	0	0	0	0	0	0	0	0	0	0	0	0	0	0	0	0	0	0
39009	3	2	15.0164	85	35	4	6	4	15	2.175	0	0	0.06	0	0	2.235	0	0	0	0	0	0	0	0	0	0	325	0	0	0	0	0	0	0	0	0	0	0	0	0	0	0	0	0	0	0	0	0	0
39014	3	1	16.7096	85	35	4	6	4	16	2.3635	0.3485	0.1	0.9868	0.032	0	3.8308	0	0	0	60	0	125	0	0	0	0	0	0	0	0	0	0	0	0	0	0	0	0	0	0	0	0	0	0	0	0	0	0	0
39016	3	1	14.9699	85	35	4	6	4	14	3.41411	0.015	0.07	9.331	0	0	12.8301	200	0	0	0	0	0	0	0	0	0	0	1200	0	0	0	0	0	0	0	0	0	0	0	0	0	0	0	0	0	0	0	0	0
39032	3	1	12.5562	85	35	4	6	3	12	3.20054	0.12	0.084	0	0	0	3.40454	0	0	0	0	0	0	0	0	0	0	0	200	0	0	0	0	0	0	0	0	0	0	0	60	0	0	0	0	0	0	0	0	0
39077	3	2	14.3233	52	35	1	6	4	14	4.887	0	0	9.371	0	0.285	14.543	0	0	0	0	0	0	0	0	0	0	270	0	0	0	0	0	0	0	0	0	0	0	0	0	0	0	0	0	0	0	0	0	0
40014	3	2	15.6164	77	38	3	6	4	15	2.6544	0	0	11.1972	0	0	13.8516	0	0	0	0	0	0	0	0	0	0	0	200	0	0	0	0	0	0	0	0	0	0	0	0	0	0	0	0	0	0	0	0	0
73005	3	2	16.8685	18	8	1	2	4	16	6.239	1.0525	3.312	8.543	0	0	19.1465	0	0	0	0	0	0	0	0	0	0	0	200	0	0	0	0	0	0	0	0	0	0	0	0	0	0	0	0	0	0	0	0	0
81226	3	2	17.8795	78	28	4	1	4	17	1.155	0.153	0	6.075	0	0	7.383	0	0	0	0	0	0	0	0	0	0	0	0	0	0	0	0	0	0	0	0	0	0	0	0	0	0	0	0	0	0	0	0	0
85016	3	2	12.3699	119	29	3	4	3	12	0.674	0	0	18.662	0	0	19.336	0	0	0	0	0	0	0	0	0	0	200	0	0	0	0	0	0	0	0	0	0	0	0	0	0	0	0	0	0	0	0	0	0
85025	3	2	17.2767	119	29	3	4	4	17	4.5	0.06	0	0	0	0	4.56	0	0	0	0	0	0	0	0	0	0	0	0	0	0	0	0	0	0	0	0	0	0	0	0	0	0	0	0	0	0	0	0	0
85029	3	1	16.0877	541	29	1	4	4	16	3.142	0.1265	0	0.0004	0.016	0	3.2849	0	0	0	0	0	0	0	0	0	0	0	0	0	0	0	0	0	0	0	0	0	0	0	0	0	0	0	0	0	0	0	0	0
85032	3	2	14.9041	119	29	3	4	4	14	2.587	0	0	9.331	0	0	11.918	0	0	0	0	0	0	0	0	0	0	0	200	0	0	0	0	0	0	60	0	0	0	0	0	0	0	0	0	0	0	0	0	0
85037	3	1	15.0904	119	29	3	4	4	15	1.188	0.0765	0	6.0753	0.012	0	7.3518	0	0	0	150	0	0	0	0	0	0	0	0	0	0	0	0	0	0	0	0	0	0	0	0	0	0	0	0	0	0	0	0	0
85044	3	1	13.2356	119	29	3	4	3	13	0.5392	0	0	14.9296	0	0	15.4688	0	0	0	0	0	0	0	0	0	0	0	200	0	0	0	0	0	0	0	0	0	0	0	0	0	0	0	0	0	0	0	0	0
87012	3	2	13.8521	217	30	1	5	3	13	5.22388	0.38	0.112	4.6655	0	0	10.3814	0	0	0	0	0	0	0	0	0	0	0	400	0	0	0	0	0	0	0	0	0	0	0	0	0	0	0	0	40	0	0	0	0
87017	3	2	14.8986	217	30	1	5	4	14	5.29473	0.38	0.14	12.7655	0	0	18.5802	0	0	0	0	0	0	0	0	0	0	200	0	0	0	0	0	0	0	0	0	0	0	0	0	0	0	0	0	0	0	0	0	0
87032	3	1	17.0027	217	30	1	5	4	17	3.216	2.31	0	12.408	0	0	17.934	0	0	0	0	0	0	0	0	0	0	0	200	0	0	0	0	0	0	0	0	0	0	0	0	40	0	0	0	0	0	0	250	0
87052	3	1	16.7425	224	30	1	5	4	16	0.6575	0.138	0	12.0448	0.15375	0	12.994	0	0	0	0	0	0	0	0	0	0	200	0	0	0	0	0	0	0	0	0	0	0	0	0	0	0	0	0	60	0	0	0	0
88034	3	1	14.7397	84	46	4	5	4	14	0	0	0	0	0	0	0	0	0	0	0	0	0	0	0	0	0	0	200	0	0	0	0	0	0	0	0	0	0	0	0	40	0	0	0	0	0	0	0	0
88039	3	1	13.274	84	46	4	5	3	13	4.118	0.015	0	13.77	0	0	17.903	0	0	0	0	0	0	0	0	0	0	200	0	0	0	0	0	0	0	0	0	0	0	0	0	50	0	0	0	0	0	0	0	0
88083	3	1	14.6603	84	46	4	5	4	14	2.25	0	0	0	0	0	2.25	0	0	0	0	0	0	0	0	0	0	0	200	0	0	0	0	0	0	0	0	0	0	0	0	0	0	0	0	0	0	0	125	0
2050	3	1	14.0082	62	33	2	3	4	14	3.45	0.015	0	0.025	0	0	3.49	0	0	0	0	0	0	0	0	0	0	0	400	0	0	0	0	0	0	0	0	0	0	0	0	0	0	0	0	0	0	0	0	0
3059	3	1	15.0658	44	39	1	3	4	15	1.244	0.2165	0	3.8444	0.016	0	5.3209	0	0	0	0	0	0	0	0	0	0	0	250	0	0	0	0	0	0	0	0	0	0	0	0	0	0	0	0	20	0	0	0	0
3142	3	1	15.9479	73	39	3	3	4	15	0.376	0.0075	0	5.98425	0.15375	0	6.5215	0	0	0	0	0	0	0	0	0	0	0	300	0	0	0	0	0	0	0	0	0	0	0	0	0	0	0	0	0	0	0	0	0
4001	3	2	17.5562	420	39	3	3	4	17	0.337	0.015	0	12.121	0	0	12.473	0	0	0	0	0	0	0	0	0	150	0	0	0	0	0	0	0	0	0	0	0	0	0	30	0	0	0	0	0	0	0	0	0
4024	3	1	13.537	426	39	1	3	3	13	9.92746	0.693	0.098	7.5875	0.2325	0	18.5385	0	0	0	100	0	0	0	0	0	0	0	400	0	0	0	0	0	0	0	0	0	0	0	0	0	0	50	0	0	50	0	0	0
4026	3	2	13.9315	420	39	3	3	3	13	0	0	0	2.325	0	0	2.325	0	0	0	0	0	0	0	0	0	0	200	0	0	0	0	0	0	0	0	0	0	0	0	0	0	0	0	0	0	0	0	0	0
5068	3	2	16.7233	83	48	4	3	4	16	0.337	0.0375	0	11.191	0	0	11.5655	0	0	0	0	0	0	0	0	0	0	0	375	0	0	0	0	0	0	0	0	0	0	0	0	0	0	0	0	0	0	0	0	0
5105	3	1	16.589	83	48	4	3	4	16	4.34838	0.256555	0.112	9.331	0	0	14.0479	0	0	0	0	0	0	0	0	0	200	0	0	0	0	0	0	0	0	0	0	0	0	0	0	0	0	0	0	0	0	0	125	0
5225	3	1	12.7014	510	20	3	3	3	12	7.30692	0.055	0.014	0	0.225	0	7.60092	0	0	0	0	0	0	0	0	0	0	0	500	0	0	0	0	0	0	0	0	0	0	0	0	0	0	0	0	0	0	0	125	0
5227	3	1	13.7616	510	20	3	3	3	13	0.763	0.6725	0	6.564	0	0	7.9995	0	0	0	0	0	0	0	0	0	0	0	700	0	0	0	0	0	30	120	0	0	0	0	0	0	0	0	0	0	0	0	125	0
5326	3	2	16.5397	510	20	3	3	4	16	0.6	0.015	0	0.05	0	0	0.665	0	0	0	110	0	0	0	0	0	200	0	0	0	0	0	0	0	0	0	0	0	0	0	0	0	0	0	0	0	0	0	0	0
5503	3	2	12.1589	75	1	3	3	3	12	2.929	1.256	0	14.501	0	0	18.686	0	0	0	0	0	0	0	0	0	0	250	200	0	0	0	0	0	0	120	0	0	0	0	0	0	0	0	0	0	0	0	0	0
8015	3	2	17.3151	403	28	3	1	4	17	0.05	0	0	0.04	0	0	0.09	0	0	0	0	0	0	0	0	0	150	0	0	0	0	0	0	0	0	0	0	0	0	0	0	0	0	0	0	0	0	0	0	0
11046	3	1	15.2904	68	47	3	1	4	15	2.105	0.6235	0	7.557	0	0	10.2855	0	0	0	0	0	0	0	0	0	400	0	0	0	0	0	0	0	0	0	0	0	0	0	0	80	0	0	0	0	0	0	0	0
11092	3	2	12.8932	69	47	3	1	3	12	1.633	0.6445	0	16.411	0	0	18.6885	0	0	0	0	0	0	0	0	0	0	0	300	0	0	0	0	0	0	0	0	0	0	0	0	0	0	0	0	20	0	0	0	0
13058	3	2	12.8658	101	2	1	1	3	12	0.885	0	0	0.048	0	0	0.933	200	0	0	0	0	0	0	0	0	0	0	600	0	0	200	0	0	0	0	0	0	0	0	0	0	0	0	0	0	0	0	0	0
13069	3	2	14.4767	101	2	1	1	4	14	0.214769	0.6885	0.042	4.6655	0	0	5.61077	0	0	0	0	0	0	0	0	0	200	0	0	0	0	200	0	0	0	0	0	0	0	0	0	0	0	0	0	0	0	0	125	0
14025	3	2	16.4877	67	13	3	1	4	16	2.29923	0.2765	0.14	0	0	0	2.71573	0	0	0	0	0	225	0	0	0	0	0	225	0	0	0	0	0	0	0	0	0	0	0	0	25	0	0	0	0	0	0	0	0
14079	3	1	13.1973	67	13	3	1	3	13	2.25	0.6885	0	1.29	0	0	4.2285	0	0	0	0	0	0	0	0	0	0	0	500	0	0	0	0	0	0	0	0	0	0	0	0	0	0	0	0	0	0	0	0	0
16011	3	2	12.411	53	6	2	1	3	12	1.809	0.766	0	13.467	0	0	16.042	0	0	0	0	0	0	0	0	0	0	0	560	0	0	0	0	0	0	0	0	0	0	0	0	0	0	0	0	30	0	0	0	0
16013	3	2	13.0137	53	6	2	1	3	13	0	0.0075	0	5.766	0	0	5.7735	0	0	0	0	0	0	0	0	0	0	0	200	0	0	0	0	0	0	0	0	0	0	0	0	0	0	0	0	0	0	50	0	0
16023	3	2	12.3397	53	6	2	1	3	12	5.23275	0.5055	0.028	11.1972	0	0	16.9634	0	0	0	0	0	0	0	0	0	360	0	0	0	0	0	0	0	0	240	0	0	0	0	0	0	0	0	0	0	0	0	0	0
16037	3	1	14.2192	53	6	2	1	4	14	0.8785	0.018	0	9.331	0	0	10.2275	0	0	0	0	0	0	0	0	0	175	0	0	0	0	0	0	0	0	0	0	0	0	0	0	0	0	0	0	0	0	0	0	0
16047	3	2	15.6767	53	6	2	1	4	15	0.674	0.009	0	18.662	0	0	19.345	0	0	0	0	0	0	0	0	0	0	0	400	0	0	0	0	0	0	0	0	0	0	0	0	0	0	0	0	30	0	0	0	0
16061	3	2	17.8849	103	6	1	1	4	17	0.337	0	0	9.786	0	0	10.123	0	0	0	0	0	0	0	0	0	0	0	180	0	0	0	0	0	0	0	0	0	0	0	0	0	60	0	0	15	0	0	0	0
17016	3	2	17.8247	54	13	2	1	4	17	0.083	0.0075	0	0.6185	0.0615	0	0.7705	0	0	0	0	0	0	0	0	0	0	0	700	0	0	0	0	0	0	0	0	0	0	0	0	0	0	0	0	0	0	0	0	0
17054	3	2	17.7562	54	13	2	1	4	17	0.15423	0.015	0.44	10.266	0	0	10.8752	0	0	0	0	0	0	0	0	0	0	0	0	0	0	0	0	0	0	0	0	0	0	0	0	0	0	40	0	0	0	0	0	0
17067	3	2	17.7589	54	13	2	1	4	17	3.52423	0.033	0.14	13.016	0	0	16.7132	0	0	0	0	0	0	0	0	0	0	0	180	0	0	0	0	0	0	0	0	0	0	0	0	0	0	0	0	0	0	0	0	0
17090	3	1	12.9233	54	13	2	1	3	12	0	0	0	0	0	0	0	0	0	0	0	0	0	0	0	0	0	0	0	0	0	0	0	0	0	60	0	0	0	0	0	0	0	0	0	0	0	0	125	0
21035	3	1	16.8274	81	41	4	4	4	16	1.0305	0	0	15.8565	0	0	16.887	0	0	0	0	0	0	0	0	0	0	0	200	0	0	0	0	0	0	0	0	0	0	0	0	0	0	0	0	0	0	0	0	0
22009	3	2	17.1753	72	23	3	4	4	17	6.40012	0.12	0.07	11.8775	0.372	0	18.8396	0	0	0	0	0	0	0	0	0	0	250	0	0	0	0	0	0	0	0	0	0	0	0	0	0	0	70	0	0	0	0	0	0
22026	3	2	12.2877	72	23	3	4	3	12	7.25812	0.215	0.07	9.66	0.372	0	17.5751	0	0	0	0	0	0	0	0	0	0	0	500	0	0	0	0	0	0	0	0	0	0	0	0	50	0	0	0	0	0	0	0	0
22070	3	2	12.3753	104	4	1	4	3	12	6.8474	0.40055	0.063	11.5975	0.372	0	19.2805	0	0	0	0	125	0	0	0	0	0	0	250	0	0	0	0	0	0	0	0	0	0	0	0	0	0	0	0	0	0	0	0	0
24045	3	1	12.2712	60	23	2	4	3	12	8.17802	0.612	0.07	6.138	0	0	14.998	0	0	0	0	0	0	0	0	0	0	0	200	0	0	0	0	0	0	0	0	0	0	0	0	0	0	0	0	40	0	0	0	0
24051	3	2	13.6959	60	23	2	4	3	13	0.1695	0.468	0	0	0	0	0.6375	0	0	0	135	0	0	0	0	0	0	0	200	0	0	0	0	0	0	0	0	0	0	0	0	0	0	0	0	0	0	0	0	0
27012	3	2	16.5836	56	8	2	2	4	16	3.2785	0.3648	0	4.7055	0	0	8.3488	0	0	0	0	0	0	0	0	0	0	0	275	0	0	0	0	0	0	0	0	0	0	0	0	0	30	0	0	0	0	0	125	0
27023	3	2	16.9014	56	8	2	2	4	16	1.075	0.084	0	0.203	0	0	1.362	0	0	0	0	0	0	0	0	0	425	0	0	0	0	0	0	0	0	0	0	0	0	0	5	0	0	0	0	0	0	0	0	0
27061	3	2	14.3753	56	8	2	2	4	14	0.45	0.015	0	5.766	0	0	6.231	0	0	0	0	0	0	0	0	0	0	0	400	0	0	0	0	0	0	0	0	0	0	0	0	0	0	0	0	0	0	0	0	0
27067	3	2	15.6822	56	8	2	2	4	15	0	0	0	0.012	0	0	0.012	0	0	0	0	0	0	0	0	0	200	0	0	0	0	0	0	0	0	0	0	0	0	0	0	20	0	0	0	0	0	0	0	0
28034	3	1	17.4849	57	8	2	2	4	17	0.125	0.0225	0	0.1	0	0	0.2475	0	0	0	0	0	0	0	0	0	0	0	365	0	0	0	0	0	0	0	0	0	0	0	0	80	0	0	0	0	0	0	0	0
29007	3	1	12.5836	58	8	2	2	3	12	2.0741	1.88813	0	7.755	0.0432	0	11.7604	0	0	0	0	0	0	0	0	0	0	0	0	0	0	0	0	0	0	0	0	0	0	0	0	0	0	45	0	0	0	0	0	0
29010	3	2	13.5918	58	8	2	2	3	13	2.04688	0.2497	0.112	1.70625	0.15375	0	4.26858	0	0	0	0	0	0	0	0	0	0	0	0	0	0	0	0	0	0	0	0	0	0	0	0	0	0	0	0	0	0	0	250	0
29043	3	1	17.3041	58	8	2	2	4	17	1.62338	0.0225	0.112	1.4725	0	0	3.23038	0	0	0	0	0	0	0	0	0	0	0	0	0	0	0	0	0	0	0	0	0	0	0	0	0	0	0	0	0	0	0	0	0
30032	3	1	13.6548	21	43	1	2	3	13	14.85	0.015	0	4.84	0	0	19.705	0	0	0	0	0	0	0	0	0	0	0	370	0	0	0	0	0	0	0	0	0	0	0	0	0	0	0	0	0	0	0	0	0
30039	3	1	17.7753	23	43	1	2	4	17	1.55	0.612	17.51	0.04	0	0	19.712	0	0	0	0	0	0	0	0	0	0	0	40	0	0	0	0	0	0	0	0	0	0	0	0	0	0	0	0	0	0	0	0	0
31018	3	2	16.8466	86	8	2	2	4	16	9.66	0.0375	0	2.904	0	0	12.6015	0	0	0	0	0	0	0	0	0	0	0	335	0	0	0	0	0	0	0	0	0	0	0	0	0	0	0	0	0	0	0	0	0
31019	3	1	13.4384	20	8	1	2	3	13	0.45	0.252	0	7.688	0	0	8.39	200	0	0	0	0	0	0	0	0	0	0	0	0	0	0	0	0	0	0	0	0	0	0	0	0	0	0	0	0	0	0	0	0
33027	3	1	16.3973	79	8	4	2	4	16	6.25211	0	0.07	0	0	0	6.32212	0	0	0	0	0	0	0	0	0	0	0	200	0	0	0	0	0	0	0	0	0	0	0	0	0	0	0	0	0	0	0	125	0
33085	3	1	12.1945	79	8	4	2	3	12	0	0.045	0	0.171	0	0	0.216	0	0	0	140	0	0	0	0	0	0	0	300	0	0	0	0	0	0	0	0	0	0	0	0	0	10	0	0	40	0	0	0	0
33152	3	1	12.5479	79	8	4	2	3	12	2.587	0	0	9.331	0	0	11.918	0	0	0	0	0	0	0	0	0	0	0	400	0	0	0	0	0	0	0	0	0	0	0	0	0	0	0	0	0	0	0	125	0
33156	3	2	16.7068	79	8	4	2	4	16	0.05	0	0	1.5125	0	0	1.5625	0	0	0	0	0	0	0	0	0	0	0	200	0	0	0	0	0	0	0	0	0	0	0	0	0	25	0	0	0	0	0	140	0
33170	3	1	17.5534	79	8	4	2	4	17	6.25211	0.0765	0.07	0	0	0	6.39862	0	0	0	0	0	0	0	0	0	0	0	0	0	0	0	0	0	0	0	0	0	0	0	0	40	0	0	0	0	0	0	0	0
34091	3	2	16.7644	80	50	4	2	4	16	2.385	0.9905	0	0.0002	0.008	0	3.3837	0	0	0	0	0	0	0	0	0	0	0	315	0	0	0	0	0	0	0	0	0	0	0	0	0	0	0	0	0	0	0	0	0
34093	3	1	16	80	50	4	2	4	16	0.02	0	0	0.016	0	0	0.036	200	0	0	0	0	0	0	0	0	200	0	0	0	0	0	0	0	0	0	0	0	0	0	0	0	0	0	0	0	0	0	125	0
35005	3	1	15.9699	70	8	3	2	4	15	6.05	0.105	0	4.845	0	0	11	0	0	0	0	0	0	0	0	0	800	0	100	0	0	0	0	0	0	0	0	0	0	0	0	0	0	0	0	0	0	0	250	0
35006	3	2	12.589	70	8	3	2	3	12	0.337	0.153	0	18.569	0	0	19.059	0	0	0	0	0	0	0	0	0	0	0	600	0	0	0	0	0	0	0	0	0	0	0	25	25	0	0	0	0	0	0	0	0
35050	3	1	11.9918	70	8	3	2	3	12	2.86	0.069	3.68	0	0.03	0	6.639	0	0	0	0	0	0	0	0	0	0	0	400	0	0	0	0	0	0	0	0	0	0	0	15	30	0	0	0	0	0	0	0	0
38006	3	2	12.4493	64	12	2	5	3	12	1.462	0.0075	0	9.331	0	0	10.8005	0	0	0	150	0	0	0	0	0	0	200	0	0	0	0	0	0	0	0	0	0	0	25	0	0	0	0	0	0	0	0	0	0
38158	3	1	16.2877	114	17	3	2	4	16	7.713	0	0.05	0.493	0	0.057	8.313	0	10	0	270	0	0	0	0	0	0	0	0	0	0	0	0	0	0	0	0	0	0	0	0	30	0	0	0	60	0	0	0	0
38174	3	1	13.5589	115	17	1	2	3	13	3.33242	0.0075	0.014	9.331	0	0	12.6849	0	0	0	0	0	0	0	0	0	0	0	240	0	0	0	0	0	0	0	0	0	0	0	0	0	0	0	0	0	0	0	0	0
38194	3	1	15.9068	530	17	1	2	4	15	1.6305	0	0	13.9965	0	0	15.627	0	0	0	0	0	0	0	0	0	0	0	200	0	0	0	0	0	0	0	0	0	0	0	0	0	0	0	0	0	0	0	0	0
39025	3	1	12.0548	85	35	4	6	3	12	4.5	0	0	0	0	0	4.5	0	0	0	0	0	0	0	0	0	0	0	200	0	0	0	0	0	0	0	0	0	0	0	0	0	0	0	0	0	0	0	0	0
39075	3	1	13.9342	52	35	1	6	3	13	18.0675	0.49422	0.084	0	0.675	0	19.3208	0	0	0	0	0	0	0	0	0	0	0	200	0	0	0	0	0	0	0	0	0	0	0	0	0	0	0	0	0	0	0	0	0
40002	3	2	14.4274	77	38	3	6	4	14	0.015423	0.015	0.014	0	0	0	0.044423	0	0	0	0	0	0	0	0	0	0	0	0	0	0	0	0	0	0	0	0	0	0	0	0	0	0	0	0	30	0	0	0	0
40005	3	2	15.5288	77	38	3	6	4	15	0.675	0	14.8835	1.4725	0	0	17.031	300	0	0	200	0	0	0	0	0	0	0	0	0	0	0	0	0	0	0	0	0	0	0	0	0	0	0	0	0	0	0	0	0
81230	3	2	17.6712	78	28	4	1	4	17	3.5695	0.2965	0	0.8877	0.028	0	4.7817	0	0	0	0	0	0	0	0	0	0	250	0	0	0	0	0	0	0	0	0	0	0	0	0	0	0	0	0	0	0	0	0	125
85017	3	2	17.0767	119	29	3	4	4	17	2.25	0	0	5.58	0	0	7.83	0	0	0	0	0	0	0	0	0	0	0	0	0	0	0	0	0	0	0	0	0	0	0	0	50	0	0	0	0	0	0	0	0
85023	3	1	16.3151	119	29	3	4	4	16	3.95485	0.459	0.028	4.86	0	0	9.30185	0	0	0	0	0	0	0	0	0	0	0	400	0	0	0	0	0	0	0	0	0	0	0	0	0	0	0	0	0	0	0	0	0
85031	3	1	14.611	119	29	3	4	4	14	1.5	0	0	2.325	0	0	3.825	0	0	0	150	0	0	0	0	0	0	0	200	0	0	0	0	0	0	0	0	0	0	50	0	0	0	0	0	0	0	0	0	0
87004	3	2	14.726	217	30	1	5	4	14	1.837	0	8.755	9.331	0	0	19.923	0	0	0	0	0	0	0	0	0	0	0	200	0	0	0	0	0	0	0	0	0	0	0	0	0	0	0	0	0	0	0	125	0
87014	3	2	14.1973	217	30	1	5	4	14	0	0.478	0	0	0	0	0.478	0	0	0	0	0	0	0	0	0	0	0	0	0	0	0	0	0	0	0	0	0	0	0	0	0	0	0	0	0	0	0	0	0
87035	3	2	14.6055	217	30	1	5	4	14	1.875	0.06	0	5.384	0	0	7.319	0	0	0	0	0	0	0	0	0	0	0	200	0	0	0	0	0	0	0	0	0	0	0	0	0	0	0	0	0	0	0	0	0
88076	3	2	17.9014	84	46	4	5	4	17	8.65	0.306	0	3.2	0	0	12.156	0	0	0	0	0	0	0	0	0	400	0	0	0	0	0	0	0	0	0	0	0	0	0	0	0	0	0	0	0	0	0	125	0
88087	3	1	14.6932	84	46	4	5	4	14	11.859	0.015	0	3.255	0	0	15.129	0	60	0	0	0	0	0	0	0	0	0	200	0	0	0	0	0	0	0	0	0	0	0	0	0	0	50	0	0	0	0	0	0
88104	3	1	17.8192	84	46	4	5	4	17	2.4522	0.015	0	5.5986	0	0	8.0658	0	0	0	0	0	0	0	0	0	0	0	200	0	0	0	0	0	0	0	0	0	0	0	0	0	0	0	0	0	0	0	0	0
5367	4	1	18.2795	514	20	3	3	5	18	1.84	0.015	0	9.642	0	0	11.497	0	0	0	0	0	0	0	0	0	0	0	200	0	0	0	0	0	0	0	0	0	0	0	0	0	0	0	0	0	0	0	0	0
13003	4	2	23.7123	101	2	1	1	5	23	0.5055	0.045	0	13.9965	0	0.171	14.718	0	0	0	0	0	0	0	0	0	400	0	0	0	0	0	0	0	0	0	0	0	0	0	0	0	0	0	0	0	0	0	0	0
13213	4	2	19.0795	101	2	1	1	5	19	1.15585	0	0.268	3.6	0	0	5.02385	200	0	0	0	0	0	0	0	0	0	0	0	0	0	0	0	0	0	0	0	0	0	0	0	0	0	0	0	0	0	0	0	0
34016	4	1	21.9918	80	50	4	2	5	22	10.8665	0.445165	0	0.04	0	0	11.3517	400	0	0	0	0	0	0	0	0	0	0	40	0	0	0	0	0	0	0	0	0	0	0	0	0	0	0	0	0	0	0	0	0
88042	4	2	24.874	84	46	4	5	5	24	1.5075	0	0.365	4.9525	0	0.1425	6.9675	0	0	0	0	0	0	0	0	0	0	0	600	0	0	0	0	0	0	0	0	0	0	0	0	0	0	0	0	0	0	0	0	0
88085	4	1	18.5562	84	46	4	5	5	18	3.559	0	0	6.885	0	0	10.444	0	0	0	140	0	0	0	0	0	0	0	200	0	0	0	0	0	0	0	0	0	0	0	0	30	0	0	0	0	0	0	0	0
2078	4	1	20.5288	500	33	3	3	5	20	0	0	0	0	0	0.4275	0.4275	0	0	0	0	0	0	0	0	0	0	0	0	0	0	0	0	0	0	0	0	0	0	0	0	0	0	0	0	0	0	0	0	0
2079	4	1	20.5315	62	33	2	3	5	20	1.96	0	0	0.12	0	0	2.08	0	0	0	0	0	0	0	0	0	0	0	600	0	0	0	0	0	0	0	0	0	0	0	0	0	0	0	0	0	0	0	0	0
2080	4	1	24.2575	62	33	2	3	5	24	15.405	0.615	0	0.16	0	0	16.18	0	0	0	0	0	0	0	0	0	0	0	0	0	0	0	0	0	0	0	0	0	0	0	0	0	0	0	0	50	0	0	0	0
3001	4	2	24.4055	44	39	1	3	5	24	1.14	0	0	7.908	0	0	9.048	0	0	0	0	0	0	0	0	0	0	0	250	0	0	0	0	0	0	0	0	0	0	0	25	0	0	0	0	0	0	0	0	0
3006	4	2	20.5836	44	39	1	3	5	20	0	0	0	0	0	0	0	0	0	0	0	0	0	0	0	0	0	0	0	0	0	0	0	0	0	0	0	0	0	0	0	0	0	0	0	0	0	0	250	0
3049	4	1	22.6082	44	39	1	3	5	22	2.587	0	0	11.501	0	0	14.088	0	0	0	0	0	0	0	0	0	250	0	0	0	0	0	0	0	0	0	0	0	0	0	0	0	0	0	0	0	0	0	0	0
3140	4	1	24.4329	73	39	3	3	5	24	15.7479	0.1425	0.112	0.04	0.675	0	16.7174	0	0	0	0	0	0	0	0	0	0	0	0	0	0	0	0	0	0	0	0	0	0	0	0	0	0	0	0	40	0	0	0	0
3177	4	1	20.7123	73	39	3	3	5	20	0.337	0	0	9.331	0	0	9.668	0	0	0	0	0	0	0	0	0	0	0	300	0	0	0	0	0	0	0	0	0	0	0	20	0	0	0	0	0	0	0	0	0
5258	4	1	21.0438	514	20	3	3	5	21	0	0.015	0	0	0	0	0.015	0	0	0	0	0	0	0	0	0	0	0	0	0	0	0	0	0	0	0	0	0	0	0	0	0	0	0	0	0	0	0	0	0
5270	4	1	21.2521	514	20	3	3	5	21	0.05	0.0225	0	0.04	0	0	0.1125	0	0	0	0	0	0	0	0	0	0	0	150	0	0	0	0	0	0	0	0	0	0	100	0	0	70	0	0	0	0	0	0	0
11010	4	1	18.0904	16	49	1	1	5	18	0	0	0	0	0	0	0	0	0	0	0	0	0	0	0	0	0	0	0	0	0	0	0	0	0	0	0	0	0	0	0	0	0	0	0	0	0	0	0	0
11059	4	1	23.5671	69	47	3	1	5	23	0	0.03	0	0	0	0	0.03	0	0	0	0	0	0	0	0	0	0	0	0	0	0	0	0	0	0	0	0	0	0	0	0	0	0	0	0	0	0	0	0	0
14111	4	1	19.9699	134	13	2	1	5	19	0.044	0.082	0	0.0004	0.016	0	0.1424	0	0	0	0	0	0	0	0	0	0	0	0	0	0	0	0	0	0	0	0	0	0	0	0	0	0	0	0	0	0	0	0	0
15041	4	2	19.4301	207	13	1	1	5	19	0.11	0.153	0	0.088	0	0	0.351	0	0	0	0	0	0	0	0	0	0	0	250	0	0	0	0	0	0	0	0	0	0	0	0	0	0	0	0	0	0	0	0	0
21009	4	1	20.7616	81	41	4	4	5	20	4.5	0.0225	0	0	0	0	4.5225	0	0	0	0	0	0	0	0	0	0	0	0	0	0	0	0	0	0	0	0	0	0	0	0	0	0	0	0	0	0	0	0	0
22055	4	2	18.2959	72	23	3	4	5	18	0.076692	0	0.056	4.817	0	0	4.94969	100	0	0	0	0	0	0	0	0	0	0	100	0	0	0	0	0	0	0	0	0	0	0	0	30	0	0	0	0	0	0	0	0
24059	4	2	21.9562	411	11	3	4	5	21	7.08346	0.17	0.44	8.166	0	0	15.8595	0	0	0	0	0	0	0	0	0	0	0	0	0	0	0	0	0	0	0	0	0	0	0	0	0	0	0	0	0	0	0	125	0
25002	4	2	22.0055	120	41	2	4	5	22	0.3	0.0225	0	0.24	0	0	0.5625	0	0	0	0	0	0	0	0	0	0	0	0	0	0	0	0	0	0	0	0	0	0	0	0	0	0	0	0	0	0	0	0	0
26035	4	2	19.8849	29	7	1	2	5	19	10.649	0.3615	0	0.04	0	0	11.0505	0	0	0	180	0	0	0	0	0	0	0	100	0	0	0	0	0	0	0	0	0	0	0	0	0	0	0	0	0	0	0	0	0
27026	4	2	23.1233	56	8	2	2	5	23	0.1	0.1326	0	2.963	0	0	3.1956	0	0	0	0	0	0	0	0	0	0	0	0	0	0	0	0	0	0	0	0	0	0	0	12	0	0	0	0	25	0	0	0	0
27039	4	1	18.8767	56	8	2	2	5	18	0.8	0	0	0.04	0	0	0.84	0	0	0	0	0	0	20	0	0	175	0	0	0	0	0	0	0	0	0	0	0	0	0	0	0	0	0	0	0	0	0	0	0
27054	4	1	20.5205	56	8	2	2	5	20	0.05	0.153	0.92	13.84	0	0	14.963	0	0	0	0	0	0	0	0	0	0	0	100	0	0	0	0	0	0	0	0	0	0	0	0	0	0	0	0	0	0	0	125	0
29038	4	1	24.7041	58	8	2	2	5	24	0.05	0	0	0.04	0	0	0.09	0	0	0	0	0	0	0	0	0	0	0	100	0	0	0	0	0	0	0	0	0	0	0	0	24	0	0	0	0	0	0	0	0
30003	4	2	20.8	25	43	1	2	5	20	0.9625	0.015	0	5.0625	0	0	6.04	0	50	0	0	0	0	0	0	0	0	0	0	0	0	0	0	0	0	0	0	0	0	0	0	15	0	0	0	0	0	0	0	0
30087	4	1	21.3671	106	43	3	2	5	21	0.225	0.153	0	0.18	0	0	0.558	0	0	0	0	0	0	0	0	0	0	0	0	0	0	0	0	0	0	0	0	0	0	0	0	0	0	0	0	0	0	0	0	0
31036	4	2	19.0329	20	8	1	2	5	19	0	0.03	0	0	0	0	0.03	200	0	0	0	0	0	0	0	0	0	0	0	0	0	0	0	0	0	0	0	0	0	0	0	0	0	0	0	0	0	0	0	0
33061	4	2	22.6822	79	8	4	2	5	22	0.62696	0.03	0.28	8.6295	0	0	9.56646	0	0	0	100	0	0	0	0	0	200	400	240	0	0	0	0	0	60	0	0	0	0	0	0	0	0	0	0	0	0	0	0	0
34031	4	1	22.9096	80	50	4	2	5	22	0.024	0.024	0	0	0.018	0	0.066	0	0	0	0	0	0	0	0	0	0	0	400	0	0	0	0	0	0	0	0	0	0	0	0	0	0	0	0	0	0	0	0	0
34034	4	1	19.6658	80	50	4	2	5	19	1.7022	0.0075	0.2	9.6836	0	0	11.5933	0	0	0	0	0	0	0	0	0	0	0	200	0	0	0	0	0	5	0	0	0	0	0	0	0	0	0	0	0	0	0	0	0
34036	4	2	22.3315	80	50	4	2	5	22	8.8822	1.099	0	5.6786	0	0	15.6598	0	0	0	0	0	0	0	0	0	0	0	325	0	0	0	0	0	0	0	0	0	0	0	0	0	0	0	0	20	0	0	0	0
34038	4	2	18.3315	80	50	4	2	5	18	0	0.6885	0	9.61	0	0	10.2985	0	0	0	0	0	0	0	0	0	0	0	0	0	0	0	0	0	0	0	0	0	0	0	0	0	0	0	0	0	0	0	0	0
35064	4	1	22.7233	79	8	4	2	5	22	6.775	0.3825	0	3.893	0	0	11.0505	0	0	0	0	0	0	0	0	0	0	0	0	0	0	0	0	0	0	0	0	0	0	0	0	0	0	30	0	30	0	0	0	0
35069	4	1	18.6301	79	8	4	2	5	18	0.1	0.153	0	0.08	0	0	0.333	0	0	0	0	0	0	0	0	0	0	0	0	0	0	0	0	0	0	0	0	0	0	0	0	0	0	0	0	20	0	0	0	0
36024	4	2	23.0055	84	46	4	5	5	23	1.4632	0	0	0.267	0.123	0	1.8532	0	0	0	0	0	0	0	0	0	0	150	0	0	0	0	0	0	0	0	0	0	0	0	0	0	0	0	0	0	0	0	0	0
38087	4	2	18.8192	64	12	2	5	5	18	0.030846	0	0.028	0	0	0	0.058846	0	0	0	0	0	0	0	0	0	0	0	0	0	0	0	0	0	0	0	0	0	0	0	0	0	0	0	0	0	0	0	0	0
81124	4	2	21.3671	78	28	4	1	5	21	0.75	0	0	0	0	0	0.75	0	0	0	0	0	0	0	0	0	0	0	0	0	0	0	0	0	0	0	0	0	0	0	0	0	0	0	0	15	0	0	0	0
81422	4	2	22.9918	78	28	4	1	5	23	2.574	0.255	0	3.1	0	0	5.929	0	0	0	0	0	0	0	0	0	0	0	250	0	0	0	0	0	0	0	0	0	0	0	0	0	0	0	0	0	0	0	0	0
81519	4	2	18.3753	78	28	4	1	5	18	2.574	0.255	0	3.1	0	0	5.929	0	0	0	0	0	0	0	0	0	0	0	250	0	0	0	0	0	0	0	0	0	0	0	0	0	0	0	0	0	0	0	0	0
85026	4	2	20.2767	119	29	3	4	5	20	3	0	0	0	0	0	3	0	0	0	0	0	0	0	0	0	0	0	0	0	0	0	0	0	0	60	0	0	0	0	0	0	0	0	0	0	0	0	0	0
85040	4	1	24.9178	119	29	3	4	5	24	1.544	0.082	0	0.0004	0.016	0	1.6424	0	0	0	0	0	0	0	0	0	0	0	0	0	0	0	0	0	0	0	0	0	0	0	0	0	0	0	0	0	0	0	250	0
87024	4	1	18.9753	219	30	1	5	5	18	6.175	0.03	0	5.766	0	0	11.971	200	0	0	0	0	0	0	0	0	0	0	0	0	0	0	0	0	0	0	0	0	0	0	0	0	0	0	0	0	0	0	0	0
87055	4	2	21.611	230	30	3	5	5	21	0.05	0.015	0	0.04	0	0	0.105	0	0	0	0	0	0	0	0	0	0	0	0	0	0	0	0	0	0	0	0	0	0	0	0	60	0	0	0	0	0	0	0	0
88036	4	2	23.1836	129	46	1	5	5	23	3.1	0.153	0.36	5.48	0	0	9.093	0	0	0	0	0	0	0	0	0	0	0	0	0	0	0	0	0	0	0	0	0	0	0	0	0	0	0	0	0	0	0	0	0
2069	4	1	20.5726	62	33	2	3	5	20	0.95	0	0	0.81	0	0	1.76	0	0	0	125	0	0	0	0	0	0	0	1750	0	0	0	0	0	0	0	0	0	0	0	0	0	0	0	0	0	0	0	0	0
2071	4	1	19.5808	62	33	2	3	5	19	3	0.03	0	1.24	0	0	4.27	0	0	0	0	0	0	0	0	0	0	0	200	0	0	0	0	0	0	0	0	0	0	0	0	0	0	0	0	0	0	0	0	0
2074	4	1	24.3863	504	33	1	3	5	24	9.96	0.1575	0	0.05	0.45	0	10.6175	0	0	0	0	0	100	0	0	0	0	0	200	0	0	0	0	0	0	0	0	0	0	0	0	40	0	0	0	0	0	0	125	0
2097	4	2	19.8137	62	33	2	3	5	19	12.587	0.108	0	0	0	0	12.695	0	0	0	0	0	0	0	0	0	0	0	200	0	0	0	0	0	0	0	0	0	0	0	0	0	0	0	0	0	0	0	0	0
2101	4	2	20.6247	62	33	2	3	5	20	2.4	0	0	0.12	0	0	2.52	0	0	0	0	0	0	0	0	0	0	0	0	0	0	0	0	0	0	0	0	0	0	0	0	0	0	0	0	0	0	0	0	0
2117	4	2	19.9644	500	33	3	3	5	19	1.512	0	0	0.0096	0	0	1.5216	0	0	0	0	0	0	0	0	0	0	200	0	0	0	0	0	0	0	0	0	0	0	0	0	0	0	0	0	0	0	0	0	0
3011	4	1	23.3342	44	39	1	3	5	23	0.1	0.0225	0	0.08	0	0	0.2025	0	0	0	0	0	0	0	0	0	0	0	400	0	0	0	0	0	0	0	0	0	0	0	0	0	0	0	0	0	0	0	0	0
3042	4	1	19.2712	44	39	1	3	5	19	2.294	0.082	0	0.0004	0.016	0	2.3924	0	0	0	0	0	0	0	0	0	0	0	0	0	0	0	0	0	0	0	0	0	0	0	0	0	0	0	0	0	0	0	0	0
3051	4	1	20.5973	44	39	1	3	5	20	2.4185	0	0	4.6655	0	0	7.084	0	0	0	0	0	90	0	0	0	0	0	250	0	0	0	0	0	0	0	0	0	0	0	0	0	0	0	0	0	0	0	0	0
3076	4	2	19.8219	73	39	3	3	5	19	0	0.045	0	0	0	0	0.045	0	0	0	0	0	0	0	0	0	0	0	0	0	0	0	0	0	0	0	0	0	0	0	0	0	0	0	0	0	0	0	0	0
3078	4	2	18.1479	73	39	3	3	5	18	1.0135	0.087	0	0.0403	0.012	0	1.1528	0	0	0	0	0	0	0	0	0	0	250	0	0	0	0	0	0	0	0	0	0	0	0	0	0	0	0	0	0	0	0	0	0
3094	4	2	18.6493	118	39	1	3	5	18	3.25054	0.11	0.084	0.04	0	0	3.48454	0	0	0	0	0	0	0	0	0	0	200	0	0	0	0	0	0	0	0	0	0	0	0	0	0	0	0	0	20	0	0	0	0
3097	4	2	20.9178	73	39	3	3	5	20	2.3	0.063	0	0.04	0	0	2.403	0	0	0	0	0	0	0	0	0	0	0	200	0	0	0	0	0	0	0	0	0	0	0	0	0	0	0	0	0	0	0	125	0
3112	4	1	23.4219	73	39	3	3	5	23	3.816	0.2055	0	0.0006	0.024	0	4.0461	0	0	0	0	0	0	0	0	0	0	0	0	0	0	0	0	0	0	0	0	0	0	0	0	0	0	0	0	0	0	0	0	0
3134	4	1	18.474	73	39	3	3	5	18	0.8965	0.6705	0	4.7055	0	0	6.2725	0	0	0	0	0	0	0	0	0	0	0	350	0	0	0	0	0	0	0	0	0	0	0	0	0	0	0	0	0	0	0	0	0
3143	4	1	19.1315	73	39	3	3	5	19	2.98206	0.06	0.035	0.04	0	0	3.11706	0	0	0	0	0	0	0	0	0	0	0	250	0	0	0	0	0	0	0	0	0	0	0	0	0	0	0	0	10	0	0	0	0
3175	4	1	22.2932	73	39	3	3	5	22	2.5185	0.0375	0	4.7455	0	0	7.3015	0	0	0	125	0	0	0	0	0	0	0	450	0	0	0	0	0	0	0	0	0	0	0	0	0	0	0	0	0	0	0	0	0
3180	4	1	23.0904	73	39	3	3	5	23	2.25	0.045	0	0	0	0	2.295	0	0	0	0	0	0	0	0	0	0	0	0	0	0	0	0	0	0	0	0	0	0	0	0	0	0	0	0	0	0	0	0	0
4007	4	2	18.1808	420	39	3	3	5	18	0.5055	0.03	0	13.9965	0	0	14.532	0	0	0	0	0	0	0	0	0	0	0	400	0	0	0	0	0	0	120	0	0	0	0	0	0	30	0	0	30	0	0	0	0
4020	4	1	21.9205	420	39	3	3	5	21	19.76	0.06	0	0.04	0	0	19.86	0	0	0	0	0	0	0	0	0	0	0	100	0	0	0	0	0	0	0	0	0	0	0	0	0	0	0	0	0	0	0	0	0
5112	4	1	20.7808	83	48	4	3	5	20	3.7	0.075	0	0.08	0	0	3.855	0	0	0	0	0	100	0	0	0	0	0	625	0	0	0	0	0	0	0	0	0	0	0	0	0	0	0	0	0	0	0	125	0
5116	4	1	22.3589	83	48	4	3	5	22	12.191	0.95	0	5.37	0	0	18.511	0	0	0	190	0	0	0	0	0	0	250	0	0	0	0	0	0	0	0	0	0	0	0	0	0	0	0	0	0	0	0	125	0
5121	4	2	20.2055	83	48	4	3	5	20	10.759	0.8804	0.21	1.32	0	0	13.1694	0	0	0	0	0	0	0	0	0	250	0	0	0	0	0	0	0	0	0	0	0	0	0	0	0	0	0	0	0	0	0	0	0
5123	4	2	20.874	83	48	4	3	5	20	2.6345	0.287	0	0.0414	0.056	0	3.0189	0	0	0	0	0	0	0	0	0	0	200	105	0	0	0	0	0	0	0	0	0	0	0	0	0	0	0	0	0	0	0	125	0
5253	4	2	22.1014	514	20	3	3	5	22	3.14923	0.2375	0.14	0.08	0	0	3.60673	0	0	0	0	0	110	0	0	0	0	0	130	0	0	0	0	0	0	0	0	0	0	0	0	0	0	0	0	0	0	0	375	0
5262	4	1	22.2082	511	20	2	3	5	22	18.15	0.03	0	0	0	0	18.18	0	0	0	0	0	0	0	0	0	0	0	400	0	0	0	0	0	0	0	0	0	0	0	0	0	0	0	0	0	0	0	250	0
5280	4	1	24.2137	522	20	2	3	5	24	0.6985	0.76	0	0.0007	0.028	0	1.4872	0	0	0	0	0	0	0	0	0	0	0	0	0	0	0	0	0	0	0	0	0	0	0	0	0	0	0	0	0	0	0	0	0
5334	4	2	20.0603	510	20	3	3	5	20	12.41	0.03	0	5.484	0	0	17.924	0	0	0	0	0	0	0	0	0	0	200	80	0	0	0	0	0	0	0	0	0	0	0	0	0	0	0	0	0	0	0	125	0
5342	4	2	18.6795	515	20	2	3	5	18	0.09	0.015	0	0.072	0	0	0.177	0	0	0	0	0	0	0	0	0	0	120	100	0	0	0	0	0	0	0	0	0	0	0	0	0	0	0	0	0	0	0	0	0
5354	4	1	19.5151	510	20	3	3	5	19	0.03	0	0	0.024	0	0	0.054	0	0	0	0	0	0	0	0	0	0	0	200	0	0	0	0	0	0	120	0	0	0	0	0	0	0	0	0	0	0	0	0	0
5358	4	1	21.9123	510	20	3	3	5	21	0.858	0.095	0.088	2.145	0	0	3.186	0	30	0	0	0	100	0	0	0	0	0	0	0	0	0	0	0	0	0	0	0	0	0	0	0	0	0	0	0	0	0	250	0
5360	4	1	23.8849	510	20	3	3	5	23	4.48	0.667	0.16	2.4	0	0	7.707	0	0	0	0	0	0	0	0	0	0	0	0	0	0	0	0	0	0	0	0	0	0	0	0	50	0	0	0	0	0	0	0	0
5364	4	1	18.6082	510	20	3	3	5	18	0	0.0225	0	0.84	0	0	0.8625	0	0	0	0	0	0	0	0	0	0	400	0	0	0	0	0	0	0	0	0	0	0	0	0	0	0	0	0	0	0	0	0	0
5509	4	2	24.5123	523	9	1	1	5	24	8.84461	0.6695	0.07	0.04	0	0	9.62411	0	0	0	0	0	0	0	0	0	0	300	0	0	0	0	0	0	0	0	0	0	0	0	0	0	0	0	0	20	0	0	0	0
6013	4	2	24.8904	5	9	1	1	5	24	0.2825	0.3225	0	1.55	0	0	2.155	0	0	0	0	0	0	0	0	0	0	0	200	0	0	0	0	0	0	0	0	0	0	0	0	0	0	0	0	0	0	0	0	0
6018	4	1	20.1342	5	9	1	1	5	20	0.1	0.03	0	0.08	0	0	0.21	0	0	0	0	0	0	0	0	0	0	0	250	0	0	0	0	0	0	0	0	0	0	0	0	0	0	0	0	0	0	0	0	0
8009	4	1	21.4137	78	28	4	1	5	21	2.35	0	0.0924	1.466	0	0	3.9084	0	0	0	0	0	0	0	0	0	100	0	0	0	0	0	0	0	0	0	0	0	0	0	0	0	0	100	0	0	0	0	0	0
8014	4	1	23.1945	402	28	1	1	5	23	1.5	0.06	0.824	12.36	0	0	14.744	0	0	0	0	0	0	0	0	0	0	0	0	0	0	0	0	0	0	0	0	0	0	0	0	0	0	0	0	0	0	0	0	0
8023	4	1	19.6548	403	28	3	1	5	19	2.4185	0	0	6.0605	0	0	8.479	0	0	0	0	0	0	0	0	0	0	0	200	0	0	0	0	0	0	0	0	0	0	0	0	0	0	0	0	0	0	0	0	0
8024	4	2	19.9233	404	28	3	1	5	19	3.214	3.054	0	0.04	0	0	6.308	0	0	0	0	0	0	0	0	0	0	0	100	0	0	0	0	0	0	0	0	0	0	0	0	0	0	0	0	0	0	0	0	0
8030	4	1	21.2466	403	28	3	1	5	21	4.087	0	0	9.331	0	0	13.418	0	0	0	0	0	0	0	0	0	0	250	0	0	0	0	0	0	0	0	0	0	0	0	0	0	0	0	0	0	0	0	0	0
8033	4	2	21.1288	404	28	3	1	5	21	2.195	0.26	0	0.04	0	0	2.495	0	0	0	0	0	0	0	0	0	0	0	150	0	0	0	0	0	0	0	0	0	0	0	0	0	0	0	0	0	0	0	0	0
8034	4	1	18.9342	403	28	3	1	5	18	0.505	0.492	0	0.0806	0.024	0	1.1016	0	0	0	0	0	0	0	0	0	0	0	300	0	0	0	0	0	0	0	0	0	0	0	0	0	0	0	0	0	0	0	0	0
8036	4	2	23.3562	403	28	3	1	5	23	2.25	0.0375	0	0	0	0	2.2875	0	0	0	0	0	0	0	0	0	500	0	0	0	0	0	0	0	0	0	0	0	0	0	0	0	0	0	0	0	0	0	0	0
8041	4	2	21.1123	401	28	3	1	5	21	2.616	2.31	0	12.408	0	0	17.334	0	0	0	0	0	0	0	0	0	0	0	0	0	0	0	0	0	0	0	0	0	0	0	0	50	0	0	0	0	0	0	0	0
8049	4	2	21.7973	401	28	3	1	5	21	0.208	0.092	0	0.04	0	0	0.34	0	0	0	110	0	0	0	0	0	0	0	150	0	0	0	0	0	0	0	0	0	0	0	0	0	0	0	0	0	0	0	0	0
11001	4	2	23.6466	16	49	1	1	5	23	0.399845	0.03	0.234	5.3735	0	0	6.03735	0	0	0	0	0	0	0	0	0	200	0	0	0	0	0	0	0	0	0	0	0	0	0	0	0	0	0	0	0	0	5	0	0
11009	4	1	22.6438	16	49	1	1	5	22	0.02	0	5.704	0.016	0	0	5.74	0	0	0	0	0	0	0	0	0	500	0	0	0	0	0	0	0	0	0	0	0	0	0	0	0	0	0	0	0	0	80	0	0
11029	4	2	23.5205	69	47	3	1	5	23	0.5805	0	0	14.0565	0	0	14.637	0	0	0	0	0	0	0	0	0	0	0	450	0	0	0	0	0	0	0	0	0	0	0	0	0	0	0	0	0	0	0	0	0
11049	4	2	18.1315	69	47	3	1	5	18	1.61	0.03	0	0.056	0	0	1.696	0	0	0	0	0	0	0	0	0	0	0	550	0	0	0	0	0	0	0	0	0	0	0	0	0	0	0	0	0	0	0	125	0
11071	4	1	23.726	69	47	3	1	5	23	3.50006	0.22022	0.035	0.008	0	0	3.76328	0	0	160	0	0	0	0	0	0	0	0	225	0	0	0	0	0	0	0	0	0	0	0	0	0	0	0	0	20	0	0	0	0
11115	4	1	25.2548	69	47	3	1	5	24	0.1	0.0525	0	0.08	0	0	0.2325	0	0	0	0	0	0	0	0	0	0	0	300	0	0	0	0	0	0	0	0	0	0	0	0	20	0	0	0	0	0	0	0	0
11120	4	1	23.5808	69	47	3	1	5	23	12.5815	0.22	0	0.2935	0.0615	0	13.1565	0	0	0	0	0	0	0	0	0	300	0	0	0	0	0	0	0	0	0	0	0	0	0	0	0	0	0	0	0	0	0	0	0
13036	4	2	22.4466	101	2	1	1	5	22	1.8195	0.2025	0.144	2.2088	0.032	0	4.4068	0	0	0	125	0	0	20	0	0	0	0	0	0	0	0	0	0	0	0	0	0	0	0	0	0	0	0	0	0	0	0	0	0
13039	4	2	21.1151	101	2	1	1	5	21	0.12	0.306	0	9.706	0	0	10.132	0	0	0	0	0	0	0	0	0	0	200	0	0	0	0	0	0	0	0	0	0	0	0	0	0	0	0	0	0	0	0	0	0
14101	4	1	20.5425	205	13	1	1	5	20	4.83954	0.7621	0.084	3.875	0	0	9.56064	0	0	0	0	0	0	0	0	0	0	0	200	0	0	0	0	0	0	0	0	0	0	0	0	0	0	0	0	0	0	0	0	0
15042	4	2	20.2301	134	13	2	1	5	20	1.387	0.015	0	9.331	0	0	10.733	0	0	0	0	0	0	0	0	0	0	0	250	0	0	0	0	0	0	0	0	0	0	0	0	0	30	0	0	20	0	0	0	0
15044	4	2	20.2712	67	13	3	1	5	20	2.189	0.716	0	9.3342	0.128	0.057	12.4242	0	0	0	0	0	90	0	0	0	200	0	300	0	0	0	0	0	0	0	0	0	0	0	0	0	0	0	0	0	0	0	0	0
15051	4	2	19.3014	67	13	3	1	5	19	1.81212	0.12	0.1232	15.126	0	0	17.1813	0	0	0	0	0	0	0	0	0	275	0	0	0	0	0	0	0	0	0	0	0	0	0	0	10	0	0	0	0	0	0	0	0
16051	4	1	18.7562	53	6	2	1	5	18	5.68856	0.024	0.035	0.08	0	0	5.82756	0	0	0	125	0	0	10	0	0	0	0	180	0	0	0	0	0	0	0	0	0	0	0	0	0	0	0	0	0	0	0	0	0
16072	4	2	18.4548	53	6	2	1	5	18	0.575	0.03	0	1.435	0	0	2.04	0	0	0	0	0	0	0	0	0	0	0	100	0	0	0	0	0	0	0	0	0	0	0	0	0	0	0	0	30	0	0	0	0
16076	4	2	18.0274	53	6	2	1	5	18	1.837	0.015	0	9.331	0	0	11.183	0	0	0	0	0	0	0	0	0	0	0	200	0	0	0	0	0	0	0	0	0	0	0	0	0	0	0	0	0	0	0	0	0
16085	4	1	19.5562	53	6	2	1	5	19	0	0.0225	0	2.4025	0	0	2.425	0	0	0	0	0	0	0	0	0	0	0	0	0	0	0	0	0	0	0	0	0	0	0	0	0	125	0	0	30	0	0	375	0
16086	4	1	18.8356	53	6	2	1	5	18	1.1	0.024	11.3815	0.04	0	0	12.5455	0	0	0	0	0	0	0	0	0	0	0	315	0	0	0	0	0	0	0	0	0	0	0	0	0	40	0	0	0	0	0	0	0
17010	4	1	21.1863	54	13	2	1	5	21	0.886	0.015	0	11.532	0	0	12.433	250	0	0	0	0	0	0	0	0	0	0	100	0	200	0	0	0	0	0	0	0	0	0	0	0	0	0	0	0	0	0	250	0
17059	4	2	22.7288	54	13	2	1	5	22	0.184	0.097	0	0.1124	0.016	0	0.4094	0	0	0	140	0	0	0	0	0	0	0	160	0	0	0	0	0	0	0	0	0	0	0	0	0	0	0	0	0	0	0	0	0
17086	4	2	24.6055	54	13	2	1	5	24	3.1195	0	0.396	10.1485	0	0	13.664	0	0	0	0	0	0	0	0	0	0	0	150	0	0	0	0	0	0	0	0	0	0	0	0	0	0	0	0	18	0	0	0	0
17093	4	2	20.3041	54	13	2	1	5	20	2.1409	0.0225	0.132	8.5357	0	0.0855	10.9166	0	0	0	0	0	0	0	0	0	0	0	350	0	0	0	0	0	0	0	0	0	0	0	0	0	0	0	0	0	0	0	125	0
21003	4	2	22.1781	81	41	4	4	5	22	1.5	0	0	1.4725	0	0	2.9725	0	60	0	0	0	0	0	0	0	0	0	500	0	0	0	0	0	0	0	0	0	0	0	0	0	0	0	0	20	0	0	0	0
21011	4	2	22.5863	81	41	4	4	5	22	5.85538	0.473	0.112	0.04	0	0	6.48038	0	0	0	0	0	0	0	0	0	0	0	200	0	0	0	0	0	0	0	0	0	0	0	0	0	0	0	0	0	0	0	125	0
21013	4	2	23.6685	81	41	4	4	5	23	1.80184	1.176	0.21	0.22025	0.25425	0	3.66235	0	0	0	0	0	130	0	0	0	0	0	450	0	0	0	0	0	0	0	0	0	0	0	0	0	0	0	0	0	0	0	0	0
22002	4	1	18.4274	72	23	3	4	5	18	1.675	0.306	0	0.14	0	0	2.121	0	0	0	0	0	0	0	0	0	0	0	350	0	0	0	0	0	0	0	0	0	0	0	0	0	0	0	0	0	0	0	0	0
22061	4	2	24.9068	72	23	3	4	5	24	6.13896	0.786	0.098	2.736	0	0	9.75896	0	0	0	0	0	0	0	0	0	0	0	500	0	0	0	0	0	0	0	0	0	0	0	0	40	0	0	0	0	0	0	0	0
22079	4	1	19.6986	104	4	1	4	5	19	6.161	0	0.16	12.24	0.372	0	18.933	0	0	0	0	0	0	75	0	0	0	0	0	0	0	0	0	0	0	0	0	0	0	0	0	0	0	0	0	0	0	0	0	0
24058	4	1	23.3836	411	11	3	4	5	23	9.44	0.306	0	0	0	0	9.746	0	0	0	0	0	0	0	0	0	0	0	0	0	0	0	0	0	0	0	0	0	0	0	0	0	0	0	0	0	0	0	0	0
24063	4	2	21.6192	527	11	1	4	5	21	8.73346	0.03	0.36	1.2	0	0	10.3235	0	0	0	125	0	110	0	0	0	0	0	0	0	0	0	0	0	0	0	0	0	0	0	0	0	0	0	0	0	0	0	250	0
24070	4	2	25.6055	528	23	2	4	5	24	1.6445	0.399	0	1.9	0	0	3.9435	0	0	0	0	0	0	0	0	0	0	0	200	0	0	0	0	0	0	0	0	0	0	0	0	0	0	0	0	0	0	0	0	0
25034	4	1	22.063	120	41	2	4	5	22	0.387	0.015	0	11.696	0	0	12.098	0	0	0	0	0	0	0	0	0	0	0	100	0	0	0	0	0	0	0	0	0	0	0	0	0	0	0	0	0	0	0	0	0
25039	4	1	19	120	41	2	4	5	19	2.25	0.5355	0	0	0	0	2.7855	0	0	0	0	0	0	0	0	0	0	0	0	0	0	0	0	0	0	0	0	0	0	0	0	0	0	0	0	0	0	0	0	0
25050	4	2	18.3836	120	41	2	4	5	18	0.8	0.0225	0.12	1.84	0	0.114	2.8965	0	0	0	0	0	0	0	0	0	0	0	150	0	0	0	0	0	0	0	0	0	0	0	0	25	0	0	0	0	0	0	0	0
25063	4	1	24.3151	120	41	2	4	5	24	0.375	0	0.24	3.6	0	0	4.215	0	0	0	0	0	0	0	0	0	0	0	0	0	0	0	0	0	0	0	0	0	0	0	0	0	0	0	0	0	0	0	0	0
26025	4	1	23.537	29	7	1	2	5	23	6.533	0.231	0	9.18	0.279	0	16.223	0	0	0	100	0	0	0	0	0	0	0	200	0	0	0	0	0	0	0	0	0	0	0	0	0	0	0	0	0	0	0	0	0
26027	4	1	21.9178	29	7	1	2	5	21	3.539	0.339	0.08	1.24	0	0	5.198	0	0	0	0	0	0	0	0	0	0	0	40	0	0	0	0	0	0	0	0	0	0	0	0	0	0	0	0	0	0	0	0	0
26034	4	1	19.6712	29	7	1	2	5	19	1.5	0.03	0	1.395	0	0	2.925	0	0	0	90	0	0	0	0	0	0	0	200	0	0	0	0	0	0	0	0	0	0	0	0	0	0	0	0	0	0	0	0	0
26040	4	1	20.8137	29	7	1	2	5	20	1.55	0.045	0	0.04	0	0	1.635	0	0	0	0	0	0	0	0	0	0	0	150	0	0	0	0	0	0	0	0	0	0	0	0	0	0	0	0	0	0	0	0	0
27004	4	2	22.874	56	8	2	2	5	22	3.6842	0.35	0	5.6386	0	0	9.6728	0	0	0	0	110	0	0	0	0	0	0	475	0	0	0	0	0	0	0	0	0	0	0	0	0	10	20	0	0	0	0	0	0
27016	4	1	18.7014	56	8	2	2	5	18	3.85	0.0045	14.8835	0.08	0	0	18.818	0	0	0	0	0	0	0	0	0	0	0	225	0	0	0	0	0	0	0	0	0	0	0	0	0	0	0	0	0	0	0	0	0
27024	4	2	22.7123	56	8	2	2	5	22	0.6472	0	0	2.923	0	0	3.5702	0	0	0	0	0	0	0	0	0	0	0	75	0	0	0	0	0	0	0	0	0	0	0	30	0	75	0	0	0	0	0	0	0
27033	4	2	21.8411	56	8	2	2	5	21	0.786038	0.1683	0.084	4.6655	0	0	5.70384	0	0	0	0	0	0	0	0	0	0	0	175	0	0	0	0	0	0	0	0	0	0	0	0	0	0	0	0	0	0	0	0	0
27035	4	2	21.8658	56	8	2	2	5	21	0	0.0105	12.257	0	0	0	12.2675	0	0	0	0	0	0	0	0	0	0	0	0	0	50	0	0	0	0	0	0	0	0	0	0	0	0	0	0	0	0	0	0	0
27057	4	2	18.126	56	8	2	2	5	18	2.674	0.5331	0	12.214	0	0	15.4211	0	0	0	0	0	0	0	0	0	0	0	600	0	0	0	0	0	0	60	0	0	0	0	0	0	0	0	0	0	0	0	0	0
28036	4	2	21.3616	57	8	2	2	5	21	0.2525	0.2385	0	0.0403	0.012	0	0.5433	0	0	0	110	0	0	0	0	0	40	0	0	0	0	0	0	0	0	0	0	0	0	0	0	0	0	0	0	0	0	0	0	0
28071	4	2	21.0301	71	8	3	2	5	21	6.69	0.045	0	1.936	0	0	8.671	0	0	0	0	0	0	0	0	0	0	0	0	0	0	0	0	0	0	0	0	0	0	0	0	0	0	0	0	0	0	0	0	0
28078	4	1	20.3425	71	8	3	2	5	20	2.253	0.06033	0	0	0	0	2.31333	0	0	0	0	0	0	0	0	0	0	0	0	0	0	0	0	0	0	0	0	0	0	0	0	0	0	0	0	0	0	0	0	0
29039	4	1	20.3178	58	8	2	2	5	20	0.09	0.0075	0	1.467	0	0	1.5645	0	0	0	0	0	0	0	0	0	0	0	0	0	0	0	0	0	0	0	0	0	0	0	0	0	0	0	0	0	0	0	0	0
30028	4	2	22.8247	21	43	1	2	5	22	2.074	0.459	0.15	2.366	0	0	5.049	0	0	0	0	0	0	0	0	0	160	0	0	0	0	0	0	0	0	0	0	0	0	25	0	75	0	0	0	0	0	0	0	0
30062	4	1	21.2493	24	43	1	2	5	21	6.79423	0.553	0.14	0.08	0	0	7.56723	0	0	0	0	0	0	0	0	0	0	0	150	0	0	0	0	0	0	0	0	0	0	0	0	20	0	0	0	0	0	0	0	0
30077	4	2	23.3288	22	43	1	2	5	23	1.849	0.3825	0	0.3605	0.1845	0	2.7765	0	0	0	0	0	0	0	0	0	0	0	280	0	0	0	0	0	0	0	0	0	0	0	0	0	0	0	0	0	0	0	0	0
30084	4	1	25.0438	22	43	1	2	5	24	5.5125	0.98	0	0.12	0	0	6.6125	0	0	0	0	0	0	0	0	0	0	0	100	0	50	0	0	0	0	0	0	0	0	0	0	0	0	0	0	0	0	0	125	0
31009	4	2	24.5178	86	8	2	2	5	24	0.6975	0.04	0	10.1395	0	0	10.877	0	0	0	0	0	0	0	0	0	450	0	50	0	0	0	0	0	0	0	0	0	0	0	0	0	0	0	0	0	0	0	0	0
31025	4	1	22.2822	86	8	2	2	5	22	0.55	0.0075	0.04	0.68	0	0	1.2775	0	0	0	0	0	0	0	0	0	0	0	200	0	0	0	0	0	0	0	0	0	0	0	0	30	0	0	0	0	0	0	0	0
31027	4	1	19.2877	20	8	1	2	5	19	3	0.0225	0	0	0	0	3.0225	0	0	0	0	0	0	0	0	0	0	0	0	0	0	0	0	0	0	0	0	0	0	0	0	0	0	0	0	0	0	0	0	0
31030	4	2	19.7671	86	8	2	2	5	19	0.1685	0.153	0	4.6655	0	0	4.987	0	0	0	0	0	0	0	0	0	0	0	200	0	0	0	0	0	0	0	0	0	0	0	0	0	0	0	0	0	0	0	0	0
31038	4	2	22.9178	86	8	2	2	5	22	3.769	0.335	0	9.331	0	0	13.435	0	0	0	0	0	0	0	0	0	200	0	125	0	0	0	0	0	0	0	0	0	0	40	0	0	0	0	0	0	0	0	0	0
31040	4	2	19.6932	86	8	2	2	5	19	2.2785	0.224	0	0.573	0	0	3.0755	0	0	0	0	0	0	0	0	0	0	200	0	0	0	0	0	0	0	0	0	0	0	0	0	0	0	0	0	0	0	0	0	0
31041	4	2	20.6247	86	8	2	2	5	20	0	0.015	0	4.805	0	0	4.82	0	0	0	0	0	0	0	0	0	0	0	575	0	0	0	0	0	0	0	0	0	0	0	0	30	40	0	0	0	0	0	0	0
33030	4	1	23.8603	79	8	4	2	5	23	2.87846	0.045	0.67	4.49	0.04	0	8.12346	0	0	0	0	0	0	0	0	0	200	0	40	0	0	0	0	0	0	0	0	0	0	0	0	20	0	0	0	0	0	0	0	0
33056	4	2	23.0658	79	8	4	2	5	23	3.945	0.2075	0	0	0	0	4.1525	0	0	0	0	0	0	0	0	0	200	0	0	0	0	0	0	0	0	0	0	0	0	0	0	0	0	0	0	0	0	0	0	0
33060	4	1	18.7397	79	8	4	2	5	18	2.034	0	0	13.866	0	0	15.9	0	0	0	0	0	0	0	0	0	0	0	600	0	0	0	0	0	0	0	0	0	0	0	0	0	70	0	0	0	0	0	0	0
33067	4	2	19.1288	79	8	4	2	5	19	0.61146	0.045	0.33	0.493	0	0	1.47946	200	0	0	0	100	0	0	0	0	0	0	0	0	0	0	0	0	0	0	0	0	0	0	0	0	0	0	0	20	0	0	0	0
33079	4	1	20.9699	79	8	4	2	5	20	6.614	0.369	0	0.08	0	0	7.063	0	0	0	120	0	0	0	0	0	250	0	100	0	0	0	0	0	0	0	0	0	0	0	0	20	40	0	0	0	0	0	125	0
33089	4	2	20.3397	79	8	4	2	5	20	7.15703	0.3375	0.1852	0.852	0.96	0	9.49173	0	0	0	100	0	0	0	0	0	0	0	450	0	0	0	0	0	0	0	0	0	0	0	0	0	0	0	0	60	0	0	0	0
33105	4	1	20.4603	79	8	4	2	5	20	17.8771	0.045	0.07	0.04	0	0	18.0321	0	0	0	140	0	0	0	0	0	0	0	440	0	0	0	0	0	0	0	0	0	0	0	0	40	0	0	0	0	0	0	0	0
33106	4	2	20.3562	79	8	4	2	5	20	10.8521	0.03	0.07	7.3185	0	0	18.2706	0	0	0	0	0	0	0	0	0	0	0	140	0	0	0	0	0	0	0	0	0	0	0	0	0	0	0	0	0	0	0	0	0
33133	4	1	21.1836	79	8	4	2	5	21	2.5765	0.092	0	4.6655	0	0	7.334	0	0	0	0	0	0	0	0	0	0	0	250	0	0	0	0	0	0	0	0	0	0	0	0	0	0	0	0	0	0	0	0	0
33135	4	1	23.211	79	8	4	2	5	23	0	0.015	0	0	0	0	0.015	0	0	0	0	0	0	0	0	0	0	0	0	0	0	0	0	0	0	0	0	0	0	0	0	0	0	0	0	0	0	0	0	0
33155	4	2	19.1534	79	8	4	2	5	19	5.99046	0.893	0.28	0	0	0	7.16346	0	0	0	140	0	0	0	0	0	0	0	0	0	0	0	0	0	0	0	0	0	0	0	0	0	0	0	0	0	0	0	0	0
33159	4	1	20.4849	79	8	4	2	5	20	0.337	0	0.12	11.131	0	0	11.588	0	0	0	0	0	0	0	0	0	0	0	300	0	0	0	0	0	0	0	0	0	0	0	0	0	0	0	0	0	0	0	125	0
34015	4	1	22.4164	80	50	4	2	5	22	9.6372	0.6225	0	6.9936	0	0	17.2533	0	0	0	0	0	0	0	0	0	0	0	200	0	0	0	0	0	0	0	0	0	0	0	0	0	0	0	0	0	0	0	0	0
35007	4	1	22.8438	70	8	3	2	5	22	0.19	0.2295	0	0.12	0	0	0.5395	0	0	0	0	0	0	0	0	0	0	0	120	0	0	0	0	0	0	0	0	0	0	0	0	0	0	0	0	0	0	0	0	0
35022	4	1	24.2411	70	8	3	2	5	24	7.192	0.847	0.4032	6.208	0	0	14.6502	0	0	0	0	0	0	0	0	0	0	0	0	0	0	0	0	0	0	0	0	0	0	0	0	0	0	0	0	40	0	0	0	0
35041	4	2	21.1863	79	8	4	2	5	21	2.58745	0.366	0.028	16.0743	0	0	19.0557	50	0	0	0	0	0	0	0	0	0	0	365	0	0	0	0	0	0	0	0	0	0	0	0	20	0	0	0	0	0	0	0	0
35043	4	2	23.8384	79	8	4	2	5	23	0.8252	0.216	3.68	0.3044	0.1476	0	5.1732	0	20	0	0	0	0	0	0	0	0	90	0	0	0	0	0	0	0	0	0	0	0	0	25	0	0	0	0	0	0	0	0	0
35066	4	1	23.6986	79	8	4	2	5	23	4.575	0.765	0	0.06	0	0	5.4	0	0	0	0	0	0	0	0	0	0	125	0	0	0	0	0	0	0	0	0	0	0	0	0	0	0	0	0	0	0	0	0	0
37005	4	2	20.8986	124	3	2	5	5	20	2.80148	0.509	0.231	1.611	0	0	5.15248	0	0	0	0	0	0	0	0	0	200	0	25	0	0	0	0	0	0	0	0	0	0	0	0	0	0	0	0	0	0	0	0	125
37008	4	2	21.263	122	3	3	5	5	21	1.75796	0.0225	0.098	0	0	0	1.87846	0	0	0	0	0	0	0	0	0	200	0	150	0	0	0	0	0	0	0	0	0	0	0	0	0	0	0	0	0	0	0	125	0
37012	4	2	24.4	231	3	2	5	5	24	5.07363	0.015	0.203	2.3464	0	0.342	7.98003	0	0	0	0	0	0	0	0	0	0	0	200	0	0	0	0	0	0	0	0	0	0	0	0	0	15	0	0	0	0	0	0	0
37051	4	2	18.063	413	3	1	5	5	18	6.144	0.04	0	0	0.27	0	6.454	0	0	0	0	0	0	0	0	0	0	0	0	0	0	0	0	0	0	0	0	0	0	0	0	0	0	0	0	20	0	0	0	0
38067	4	2	21.874	109	12	2	5	5	21	0.519404	0.0765	0.063	0	0	0	0.658903	0	0	0	0	0	0	0	0	0	0	0	0	0	0	0	0	0	0	0	0	0	0	0	0	60	0	0	0	0	0	0	0	0
38072	4	2	19.3534	108	12	1	5	5	19	2.18977	0.075	0.042	1.55	0	0	3.85677	0	0	0	0	0	0	0	0	0	0	0	80	0	0	0	0	0	0	0	0	0	0	0	0	0	0	0	0	0	0	0	0	0
38100	4	2	23.263	45	12	1	5	5	23	0.1685	0	0	6.2155	0	0	6.384	0	0	0	0	0	0	0	0	0	0	250	0	0	0	0	0	80	0	0	0	0	0	0	0	0	0	0	0	50	0	0	0	0
38108	4	2	18.0932	45	12	1	5	5	18	1.175	0	0	4.845	0	0	6.02	0	0	0	0	0	0	0	0	0	0	0	250	0	0	0	0	0	0	0	0	0	0	0	0	0	0	0	0	0	0	0	0	0
38111	4	2	21.9178	112	12	3	5	5	21	10.0183	0.236228	0.021	0	0.45	0	10.7256	200	0	0	0	0	0	0	0	0	0	0	0	0	0	0	0	0	0	0	0	0	0	0	0	30	0	0	0	0	0	0	0	0
38116	4	2	18.726	112	12	3	5	5	18	1.15733	0.115	0.077	1.55	0	0	2.89933	0	0	0	0	0	0	0	0	0	0	200	0	0	0	0	0	0	0	0	0	0	0	0	0	0	0	0	0	0	0	0	125	0
38131	4	1	18.1178	108	12	1	5	5	18	0.211915	0.015	0.07	5.2824	0	0	5.57932	0	0	0	0	0	200	0	0	0	0	0	200	0	0	0	0	0	0	0	0	0	0	0	0	25	0	0	0	0	0	0	0	0
38133	4	1	24.7589	112	12	3	5	5	24	0	0	0	0	0	0	0	500	0	0	140	0	0	0	0	0	0	0	0	0	0	0	0	0	0	0	0	0	0	0	0	0	0	0	0	0	0	0	0	0
38142	4	1	21.526	114	17	3	2	5	21	0.45	0	0.132	1.98	0	0	2.562	0	0	0	0	0	0	0	0	0	0	0	0	0	0	0	0	0	0	0	0	0	0	0	0	0	0	0	0	0	0	0	0	0
38143	4	2	20.0192	114	17	3	2	5	20	0.765423	0.0075	0.014	1.922	0	0	2.70892	0	0	0	0	0	0	0	0	0	0	0	0	0	0	0	0	0	0	0	0	0	0	0	0	0	0	0	0	0	0	0	0	0
38146	4	2	20.5507	114	17	3	2	5	20	2.665	0	0	14.632	0	0	17.297	0	0	0	0	0	0	0	0	0	0	0	400	0	0	0	0	0	0	0	0	0	0	0	0	0	0	40	0	0	0	0	0	0
38148	4	2	24.0767	114	17	3	2	5	24	15.6976	0.1622	0.07	0.08	0.675	0	16.6848	0	0	0	0	0	0	0	0	0	0	0	350	0	0	0	0	0	0	0	0	0	0	0	0	0	0	0	0	0	0	0	0	0
39008	4	2	18.9288	85	35	4	6	5	18	17.5515	0.648	0.098	0.2375	0.8025	0	19.3375	0	0	0	0	0	0	0	0	0	0	150	0	0	0	0	0	0	0	0	0	0	0	0	0	0	0	0	0	0	0	0	0	0
39021	4	1	18.3178	51	35	1	6	5	18	6.8022	0	0	0.02	0	0	6.8222	0	0	0	0	0	0	0	0	0	0	0	125	0	0	0	0	0	0	0	0	0	0	0	0	0	0	0	0	0	0	0	0	0
39061	4	2	23.4795	85	35	4	6	5	23	8.303	1.369	0	5.699	0	0	15.371	0	0	0	0	0	120	0	0	0	0	0	0	0	200	0	0	0	0	0	0	0	0	0	50	0	150	0	0	0	0	0	0	0
39076	4	1	23.189	52	35	1	6	5	23	2.61	0.81	0	0	0	0	3.42	0	0	0	0	0	0	0	0	0	0	0	0	0	0	0	0	0	0	0	0	0	0	0	0	0	320	0	0	0	0	0	0	0
40001	4	2	22.0521	77	38	3	6	5	22	4.64382	0.723	0.014	14.3392	0	0	19.72	0	0	0	0	0	0	0	0	0	0	0	400	0	0	0	0	0	0	0	0	0	0	0	0	0	0	0	0	0	0	0	0	0
40010	4	2	21.2356	77	38	3	6	5	21	0.4044	0	0	11.1972	0	0	11.6016	0	0	0	0	0	0	0	0	0	0	0	200	0	0	0	0	0	0	0	0	0	0	0	0	0	0	0	0	0	0	0	0	0
40011	4	2	23.9808	77	38	3	6	5	23	11.2931	0	0.021	0.12	0	0	11.4341	0	0	0	0	0	0	0	0	0	0	0	0	0	0	0	0	0	0	0	0	0	0	0	0	0	0	0	0	0	0	0	0	0
41005	4	2	20.4822	81	41	4	4	5	20	3.8	0	0	0.04	0	0	3.84	0	0	0	0	0	0	0	0	0	0	0	300	0	0	0	0	0	0	0	0	0	0	0	0	0	0	0	0	0	0	0	0	0
41014	4	2	24.337	81	41	4	4	5	24	1.01438	1.368	0.112	0.605	0	0	3.09938	0	0	0	0	0	0	0	0	0	0	100	100	0	0	0	0	0	0	0	0	0	0	0	0	0	0	0	0	0	0	0	0	0
81109	4	2	21.1507	78	28	4	1	5	21	1.5	0.612	0	0	0	0	2.112	0	0	0	0	0	0	0	0	0	0	0	200	0	0	0	0	0	0	0	0	0	0	0	0	0	0	0	0	0	0	30	0	0
81204	4	2	24.3068	78	28	4	1	5	24	6.71921	0.0625	0.007	0.016	0.225	0	7.02971	0	0	0	0	0	0	0	0	0	150	0	0	0	0	0	0	0	0	0	0	0	0	0	0	0	0	0	0	0	0	0	0	0
81209	4	1	20.3836	78	28	4	1	5	20	0.496315	0.3263	0.07	0	0	0	0.892615	0	0	0	0	0	0	0	0	0	0	0	0	0	0	0	0	0	0	0	0	0	0	0	0	0	0	0	0	0	0	0	0	0
81211	4	1	23.8548	535	40	3	1	5	23	0	0.0075	0	0	0	0	0.0075	0	0	0	0	0	0	0	0	0	0	0	0	0	0	0	0	0	0	0	0	0	0	0	0	0	0	0	0	60	0	0	0	0
81214	4	2	21.5041	78	28	4	1	5	21	3.8907	0.1175	0	0.0402	0.008	0	4.0564	0	0	0	0	0	0	0	0	0	0	0	150	0	0	0	0	0	0	0	0	0	0	0	0	0	0	0	0	0	0	0	0	0
81220	4	1	22.6301	78	28	4	1	5	22	2.82	0.4275	0	0	0.09	0	3.3375	0	0	0	0	0	0	0	0	0	0	0	500	0	0	0	0	0	0	0	0	0	0	0	0	0	0	0	0	0	0	0	0	0
81231	4	2	20.4411	78	28	4	1	5	20	0.323038	0.655	0.084	0.04	0	0	1.10204	0	0	0	0	0	0	0	0	0	0	0	250	0	0	0	0	0	0	0	0	0	0	0	0	50	0	0	0	0	0	0	0	0
81302	4	2	23.0274	418	28	2	1	5	23	1.66696	0.78	0.28	3.4005	0	0	6.12746	0	0	0	0	0	0	0	0	0	0	0	200	0	0	0	0	0	0	0	0	0	0	0	0	0	0	0	0	0	0	0	0	0
81405	4	2	22.0849	78	28	4	1	5	22	0	0	0	0	0	0	0	0	0	0	0	0	0	0	0	0	0	0	0	0	0	0	0	0	0	0	0	0	0	0	0	30	0	0	0	0	0	0	0	0
81414	4	2	19.4822	78	28	4	1	5	19	1.11106	0.1	0.035	0	0	0	1.24606	0	0	0	0	0	0	0	0	0	0	0	500	0	0	0	0	0	0	0	0	0	0	0	0	40	0	0	0	0	0	0	0	0
81415	4	2	22.2438	78	28	4	1	5	22	0	0	0	0	0	0	0	0	0	0	0	0	0	0	0	0	0	0	500	0	0	0	0	0	0	0	0	0	0	0	0	0	0	0	0	0	0	0	0	0
81420	4	1	23.8493	78	28	4	1	5	23	0	0	0	0	0	0	0	0	0	0	0	0	0	0	0	0	0	0	250	0	0	0	0	0	0	0	0	0	0	0	0	0	0	0	0	0	0	0	250	0
81425	4	2	21.3014	78	28	4	1	5	21	0.077115	0	0.07	0	0	0	0.147115	0	0	0	0	0	0	0	0	0	0	0	0	0	0	0	0	0	0	0	0	0	0	0	0	0	0	0	0	0	0	0	0	0
81427	4	2	24.0466	78	28	4	1	5	24	2.39796	0.03	0.098	0.132	0	0	2.65796	0	0	0	0	0	0	0	0	0	0	0	400	0	0	0	0	0	0	0	0	0	0	0	0	0	60	0	0	0	0	0	0	0
81515	4	2	20.2164	78	28	4	1	5	20	0.077115	0	0.07	0	0	0	0.147115	0	0	0	0	0	0	0	0	0	0	0	0	0	0	0	0	0	0	0	0	0	0	0	0	0	0	0	0	0	0	0	0	0
81517	4	2	19.9753	78	28	4	1	5	19	2.39796	0.03	0.098	0.132	0	0	2.65796	0	0	0	0	0	0	0	0	0	0	0	400	0	0	0	0	0	0	0	0	0	0	0	0	0	60	0	0	0	0	0	0	0
87034	4	1	18.326	217	30	1	5	5	18	0	0.03	0	9.61	0	0	9.64	0	0	0	0	0	0	0	0	0	0	0	0	0	0	0	0	0	0	0	0	0	0	0	0	0	0	0	0	0	0	0	125	0
88006	4	1	19.8795	84	46	4	5	5	19	1.05	0	0	0	0	0	1.05	0	0	0	0	0	0	0	0	0	0	0	0	0	0	0	0	0	0	0	0	0	0	0	0	0	0	0	0	0	0	0	0	0
88012	4	2	21.4658	84	46	4	5	5	21	14.014	0.2295	0	0.08	0	0	14.3235	0	60	0	0	0	0	0	0	0	400	0	0	0	0	0	0	0	0	0	0	0	0	0	0	85	0	20	0	0	0	0	0	0
88019	4	2	25.4877	84	46	4	5	5	24	3.04688	0.175	10.743	1.2325	0	0	15.1974	0	60	0	0	0	0	0	0	0	350	0	0	0	0	0	0	0	0	0	0	0	0	0	0	0	0	0	0	0	0	0	0	0
88024	4	1	23.9205	84	46	4	5	5	23	0.1	0	0	0.08	0	0	0.18	0	0	0	0	0	0	0	0	0	400	0	0	0	0	0	0	0	0	0	0	0	0	0	0	40	20	0	0	0	0	0	125	0
88027	4	1	22.0849	84	46	4	5	5	22	7.66438	0.175	0.112	3.73	0	0	11.6814	0	0	0	0	0	0	0	0	0	200	0	50	0	0	0	0	0	0	0	0	0	0	0	0	0	0	0	0	0	0	0	0	0
88031	4	1	22.7068	84	46	4	5	5	22	0.4544	0	0	11.2372	0	0	11.6916	0	0	0	0	0	0	0	0	0	200	0	100	0	0	0	0	0	0	0	0	0	0	0	0	0	0	0	0	40	0	0	0	0
88033	4	1	23.2685	84	46	4	5	5	23	8.26838	0.191	0.112	0.04	0	0	8.61138	0	0	0	0	0	0	0	0	0	200	0	0	0	0	0	0	0	0	0	0	0	0	0	0	0	0	0	0	0	0	0	125	0
88035	4	2	20.8137	129	46	1	5	5	20	1.6	0	0.16	2.48	0	0.1425	4.3825	0	0	0	0	0	0	0	0	0	0	0	250	0	0	0	0	0	0	0	0	0	0	0	0	0	0	0	0	0	0	0	0	0
88038	4	2	19.2849	84	46	4	5	5	19	0.65423	0.657	0.14	0.04	0	0.171	1.66223	0	0	0	0	0	100	0	0	0	0	200	0	0	0	0	0	0	0	0	0	0	0	0	0	0	0	0	0	0	0	0	0	0
88070	4	1	19.9945	129	46	1	5	5	20	0	0.153	8.755	2.635	0	0	11.543	0	0	0	0	0	0	0	0	0	0	0	0	0	0	0	0	0	0	0	0	0	0	0	0	40	0	0	0	0	0	0	0	0
88093	4	2	20.789	129	46	1	5	5	20	0.05	0	0	1.962	0	0	2.012	0	0	0	0	0	0	0	0	0	0	200	0	0	0	0	0	0	0	0	0	0	0	0	0	0	0	0	0	0	0	0	0	0
88103	4	2	25.0932	129	46	1	5	5	24	1.55	0	0	1.44	0	0	2.99	0	0	0	0	0	0	0	0	0	200	0	0	0	0	0	0	0	0	0	0	0	0	0	0	40	0	0	0	0	0	0	0	0
2081	4	1	22.8877	62	33	2	3	5	22	1.5	0.0075	0	7.316	0	0	8.8235	0	0	0	0	0	0	0	0	0	0	0	0	0	0	0	0	0	0	0	0	0	0	0	0	0	20	0	0	0	0	0	0	0
2085	4	1	18.3205	62	33	2	3	5	18	4.84	0.95	0	8.27	0	0	14.06	0	0	0	0	0	0	0	0	0	0	0	250	0	0	0	0	0	0	0	0	0	0	0	0	200	0	0	0	0	0	0	325	0
2087	4	1	20.9068	62	33	2	3	5	20	7.165	0	0	0.4675	0.3075	0	7.94	0	0	0	0	0	0	0	0	0	0	0	450	0	0	0	0	0	0	0	0	0	0	0	0	0	0	0	0	0	0	0	0	0
3010	4	2	22.0603	44	39	1	3	5	22	3.05	0.03	0	0.04	0	0	3.12	0	0	0	0	0	0	0	0	0	0	500	0	0	0	0	0	0	0	0	0	0	0	0	0	0	0	0	0	0	0	0	0	0
3024	4	1	19.9562	44	39	1	3	5	19	2.4185	0.0675	0	4.6655	0	0	7.1515	0	0	0	0	0	0	0	0	0	0	0	300	0	0	0	0	0	0	0	0	0	0	0	0	30	0	0	0	0	0	0	250	0
3098	4	2	20.8712	118	39	1	3	5	20	3.29	0.5425	0	6.715	0	0	10.5475	0	0	0	0	0	0	0	0	0	0	0	400	0	0	0	0	0	0	0	0	0	0	0	0	0	0	0	0	0	0	0	125	0
3119	4	1	22.7589	73	39	3	3	5	22	5.4315	0.7925	0	8.2845	0	0	14.5085	0	0	0	0	0	0	0	0	0	0	0	300	0	0	0	0	0	0	0	0	0	0	0	0	0	120	0	0	0	0	0	0	0
3139	4	1	22.5863	118	39	1	3	5	22	0.1685	0	0	4.6655	0	0	4.834	0	0	0	0	0	0	0	0	0	0	0	300	0	0	0	0	0	0	0	0	0	0	0	0	0	0	0	0	0	0	0	0	0
3167	4	2	23.463	73	39	3	3	5	23	7.9035	0.5275	0	7.2505	0	0	15.6815	250	0	0	0	0	0	0	0	0	0	0	250	0	0	0	0	0	0	0	0	0	0	0	0	0	0	0	0	0	0	0	0	0
4004	4	2	18.0575	420	39	3	3	5	18	0.1	0.015	0	0.08	0	0	0.195	0	0	0	0	0	0	0	0	0	100	0	0	0	0	0	0	0	0	0	0	0	0	0	0	0	0	0	0	0	0	0	125	0
5240	4	2	18.4	510	20	3	3	5	18	2.435	1.515	0	1.032	0	0	4.982	0	0	0	0	0	0	0	0	0	150	0	0	0	0	0	0	0	0	0	0	0	0	0	0	0	0	0	0	0	0	0	0	125
5248	4	2	22.6712	514	20	3	3	5	22	7.48512	1.024	0.15	1.32	0	0	9.97912	0	0	0	0	0	90	0	0	0	250	0	450	0	0	0	0	0	0	0	0	0	0	0	0	0	0	0	0	0	0	0	0	0
5275	4	2	24.0712	514	20	3	3	5	24	0.48673	0.285	0.14	0.04	0	0	0.95173	0	0	0	0	0	0	50	0	0	0	100	30	0	0	0	0	0	0	0	0	0	0	0	0	0	0	0	0	0	0	0	0	125
5324	4	2	23.3178	510	20	3	3	5	23	1.48665	0.135	0.154	0.024	0	0	1.79965	0	0	0	0	0	0	0	0	0	0	200	0	0	0	0	0	0	0	0	0	0	0	0	0	0	0	0	0	0	0	0	250	0
5365	4	1	20.1315	510	20	3	3	5	20	0.683345	0.447	0.37	2.4	0	0	3.90035	0	0	0	0	0	0	0	0	0	0	0	250	0	0	0	0	0	0	0	0	0	0	0	0	0	0	0	0	30	0	0	0	0
8003	4	2	23.7863	415	28	3	1	5	23	3.06	0.4341	0	0.04	0	0	3.5341	0	0	0	0	0	0	0	0	0	0	0	325	0	0	0	0	0	0	0	0	0	0	0	0	40	0	0	0	0	0	0	0	0
8017	4	2	19.5452	403	28	3	1	5	19	12.1932	0.477	0.14	1.415	0	0	14.2252	0	0	0	0	0	0	0	0	0	0	0	150	0	0	0	0	0	0	0	0	0	0	0	50	0	0	0	0	0	0	0	0	0
8018	4	2	19.8411	403	28	3	1	5	19	0.337	0.0225	0	11.641	0	0	12.0005	0	0	0	0	0	0	0	0	0	0	0	200	0	0	0	0	0	0	0	0	0	0	0	0	0	0	0	0	0	0	0	125	0
8048	4	2	21.7918	403	28	3	1	5	21	1.81423	0.46	14.148	0.04	0	0	16.4622	0	0	0	0	0	0	0	0	0	0	0	50	0	0	0	0	0	0	0	0	0	0	0	0	0	0	0	0	0	0	0	0	0
10004	4	1	21.4384	78	28	4	1	5	21	2.48138	0.08	0.112	0	0	0	2.67338	0	0	0	0	0	0	0	0	0	0	0	250	0	0	0	0	0	0	0	0	0	0	0	0	0	0	0	0	0	0	0	0	0
11018	4	1	21.0712	69	47	3	1	5	21	2.48569	0.8455	0.056	0.204	0	0	3.59119	0	0	0	0	0	200	0	0	0	0	0	240	0	0	0	0	0	0	0	0	0	0	0	0	0	0	0	0	0	0	0	0	0
11036	4	1	25.3644	69	47	3	1	5	24	15.544	0.285	0.132	3.88	0	0	19.841	0	0	0	0	0	0	0	0	0	0	0	225	0	0	0	0	0	0	0	0	0	0	0	0	0	0	0	0	20	0	0	0	0
11043	4	2	22.1068	69	47	3	1	5	22	15.058	0.0225	0	0.092	0	0.15	15.3225	0	0	0	0	0	0	0	0	0	200	0	0	0	0	0	0	0	0	0	0	0	0	0	0	30	0	0	0	0	0	0	125	0
11076	4	1	23.8329	69	47	3	1	5	23	0.1	0.0225	0.8	13.5525	0	0	14.475	0	0	0	0	0	0	0	0	0	0	0	0	0	0	0	0	0	0	0	0	0	0	0	0	0	0	0	0	0	0	0	0	0
11079	4	2	20.5589	69	47	3	1	5	20	0.589	0.055	0	0.128	0	0	0.772	0	0	0	0	0	0	0	0	0	0	350	0	0	0	0	0	0	0	0	0	0	0	0	0	0	0	0	0	0	0	0	0	0
11099	4	2	19.0055	69	47	3	1	5	19	0.347133	0.054	0.203	1.5125	0	0	2.11663	0	0	0	0	0	0	0	0	0	225	0	0	0	0	0	0	0	0	0	0	0	0	0	0	0	0	0	0	0	0	0	0	125
13037	4	1	21.537	101	2	1	1	5	21	9.18712	0.2295	0.07	8.228	0	0	17.7146	0	0	0	0	0	0	20	0	0	0	0	100	0	0	0	0	0	0	0	0	0	0	0	0	0	0	0	0	0	0	0	0	0
13203	4	2	22.4986	66	2	3	1	5	22	0.18	0	0.132	2.124	0	0	2.436	0	0	0	0	0	0	0	0	0	0	0	0	0	0	0	0	0	0	0	0	0	0	0	0	0	0	0	0	20	0	0	0	0
14038	4	2	24.2438	67	13	3	1	5	24	3	0	0	0	0	0	3	0	0	0	0	0	450	0	0	0	0	0	0	0	0	0	0	0	0	0	0	0	0	0	0	0	0	0	0	0	0	0	0	0
14040	4	2	22.3205	67	13	3	1	5	22	0.595	0.03	0	1.7286	0	0	2.3536	0	0	0	0	0	0	0	0	0	0	125	30	0	0	0	0	0	0	0	0	0	0	0	0	0	0	0	0	0	0	0	0	0
14098	4	1	24.2301	201	13	1	1	5	24	0.202115	0.0225	0.07	0.3	0	0	0.594615	0	0	0	0	0	0	0	0	0	0	0	125	0	0	0	0	0	0	0	0	0	0	0	0	0	0	0	0	0	0	0	0	0
14104	4	1	24.7644	133	13	2	1	5	24	0.25	0	0	0.2	0	0	0.45	0	0	0	0	0	0	0	0	0	0	0	250	0	0	0	0	0	0	0	0	0	0	0	0	0	0	0	0	0	0	0	0	0
14106	4	1	24.5233	208	13	2	1	5	24	17.5968	0.478	0.042	0.2	0.675	0	18.9918	0	0	0	0	0	0	0	0	0	0	0	250	0	0	0	0	0	0	0	0	0	0	0	0	0	0	0	0	0	0	0	0	0
14114	4	1	18.937	67	13	3	1	5	18	1.837	0	0	9.331	0	0	11.168	0	0	0	0	0	0	0	0	0	0	0	200	0	0	0	0	0	0	0	0	0	0	0	0	50	0	0	0	0	0	0	0	0
15036	4	2	21.8137	133	13	2	1	5	21	0	0	0	0	0	0	0	0	0	0	0	0	0	0	0	0	250	0	0	0	0	0	0	0	0	0	0	0	0	0	0	0	0	0	0	0	0	0	0	0
15047	4	2	24.1507	134	13	2	1	5	24	1.262	0.153	0.52	6.812	0	0	8.747	0	0	0	0	0	0	0	0	0	0	0	250	0	0	0	0	0	0	0	0	0	0	0	0	0	0	0	0	0	0	0	0	0
15057	4	2	19.5753	213	45	2	1	5	19	0.125	0	0	0.116	0	0	0.241	0	0	0	0	0	0	0	0	0	0	0	125	0	0	0	0	0	0	0	0	0	0	0	0	0	0	0	0	0	0	0	0	0
16003	4	2	24.8384	53	6	2	1	5	24	0.190115	0.138	0.07	0	0	0	0.398115	0	0	0	0	0	0	0	0	0	200	0	0	0	0	0	0	0	0	0	0	0	0	0	0	0	0	0	0	45	0	0	0	0
16004	4	2	24.7589	53	6	2	1	5	24	1.05	0.306	0	3.844	0	0	5.2	0	0	0	0	0	0	0	0	0	250	0	0	0	0	0	0	0	0	0	0	0	0	0	0	0	0	0	0	30	0	0	0	0
16067	4	2	18.9041	53	6	2	1	5	18	0.55	0.012	0	11.612	0	0	12.174	0	0	0	0	0	0	0	0	0	0	330	0	0	0	0	0	125	0	0	0	0	0	0	0	105	0	0	0	0	0	0	0	0
16081	4	1	18.7178	53	6	2	1	5	18	0.387	0.021	0	9.371	0	0	9.779	0	0	0	130	0	0	0	0	0	0	0	315	0	0	0	0	0	0	0	0	0	0	0	0	0	0	0	0	30	0	58	0	0
17018	4	2	18.7233	54	13	2	1	5	18	0.381469	0	0.306	9.6921	0.0615	0	10.4411	0	0	0	0	0	0	0	0	0	420	0	0	0	0	0	0	0	0	0	0	0	0	0	0	0	0	0	0	0	0	0	0	0
17053	4	2	21.9014	54	13	2	1	5	21	0.315869	0.015	0.442	13.4648	0	0	14.2377	0	0	0	0	0	0	0	0	0	0	400	0	0	0	0	0	0	0	0	0	0	0	0	0	0	0	0	0	0	0	0	125	0
17084	4	2	19.5288	54	13	2	1	5	19	4.26085	2.32	0.028	12.456	0	0	19.0648	0	0	0	0	0	0	0	0	0	0	0	0	0	50	0	0	0	0	0	0	0	0	0	0	0	0	0	0	0	0	0	0	0
17085	4	2	20.274	54	13	2	1	5	20	0.552134	0.04	0.021	0.08	0	0	0.693134	0	0	0	0	0	0	0	0	0	0	0	400	0	50	0	0	0	0	0	0	0	0	0	0	0	0	0	0	0	0	0	0	0
17095	4	1	18.211	54	13	2	1	5	18	1.82354	0.015	0.85	16.2156	0	0	18.9041	0	0	0	0	0	0	0	0	0	0	0	200	0	0	0	0	0	0	0	0	0	0	0	0	0	0	0	0	0	0	0	0	0
17096	4	1	23.3726	54	13	2	1	5	23	0.96813	0.081	9.7705	6.6117	0	0	17.4313	0	0	0	0	0	0	0	0	0	0	0	300	0	100	0	0	0	0	0	0	0	0	0	0	0	0	0	0	0	0	0	0	0
20050	4	1	23.0795	82	29	4	4	5	23	7.48192	0.8484	0.196	5.892	0	0	14.4183	0	0	0	0	0	0	0	0	0	0	0	0	0	0	0	0	0	0	0	0	0	0	100	0	0	0	0	0	0	0	0	125	0
21021	4	2	21.6904	81	41	4	4	5	21	9.00254	0.706	0.084	0	0	0	9.79254	0	0	0	0	0	0	0	0	0	0	0	0	0	0	0	0	0	0	0	0	0	0	0	0	0	0	0	0	0	0	0	0	0
21026	4	1	22.1123	228	41	2	4	5	22	1.925	0.015	0	3.76	0	0	5.7	0	0	0	0	0	0	0	0	0	0	0	100	0	0	0	0	0	0	0	0	0	0	90	0	0	0	0	0	0	0	0	0	0
21066	4	2	19.0767	409	41	3	4	5	19	3.74154	0.5465	15.0935	0.0408	0.032	0	19.4543	0	0	0	0	0	0	0	0	0	0	0	50	0	0	0	0	0	0	0	0	0	0	0	0	0	0	0	0	60	0	0	125	0
21069	4	2	20.7863	81	41	4	4	5	20	1.594	0.082	0	0.0404	0.016	0	1.7324	0	30	0	125	0	0	0	0	0	0	200	30	0	0	0	0	0	0	0	0	0	0	0	0	0	0	0	0	15	0	0	0	0
22018	4	1	18.5616	72	23	3	4	5	18	0.07	0	0	0.056	0	0	0.126	0	0	0	0	0	0	0	0	0	250	0	0	0	0	0	0	0	0	0	0	0	0	0	0	0	0	0	0	0	0	0	0	0
22037	4	1	18.6219	72	23	3	4	5	18	1.74169	0.408	0.056	2.43	0	0	4.63569	250	0	0	0	0	0	0	0	0	0	0	250	0	0	0	0	0	0	0	0	0	0	0	0	0	0	0	0	20	0	0	0	0
22060	4	1	22.9836	72	23	3	4	5	22	7.275	0	0.132	4.4	0	0	11.807	0	0	0	0	0	0	0	0	0	0	0	500	0	0	0	0	0	0	0	0	0	0	50	0	0	0	0	0	0	0	0	0	0
22064	4	2	22.7699	72	23	3	4	5	22	0.743403	0.03	0.063	18.662	0	0	19.4984	0	0	0	0	0	0	0	0	0	250	0	0	0	0	0	0	0	0	0	0	0	0	0	0	0	40	0	0	0	0	0	0	0
24074	4	2	21.8438	72	23	3	4	5	21	0.7435	0.06	0	0.08	0	0	0.8835	0	0	0	0	0	0	0	0	0	0	0	350	0	0	0	0	0	0	0	0	0	0	0	0	0	0	0	0	15	0	0	0	0
26009	4	1	20.1699	28	7	1	2	5	20	18.9912	0.246	0.14	0.08	0	0	19.4572	0	0	0	0	0	0	0	0	0	150	0	0	0	0	0	0	0	0	0	0	0	0	0	0	0	60	0	0	0	0	0	125	0
27029	4	2	19.2849	56	8	2	2	5	19	1.556	0.1437	0	8.1	0.012	0	9.8117	0	0	0	0	0	0	0	0	0	0	0	0	0	0	0	0	0	0	0	0	0	0	0	0	0	0	0	0	0	0	0	0	0
27030	4	2	19.9671	56	8	2	2	5	19	0.033	0.0615	0	4.8053	0.012	0	4.9118	0	0	0	0	0	0	0	0	0	0	0	0	0	0	0	0	0	0	0	0	0	0	0	0	0	20	0	0	0	0	0	0	0
28004	4	2	23.7397	57	8	2	2	5	23	0.17	0.0525	14.078	0.08	0	0	14.3805	0	0	0	0	0	0	0	0	0	40	0	0	0	0	0	0	0	0	0	0	0	0	0	0	0	0	0	0	0	0	0	0	0
29034	4	1	25.8274	58	8	2	2	5	24	2.441	1.7725	0	13.624	0	0	17.8375	0	0	0	0	0	0	0	0	0	0	0	190	0	0	0	0	0	0	0	0	0	0	0	0	40	0	0	0	0	0	0	0	0
30001	4	1	20.3726	25	43	1	2	5	20	4.0825	2.1675	0	11.6725	0.06	0	17.9825	0	0	0	0	0	0	0	0	0	0	0	200	0	0	0	0	0	0	0	0	0	0	0	0	0	0	0	0	0	0	0	0	0
30005	4	1	20.4219	25	43	1	2	5	20	0.670192	0.184	0.056	4.6655	0	0	5.57569	0	0	0	0	0	0	0	0	0	0	0	200	0	0	0	0	0	0	0	0	0	0	0	0	0	0	0	0	0	0	0	0	0
30027	4	1	24.3479	21	43	1	2	5	24	1.55	0.153	0	0.04	0	0	1.743	0	0	0	0	0	0	0	0	0	0	0	200	0	0	0	0	0	0	0	0	0	0	0	0	0	0	0	0	0	0	0	0	0
30029	4	2	20.8877	21	43	1	2	5	20	2.084	0.306	0.15	3.229	0	0	5.769	0	0	0	0	0	0	0	0	0	160	0	0	0	0	0	0	0	0	0	0	0	0	0	0	25	0	0	0	0	0	0	0	0
30056	4	1	21.2795	23	43	1	2	5	21	1.55	0.015	0.4	6.04	0	0	8.005	0	0	0	0	0	0	0	0	0	0	0	0	0	0	0	0	0	0	0	0	0	0	0	0	0	0	0	0	0	0	0	125	0
30069	4	2	19.7041	24	43	1	2	5	19	0	0	0	0	0	0	0	0	0	0	0	0	0	0	0	0	0	0	200	0	0	0	0	0	0	0	0	0	0	0	0	24	0	0	0	0	0	0	0	0
30075	4	1	23.3973	22	43	1	2	5	23	0.05	0.153	0	0.04	0	0	0.243	0	0	0	0	0	0	0	0	0	0	0	400	0	0	0	0	0	0	0	0	0	0	0	0	20	0	0	0	0	0	0	0	0
30091	4	1	20.611	25	43	1	2	5	20	4.627	1.165	0.132	11.311	0	0	17.235	0	20	0	0	0	0	0	0	0	0	0	0	0	200	0	0	0	0	0	0	0	0	0	0	0	0	0	0	0	0	0	0	0
31037	4	2	21.1479	20	8	1	2	5	21	11.967	0.348	0	3.8035	0.0795	0	16.198	0	0	0	0	0	0	0	0	0	400	0	100	0	0	0	0	0	0	0	0	0	0	0	0	15	0	0	0	0	0	0	0	0
33024	4	1	24.8247	79	8	4	2	5	24	2.5185	0.2295	0	4.7455	0	0	7.4935	0	0	0	0	0	0	0	0	0	250	0	40	0	0	0	0	0	0	0	0	0	0	0	0	0	0	0	0	0	0	0	0	0
33034	4	1	19.8274	79	8	4	2	5	19	3.04238	0.5355	0.112	6.1945	0.123	0	10.0074	0	0	0	0	0	0	0	0	0	0	0	250	0	0	0	0	0	0	20	0	0	0	0	0	0	0	0	0	0	0	0	0	0
33057	4	2	24.8466	79	8	4	2	5	24	3.618	1.3201	9.6305	0.04	0	0	14.6086	0	0	0	140	0	0	0	0	0	0	0	200	0	0	0	0	0	0	0	0	0	0	0	0	0	40	0	0	0	0	0	0	0
33114	4	1	19.8548	79	8	4	2	5	19	2.4	0.06	0	0.645	0	0	3.105	0	0	0	0	0	0	0	0	0	0	0	600	0	0	0	0	0	0	0	0	0	0	0	0	0	0	0	0	0	0	0	0	0
33116	4	1	25.0219	79	8	4	2	5	24	2.42712	0.0075	0.07	3.025	0	0	5.52961	0	0	0	0	0	0	0	0	0	0	0	250	0	0	0	0	0	0	0	0	0	0	0	0	30	0	0	0	0	0	0	250	0
33129	4	1	25.0849	79	8	4	2	5	24	6.50031	0.4776	0.308	0.04	0	0	7.32591	0	0	0	0	0	0	0	0	0	0	0	0	0	0	0	0	0	0	0	0	0	0	0	0	0	0	0	0	0	0	0	0	0
33131	4	2	22.4411	529	8	1	2	5	22	0.62446	0.169	0.28	0	0	0	1.07346	0	0	0	140	0	90	0	0	0	0	0	200	0	0	0	0	0	0	0	0	0	0	0	0	15	0	0	0	0	0	0	125	0
33157	4	2	23.4712	79	8	4	2	5	23	0.513018	0.3732	15.1985	0.187	0.123	0	16.3947	0	0	0	0	0	0	0	0	0	0	0	0	0	0	0	0	0	0	0	0	0	0	0	0	160	0	0	0	0	0	0	0	125
33160	4	2	24.0137	79	8	4	2	5	24	0.2444	0.306	0	1.5525	0	0	2.1029	0	0	0	0	0	0	0	0	0	400	0	0	0	0	0	0	0	0	0	0	0	0	0	0	0	0	0	0	0	0	0	0	0
33166	4	2	23.2493	79	8	4	2	5	23	3.75	0.03	0	0	0	0	3.78	0	0	0	0	0	0	0	0	0	0	0	200	0	0	0	0	0	0	0	0	0	0	0	0	0	0	0	0	0	0	0	0	0
34005	4	1	22.4822	80	50	4	2	5	22	0.05	0	0	8.689	0	0	8.739	0	0	0	0	0	0	0	0	0	0	0	440	0	0	0	0	0	0	0	0	0	0	0	0	0	0	0	0	0	0	0	0	0
34011	4	2	19.2219	80	50	4	2	5	19	0.665	0.549	0	0.08	0	0	1.294	0	0	0	0	0	0	0	0	0	0	300	125	0	0	0	0	0	0	0	0	0	0	0	0	0	0	0	0	60	0	0	0	0
34025	4	1	21.9699	80	50	4	2	5	21	0.768	0.2105	0.132	1.9805	0.02	0	3.111	200	0	0	110	0	0	0	0	0	0	0	0	0	0	0	0	0	30	0	0	0	0	0	0	0	0	0	0	0	0	0	0	0
34039	4	1	18.1781	80	50	4	2	5	18	7.31	1.386	0	0.032	0	0	8.728	0	0	0	0	0	0	0	0	0	0	0	60	0	0	0	0	0	0	0	0	0	0	0	0	0	0	0	0	60	0	0	0	0
34043	4	2	22.1973	80	50	4	2	5	22	3.625	0.09	14.008	1.001	0	0	18.724	125	0	0	0	0	0	0	0	0	0	0	125	0	0	0	0	0	0	0	0	0	0	0	0	0	15	0	0	0	0	0	0	0
34046	4	1	24.2986	80	50	4	2	5	24	1.6	0.06	0	0.08	0	0	1.74	0	0	0	0	0	0	0	0	0	0	0	400	0	0	0	0	0	0	0	0	0	0	0	0	0	0	0	0	0	0	0	0	0
35015	4	2	22.0603	70	8	3	2	5	22	5.95296	1.5725	0.098	1.69	0	0	9.31346	0	0	0	0	0	0	0	0	0	0	0	205	0	0	0	0	0	0	0	0	0	0	0	0	0	0	0	0	0	0	0	0	0
35034	4	1	24.274	70	8	3	2	5	24	3.88373	0.3625	0.332	3.02	0	0	7.59823	0	0	0	0	0	0	0	0	0	0	0	165	0	0	0	0	0	0	0	0	0	0	0	0	0	0	0	0	0	0	0	0	0
35044	4	2	23.2137	79	8	4	2	5	23	5.789	1.5575	0.132	11.862	0	0	19.3405	0	0	0	0	0	0	0	0	0	125	0	0	0	0	0	0	0	0	0	0	0	0	0	0	30	0	0	0	0	0	0	0	0
35045	4	2	22.8548	79	8	4	2	5	22	6.61396	0.442	0.098	2.408	0	0	9.56196	0	0	0	0	0	0	0	0	0	165	0	50	0	0	0	0	0	0	0	0	0	0	0	0	70	0	0	0	0	0	0	0	0
35047	4	2	22.6466	70	8	3	2	5	22	4.866	0.388	9.242	0.6044	0.016	0	15.1164	0	0	0	0	0	0	0	0	0	0	0	250	0	0	0	0	0	0	0	0	0	0	0	0	0	30	0	0	0	35	0	0	0
35054	4	2	24.4822	79	8	4	2	5	24	2.40219	0.1515	0.056	6.031	0	0	8.64069	0	0	0	0	0	0	0	0	0	0	140	0	0	0	0	0	0	0	0	0	0	0	0	0	0	0	0	0	30	0	0	0	0
35071	4	1	21.8274	79	8	4	2	5	21	9.3765	1.168	0	0.9677	0.052	0	11.5642	0	0	0	0	0	0	0	0	0	0	0	250	0	0	0	0	0	0	0	0	0	0	0	0	0	0	0	0	40	0	0	0	0
37003	4	2	22.8411	121	3	2	5	5	22	2.24902	0.1455	0.014	5.5986	0	0	8.00712	0	0	0	70	0	0	0	0	0	0	0	0	0	0	0	0	0	0	0	0	0	0	0	0	0	0	0	0	0	0	0	0	0
37046	4	2	18.074	413	3	1	5	5	18	5.74149	1.32486	0.056	4.455	0	2.81	14.3874	0	0	0	0	0	0	0	0	0	300	0	0	0	0	0	0	0	0	0	0	0	0	0	0	0	0	0	0	0	0	0	125	0
38062	4	2	19.126	64	12	2	5	5	19	1.779	0.57	0	4.652	0	0.1425	7.1435	0	0	0	0	0	0	100	0	0	0	0	0	0	0	0	0	0	0	0	0	0	0	0	0	0	0	0	0	0	0	0	0	0
38064	4	2	18.2658	64	12	2	5	5	18	1.875	0	0	6.466	0	0	8.341	0	0	0	0	0	0	0	0	0	0	0	0	0	0	0	0	0	0	0	0	0	0	0	0	15	0	0	0	0	0	0	0	0
38109	4	2	23.1507	45	12	1	5	5	23	8.715	0	0	2.276	0	0	10.991	0	0	0	0	0	0	0	0	0	0	0	200	0	0	0	0	0	0	0	0	0	0	0	0	0	0	0	0	0	0	0	0	0
38119	4	1	19.0247	112	12	3	5	5	19	1.1225	0.115	0	1.44	0	0	2.6775	0	0	0	0	0	0	0	0	0	0	250	0	0	0	0	0	0	0	0	0	0	0	0	0	0	0	0	0	50	0	0	0	0
38130	4	1	19.0356	112	12	3	5	5	19	1.258	0	0	0.1335	0.0615	0	1.453	0	0	0	0	0	0	0	0	0	0	0	250	0	0	0	0	0	0	120	0	0	0	0	0	20	0	0	0	0	0	0	0	0
38136	4	1	23.2438	107	12	2	5	5	23	7.165	0.015	0	8.278	0	0	15.458	0	0	0	0	0	0	0	0	0	0	0	305	0	0	0	0	0	0	0	0	0	0	0	0	0	0	0	0	0	0	0	0	0
38180	4	1	23.9671	115	17	1	2	5	23	1.61569	0.04	0.056	0	0	0	1.71169	0	0	0	0	0	0	0	0	0	0	0	0	0	0	0	0	0	0	0	0	0	0	0	0	0	0	0	0	0	0	0	0	0
38202	4	2	18.4301	530	17	1	2	5	18	3.0835	0.577	0	0.4387	0.3075	0	4.4067	0	0	0	0	0	0	0	0	0	0	0	40	0	0	0	0	0	0	0	0	0	0	0	0	0	0	50	0	0	0	0	125	375
39024	4	1	21.4329	51	35	1	6	5	21	2.775	0	0	0.06	0	0	2.835	0	0	0	100	0	0	0	0	0	0	0	600	0	0	0	0	0	0	0	0	0	0	0	0	30	0	0	0	0	0	0	0	0
39062	4	2	23.0219	85	35	4	6	5	23	2.18469	0.16	0.056	9.387	0	0	11.7877	0	0	0	0	0	0	0	0	0	200	0	30	0	0	0	0	0	0	0	0	0	0	0	0	0	0	0	0	0	0	0	0	0
41009	4	2	21.5014	81	41	4	4	5	21	7.68085	0.459	0.028	2.7225	0	0	10.8903	0	0	0	0	0	0	0	0	0	0	0	100	0	0	0	0	0	0	0	0	0	0	0	0	0	0	0	0	20	0	0	0	0
41016	4	2	19.9945	127	41	2	4	5	20	2.663	0.772	0	4.535	0	0	7.97	0	0	0	0	0	0	0	0	0	0	0	100	0	0	0	0	0	0	0	0	0	0	0	0	0	0	20	0	0	0	0	125	0
41018	4	1	20.8192	226	41	2	4	5	20	0	0.239	0	0	0	0	0.239	0	0	0	125	0	0	0	0	0	0	0	0	0	0	0	0	0	0	0	0	0	0	0	0	0	0	0	0	0	0	0	0	0
41025	4	1	20.6986	81	41	4	4	5	20	3.8	0.153	14.008	0.04	0	0	18.001	0	0	0	100	0	0	0	0	0	0	0	100	0	0	0	0	0	0	0	0	0	0	0	0	60	0	0	0	30	0	0	0	0
81113	4	2	18.8493	78	28	4	1	5	18	7.841	0.337	0	11.751	0	0	19.929	0	0	0	0	0	0	0	0	0	0	0	400	0	0	0	0	0	0	0	0	0	0	0	0	0	0	0	0	15	0	0	125	0
81117	4	2	22.7315	78	28	4	1	5	22	0.030846	0.612	0.028	0	0	0	0.670846	0	0	0	0	0	0	0	0	0	200	0	0	0	0	0	0	0	0	0	0	0	0	0	0	0	0	0	0	0	0	0	0	0
81120	4	1	21.4466	419	28	3	1	5	21	3.604	1.962	0.05	0.87	0	0	6.486	0	0	0	0	0	0	0	0	0	100	0	50	0	0	0	0	0	0	0	0	0	0	0	0	0	0	0	0	0	0	0	0	0
81227	4	2	23.9452	78	28	4	1	5	23	15.6652	2.567	0	0.12	0	0	18.3522	0	0	0	0	0	0	0	0	0	50	0	0	0	0	0	0	0	0	0	0	0	0	0	0	0	0	0	0	0	0	20	0	0
81232	4	2	18.7945	78	28	4	1	5	18	1.808	0.03	0	0.2735	0.0615	0	2.173	0	0	0	0	0	0	0	0	0	0	0	0	0	0	0	0	0	0	0	0	0	0	0	0	0	0	0	0	0	0	0	0	0
81323	4	2	18.5616	78	28	4	1	5	18	2.962	0.015	0	14.136	0	0	17.113	0	0	0	0	0	0	0	0	0	0	0	225	0	0	0	0	0	0	0	0	0	0	0	0	0	0	0	0	50	0	0	0	0
81418	4	2	19.5863	536	28	1	1	5	19	10.2599	0.324	0.112	3.025	0	0	13.7209	0	0	0	0	0	0	0	0	0	0	0	250	0	0	0	0	0	0	0	0	0	0	0	0	0	0	0	0	30	0	0	125	0
81429	4	2	23.4356	78	28	4	1	5	23	3.742	0.03	0	15.406	0	0	19.178	0	0	0	0	0	0	0	0	0	0	450	0	0	0	0	0	0	0	0	0	0	0	0	0	0	0	0	0	0	0	0	0	0
81502	4	2	19.4658	78	28	4	1	5	19	0	0	0	0.35	0	0	0.35	0	0	0	150	0	0	0	0	0	400	0	0	0	0	0	0	0	0	0	0	0	0	0	15	0	0	0	0	0	0	0	0	0
81523	4	2	21.2466	78	28	4	1	5	21	3.742	0.03	0	15.406	0	0	19.178	0	0	0	0	0	0	0	0	0	0	450	0	0	0	0	0	0	0	0	0	0	0	0	0	0	0	0	0	0	0	0	0	0
85002	4	2	18.2	119	29	3	4	5	18	1.0915	0.8075	0	4.6265	0	0	6.5255	0	0	0	0	0	0	0	0	0	0	0	200	0	0	0	0	0	0	0	0	0	0	0	0	0	0	0	0	30	0	0	0	0
85035	4	1	24.9068	119	29	3	4	5	24	0.53	0.615	0	2.023	0.12	0	3.288	0	0	0	0	0	0	0	0	0	0	0	0	200	0	0	0	0	0	0	0	0	0	0	0	0	0	0	0	0	0	0	0	250
87021	4	2	19.5151	230	30	3	5	5	19	0.0481345	0	0.021	4.98	0	0	5.04913	200	0	0	0	0	0	0	0	0	200	0	0	0	0	0	0	0	0	0	0	0	0	0	0	0	0	0	0	0	0	0	0	0
87028	4	1	18.0603	220	30	1	5	5	18	9.76123	0.41	0.14	0	0	0	10.3112	0	0	0	0	0	0	0	0	0	0	0	200	0	0	0	0	0	0	0	0	0	0	0	0	0	0	0	0	0	0	0	0	0
87037	4	2	20.4384	221	30	1	5	5	20	5.186	0.015	0.085	4.70234	2.692	0	12.6803	0	0	0	0	0	0	0	0	0	0	0	0	0	0	0	0	0	0	0	0	0	0	0	0	0	0	0	0	0	0	0	0	0
88001	4	2	22.7808	84	46	4	5	5	22	7.6625	0	0	0.608	0	0	8.2705	0	0	0	0	0	0	0	0	0	0	220	0	0	0	0	0	0	0	0	0	0	0	0	0	0	80	0	0	0	0	0	0	0
88010	4	2	24.2329	128	46	2	5	5	24	0.55	0	0	11.2276	0	0	11.7776	0	0	0	0	0	0	0	0	0	0	0	0	0	0	0	0	0	0	0	0	0	0	0	0	0	0	0	0	40	0	0	0	0
88011	4	2	23.2548	131	46	2	5	5	23	1.3875	0.306	0	0.605	0	0	2.2985	0	0	0	0	0	0	0	0	0	200	0	0	0	0	0	0	0	0	0	0	0	0	0	0	0	0	0	0	0	0	0	0	0
88051	4	2	24.4712	84	46	4	5	5	24	0.452	0.738	0	0	0	0	1.19	0	0	0	0	0	0	0	0	0	0	250	200	0	0	0	0	0	0	0	0	0	0	0	0	0	0	0	0	0	0	0	0	0
88069	4	2	20.7534	129	46	1	5	5	20	0.4544	0.153	0	18.9252	0	0	19.5326	0	0	0	0	0	0	0	0	0	0	0	400	0	0	0	0	0	0	0	0	0	0	0	0	40	0	0	0	0	0	0	0	0
88106	4	1	19	84	46	4	5	5	19	17.6014	0.273	0.112	1.2106	0.024	0	19.221	0	0	0	140	0	0	0	0	0	0	0	200	0	0	0	0	0	0	0	0	0	0	0	0	0	0	0	0	0	0	0	0	0
40015	1	1	2.90137	77	38	3	6	1	2	1.4155	0	0	0.245	0	0	1.6605	0	0	0	0	0	0	0	0	0	0	0	900	0	0	0	0	0	0	0	0	0	0	0	0	0	0	0	0	0	0	0	125	0
5040	1	2	5.20822	83	48	4	3	1	5	0.5055	0.0225	0	21.6845	0	0	22.2125	0	0	0	0	0	0	0	0	0	0	0	250	0	0	0	0	0	0	120	0	0	0	0	0	0	0	0	0	0	0	0	0	0
21017	1	1	3.9726	127	41	2	4	1	3	25.7485	0.06	0	4.7255	0	0.25	30.784	0	0	0	0	0	0	0	0	0	0	0	400	0	0	0	0	0	0	60	0	0	0	0	0	0	0	0	0	0	0	0	0	0
73003	1	2	3.8274	18	8	1	2	1	3	6.1944	0.03	0	18.2172	0	0	24.4416	0	0	0	125	0	0	0	0	0	0	0	500	0	0	0	0	0	0	0	0	0	0	0	0	0	0	0	0	20	0	0	0	0
3088	1	2	2.07123	73	39	3	3	1	2	0.337	0.0105	0	9.331	0	0	9.6785	0	0	0	0	0	0	0	0	0	0	0	600	0	0	0	0	0	0	120	0	0	0	0	0	0	0	0	0	0	0	0	0	0
4040	1	2	4.10411	420	39	3	3	1	4	1.574	0	0	18.662	0	0	20.236	0	0	0	0	0	0	0	0	0	0	0	400	0	0	0	0	0	0	0	0	0	0	0	0	0	0	0	0	15	0	0	0	0
5023	1	2	5.25205	83	48	4	3	1	5	8.465	0.815	0	0	0	0	9.28	200	0	0	0	0	0	0	0	0	0	0	0	0	0	0	0	0	0	0	0	0	0	0	0	0	0	0	0	0	0	0	0	0
5024	1	2	4.50411	83	48	4	3	1	4	8.465	0.815	0	1.86	0	0	11.14	200	0	0	0	0	0	0	0	0	0	0	0	0	0	0	0	0	0	0	0	0	0	0	0	0	0	0	0	0	0	0	0	0
5032	1	2	3.36986	83	48	4	3	1	3	0.674	0.0375	10.506	18.662	0	0	29.8795	0	0	0	0	0	0	0	0	0	0	0	500	0	0	0	0	0	0	0	0	0	0	0	0	0	0	0	0	20	0	0	125	0
10007	1	1	3.10685	78	28	4	1	1	3	1.724	0	0	18.662	0	0	20.386	0	0	0	0	0	0	0	0	0	0	0	300	0	0	0	0	0	0	0	0	0	0	0	0	0	0	0	0	0	0	0	0	0
11058	1	1	2.92329	69	47	3	1	1	2	2.7635	0.345	0	0	49.782	0	52.8905	0	0	0	0	0	0	0	0	0	0	0	900	0	0	0	0	0	0	180	0	0	0	0	0	0	0	0	0	0	0	0	0	0
14032	1	2	5.71781	206	13	1	1	1	5	4.575	0.2295	8.755	13.118	0.3255	0	27.003	0	0	0	0	0	0	0	0	0	0	0	375	0	0	0	0	0	0	0	0	0	0	0	0	0	0	0	0	0	0	0	0	0
14061	1	1	3.05753	206	13	1	1	1	3	0	0	0	0	103.713	0	103.713	0	0	0	0	0	0	0	0	0	0	0	625	0	0	0	0	0	0	60	0	0	0	0	0	0	0	0	0	0	0	0	0	0
14062	1	1	1.98356	204	13	1	1	1	2	1.1552	0	0	19.0996	0	0	20.2548	0	0	0	0	0	0	0	0	0	0	0	400	0	0	0	0	0	0	0	0	0	0	0	0	0	0	0	0	0	0	0	0	0
14063	1	1	2.29041	67	13	3	1	1	2	0.01	0	0	0.008	0	0	0.018	0	0	0	110	0	0	0	0	0	0	0	125	0	0	0	0	0	0	60	0	0	0	0	0	0	0	0	0	0	0	0	0	0
14064	1	1	4.90959	67	13	3	1	1	4	29.976	0	0	5.8535	0	0.3	36.1295	0	0	0	0	0	0	0	0	0	0	0	500	0	0	0	0	0	0	0	0	0	0	0	0	0	0	0	0	0	0	0	0	0
14066	1	1	2.72055	207	13	1	1	1	2	3.763	0	0	38.05	0	0	41.813	0	0	0	110	0	0	0	0	0	0	0	450	0	0	0	0	0	0	0	0	0	0	0	0	0	0	0	0	0	0	0	0	0
17063	1	1	2.8411	54	13	2	1	1	2	24.718	0.0075	0	21.448	0.465	0.175	46.8135	0	0	0	0	0	0	0	0	0	0	0	400	0	0	0	0	0	0	0	0	0	0	0	0	0	0	0	0	60	0	0	0	0
21004	1	1	3.06575	81	41	4	4	1	3	0.083	0	0	10.2615	0.0615	0	10.406	200	0	0	0	0	0	0	0	0	0	0	0	0	0	0	0	0	0	60	0	0	0	0	0	0	0	0	0	0	0	0	0	0
22076	1	1	3.61096	104	4	1	4	1	3	4.17735	0.07022	0.028	16.5835	0.2325	0	21.0916	0	0	0	125	0	0	0	0	0	0	0	250	0	0	0	0	0	0	120	0	0	0	0	0	0	0	0	0	0	0	0	0	0
24033	1	2	5.79726	60	23	2	4	1	5	2.924	0.306	0	18.662	0	0	21.892	200	0	0	135	0	150	0	0	0	0	0	400	0	0	0	0	0	0	0	0	0	0	0	0	0	0	0	0	0	0	0	0	0
25017	1	2	2.88219	120	41	2	4	1	2	8.177	0	0	13.175	0	0	21.352	0	0	0	0	0	0	0	0	0	0	0	200	0	0	0	0	0	0	0	0	0	0	0	0	0	30	0	0	0	0	0	0	0
25028	1	2	5.92877	120	41	2	4	1	5	3.8215	0	0	24.6995	0.2325	0	28.7535	0	0	0	0	0	0	0	0	0	0	0	400	0	0	0	0	0	0	0	0	0	0	0	0	0	0	0	0	0	0	0	0	0
25062	1	1	3.48219	120	41	2	4	1	3	5.50211	0.63	0.07	0.602	0.733	0	7.53712	0	0	0	125	0	0	0	0	0	0	0	0	0	0	0	0	0	0	0	0	0	0	0	0	0	0	0	0	0	0	0	0	0
29002	1	1	2.19452	58	8	2	2	1	2	6.2744	0.0765	0	19.6027	0	0	25.9536	0	0	0	0	0	0	0	0	0	0	0	250	0	0	0	0	0	0	0	0	0	0	0	0	0	0	0	0	0	0	0	0	0
29014	1	1	2.22466	58	8	2	2	1	2	2.1345	0.015	6.723	5.535	0.1395	0	14.547	0	0	0	0	0	0	0	0	0	0	0	200	0	0	0	0	0	0	60	0	0	0	0	0	40	0	0	0	0	0	0	0	0
29020	1	2	5.8137	58	8	2	2	1	5	8.984	0.06	0	17.6785	0	0	26.7225	200	0	0	0	0	0	0	0	0	0	0	150	0	0	0	0	0	0	0	0	0	0	0	0	0	0	0	0	0	0	0	125	0
30040	1	2	3.97808	23	43	1	2	1	3	11.3532	0.306	0	31.9998	0.81375	0	44.4729	0	0	0	0	0	0	0	0	0	0	200	200	0	0	0	0	0	0	0	0	0	0	0	0	0	0	0	0	0	0	0	0	0
30060	1	2	3.33425	24	43	1	2	1	3	14.136	0.5325	0	9.333	0.08	0	24.0815	0	0	0	0	0	0	0	0	0	0	0	300	0	0	0	0	0	0	0	0	0	0	0	0	20	0	0	0	0	0	0	0	0
31032	1	1	5.25479	20	8	1	2	1	5	7.683	17.5335	14.8835	3.331	0	0	43.431	0	0	0	0	0	0	0	0	0	0	0	0	0	0	0	0	0	0	0	0	0	0	0	0	0	0	0	0	0	0	0	0	0
34078	1	1	4.45479	80	50	4	2	1	4	0.674	0.459	0	23.467	0	0	24.6	0	0	0	0	0	0	0	0	0	0	0	400	0	0	0	0	0	0	100	0	0	0	0	0	0	0	0	0	0	0	0	0	0
35067	1	1	1.93699	70	8	3	2	1	2	10.7157	0.06	0	24.4247	0.61125	0	35.8118	0	0	0	0	0	0	0	0	0	0	0	120	0	0	0	0	0	0	0	0	0	0	0	0	0	0	0	0	15	0	0	0	0
37021	1	2	2.23836	121	3	2	5	1	2	20.0516	0.10122	9.6935	1.3454	0.9	0	32.0917	0	0	0	0	0	0	0	0	0	0	0	0	0	0	0	0	0	0	0	0	0	0	0	0	0	0	0	0	0	0	0	125	0
38003	1	2	4.46027	64	12	2	5	1	4	1.011	0	0	33.3095	0	0	34.3205	0	0	0	0	0	0	0	0	0	600	0	0	0	0	0	0	0	0	0	0	0	0	0	0	25	0	0	0	0	0	0	0	0
38138	1	1	5.16986	114	17	3	2	1	5	5.96921	0.0045	0.007	25.871	0	0	31.8517	0	0	0	0	0	0	0	0	0	0	0	500	0	0	0	0	0	0	0	0	0	0	0	0	0	0	0	0	25	0	0	0	0
38139	1	1	2.34521	114	17	3	2	1	2	5.2795	0	0	18.1685	83.2025	0	106.65	0	0	0	135	0	0	0	0	0	0	0	50	0	200	0	0	0	0	0	0	0	0	0	0	0	0	0	0	25	0	0	0	0
38154	1	2	2.44384	114	17	3	2	1	2	0.946558	0.08	22.445	0.025	0	0	23.4966	0	0	0	0	0	0	0	0	0	0	0	0	0	0	0	0	0	0	0	0	0	0	0	0	0	0	0	0	0	0	0	0	0
39031	1	1	3.01096	85	35	4	6	1	3	2.868	0.0705	0	7.0703	0.198	0	10.2068	0	0	0	0	0	0	0	0	0	0	0	700	0	0	0	0	0	0	0	0	0	0	0	0	0	0	0	0	0	0	0	0	0
39056	1	2	4.92329	85	35	4	6	1	4	1.5	0	1.84	5.766	0	0	9.106	0	0	0	0	0	50	0	0	0	0	0	400	0	0	0	0	0	0	0	0	0	0	0	0	0	0	0	0	0	0	0	0	0
41029	1	2	3.3589	81	41	4	4	1	3	0.337	0.153	0	9.331	0	0	9.821	0	0	0	0	0	0	0	0	0	0	0	300	0	0	0	0	0	0	60	0	0	0	0	0	0	0	0	0	30	0	0	0	0
73002	1	1	3.63836	18	8	1	2	1	3	0.275	0.0075	0	1.962	0	0	2.2445	0	0	0	0	0	40	0	0	0	0	0	400	0	0	0	0	0	0	0	0	0	0	0	0	0	45	0	0	0	0	0	125	0
87005	1	2	3.30685	230	30	3	5	1	3	5.369	2.28	0	24.979	0	0	32.628	0	0	0	0	0	0	0	0	0	0	0	200	0	0	0	0	0	0	0	0	0	0	0	0	0	0	0	0	0	0	0	0	0
2003	1	1	4.2274	62	33	2	3	1	4	1.574	0.015	0	19.782	0	0	21.371	0	0	0	0	0	0	0	0	0	0	0	400	0	0	0	0	0	0	0	0	0	0	0	0	0	0	0	0	0	0	0	0	0
2007	1	1	5.16164	62	33	2	3	1	5	26.021	0.4825	0	13.4505	1.125	0	41.079	0	0	0	100	0	0	0	0	0	0	450	0	0	0	0	0	0	0	60	0	0	0	0	0	0	0	0	15	0	0	0	125	0
2012	1	2	4.83014	62	33	2	3	1	4	3.1475	0	21.8875	11.8035	0.2325	0	37.071	0	0	100	0	0	0	0	0	0	0	0	450	0	0	0	0	0	0	0	0	0	0	0	0	0	0	0	0	0	0	0	0	0
3019	1	2	2.71507	44	39	1	3	1	2	8.30475	0.4025	0	17.1618	0.58125	0	26.4503	0	0	0	0	0	0	0	0	0	0	0	400	0	0	0	0	0	0	0	0	0	0	0	0	0	0	0	0	0	0	0	125	0
3020	1	1	2.76438	44	39	1	3	1	2	4.5315	0.03	0	19.7565	0.186	0	24.504	0	0	0	0	0	0	0	0	0	0	0	600	0	0	0	0	0	0	60	0	0	0	0	0	0	0	0	0	0	0	0	0	0
3038	1	2	4.03836	44	39	1	3	1	4	5.99027	0.03	0.042	2.934	0	0	8.99627	0	0	0	0	0	0	0	0	0	0	0	400	0	0	0	0	0	0	0	0	0	0	0	0	0	0	0	0	0	0	0	0	0
3127	1	2	1.67123	73	39	3	3	1	1	0	0.015	0	0.57	0	0.0855	0.6705	0	0	0	0	0	0	0	0	0	0	0	600	0	0	0	0	0	0	0	0	0	0	0	0	0	0	0	0	0	0	0	125	0
3163	1	1	4.61918	73	39	3	3	1	4	7.9635	0.03	0	16.7405	0.465	0	25.199	0	0	0	0	0	0	0	0	0	0	0	250	0	0	0	0	0	0	0	0	0	0	0	0	0	0	0	0	0	0	0	0	0
3189	1	2	4.37534	117	39	1	3	1	4	0.337	0.009	0	9.331	0	0	9.677	0	0	0	0	0	0	0	0	0	0	0	500	0	0	0	0	0	0	0	0	0	0	0	0	0	0	0	0	0	0	0	125	0
5006	1	2	5.68493	83	48	4	3	1	5	10.387	0.0225	0	18.727	0	0	29.1365	0	0	0	0	0	0	0	0	0	0	0	300	0	0	0	0	0	0	0	0	0	0	0	0	0	0	0	0	0	0	0	125	0
5031	1	2	3.66301	83	48	4	3	1	3	8.49919	0	14.064	5.7158	0	0	28.279	0	0	0	0	0	0	0	0	0	0	0	400	0	0	0	0	0	0	180	0	0	0	0	0	0	0	0	0	0	0	0	0	0
5200	1	1	4.70411	510	20	3	3	1	4	2.061	0.0225	0	29.4655	0	0	31.549	0	0	0	0	0	0	0	0	0	750	0	0	0	0	0	0	0	0	0	0	0	0	0	0	0	0	0	0	0	0	0	125	0
5305	1	2	5.48219	510	20	3	3	1	5	1.7138	0.015	0	19.1384	0	0	20.8672	0	0	0	0	0	0	0	0	0	0	0	100	0	0	0	0	0	0	0	0	0	0	0	0	0	0	0	0	0	0	0	0	0
5369	1	1	4.59452	510	20	3	3	1	4	0.9436	0.0075	0	26.1268	0	0	27.0779	200	0	0	0	0	0	0	0	0	0	0	300	0	0	0	0	0	0	0	0	0	0	0	0	0	0	0	0	10	0	0	0	0
8008	1	1	4.73973	417	28	1	1	1	4	16.9015	0.138	0	3.5891	0.3905	0	21.0191	0	0	0	0	0	0	0	0	0	0	0	0	0	600	0	0	0	0	0	60	0	0	0	0	0	0	0	0	0	0	0	0	0
11097	1	2	4.85479	69	47	3	1	1	4	3.749	0.3115	0	0.0004	0.016	0	4.0769	0	0	0	0	0	0	0	0	0	0	400	0	0	0	0	0	0	0	0	0	0	0	0	0	0	0	0	0	0	0	0	0	0
13027	1	2	4.61918	46	46	1	5	1	4	3.858	1.0765	0	22.9735	0	0	27.908	0	0	0	0	0	0	0	0	0	0	0	800	0	0	0	0	0	0	60	0	0	0	0	0	0	55	0	0	0	0	0	0	0
14012	1	2	2.62192	133	13	2	1	1	2	0.347	0	0	9.339	0	0	9.686	0	0	0	0	0	0	0	0	0	0	0	375	0	0	0	0	0	0	0	0	0	0	0	0	0	0	0	0	0	0	0	0	0
14059	1	1	3.39178	134	13	2	1	1	3	7.9972	0.03	0	17.7236	0.465	0	26.2158	0	0	0	0	0	0	0	0	0	0	0	600	0	0	0	0	0	0	0	0	0	0	0	0	0	0	0	0	0	0	0	0	0
14065	1	1	2.2411	137	13	2	1	1	2	1.017	0.077	0	19.747	0	0	20.841	0	0	0	0	0	0	0	0	0	0	0	600	0	0	0	0	0	0	0	0	0	0	0	0	0	0	0	0	0	0	0	0	0
16049	1	1	2.53699	53	6	2	1	1	2	0.45	0.0165	0	2.79	145.197	0	148.454	0	0	0	0	0	0	0	0	0	0	0	0	0	0	0	0	0	0	0	0	0	0	0	0	0	0	0	0	0	0	0	125	0
17064	1	2	4.81096	54	13	2	1	1	4	0	0.015	19.261	2.945	0	0	22.221	0	0	0	0	0	0	0	0	0	0	0	200	0	0	0	0	0	0	0	0	0	0	0	0	0	0	0	0	0	0	0	0	0
21027	1	1	2.22466	81	41	4	4	1	2	2.731	0.815	0	11.191	0	0	14.737	0	0	0	0	0	0	0	0	0	0	0	200	0	0	0	0	0	0	60	0	0	0	0	0	0	0	0	0	0	0	0	0	0
21028	1	2	3.10959	81	41	4	4	1	3	2.0655	0	0	9.1205	0	0	11.186	0	0	0	0	0	0	0	0	0	0	0	200	0	0	0	0	0	0	60	0	0	0	0	0	0	0	0	0	0	0	0	0	0
21046	1	2	3.08219	81	41	4	4	1	3	2.0655	0	0	9.1205	0	0	11.186	0	0	0	0	0	0	0	0	0	0	0	150	0	0	0	0	0	0	60	0	0	0	0	0	0	0	0	0	0	0	0	0	0
22001	1	2	4.65753	72	23	3	4	1	4	0	0.153	0	0.05	0	0	0.203	0	0	0	0	0	0	0	0	0	0	0	200	0	0	0	0	0	0	0	0	0	0	0	0	0	0	0	0	0	0	0	0	0
22054	1	2	3.71507	72	23	3	4	1	3	0.9	0	0	0	103.713	0	104.612	0	0	0	10	0	0	0	0	0	0	0	500	0	0	0	0	0	0	0	0	0	0	0	0	0	0	0	0	0	0	0	125	0
24008	1	1	3.51233	60	23	2	4	1	3	14.2875	0.2295	4.6	2.48	0.675	0	22.272	0	0	0	0	0	0	0	0	0	0	0	775	0	0	0	0	0	0	0	0	0	0	0	0	0	0	0	0	0	0	0	0	0
24022	1	2	5.05205	60	23	2	4	1	5	11.5138	0.459	0	18.662	0	0	30.6348	0	0	0	0	0	0	0	0	0	0	0	600	0	0	0	0	0	0	0	0	0	0	0	0	0	0	0	0	0	0	0	0	0
24029	1	2	3.87397	60	23	2	4	1	3	0.4018	0.2405	0	0	82.97	0	83.6123	0	0	0	0	0	0	0	0	0	0	0	180	0	0	0	0	0	0	0	0	0	0	0	0	0	0	0	0	0	0	0	0	0
27034	1	2	5.96164	56	8	2	2	1	5	2.161	1.2334	0	25.2647	0.09225	0	28.7514	0	0	0	0	0	0	0	0	0	0	0	350	0	0	0	0	0	0	60	0	0	0	0	0	0	0	0	0	0	0	0	0	0
27051	1	1	4.24658	56	8	2	2	1	4	1.9995	0.2858	0	4.4132	103.721	0	110.419	0	0	0	0	0	0	0	0	0	0	0	200	0	0	0	0	0	0	0	0	0	0	0	0	0	20	0	0	0	0	0	0	125
27055	1	2	3.92877	56	8	2	2	1	3	0	0.153	0	3.844	0	0	3.997	0	0	0	0	0	0	0	0	0	0	0	50	0	0	0	0	0	0	180	0	0	0	0	5	0	0	0	0	0	0	0	125	0
28008	1	1	5.73699	57	8	2	2	1	5	1.16738	0.406	0.112	0	0	0	1.68538	0	0	0	125	0	0	0	0	0	0	0	300	0	200	0	0	0	0	0	0	0	0	0	0	0	0	0	0	0	0	0	0	0
28017	1	2	1.6274	57	8	2	2	1	#NULL!	9.19	0.03	0	13.043	0.465	0	22.728	0	0	0	0	0	0	0	0	0	0	0	250	0	0	0	0	0	0	60	0	0	0	0	0	0	0	0	0	0	0	0	0	0
28025	1	1	3.33151	57	8	2	2	1	3	6.88075	0.0975	10.506	7.85125	0.25575	0	25.5912	0	0	0	0	0	0	0	0	0	200	0	0	0	0	0	0	0	0	0	60	0	0	0	0	0	0	0	0	0	0	0	0	0
28063	1	1	4.60274	71	8	3	2	1	4	5.4025	0.433	0	7.975	82.97	0	96.7805	0	0	0	100	0	0	0	0	0	0	0	200	0	0	0	0	0	0	60	0	0	0	0	0	0	0	0	0	0	0	0	0	0
30020	1	2	5.61096	21	43	1	2	1	5	10.275	0	0	22.85	0	0	33.125	200	0	0	0	0	0	0	0	0	0	0	0	0	0	0	0	0	0	0	0	0	0	0	0	0	0	0	0	0	0	0	125	0
30024	1	1	4.71507	21	43	1	2	1	4	22.7592	0.429	0.056	0.1006	0.699	0	24.0438	0	0	0	0	0	0	0	0	0	0	0	390	0	0	0	0	0	0	0	0	0	0	0	0	0	0	0	0	0	0	0	0	0
30058	1	1	4.89863	24	43	1	2	1	4	7.2185	0.153	17.51	9.9685	0	0	34.85	0	0	0	100	0	100	0	0	0	0	0	250	0	0	0	0	0	0	0	0	0	0	0	0	20	0	0	0	0	0	0	125	0
30089	1	1	5.93425	22	43	1	2	1	5	15.4491	0.93633	0.168	9.331	0	0	25.8844	0	0	0	0	0	0	0	0	0	200	0	0	0	0	0	0	0	0	0	0	0	0	0	0	20	0	0	0	0	0	0	0	0
31006	1	2	4.27671	86	8	2	2	1	4	7.30813	0.1342	0.021	3.24	0	0	10.7033	0	0	0	0	0	0	0	0	0	250	0	0	0	0	0	0	0	0	0	0	0	0	0	0	0	0	0	0	0	0	0	0	0
33012	1	2	3.93973	79	8	4	2	1	3	21.914	0.2465	0.28	10.8035	0.9	0	34.144	0	0	0	0	100	0	0	0	0	0	0	200	0	0	0	0	0	0	0	0	0	0	0	0	0	0	0	0	0	0	0	0	0
33035	1	1	5.0274	79	8	4	2	1	5	6	0.0375	29.767	0	0	0	35.8045	0	0	0	0	0	0	0	0	0	0	0	500	0	0	0	0	0	0	0	0	0	0	0	0	120	0	0	0	0	0	0	0	0
33058	1	1	3.23836	79	8	4	2	1	3	5.67896	0.9445	0.098	21.247	0	0	27.9685	0	0	0	0	0	0	0	0	0	0	0	400	0	0	0	0	0	0	120	0	0	0	0	0	0	0	0	0	0	0	0	0	0
33118	1	2	4.06027	79	8	4	2	1	4	13.3692	0.48333	0.28	16.8263	0.62775	0	31.5865	0	0	0	0	0	50	0	0	0	0	0	900	0	0	0	0	0	0	0	0	0	0	0	0	30	0	0	0	0	0	0	0	0
33121	1	1	5.63836	79	8	4	2	1	5	23.8141	0.35455	0.252	21.1537	1.42575	0	47.0001	0	0	0	0	100	70	0	0	0	0	0	250	0	0	0	0	0	0	0	0	0	0	0	0	30	0	0	0	0	0	0	0	0
37016	1	1	3.24658	121	3	2	5	1	3	0.560634	0.015	15.0865	9.331	0	0	24.9931	200	0	0	0	0	0	0	0	0	0	500	0	0	0	0	0	0	0	0	0	0	0	0	0	0	0	0	0	0	0	0	0	0
37017	1	2	1.5863	121	3	2	5	1	#NULL!	3.8278	0	0	30.6996	6.489	0	41.0164	0	0	0	110	0	0	0	0	0	600	0	0	0	0	0	0	0	0	0	0	0	0	0	10	0	0	0	0	0	0	0	125	0
38185	1	2	5.84932	530	17	1	2	1	5	0.7472	0.5125	17.51	18.7546	0	0	37.5243	0	0	0	0	0	0	0	0	0	0	0	250	0	0	0	0	0	0	0	0	0	0	0	0	0	0	0	0	0	0	0	65	0
38207	1	1	3.24932	531	17	3	2	1	3	1.03413	0.0075	10.527	28.693	0	0	40.2616	0	0	0	0	0	0	0	0	0	0	0	600	0	0	0	0	0	0	0	0	0	0	0	0	0	0	0	0	0	0	0	125	0
39015	1	1	3.0411	85	35	4	6	1	3	0.634	0.062	0	5.766	0	0	6.462	0	0	0	0	0	0	0	0	0	0	0	0	0	0	0	0	0	0	0	0	0	0	0	0	0	0	0	0	0	0	0	0	0
39026	1	1	2.38356	85	35	4	6	1	2	25.734	0	0	1.308	0	0.2	27.242	100	0	0	0	0	0	0	0	0	0	0	0	0	0	0	0	0	0	0	0	0	0	0	0	0	50	0	0	0	0	0	0	0
39079	1	1	2.58082	52	35	1	6	1	2	38.337	0.667	0	8.172	0	0	47.176	0	0	0	320	0	0	0	0	0	0	650	0	0	0	0	0	0	0	0	0	0	0	0	0	0	0	0	0	0	0	0	0	0
40004	1	2	2.31507	77	38	3	6	1	2	10.605	0.774	0.007	32.3979	0.3255	0	44.1094	0	0	0	140	0	0	0	0	0	0	0	1140	0	0	0	0	0	0	0	0	0	0	0	0	0	0	0	0	0	0	0	0	0
87001	1	2	3.76438	217	30	1	5	1	3	3.817	0.4025	0	9.856	103.713	0	117.788	0	0	0	0	0	0	0	0	0	400	0	0	0	0	0	0	0	0	0	0	0	0	0	0	0	0	0	0	0	0	0	0	0
88015	1	1	2.37808	132	46	1	5	1	2	15.7375	0.0765	0	30.1875	1.1625	0	47.164	0	0	0	0	0	0	0	0	0	0	0	0	0	0	0	0	0	0	0	0	0	0	0	0	0	0	0	0	0	0	0	375	0
89011	1	1	3.13151	82	29	4	4	1	3	1.237	0	22.763	14.136	0	0	38.136	0	0	0	0	0	0	0	0	0	0	0	200	0	0	0	0	0	0	0	0	0	0	0	0	0	0	0	0	40	0	0	0	0
39080	2	2	7.09315	52	35	1	6	2	7	1.094	0.082	0	0.0004	0.016	0	1.1924	0	0	0	0	0	0	0	0	0	0	0	500	0	0	0	0	0	0	0	0	0	0	0	40	0	0	0	0	0	0	0	0	0
3100	2	1	6.53699	73	39	3	3	2	6	34.227	0	0	13.041	0	0.1	47.368	0	0	0	0	0	0	0	0	0	0	0	400	0	0	0	0	0	0	0	0	0	0	0	0	0	0	0	0	0	0	0	0	0
5510	2	1	6.4274	75	1	3	3	2	6	1.011	0.015	0	31.837	0	0	32.863	0	0	0	140	0	0	0	0	0	0	0	200	0	0	0	0	0	0	0	0	0	0	0	0	0	0	0	0	20	0	0	0	0
6010	2	1	7.76164	5	9	1	1	2	7	6.98281	0.192	0.035	28.9258	0.39525	0	36.5308	0	0	0	0	0	0	0	0	0	0	0	200	0	0	0	0	0	0	60	0	0	0	0	0	0	0	0	0	0	0	0	0	0
14071	2	1	8.69041	67	13	3	1	2	8	2.7595	0.8865	0	23.6065	0	0	27.2525	0	0	0	0	0	0	0	0	0	0	0	450	0	0	0	0	0	0	0	0	0	0	0	0	0	0	0	0	0	0	0	0	0
31017	2	2	11.5781	86	8	2	2	3	11	0	0.0075	0	4.805	0	0	4.8125	0	0	0	0	0	0	0	0	0	0	0	0	0	0	0	0	0	0	0	0	0	0	0	0	5	0	0	0	0	0	0	0	0
2018	2	1	9.21918	62	33	2	3	2	9	1.837	0	26.265	10.106	0	0	38.208	0	0	0	0	0	0	0	0	0	250	0	250	0	0	0	0	0	0	0	0	0	0	0	0	0	0	0	0	0	0	0	125	0
2026	2	2	7.09315	62	33	2	3	2	7	7.795	0.22	26.265	0.009	0.04	0	34.329	0	0	0	0	0	0	0	0	0	0	0	190	0	0	0	0	0	0	0	0	0	0	0	0	0	0	0	0	0	0	0	0	0
2045	2	2	11.7178	500	33	3	3	3	11	6.1295	0	0	14.2873	5.95625	0	26.373	0	0	0	0	0	0	0	0	0	300	0	0	0	0	0	0	0	0	0	0	0	0	0	0	0	0	0	0	0	0	0	0	0
3009	2	1	10.2466	44	39	1	3	3	10	10.9635	0	0	16.7405	0.465	0	28.169	0	0	0	0	0	0	0	0	0	0	0	250	0	0	0	0	0	0	0	0	0	0	0	0	0	0	0	0	0	0	0	0	0
3082	2	1	8.24384	73	39	3	3	2	8	2.587	0.254	0	21.948	0	0	24.789	0	0	0	0	0	0	0	0	0	0	0	450	0	0	0	0	0	0	0	0	0	0	0	0	0	0	0	0	0	0	0	0	0
3085	2	1	9.72055	73	39	3	3	2	9	22.4335	0.075	0	12.571	0.9	0	35.9795	0	0	0	0	0	0	0	0	0	500	0	0	0	0	0	0	0	0	0	0	0	0	0	0	0	0	0	0	0	0	0	0	0
3105	2	2	6.07123	73	39	3	3	2	6	9.611	0.0225	0	23.863	0.6975	0	34.194	0	0	0	0	0	0	0	0	0	0	200	0	0	0	0	0	0	0	0	0	0	0	0	0	0	0	0	0	0	0	0	0	0
3108	2	2	6.37534	73	39	3	3	2	6	14.2585	0	0	28.8155	0.93	0	44.004	0	0	0	0	0	0	0	0	0	0	0	250	0	0	0	0	0	0	0	0	0	0	0	0	0	0	0	0	0	0	0	0	0
3186	2	1	10.6438	117	39	1	3	3	10	1.328	0.6105	0	25.608	0	0.171	27.7175	0	0	0	0	0	0	0	0	0	0	0	500	0	0	0	0	0	0	0	0	0	0	0	0	0	0	0	0	0	0	0	125	0
3191	2	2	10.8247	117	39	1	3	3	10	0.7135	0.508	0	7.2505	0	0	8.472	0	0	0	0	0	0	0	0	0	0	0	250	0	0	0	0	0	0	0	0	0	0	0	0	0	0	0	0	0	0	0	250	0
3301	2	2	6.66575	117	39	1	3	2	6	0.7346	0.1469	0	22.5061	0.0056	0	23.3932	0	0	0	0	0	0	0	0	0	0	0	500	0	0	0	0	0	0	0	0	0	0	0	0	0	0	0	0	0	0	0	0	0
3303	2	1	8.8	117	39	1	3	2	8	0.337	0	0	13.175	41.485	0	54.997	0	0	0	0	0	0	0	0	0	0	0	250	0	0	0	0	0	0	0	0	0	0	0	0	0	0	0	0	0	0	0	125	0
4028	2	1	10.3562	420	39	3	3	3	10	11.5965	0.57	0	32.7465	0.6975	0	45.6105	0	0	0	0	0	0	0	0	0	0	0	200	0	0	0	0	0	0	0	0	0	0	0	0	0	0	0	0	0	0	0	0	0
4039	2	2	6.03562	420	39	3	3	2	6	36.6025	0.645	0.084	7.688	1.35	0	46.3695	0	0	0	0	0	0	0	0	0	0	0	400	0	0	0	0	0	0	0	0	0	0	0	0	0	0	0	0	0	0	0	0	0
4048	2	2	7.10685	432	39	1	3	2	7	0.674	0	0	26.35	0	0	27.024	0	0	0	0	0	0	0	0	0	0	0	400	0	0	0	0	0	0	0	0	0	0	0	0	0	0	0	0	0	0	0	125	0
4050	2	1	11.5945	420	39	3	3	3	11	13.462	0.76	0	29.996	0.93	0.171	45.319	0	0	0	0	0	0	0	0	0	400	0	0	0	0	0	0	0	0	0	0	0	0	0	0	0	0	0	0	0	0	0	0	0
5004	2	2	7.41644	83	48	4	3	2	7	0.674	0	0	23.467	0	0	24.141	0	20	0	0	0	0	0	0	0	0	0	500	0	0	0	0	0	0	0	0	0	0	0	0	36	15	0	0	0	0	0	0	0
5011	2	1	9.10137	83	48	4	3	2	9	6.595	0.855	0	23.315	0	0	30.765	0	0	0	0	0	0	0	0	0	0	0	200	0	0	0	0	0	0	120	0	0	0	0	0	0	0	0	0	0	0	0	0	0
5013	2	1	9.26027	83	48	4	3	2	9	2.3255	0.2045	0	23.3275	0	0	25.8575	0	0	0	140	0	0	0	0	0	0	0	500	0	0	0	0	0	0	0	0	0	0	0	0	0	0	0	0	15	0	0	0	0
5102	2	1	11.9014	83	48	4	3	3	11	4.05315	0.0225	0	23.1298	0.17205	0	27.3774	0	0	0	0	0	0	0	0	0	0	0	400	0	0	0	0	0	0	0	0	0	0	0	0	0	0	0	0	0	0	0	0	0
5212	2	1	11.3288	517	20	1	3	3	11	11.8745	0	0	19.959	0.9435	0	32.777	0	0	0	0	0	0	0	0	0	0	700	0	0	0	0	0	0	0	0	0	0	0	0	0	0	0	0	0	0	0	0	125	0
5220	2	1	11.1178	510	20	3	3	3	11	1.5555	0	0	32.767	0	0	34.3225	0	0	0	0	0	0	0	0	0	0	0	300	0	0	0	0	0	0	0	0	0	0	0	0	0	0	0	0	0	0	0	125	0
5221	2	2	11.2767	510	20	3	3	3	11	0	0.03	0	0	0	0	0.03	0	0	0	0	0	0	0	0	0	0	0	500	0	0	0	0	0	0	0	0	0	0	0	0	0	0	0	0	0	0	0	0	0
5302	2	2	8.60548	510	20	3	3	2	8	0	0.015	0	11.935	82.97	0	94.92	0	0	0	0	0	0	0	0	0	0	0	200	0	0	0	0	0	0	0	0	0	0	0	0	0	0	0	0	0	0	0	0	0
5313	2	2	8.49863	510	20	3	3	2	8	2.01909	0.0625	0.056	29.8592	0	0	31.9968	0	0	0	0	0	0	0	0	0	150	0	0	0	0	0	0	0	0	0	0	0	0	0	0	0	0	0	0	0	0	0	0	0
5370	2	1	11.0137	510	20	3	3	3	11	2.376	0.0225	0	31.7702	0.1722	0	34.3409	0	0	0	0	0	0	0	0	0	0	0	150	0	0	0	0	0	0	0	0	0	0	0	0	0	0	0	0	0	0	0	250	0
5513	2	1	6.27397	75	1	3	3	2	6	4.1019	0.5489	0	13.9111	0.028	0	18.5899	0	0	0	0	0	50	0	0	0	0	0	525	0	0	0	0	0	0	0	0	0	0	0	0	0	0	0	0	0	0	0	0	0
6006	2	2	8.95616	5	9	1	1	2	8	11.0397	0	0	24.4247	0.58125	0	36.0457	0	0	0	0	0	0	0	0	0	0	0	500	0	0	0	0	0	0	0	0	0	0	0	0	0	0	0	0	15	0	0	0	0
6034	2	2	6.52055	100	48	1	3	2	6	1.996	0.8125	0	27.4108	0	0	30.2193	0	0	0	0	0	0	0	0	0	0	0	450	0	0	0	0	0	0	120	0	0	0	0	0	0	0	0	0	0	0	0	0	0
11063	2	2	11.6904	69	47	3	1	3	11	0.729133	0.06	19.464	17.8405	0	0	38.0936	0	0	0	0	0	0	0	0	0	0	225	0	0	0	0	0	0	0	0	0	0	0	0	0	50	0	0	0	0	0	0	0	0
11118	2	1	6.44384	69	47	3	1	2	6	3.524	0	0	18.662	0	0	22.186	0	0	0	0	0	0	0	0	0	0	0	500	0	0	0	0	0	0	60	0	0	0	0	0	0	0	0	0	0	0	0	0	0
13011	2	1	9.15616	101	2	1	1	2	9	8.36742	0.153	0.014	20.363	0.6045	0	29.5019	0	0	0	0	0	0	0	0	0	0	0	400	0	0	0	0	0	0	60	0	0	0	0	0	0	0	0	0	0	0	0	0	0
13043	2	2	11.7205	101	2	1	1	3	11	20.1373	0.516	2.392	3.7324	0	0	26.7777	0	0	0	0	0	0	0	0	0	0	400	0	0	0	0	0	0	0	60	0	0	0	0	0	0	0	0	0	0	0	0	0	0
13221	2	2	10.9973	101	2	1	1	3	11	1.54	0.306	0	8.1	0	0	9.946	0	0	0	0	0	0	0	0	0	0	0	400	0	0	0	0	0	0	0	0	0	0	0	0	0	0	0	0	0	0	0	0	0
14016	2	1	8.79726	67	13	3	1	2	8	3.38438	0	0.112	30.473	0	0	33.9694	0	0	0	0	0	0	0	0	0	0	0	400	0	0	0	0	0	0	0	0	0	0	0	0	0	0	0	0	0	0	0	125	0
14018	2	2	9.04658	134	13	2	1	2	9	2.136	0	0	37.603	0	0	39.739	0	0	0	0	0	0	0	0	0	0	0	500	0	0	0	0	0	0	0	0	0	0	0	0	50	0	0	0	0	0	0	0	0
14021	2	2	9.89041	67	13	3	1	2	9	1.4295	0.015	0	18.8565	0	0	20.301	0	0	0	0	0	0	0	0	0	0	0	500	0	0	0	0	0	0	0	0	0	0	0	0	0	0	0	0	0	0	0	0	0
14022	2	2	11.211	205	13	1	1	3	11	2.174	0	0	18.662	0	0	20.836	0	0	0	0	0	0	0	0	0	0	0	200	0	0	0	0	0	0	0	0	0	0	0	0	0	0	0	0	0	0	0	125	0
14067	2	1	7.74521	211	13	1	1	2	7	2.7165	0	0	41.9895	0	0	44.706	0	0	0	0	0	0	0	0	0	0	0	675	0	0	0	0	0	0	0	0	0	0	0	0	0	0	0	0	0	0	0	125	0
14074	2	1	6.27945	206	13	1	1	2	6	3.076	0.7695	0	27.993	0	0	31.8385	0	0	0	150	0	0	0	0	0	0	0	600	0	0	0	0	0	0	0	0	0	0	0	0	0	0	0	0	0	0	0	0	0
15011	2	2	6.17534	216	13	1	1	2	6	1.424	17.34	0	19.753	0	0	38.517	0	0	0	0	0	0	0	0	0	200	0	0	0	0	0	0	0	0	0	0	0	0	0	0	0	0	0	0	0	0	0	0	0
15075	2	1	10.011	137	13	2	1	3	10	1.348	0	0	37.324	0	0	38.672	0	0	0	110	0	0	0	0	0	0	0	650	0	0	0	0	0	0	0	0	0	0	0	0	0	0	0	0	0	0	0	0	0
15094	2	1	10.7863	206	13	1	1	3	10	10.5657	2.053	0	31.6361	0.6045	0	44.8593	0	0	0	0	0	0	0	0	0	0	125	0	0	0	0	0	0	0	0	0	0	0	0	0	0	0	0	0	0	0	0	0	0
17033	2	2	10.6219	54	13	2	1	3	10	0.08	0.015	45.4865	0	0	0	45.5815	0	0	0	0	0	0	0	0	0	0	0	0	0	0	0	0	0	0	0	0	0	0	0	0	0	0	0	0	0	0	0	0	0
17034	2	2	6.7863	54	13	2	1	2	6	0.4044	0	0	11.1972	0	0	11.6016	0	0	0	0	70	0	0	0	0	0	0	400	0	0	0	0	0	0	0	0	0	0	0	0	0	0	0	0	0	0	0	0	0
17038	2	2	6.64932	54	13	2	1	2	6	0.6045	0.392	9.6305	12.5745	0	0	23.2015	200	0	0	0	0	0	0	0	0	0	0	200	0	0	0	0	0	0	0	0	0	0	0	0	0	0	0	0	0	0	0	125	0
17082	2	2	10.1945	54	13	2	1	3	10	1.1544	0.0075	22.763	11.1972	0	0	35.1221	0	0	0	0	0	0	0	0	0	0	0	200	0	0	0	0	0	0	0	0	0	0	0	0	0	0	0	0	0	0	0	0	0
21001	2	2	6.04658	81	41	4	4	2	6	1.6685	0	0	25.0015	0	0	26.67	0	0	0	0	0	0	0	0	0	0	0	200	0	0	0	0	0	0	0	0	0	0	0	0	0	0	0	0	0	0	0	0	0
21067	2	1	11.0795	81	41	4	4	3	11	1.5	0	28.016	0	0	0	29.516	0	0	0	0	0	0	0	0	0	0	0	200	0	0	0	0	0	0	0	0	0	0	0	0	0	0	0	0	0	0	0	0	0
21082	2	2	6.9589	410	41	2	4	2	6	2.25	0.03	0	1.395	0	0	3.675	0	0	0	0	0	0	0	0	0	0	0	200	0	0	0	0	125	0	0	0	0	0	0	0	0	0	0	0	0	0	0	0	0
22006	2	1	8.63288	72	23	3	4	2	8	8.65275	0.511	0	33.7567	0.62125	0	43.5418	0	0	0	0	0	0	0	0	0	0	0	500	0	0	0	0	0	0	0	0	0	0	0	0	0	0	0	0	20	0	0	0	0
22029	2	1	7.91507	72	23	3	4	2	7	5.009	0	0	20.356	0	0	25.365	0	0	0	0	0	0	0	0	0	0	0	250	0	0	0	0	0	0	0	0	0	0	0	40	0	0	0	0	0	0	0	0	0
22036	2	2	11.5205	72	23	3	4	3	11	1.574	0	0	18.662	0	0	20.236	0	0	0	0	0	0	0	0	0	0	0	700	0	0	0	0	0	0	0	0	0	0	0	0	0	0	0	0	0	0	0	0	0
22048	2	2	6.51781	72	23	3	4	2	6	7.5945	0.015	0	20.5995	0	0	28.209	0	0	0	0	0	0	0	0	0	0	0	550	0	0	0	0	0	0	0	0	0	0	0	0	0	0	0	0	30	0	0	0	0
22052	2	1	10.0959	72	23	3	4	3	10	42.838	0	0	4.01	0	0.4	47.248	0	0	0	0	0	0	0	0	0	0	0	250	0	0	0	0	0	0	0	0	0	0	0	0	0	0	0	0	0	0	0	0	0
22069	2	2	11.9589	104	4	1	4	3	11	1.71	0.38	0	20.73	0	0	22.82	0	0	0	0	0	0	0	0	0	0	0	250	0	0	0	0	0	0	0	0	0	0	0	0	0	0	0	0	0	0	0	0	0
22089	2	2	7.87671	104	4	1	4	2	7	5.8785	0	0	40.6755	0.372	0	46.926	0	0	0	0	0	0	0	0	0	0	0	250	0	0	0	0	0	0	0	0	0	0	0	0	0	0	0	0	0	0	0	0	0
24011	2	1	7.40274	60	23	2	4	2	7	0.6935	0	0	6.3755	0	0	7.069	200	0	0	0	0	0	0	0	0	0	0	700	0	0	0	0	0	0	0	0	0	0	0	0	50	0	0	0	20	0	0	0	0
25020	2	1	8.48219	120	41	2	4	2	8	1.5	0	0	0	0	0	1.5	0	0	0	0	0	0	0	0	0	0	0	0	0	0	0	0	0	0	0	0	0	0	0	0	10	0	0	0	0	0	0	0	0
25042	2	2	9.03562	120	41	2	4	2	9	1.1795	0	0	42.2685	0	0	43.448	0	0	0	0	0	0	0	0	0	0	0	750	0	0	0	0	0	0	0	0	0	0	0	0	0	0	0	0	0	0	0	0	0
25070	2	1	6.05753	120	41	2	4	2	6	1.011	0	0	27.993	0	0	29.004	0	0	0	0	0	0	0	0	0	0	0	400	0	0	0	0	0	0	0	0	0	0	0	0	0	0	0	0	0	0	0	0	0
26017	2	1	6.75342	55	7	2	2	2	6	4.231	0.03	0	33.759	0	0	38.02	125	0	0	0	0	0	0	0	0	0	0	400	0	0	0	0	0	0	0	0	0	0	0	0	0	0	0	0	0	0	0	0	0
26030	2	2	11.6932	29	7	1	2	3	11	1.507	0.514	0	27.9934	0.016	0	30.0304	0	0	0	60	0	0	0	0	0	0	0	200	0	0	0	0	0	0	0	0	0	0	0	0	0	0	0	0	0	0	0	0	0
27005	2	2	11.5973	56	8	2	2	3	11	11.7142	0.466	0	16.3012	0.62775	0	29.1092	0	0	0	0	0	0	0	0	0	0	0	250	0	0	0	0	0	0	0	0	0	0	0	30	0	0	0	0	0	0	0	0	0
29016	2	1	8.62466	58	8	2	2	2	8	11.3147	0.19	0.056	36.309	0	0	47.8697	0	0	0	0	0	0	0	0	0	0	0	225	0	0	0	0	0	0	0	0	125	0	0	0	0	0	0	0	0	0	0	0	0
30097	2	2	6.99452	25	43	1	2	2	7	0.337	0	0	40.083	0	0	40.42	0	0	0	0	0	0	0	0	0	0	0	400	0	0	0	0	0	0	0	0	0	0	0	0	0	0	0	0	0	0	0	0	0
33015	2	1	11.7315	79	8	4	2	3	11	12.5933	0.0075	0.028	10.2635	0	0	22.8923	0	0	0	0	0	0	0	0	0	0	0	400	0	0	0	0	0	0	0	0	0	0	0	0	0	0	0	0	0	0	0	0	0
33045	2	1	10.3014	79	8	4	2	3	10	20.264	0	0	16.64	0	0	36.904	0	0	0	0	0	0	0	0	0	0	0	0	0	0	0	0	0	0	0	0	0	0	0	0	0	0	0	0	0	0	0	0	0
33054	2	1	8.09315	79	8	4	2	2	8	15.2775	0	0	15.1145	0	0	30.392	0	0	0	0	0	0	0	0	0	0	0	200	0	0	0	0	0	0	0	0	0	0	0	0	0	0	0	0	20	0	0	0	0
33059	2	1	6.46849	79	8	4	2	2	6	8.13038	1.3605	0.112	12.529	0	0	22.1319	0	0	0	0	0	0	0	0	0	0	0	200	0	0	0	0	0	0	0	0	0	0	0	0	0	60	0	0	0	0	0	125	0
33173	2	2	8.8	79	8	4	2	2	8	17.3805	0.0075	0	20.0465	0	0	37.4345	0	0	0	0	0	0	0	0	0	0	0	500	0	0	0	0	0	0	0	0	0	0	0	0	30	0	0	0	0	0	0	0	0
36001	2	1	7.78904	84	46	4	5	2	7	3.5845	0.0385	0	17.8405	0	0	21.4635	0	0	0	0	0	90	0	0	0	0	0	200	0	0	0	0	0	0	60	0	0	0	0	0	0	0	0	0	0	0	0	0	0
36006	2	1	7.01644	84	46	4	5	2	7	12.7925	0.2385	0	24.1503	0.942	0	38.1233	0	0	0	0	300	0	0	0	0	0	0	400	0	0	0	0	0	0	0	0	0	0	60	0	0	0	0	0	0	0	0	125	0
36010	2	2	8.47397	84	46	4	5	2	8	1.2135	0.2385	0	35.6813	0.012	0	37.1453	200	0	0	200	0	115	0	0	0	0	0	400	0	0	0	0	0	0	0	0	0	0	0	0	0	0	0	0	0	0	0	0	0
36013	2	1	10.9425	84	46	4	5	3	10	0.674	0.084	0	29.7745	0	0	30.5325	0	0	0	140	0	0	0	0	0	0	0	300	0	0	0	0	0	0	0	0	0	0	0	0	0	0	0	0	0	0	0	0	0
37026	2	2	7.41918	121	3	2	5	2	7	0	0	14.8835	0	0	0	14.8835	200	0	0	0	0	0	0	0	0	0	0	0	0	0	0	0	0	0	0	0	0	0	0	0	0	0	0	0	40	0	0	0	0
38057	2	1	8.38356	107	12	2	5	2	8	0.8088	0.0075	0	22.3944	0	0	23.2107	0	0	0	0	0	0	0	0	0	0	0	400	0	0	0	0	0	0	0	0	0	0	0	0	0	0	0	0	0	0	0	0	0
38181	2	2	9.15342	115	17	1	2	2	9	3.3825	0	0	0.363	0	0	3.7455	0	0	0	110	0	100	0	0	0	0	0	0	0	0	0	0	0	0	0	0	0	0	0	0	0	0	0	0	0	0	0	0	0
39063	2	2	11.6219	85	35	4	6	3	11	3.959	0	0	37.324	0	0	41.283	0	0	0	0	0	0	0	0	0	0	0	400	0	0	0	0	0	0	0	0	0	0	0	0	0	0	0	0	0	0	0	0	0
41003	2	2	8.84932	81	41	4	4	2	8	17.823	0.306	0	16.2922	0	0.175	34.5962	0	0	0	0	0	0	0	0	0	0	450	0	0	0	0	0	0	0	0	0	0	0	0	0	0	0	0	0	0	0	0	125	0
85042	2	2	6.86849	119	29	3	4	2	6	2.8147	0.046	0	20.7921	0.1395	0	23.7923	0	0	0	0	0	0	0	0	0	0	0	500	0	0	0	0	0	0	0	0	0	0	0	0	25	0	0	0	0	0	0	0	0
88048	2	1	9.9863	84	46	4	5	2	9	0.4044	0	17.51	13.8322	0	0	31.7466	0	0	0	0	0	0	0	0	0	0	0	400	0	0	0	0	0	0	0	0	0	0	0	0	0	0	0	0	0	0	0	0	0
88058	2	1	9.52329	84	46	4	5	2	9	3.3254	0	0	15.8872	4.779	0	23.9916	0	0	0	0	0	0	0	0	0	400	0	0	0	0	0	0	0	0	0	0	0	0	0	0	0	0	0	0	0	0	0	0	0
89023	2	1	8.48493	82	29	4	4	2	8	2.511	0.0075	0	39.525	0	0	42.0435	0	0	0	0	0	75	0	0	0	0	0	400	0	0	0	0	0	0	0	0	0	0	0	0	0	0	0	0	0	0	0	0	0
2023	2	2	6.91233	62	33	2	3	2	6	3.299	0	0	29.822	0	0	33.121	0	0	0	0	0	0	0	0	0	200	0	200	0	0	0	0	0	0	0	0	0	0	0	0	0	0	0	0	0	0	0	125	0
2025	2	2	7.67671	62	33	2	3	2	7	8.835	0	0	22.661	0.372	0	31.868	0	0	0	0	0	0	0	0	0	0	0	250	0	0	0	0	0	0	0	0	0	0	0	0	0	0	0	0	0	0	0	125	0
2039	2	2	10.4493	62	33	2	3	3	10	6.07823	0.03	0.14	18.662	0	0	24.9102	0	0	0	0	0	0	0	0	0	0	0	300	0	0	0	0	0	0	0	0	0	0	0	0	0	0	0	0	0	0	0	0	0
3047	2	2	7.49863	44	39	1	3	2	7	11.9184	0.2525	0.056	19.9395	0.6735	0	32.8399	0	0	0	0	0	0	0	0	0	0	400	0	0	0	0	0	0	0	0	0	0	0	0	0	0	0	0	0	0	0	0	0	250
3086	2	1	10.8603	73	39	3	3	3	10	4.104	0.69	0	7.907	0	0	12.701	0	0	0	0	0	0	0	0	0	0	0	250	0	0	0	0	0	0	0	0	0	0	0	0	0	0	0	0	0	0	0	0	0
3308	2	2	10.3397	117	39	1	3	3	10	16.1245	0	0	9.331	0.675	0	26.1305	0	0	0	0	0	0	0	0	0	0	0	550	0	0	0	0	0	0	0	0	30	0	0	0	0	0	0	0	0	0	0	0	0
4051	2	2	8.61096	420	39	3	3	2	8	7.795	0.03	0	12.075	0.465	0	20.365	0	0	0	0	0	0	0	0	0	0	0	400	0	0	0	0	0	0	0	0	0	0	0	0	0	0	0	0	0	0	0	0	0
5213	2	1	10.1452	510	20	3	3	3	10	3.4525	0.0225	0	27.612	0	0	31.087	0	0	0	0	0	0	0	0	0	0	0	300	0	0	0	0	0	0	0	0	0	0	0	0	0	0	0	0	0	0	0	0	0
5216	2	1	9.84932	514	20	3	3	2	9	2.437	0	0	24.707	0	0	27.144	125	0	0	0	0	120	0	0	0	0	0	200	0	0	0	0	0	0	0	0	0	0	0	0	0	0	0	0	0	0	0	0	0
5304	2	2	10.989	510	20	3	3	3	10	2.8606	0.8	0	33.5028	0	0	37.1634	0	0	0	0	0	0	0	0	0	0	0	200	0	0	0	0	0	0	0	0	0	0	0	0	0	0	0	0	0	0	0	0	0
6012	2	2	6.07397	5	9	1	1	2	6	1.7955	0.1485	10.506	21.7372	0	0	34.1872	0	0	0	0	0	0	0	0	0	0	0	350	0	0	0	0	0	0	0	0	0	0	0	0	0	0	0	0	0	0	0	0	0
8005	2	2	9.88493	78	28	4	1	2	9	12.787	0.045	0	15.6435	0	0	28.4755	0	0	0	0	0	0	0	0	0	0	0	400	0	0	0	0	0	0	0	0	0	0	0	0	0	0	0	0	0	0	0	0	0
11055	2	2	9.66027	69	47	3	1	2	9	10.6985	1.6375	0.098	26.9945	0	0	39.4285	0	0	0	0	0	0	0	0	0	0	0	400	0	0	0	0	0	0	0	0	0	0	0	0	0	0	0	0	0	0	90	0	0
11074	2	2	6.25753	69	47	3	1	2	6	5.36269	0.306	0.056	4.3245	82.97	0	93.0192	0	0	0	0	0	0	0	0	0	0	0	300	0	0	0	0	0	25	0	0	0	0	0	0	0	0	0	0	0	0	0	250	0
11082	2	1	9.60548	69	47	3	1	2	9	1.446	0	0	17.428	1.466	0	20.34	0	0	0	0	0	0	0	0	0	0	0	225	0	0	0	0	0	0	60	0	0	0	0	0	0	0	0	0	0	0	0	0	0
11108	2	1	10.4904	69	47	3	1	3	10	9.8235	1.182	0	26.3585	0	0	37.364	0	0	0	0	0	0	0	0	0	600	0	0	0	0	0	0	0	0	0	0	0	0	0	0	0	0	0	0	0	0	0	0	0
11110	2	1	10.4027	69	47	3	1	3	10	20.8163	0.2145	0.042	9.331	0.9	0	31.3038	0	0	0	0	0	120	0	0	0	0	0	300	0	0	0	0	0	0	0	0	0	0	0	0	0	0	0	0	0	0	0	0	0
13014	2	1	11.7068	46	46	1	5	3	11	12.8605	1.468	0	22.826	0.759	0	37.9135	0	0	0	0	0	0	0	0	0	0	0	0	0	0	0	0	0	0	0	0	0	0	0	0	0	0	10	0	0	0	0	0	0
13214	2	2	7.05205	101	2	1	1	2	7	0.5775	0	15.759	4.9595	0	0	21.296	0	0	0	0	0	0	0	0	0	250	0	0	0	0	0	0	0	0	0	0	0	0	0	0	0	0	0	0	0	0	0	0	0
14014	2	2	9.12055	67	13	3	1	2	9	10.2155	0.41	0	31.9915	0.6975	0	43.3145	0	0	0	0	0	0	0	0	0	200	0	0	0	0	0	0	0	0	0	0	0	0	0	0	50	0	0	0	0	0	0	0	125
14072	2	1	7.9589	135	13	2	1	2	7	2.0135	0.1155	0.136	24.2215	0.492	0	26.9785	0	0	0	0	0	0	0	0	0	0	0	475	0	0	0	0	0	0	0	0	0	0	0	0	0	0	0	0	0	0	0	0	0
15013	2	2	6.22466	67	13	3	1	2	6	3.1685	0	26.265	6.0605	0	0	35.494	0	0	0	0	0	0	0	0	0	0	0	750	0	0	0	0	0	0	0	0	0	0	0	0	0	0	0	0	0	0	0	125	0
17004	2	1	6.94521	78	28	4	1	2	6	8.9316	0.0075	0	20.4258	0	0	29.3649	0	0	0	0	0	0	0	0	0	0	0	500	0	0	0	0	0	0	60	0	0	0	0	0	0	0	0	0	20	0	0	0	0
17011	2	1	11.5178	54	13	2	1	3	11	0.5392	0.012	9.6305	22.6176	0	0	32.7993	0	0	0	0	0	0	0	0	0	0	0	250	0	250	0	0	0	0	0	0	0	0	0	0	0	0	0	0	0	0	0	0	0
17013	2	1	8.05753	54	13	2	1	2	8	2.524	0.0715	22.41	3.5932	0.008	0	28.6067	100	0	0	0	0	0	0	0	0	0	0	475	0	0	0	0	0	0	0	0	0	0	0	0	0	0	100	0	0	0	0	0	0
17060	2	1	9.41918	54	13	2	1	2	9	2.5533	0.1755	19.261	16.0859	0	0	38.0757	0	0	0	0	0	0	0	0	0	0	0	300	0	0	0	0	0	0	0	0	0	0	0	0	0	0	0	0	0	0	0	0	0
17077	2	2	11.0082	54	13	2	1	3	11	1.30503	0.8325	19.401	15.1249	0	0	36.6634	0	0	0	0	0	0	0	0	0	0	0	200	0	0	0	0	0	0	0	0	0	0	0	0	0	0	0	0	0	0	0	125	0
20010	2	2	11.126	119	29	3	4	3	11	7.20063	0.2844	0.0575	0.349	0.002	2.81	10.7035	0	0	0	0	0	0	0	0	0	0	0	250	0	0	0	0	0	0	0	0	0	0	0	0	0	0	0	0	0	0	0	0	0
21029	2	1	7.16164	81	41	4	4	2	7	13.3018	1.44	0	28.7218	0.62775	0	44.0913	200	0	0	0	0	0	0	0	0	0	0	200	0	0	0	0	0	0	0	0	0	0	0	0	0	0	0	0	0	0	0	0	0
21052	2	1	10.863	81	41	4	4	3	10	1.5	0	28.016	0	0	0	29.516	0	0	0	0	0	0	0	0	0	0	0	200	0	0	0	0	0	0	0	0	0	0	0	0	60	0	0	0	0	0	0	0	0
21057	2	1	10.1425	81	41	4	4	3	10	12.1252	0	0	32.6583	0.86025	0	45.6437	0	0	0	0	0	0	0	0	0	0	400	0	0	0	0	0	0	0	0	0	0	0	60	0	0	0	0	0	0	0	0	0	0
22016	2	1	7.19726	72	23	3	4	2	7	1.362	0	0	2.43	0	0	3.792	0	0	0	0	0	0	0	0	0	0	0	550	0	0	0	0	0	0	0	0	0	0	40	0	0	0	0	0	0	0	0	0	0
24013	2	1	9.03562	60	23	2	4	2	9	16.2077	0.306	0	21.1062	0.62775	0	38.2477	0	0	0	0	0	0	0	0	0	0	0	200	0	0	0	0	0	0	0	0	0	0	0	0	40	0	0	0	0	0	0	250	0
24017	2	1	8.23562	60	23	2	4	2	8	5.56587	0.686	0.105	17.2735	0	0	23.6304	0	0	0	0	0	0	0	0	0	0	0	400	0	0	0	0	0	0	0	0	0	0	0	0	0	0	0	0	0	0	0	0	0
24042	2	1	10.5644	60	23	2	4	3	10	19.2185	0.153	0	10.4625	0.9	0	30.734	0	0	0	0	0	0	0	0	0	0	0	230	0	0	0	0	0	0	0	0	0	0	0	0	0	0	0	0	0	0	0	0	0
25006	2	2	8.46575	120	41	2	4	2	8	2.458	0.5975	28.016	2.365	0	0	33.4365	0	0	0	0	0	0	0	0	0	0	0	350	0	0	0	0	0	0	0	0	0	0	0	0	0	0	0	0	0	0	0	0	0
27044	2	1	9.62466	56	8	2	2	2	9	0.674	0.03	0	23.095	0	0	23.799	0	0	0	0	0	0	0	0	0	0	0	150	0	0	0	0	0	0	0	0	0	0	0	0	30	0	0	0	0	0	0	0	0
27050	2	1	6.04658	56	8	2	2	2	6	8.3467	0.2754	0.125	16.2621	0	0	25.0092	0	0	0	0	0	0	0	0	0	400	0	0	0	0	0	0	0	0	0	0	0	0	0	0	0	0	0	0	18	0	0	0	0
27056	2	2	7.22466	56	8	2	2	2	7	18.275	0.485275	0	8.435	0	0	27.1953	0	0	0	0	0	0	0	0	0	0	0	425	0	0	0	0	0	0	0	0	0	0	0	10	20	0	0	0	0	0	0	0	0
28002	2	1	9.72055	57	8	2	2	2	9	16.7125	0.06	0.182	21.406	0.465	0	38.8255	0	0	0	0	0	0	0	0	0	250	0	0	0	0	0	0	0	0	0	0	0	0	0	0	0	0	0	0	0	0	0	0	0
28049	2	2	10.326	71	8	3	2	3	10	0.929269	0.2615	0.042	0.187	0.123	0	1.54277	0	0	0	0	0	0	0	0	0	0	0	200	0	0	0	0	0	0	0	0	0	0	0	0	0	0	0	0	0	0	0	125	0
28077	2	1	7.47397	71	8	3	2	2	7	8.38186	0.455	0.07	24.8498	0.58125	0	34.3379	0	0	0	0	100	0	0	0	0	0	0	250	0	0	0	0	0	15	0	0	0	0	0	0	0	0	0	0	0	0	0	0	0
30047	2	1	11.9288	23	43	1	2	3	11	1.011	0.612	0	29.543	0	0	31.166	0	0	0	0	0	0	0	0	0	0	0	600	0	0	0	0	0	0	0	0	0	0	0	0	20	0	0	0	0	0	0	0	0
30067	2	1	9.47945	24	43	1	2	2	9	4.91765	0.852	0.154	18.662	0	0	24.5857	0	0	0	0	0	0	0	0	0	0	0	550	0	0	0	0	0	0	0	0	0	0	0	0	0	0	0	0	0	0	0	0	0
31022	2	1	9.07397	86	8	2	2	2	9	9.473	0.038	0	26.3155	0.6045	0	36.431	0	0	0	0	0	0	0	0	0	700	0	0	0	0	0	0	0	0	0	0	0	0	0	0	70	0	0	0	0	0	0	0	0
33025	2	2	7.63836	79	8	4	2	2	7	0	0	0	1.4725	0	0	1.4725	0	0	0	0	0	0	0	0	0	0	0	600	0	0	0	0	0	0	0	0	0	0	0	0	40	0	0	0	0	0	0	0	0
33050	2	2	11.474	79	8	4	2	3	11	9.29923	0.315	15.0235	2.447	0	0	27.0847	0	0	0	0	0	0	0	0	0	0	0	200	0	0	0	0	0	0	0	0	0	0	0	0	40	0	0	0	40	0	0	0	0
33068	2	1	8.11507	79	8	4	2	2	8	14.5475	0.2075	0.14	19.1842	0.62775	0	34.707	0	0	0	0	0	0	0	0	0	0	0	400	0	0	0	0	0	0	0	60	0	0	0	0	0	0	0	0	0	0	0	0	0
33081	2	2	6.42192	79	8	4	2	2	6	0.45	0.0075	0	1.4725	0	0	1.93	200	0	0	0	0	0	0	0	0	0	0	150	0	0	0	0	0	0	0	0	0	0	0	0	0	0	0	0	0	0	0	0	0
33100	2	2	11.1945	79	8	4	2	3	11	4.74423	0.5825	0.14	27.993	0	0	33.4597	0	0	0	0	0	0	0	0	0	0	0	500	0	0	0	0	0	0	0	0	0	0	0	0	0	0	0	0	0	0	0	125	0
33101	2	2	8.38356	79	8	4	2	2	8	15.9925	0.9285	0.07	5.9275	0	0	22.9185	0	0	0	0	0	55	0	0	0	0	0	210	0	0	0	0	0	0	60	0	0	0	0	0	0	0	0	0	0	0	0	0	0
33119	2	2	8.16712	79	8	4	2	2	8	20.0731	0.8945	0.168	13.513	0	0	34.6486	0	0	0	0	0	0	0	0	0	0	0	500	0	0	0	0	0	0	0	0	0	0	0	0	0	0	0	0	0	0	0	0	0
33175	2	1	8.49041	79	8	4	2	2	8	3.979	0	0	0	0	0	3.979	0	0	0	0	0	0	0	0	0	0	0	230	0	0	0	0	0	0	0	0	0	0	0	0	20	0	0	0	0	0	0	125	0
34066	2	1	5.99452	80	50	4	2	1	6	4.97062	2.9955	0.014	17.215	0	0	25.1951	0	0	0	0	0	0	0	0	0	0	0	400	0	0	0	0	0	0	60	0	0	0	0	0	0	0	0	0	0	0	0	0	0
34081	2	1	7	80	50	4	2	2	7	11.6497	3.345	0.14	31.8255	0	0	46.9602	0	0	0	0	0	0	0	0	0	0	0	500	0	0	0	0	0	0	0	0	0	0	0	0	0	0	0	0	0	0	0	0	0
34086	2	2	8.65753	80	50	4	2	2	8	4.74267	0.43	14.113	9.331	0	0	28.6167	0	0	0	0	0	0	0	0	0	0	0	500	0	0	0	0	0	0	0	0	0	0	0	0	0	0	0	0	0	0	0	125	0
38048	2	1	7.14247	64	12	2	5	2	7	7.83012	14.625	0.07	14.6885	0.372	0	37.5856	0	0	0	0	0	0	0	0	0	0	0	400	0	0	0	0	0	0	0	0	0	0	0	0	0	0	0	0	0	0	0	0	0
38050	2	2	11.1918	64	12	2	5	3	11	9.7795	0.015	0	27.4435	0.6975	0	37.9355	0	0	0	0	0	0	0	0	0	0	0	200	0	0	0	0	0	0	0	0	0	0	0	0	0	0	0	0	0	0	0	0	0
38169	2	1	6.27123	114	17	3	2	2	6	1.125	0	0	0.2	0	0	1.325	200	0	0	0	0	150	0	0	0	0	0	0	0	0	0	0	0	0	0	0	0	0	0	0	0	0	0	0	0	0	0	0	0
38186	2	2	10.0164	530	17	1	2	3	10	4.59058	0.0375	14.176	15.7665	0	0	34.5706	0	0	0	0	0	0	0	0	0	0	0	200	0	0	0	0	0	0	0	0	0	0	0	0	0	0	0	0	0	0	0	0	0
39004	2	1	7.70685	85	35	4	6	2	7	18.5685	0.993	0	16.3085	0	0.15	36.02	0	0	0	0	0	0	0	0	0	0	0	500	0	0	0	0	0	0	0	0	0	0	0	0	0	0	0	0	0	0	0	0	0
39037	2	2	11.8301	85	35	4	6	3	11	0.339306	0	0.308	5.766	0	0	6.41331	0	0	0	0	0	0	0	0	0	0	400	0	0	0	0	0	0	0	0	0	0	0	0	0	0	0	0	0	0	0	0	0	0
40006	2	1	10.5836	77	38	3	6	3	10	1.56169	0	0.056	0	0	0	1.61769	0	0	0	0	0	0	0	0	0	0	0	300	0	0	0	0	0	0	0	0	0	0	0	0	0	0	0	0	0	0	0	0	0
40017	2	2	10.6548	77	38	3	6	3	10	0.4044	0	0	11.1972	0	0	11.6016	0	0	0	0	0	0	0	0	0	0	0	300	0	0	0	0	0	0	90	0	0	0	0	0	0	0	0	0	0	0	0	0	0
72004	2	1	11.2082	116	8	3	2	3	11	11.4515	0	0	23.55	0.7905	0	35.792	0	0	0	0	0	0	0	0	0	0	200	0	0	0	0	0	0	0	0	0	0	0	0	0	0	0	0	0	0	0	0	0	125
87040	2	1	10.2877	230	30	3	5	3	10	4.6685	0.0225	35.02	4.6655	0	0	44.3765	0	0	0	0	0	0	0	0	0	250	0	0	0	0	0	0	0	0	0	0	0	0	0	0	0	0	0	0	0	0	0	0	0
88020	2	1	8.87671	84	46	4	5	2	8	12.1561	0.6535	0.07	0.3017	0.3945	0	13.5758	0	0	0	0	140	0	0	0	0	300	0	200	0	0	0	0	0	0	0	0	0	0	0	0	40	0	0	0	0	0	0	0	0
88045	2	2	9.15616	84	46	4	5	2	9	1.5	0	17.51	9.61	0	0	28.62	0	0	0	0	0	0	0	0	0	0	0	200	0	0	0	0	0	0	0	0	0	0	0	0	0	0	30	0	0	0	0	0	0
88074	2	2	11.6247	129	46	1	5	3	11	0.7272	0.015	33.615	5.5986	0	0	39.9558	0	0	0	0	0	0	0	0	0	0	0	200	0	0	0	0	0	0	0	0	0	0	0	0	0	0	30	0	0	0	0	0	0
88094	2	2	6.15068	84	46	4	5	2	6	2.808	43.4115	0	1.2103	0.012	0	47.4418	0	0	0	0	0	0	0	0	0	0	0	200	0	0	0	0	0	40	0	0	0	0	0	0	0	0	0	0	0	0	0	125	0
4021	3	1	14.5781	424	39	1	3	4	14	14.524	0.03	8.755	20.212	0	0	43.521	0	0	0	0	0	0	0	0	0	0	0	200	0	0	0	0	0	0	0	0	0	0	0	0	0	0	0	0	0	0	0	0	0
30041	3	2	17.2904	25	43	1	2	4	17	4.93961	24.471	0.07	1.7813	0.052	0	31.3139	0	0	0	0	0	0	0	0	0	0	0	600	0	0	0	0	0	0	0	0	0	0	0	0	0	0	0	0	0	0	0	0	0
88017	3	1	14.5452	129	46	1	5	4	14	3.6248	0.5355	0.05	23.1664	0	0.057	27.4337	0	0	0	0	0	0	0	0	0	0	0	200	0	0	0	0	0	0	0	0	0	0	0	0	0	0	0	0	0	0	0	0	0
3057	3	2	13.3342	44	39	1	3	3	13	8.76875	0	0	15.0938	0.58125	0	24.4438	0	0	0	0	0	0	0	0	0	0	0	0	0	0	0	0	0	0	0	0	0	0	0	15	0	0	0	0	0	0	0	0	0
11048	3	1	16.9973	69	47	3	1	4	17	2.5665	0	0	42.1095	0	0	44.676	0	0	0	0	0	0	0	0	0	0	0	1025	0	0	0	0	0	0	0	0	0	0	0	0	0	0	0	0	0	0	0	0	0
14082	3	1	12.2274	67	13	3	1	3	12	1.011	0	0	27.993	0	0	29.004	0	0	0	0	0	0	0	0	0	0	0	750	0	0	0	0	0	0	0	0	0	0	0	0	0	0	0	0	0	0	0	0	0
15025	3	2	16.3397	136	13	1	1	4	16	9.2065	0.459	13.446	4.0825	0.1395	0	27.3335	0	0	0	0	0	0	0	0	0	0	0	300	0	0	0	0	0	0	0	0	0	0	0	0	0	0	0	0	0	0	0	0	0
21041	3	2	17.8247	81	41	4	4	4	17	12.9507	0.42	0	22.3388	0.86025	0	36.5697	0	0	0	0	0	80	0	0	0	0	0	0	0	0	0	0	0	0	0	0	0	0	0	0	0	0	0	0	15	0	0	0	0
22072	3	1	16.3918	104	4	1	4	4	16	1.811	0.093	0	18.662	0	0	20.566	0	0	0	0	0	0	0	0	0	0	0	500	0	0	0	0	0	0	0	0	0	0	0	0	0	0	0	0	0	0	0	0	0
27001	3	1	12.9425	56	8	2	2	3	12	1.2588	0.0375	0	24.2544	0	0	25.5507	0	0	0	125	0	0	0	0	0	0	0	625	0	0	0	0	0	0	0	0	0	0	0	0	0	0	0	0	0	0	0	125	0
27032	3	1	14.3123	56	8	2	2	4	14	0.674	0.0195	0	20.584	0	0	21.2775	225	0	0	0	0	0	0	0	0	0	0	200	0	0	0	0	0	0	0	0	0	0	0	0	0	20	0	0	0	0	0	0	0
27058	3	2	17.6027	56	8	2	2	4	17	1.674	0.612	0	18.742	0	0	21.028	0	0	0	125	0	0	0	0	0	0	0	500	0	0	0	0	0	0	0	0	0	0	0	0	0	0	0	0	40	0	0	0	0
37032	3	2	14.9699	122	3	3	5	4	14	0.1515	0.015	0.025	38.6865	0	0	38.878	0	0	0	0	0	0	0	0	0	0	0	0	0	0	0	0	0	0	0	0	0	0	0	0	0	0	0	0	0	0	0	0	0
38162	3	1	16.1205	114	17	3	2	4	16	1.24085	0.0822	0.028	4.60875	36.505	0	42.4648	0	0	0	0	0	0	0	0	0	0	0	200	0	0	0	0	0	0	0	0	0	0	0	0	0	0	0	0	0	0	0	0	0
39065	3	2	16.611	52	35	1	6	4	16	3.674	0	0	18.662	0	0	22.336	0	0	0	0	0	0	0	0	0	0	0	400	0	0	0	0	0	0	0	0	0	0	0	40	0	0	0	0	0	0	0	0	0
39067	3	2	15.537	52	35	1	6	4	15	8.405	0.6415	0	28.8907	0.028	0	37.9652	0	0	0	0	0	0	0	0	0	0	0	400	0	0	0	0	0	0	0	0	0	0	0	0	60	0	0	0	0	0	0	0	0
87026	3	1	16.3781	218	30	1	5	4	16	2.924	0.612	0	18.662	0	0	22.198	0	0	0	0	0	0	0	0	0	400	0	0	0	0	0	0	0	0	0	0	0	0	0	0	0	0	0	0	40	0	0	0	0
2044	3	2	12.4986	501	33	1	3	3	12	6.899	0.7675	0	17.311	0	0	24.9775	0	0	0	0	0	0	0	0	0	0	0	250	0	0	0	0	0	0	0	0	0	0	0	0	0	0	0	0	0	0	0	125	0
2046	3	1	15.5288	62	33	2	3	4	15	5.903	0.04	0	18.662	0	0	24.605	0	0	0	0	0	0	0	0	0	0	0	200	0	0	0	0	0	0	0	0	0	0	0	0	0	0	0	0	0	0	0	125	0
2064	3	2	16.0877	62	33	2	3	4	16	29.0805	0	0	13.9965	1.35	0	44.427	0	0	0	0	0	0	0	0	0	0	250	0	0	0	0	0	0	0	0	0	0	0	0	0	0	0	0	0	0	0	0	250	0
2065	3	2	14.2877	62	33	2	3	4	14	26.88	0.015	0	0.08	0	0.25	27.225	0	0	0	0	0	0	0	0	0	0	0	225	0	0	0	0	0	0	0	0	0	0	0	0	0	0	0	0	0	0	0	0	0
2068	3	2	17.189	500	33	3	3	4	17	26.6685	0.0075	0	4.7255	0	0.25	31.6515	0	0	0	0	0	0	0	0	0	300	0	0	0	0	0	0	0	0	0	0	0	0	0	0	0	0	0	0	0	0	0	0	0
2092	3	1	17.5836	507	33	1	3	4	17	1.011	0	0	27.993	0	0	29.004	0	0	0	0	0	0	0	0	0	0	0	250	0	0	0	0	0	0	0	0	0	0	0	0	0	0	0	0	15	0	0	0	0
3013	3	1	13.4384	44	39	1	3	3	13	31.162	0	0	11.811	1.35	0	44.323	0	0	0	0	0	0	0	0	0	0	0	500	0	0	0	0	0	0	0	0	0	0	0	0	0	0	0	0	0	0	0	0	0
3028	3	1	13.5808	44	39	1	3	3	13	6.31288	0.6625	0.112	24.9705	0	0	32.0579	0	0	0	0	0	0	0	0	0	0	0	250	0	0	0	0	0	0	0	0	0	0	0	0	0	0	0	0	0	0	0	0	0
3087	3	2	12.9671	118	39	1	3	3	12	0.5295	0.0105	0	16.1975	0	0	16.7375	0	0	0	0	125	0	0	0	0	0	0	250	0	0	0	0	0	0	0	0	0	0	0	0	0	0	0	0	0	0	0	0	0
3109	3	2	15.7315	73	39	3	3	4	15	35.5665	0	0	9.4605	0	0.1	45.127	0	0	0	0	0	0	0	0	0	0	0	250	0	0	0	0	0	0	0	0	0	0	0	0	0	0	0	0	0	0	0	250	0
3169	3	2	17.0164	73	39	3	3	4	17	13.135	0.49	0	26.735	0.93	0	41.29	0	0	0	0	0	0	0	0	0	0	0	0	0	0	0	0	0	0	0	0	0	0	0	0	0	0	0	0	0	0	0	0	0
3182	3	2	15.5699	117	39	1	3	4	15	13.244	0.5775	0	27.252	0.93	0	42.0035	0	0	0	0	0	0	0	0	0	0	0	0	0	0	0	0	0	0	0	0	0	0	0	0	0	0	0	0	0	0	0	0	0
4016	3	1	14.6822	420	39	3	3	4	14	2.669	0.0845	0	27.993	0	0	30.7465	0	0	0	0	0	0	0	0	0	400	0	0	0	0	0	0	0	0	0	0	0	0	0	0	0	0	0	0	0	0	0	0	0
4034	3	2	12.9726	420	39	3	3	3	12	1.874	0	0	18.662	0	0	20.536	0	0	0	0	0	0	0	0	0	0	0	200	0	0	0	0	0	0	0	0	0	0	0	0	0	0	0	0	0	0	0	125	0
5048	3	1	13.5178	83	48	4	3	3	13	1.348	0.018	0	37.324	0	0	38.69	0	0	0	0	0	0	0	0	0	0	0	650	0	0	0	0	0	0	0	0	0	0	0	0	0	0	0	0	0	0	0	0	0
5056	3	2	14.5041	83	48	4	3	4	14	1.3696	0.7205	0	20.4148	0	0	22.5049	0	0	0	0	0	0	0	0	0	0	0	575	0	0	0	0	0	0	0	0	0	0	0	0	0	0	0	0	0	0	0	0	0
5069	3	1	16.7068	83	48	4	3	4	16	2.2589	0.838	0.063	22.798	0	0	25.9579	0	0	0	0	0	0	0	0	0	0	0	575	0	0	0	0	0	0	0	0	0	0	0	0	0	0	0	0	0	0	0	125	0
5074	3	2	17.5452	83	48	4	3	4	17	15.974	0.21	0	8.3855	0	0	24.5695	0	75	125	0	0	0	0	0	0	0	0	150	0	0	0	0	0	0	0	0	0	0	0	0	0	0	0	0	0	0	0	0	0
5083	3	1	17.3397	83	48	4	3	4	17	0.9625	0.03	0	5.0625	124.455	0	130.51	0	0	0	0	0	0	0	0	0	0	0	0	0	0	0	0	0	0	0	0	0	0	0	0	0	0	0	0	0	0	0	125	0
5103	3	1	12.211	83	48	4	3	3	12	12.4555	0.519	0	9.331	0.45	0	22.7555	0	0	0	0	0	0	0	0	0	0	0	300	0	0	0	0	0	0	0	0	0	0	0	0	0	0	0	0	0	0	0	0	0
5215	3	1	12.1123	514	20	3	3	3	12	3.592	0.3225	0	18.9425	0.06	0	22.917	0	0	0	0	0	0	0	0	0	0	200	0	0	0	0	0	0	0	0	0	0	0	0	0	0	0	0	0	0	0	0	0	0
5223	3	1	13.4027	517	20	1	3	3	13	16.0495	0.045	0	12.6185	0	0	28.713	0	0	0	0	0	0	0	0	0	0	0	400	0	0	0	0	0	0	0	0	0	0	0	0	0	0	0	0	0	0	0	125	0
5229	3	1	13.0192	510	20	3	3	3	13	13.6495	0.015	0	20.756	0	0	34.4205	0	0	0	0	0	0	0	0	0	0	0	650	0	0	0	0	0	0	60	0	0	0	0	0	0	0	0	0	0	0	0	125	0
5230	3	1	14.3425	514	20	3	3	4	14	16.9736	0.0225	0.07	15.601	0	0	32.6671	0	0	0	0	0	0	0	0	0	0	0	250	0	0	0	0	0	0	0	0	0	0	0	0	0	0	0	0	0	0	0	125	0
5231	3	2	14.4904	510	20	3	3	4	14	10.15	0.3025	0	2.5	0	0	12.9525	0	0	0	0	0	0	0	0	0	0	0	100	0	0	0	0	0	0	0	0	0	0	0	0	0	0	0	0	0	0	0	0	0
5235	3	2	15	510	20	3	3	4	15	14.831	0	0	6.4805	0	0	21.3115	0	0	0	0	0	0	0	0	0	0	400	0	0	0	0	0	0	0	0	0	0	0	50	0	0	0	0	0	0	0	0	0	0
5238	3	2	14.1836	510	20	3	3	4	14	11.792	0.0895	0	32.1094	0.7135	0	44.7044	0	0	0	0	0	0	0	0	0	200	0	0	0	0	0	0	0	0	0	0	0	0	0	0	0	0	0	0	0	0	0	0	0
5242	3	2	17.1315	510	20	3	3	4	17	31.9246	0.352	0.07	10.8035	1.35	0	44.5001	0	0	0	0	0	0	0	0	0	0	0	200	0	0	0	0	0	0	0	0	0	0	0	0	0	0	0	0	0	0	0	0	0
5265	3	1	16.9425	510	20	3	3	4	16	5.33123	0.325	0.14	18.812	0	0	24.6082	0	0	0	0	0	0	0	0	0	0	0	200	0	0	0	0	0	0	0	0	0	0	0	0	0	0	0	0	0	0	0	0	0
5317	3	2	13.3397	510	20	3	3	3	13	1.7806	0.1005	0	26.9668	0	0	28.8479	0	0	0	0	0	0	0	0	0	0	0	200	0	0	0	0	0	0	0	0	0	0	0	0	0	0	0	0	0	0	0	0	0
5320	3	2	14.263	510	20	3	3	4	14	1.011	0.0075	0	27.993	0	0	29.0115	0	0	0	0	0	0	0	0	0	0	0	200	0	0	0	0	0	0	0	0	0	0	0	0	0	0	0	0	0	0	0	250	0
5353	3	1	15.6438	510	20	3	3	4	15	1.83938	0.16	35.132	0	0	0	37.1314	0	0	0	0	0	0	0	0	0	0	0	0	0	0	0	0	0	0	0	0	0	0	0	0	0	0	0	0	0	0	0	0	0
5376	3	1	16.1534	510	20	3	3	4	16	0.9436	0.015	8.755	27.5993	0	0	37.3129	0	0	0	110	0	0	0	0	0	0	0	200	0	0	0	0	0	0	0	0	0	0	0	0	0	0	0	0	0	0	0	0	0
6004	3	2	16.9671	5	9	1	1	4	16	3.51	0.0225	0	22.506	0	0	26.0385	0	0	0	0	0	0	0	0	0	0	450	0	0	0	0	0	0	0	60	0	0	0	0	0	0	0	0	0	0	0	0	0	0
6021	3	1	12.0685	100	48	1	3	3	12	8.24431	0.045	0.035	26.5948	0.58125	0	35.5003	0	0	0	0	0	0	0	0	0	0	0	300	0	0	0	0	0	0	0	0	0	0	0	0	0	0	0	0	0	0	0	0	0
8006	3	2	17.1205	416	28	1	1	4	17	4.4585	0.4225	29.767	4.6655	0	0	39.3135	0	0	0	0	0	0	0	0	0	150	0	0	0	0	0	0	0	0	0	0	0	0	0	0	0	0	0	0	0	0	0	0	0
11017	3	2	17.7781	69	47	3	1	4	17	21.765	0.00055	0	0.26	0	0	22.0255	0	0	0	0	0	0	0	0	0	0	0	180	0	0	0	0	0	0	0	0	0	0	0	0	0	0	0	0	0	0	0	0	0
11037	3	2	13.3452	69	47	3	1	3	13	7.06219	0.535	0.056	2.665	0	0	10.3182	0	0	0	0	0	0	0	0	0	0	0	525	0	0	0	0	0	0	0	0	0	0	0	0	0	0	0	0	0	0	0	0	0
11061	3	1	17.1699	69	47	3	1	4	17	1.724	0	0	18.662	0	0	20.386	0	0	0	0	0	0	0	0	0	0	0	225	0	0	0	0	0	0	0	0	0	0	0	0	0	0	0	0	40	0	0	0	0
11070	3	1	16.3616	69	47	3	1	4	16	14.9582	0.075	0	27.8493	0.62775	0	43.5102	0	0	0	0	0	0	0	0	0	0	0	300	0	0	0	0	0	0	0	0	0	0	0	0	0	0	0	0	0	0	0	0	0
11080	3	2	13.3288	69	47	3	1	3	13	2.514	0.10683	0	27.993	0	0	30.6138	0	0	0	0	0	0	0	0	0	0	0	800	0	0	0	0	0	0	0	0	0	0	0	0	0	0	0	0	0	0	0	0	0
11089	3	1	13.8712	69	47	3	1	3	13	6.095	0.1975	0	18.662	0	0	24.9545	0	0	0	0	0	0	0	0	0	425	0	0	0	0	0	0	0	0	0	0	0	0	0	0	0	20	0	0	20	0	0	0	0
11128	3	2	12.6767	69	47	3	1	3	12	3.30313	0.393	0.203	16.8795	0	0	20.7786	0	0	0	0	0	0	0	0	0	0	0	200	0	0	0	0	0	0	0	0	0	0	0	0	0	0	0	0	0	0	0	0	0
13217	3	1	13.1315	101	2	1	1	3	13	1.59477	0.03	0.224	37.324	0	0	39.1728	0	0	0	0	0	0	0	0	0	0	500	0	0	0	0	0	0	0	0	0	0	0	0	0	0	0	0	0	0	0	0	0	0
13219	3	1	13.7096	101	2	1	1	3	13	0	0	0	0	0	0	0	0	0	0	0	0	0	0	0	0	0	0	0	0	0	0	0	0	0	0	0	0	0	0	0	0	0	0	0	0	0	0	0	0
14017	3	2	12.8658	134	13	2	1	3	12	1.6176	0.306	0	44.7888	0	0	46.7124	0	0	0	0	0	0	0	0	0	0	0	1000	0	0	0	0	0	0	0	0	0	0	0	0	0	0	0	0	0	0	0	0	0
14027	3	2	14.8329	204	13	1	1	4	14	5.4792	0.09	0	15.2296	0	0	20.7988	0	0	0	0	0	0	0	0	0	0	0	200	0	0	0	0	0	0	0	0	0	0	0	0	0	0	0	0	0	0	0	0	0
14075	3	1	12.0055	204	13	1	1	3	12	0.8088	0.06	0	22.3944	0	0	23.2632	0	0	0	100	0	0	0	0	0	0	0	600	0	0	0	0	0	0	0	0	0	0	0	0	0	0	0	0	0	0	0	0	0
14084	3	1	17.3123	67	13	3	1	4	17	1.5555	0.06	0.32	23.121	0	0	25.0565	0	0	0	0	0	0	0	0	0	0	0	225	0	0	0	0	0	0	0	0	0	0	0	0	40	0	0	0	0	0	0	0	0
14085	3	1	16.937	211	13	1	1	4	16	1.874	0	0	18.662	0	0	20.536	0	0	0	0	0	0	0	0	0	0	0	800	0	0	0	0	0	0	0	0	0	0	0	0	0	0	0	0	0	0	0	0	0
15020	3	2	13.5726	137	13	2	1	3	13	0.704846	0	0.028	19.902	0	0	20.6348	0	0	0	0	0	0	0	0	0	0	0	500	0	0	0	0	0	0	0	0	0	0	0	0	0	50	0	0	0	0	0	0	0
15021	3	2	12.2521	67	13	3	1	3	12	1.787	0	0	35.456	0	0	37.243	0	0	0	0	0	0	0	0	0	500	0	0	0	0	0	0	0	0	0	0	0	0	0	0	70	20	0	0	30	0	0	0	0
16006	3	1	12.3479	53	6	2	1	3	12	20.6187	0.0465	0	19.9337	0.58125	0	41.1803	0	0	0	0	0	0	0	0	0	0	0	250	0	0	0	0	0	0	0	0	0	0	0	0	0	0	0	0	0	0	0	0	0
16033	3	2	13.5644	53	6	2	1	3	13	1.387	0.0075	22.763	9.331	0	0	33.4885	0	0	0	0	0	0	0	0	0	0	0	200	0	0	0	0	0	0	0	0	0	0	0	0	0	0	0	0	0	0	0	0	0
16045	3	2	16.6521	102	6	1	1	4	16	1.4055	0.024	0	20.7235	0	0	22.153	0	0	0	0	0	0	0	0	0	0	0	360	0	0	0	0	0	0	0	0	0	0	0	0	0	0	0	0	0	0	0	0	0
16046	3	2	16.8822	102	6	1	1	4	16	0.6635	0.244	0	0.0004	0.016	0	0.9239	0	0	0	200	0	0	0	0	0	0	0	0	0	0	0	0	0	0	0	0	0	0	0	0	0	0	30	0	0	0	0	0	0
16065	3	1	17.9671	102	6	1	1	4	17	2.326	0.045	0.1704	29.3184	1.92	0	33.7798	0	0	0	0	0	0	0	0	0	0	0	250	0	0	0	0	0	0	0	0	0	0	0	0	0	0	0	0	0	0	0	0	0
16087	3	2	17.7507	53	6	2	1	4	17	25.4156	0.243	0	10.2548	0	0	35.9134	0	0	0	0	0	0	0	0	0	0	0	190	0	0	0	0	0	0	0	0	0	0	0	0	0	0	30	0	0	0	0	125	0
17022	3	2	13.8356	54	13	2	1	3	13	4.3844	0.82533	9.6305	13.7822	0	0	28.6224	0	0	0	0	0	0	0	0	0	500	0	0	0	0	0	0	0	0	0	0	0	0	0	0	0	0	0	0	0	0	0	0	0
17024	3	2	12.9178	54	13	2	1	3	12	1.1316	0.0105	0	20.6398	0	0	21.7819	0	0	0	0	0	0	0	0	0	0	0	400	0	0	0	0	0	0	0	0	0	0	0	0	0	0	0	0	20	0	0	0	0
17037	3	1	14.4438	54	13	2	1	4	14	0	0	0	0	0	0	0	0	0	0	0	0	0	0	0	0	0	0	200	0	0	0	0	0	0	0	0	0	0	0	0	0	0	0	0	0	0	0	0	0
17045	3	2	17.7808	54	13	2	1	4	17	0	0	0	23.064	0	0	23.064	0	0	0	0	0	0	0	0	0	0	0	600	0	0	0	0	0	0	0	0	0	0	0	0	0	0	0	0	60	0	0	0	0
17049	3	2	12.6164	54	13	2	1	3	12	14.198	0.0225	0.14	20.8597	0.58125	0	35.8015	0	0	0	0	0	0	0	0	0	0	0	0	0	0	0	0	0	0	0	0	0	0	0	0	0	0	0	0	0	0	0	0	0
20002	3	1	15.5589	82	29	4	4	4	15	1.5	0	0	15.376	0	0	16.876	0	0	0	0	0	0	0	0	0	0	0	200	0	0	0	0	0	0	0	0	0	0	0	0	0	0	0	0	0	0	0	0	0
20014	3	2	12.7315	141	29	2	4	3	12	26.4225	0.685	3.764	0	0.972	0	31.8435	0	0	0	0	0	140	0	0	0	0	0	0	0	0	0	0	0	20	0	0	0	0	20	0	0	0	0	0	0	0	0	0	0
21074	3	2	17.0329	234	41	2	4	4	17	11.3113	2.7105	0.042	12.408	0	0	26.4718	0	0	0	0	0	120	0	0	0	0	0	250	0	0	0	0	0	0	0	0	0	0	0	0	0	0	0	0	0	0	0	0	0
21091	3	2	16.4301	411	11	3	4	4	16	11.1732	0.015	0	16.3412	0.62775	0	28.1573	0	0	0	0	0	0	0	0	0	0	0	100	0	0	0	0	0	0	0	0	0	0	0	0	0	0	0	0	15	0	0	0	0
22040	3	2	12.0849	72	23	3	4	3	12	7.07	0	0	37.94	0.372	0	45.382	0	0	0	0	0	0	0	0	0	0	0	500	0	0	0	0	0	0	0	0	0	0	0	0	0	0	0	0	0	0	0	0	0
22041	3	1	16.6356	72	23	3	4	4	16	1.574	0	0	18.662	0	0	20.236	0	0	0	0	0	0	0	0	0	0	0	1000	0	0	0	0	0	0	0	0	0	0	0	0	0	0	0	0	0	0	0	0	0
22058	3	2	17.1918	72	23	3	4	4	17	1.5	0.015	0	0	0	0	1.515	0	0	0	0	0	0	0	0	0	0	0	0	0	0	0	0	0	0	0	0	0	0	0	0	0	0	0	0	0	0	0	0	0
24043	3	1	12.3808	60	23	2	4	3	12	20.0444	0.3825	0	0.03	0	0.125	20.5819	200	0	0	0	0	0	0	0	0	0	0	0	0	0	0	0	0	0	0	0	0	0	0	0	0	0	0	0	0	0	0	125	0
24053	3	1	15.7918	60	23	2	4	4	15	0.727981	0.153	0.049	26.35	0	0	27.28	0	0	0	0	0	0	0	0	0	0	0	400	0	0	0	0	0	0	0	0	0	0	0	0	0	0	0	0	20	0	0	125	0
24067	3	2	15.726	528	23	2	4	4	15	5.053	0.306	14.9061	6.112	0.48	0	26.8571	0	0	0	0	0	0	0	0	0	0	0	400	0	0	0	0	0	0	0	0	0	0	0	0	0	0	0	0	0	0	0	0	0
24068	3	1	15.4795	528	23	2	4	4	15	8.772	0.765	0.042	18.243	12.8275	0	40.6495	0	0	0	0	0	0	0	0	0	0	0	1000	0	0	0	0	0	0	0	0	0	0	0	0	0	0	0	0	0	0	0	0	0
24078	3	1	16.1452	528	23	2	4	4	16	12.8348	0.306	0.028	18.662	0	0	31.8308	0	0	0	0	0	0	0	0	0	0	0	450	0	0	0	0	0	0	0	0	0	0	0	0	0	0	0	0	0	0	0	0	0
25077	3	1	15.0411	120	41	2	4	4	15	1.388	0.339	0	40.765	0	0	42.492	0	0	0	0	0	0	0	0	0	0	0	250	0	0	0	0	0	0	0	0	0	0	0	0	0	0	0	0	0	0	0	0	0
25078	3	1	12.7562	120	41	2	4	3	12	2.174	0	0	20.212	0	0	22.386	0	0	0	0	0	0	0	0	0	0	0	300	0	0	0	0	0	0	0	0	0	0	0	0	0	0	0	0	0	0	0	0	0
26023	3	1	12.0082	29	7	1	2	3	12	12.1895	0.8165	0	17.0985	0	0	30.1045	0	0	0	0	0	0	0	0	0	0	0	500	0	0	0	0	0	0	0	0	0	0	0	0	0	0	0	0	0	0	0	0	0
27020	3	1	17.5836	56	8	2	2	4	17	1.09	1.0418	0	5.17	0	0	7.3018	0	0	0	0	0	0	0	0	0	0	0	110	0	0	0	0	0	0	0	0	0	0	60	10	0	0	0	0	40	0	0	125	0
27027	3	1	12.6082	56	8	2	2	3	12	3.989	0.2964	0.028	10.881	0	0	15.1944	0	0	0	0	0	0	0	0	0	0	0	400	0	0	0	0	0	0	0	0	0	0	0	0	0	0	0	0	0	0	0	0	0
27063	3	1	17.4767	56	8	2	2	4	17	16.728	0.8595	0	20.5712	0.792	0.285	39.2357	0	0	0	0	0	0	0	0	0	0	0	250	0	0	0	0	0	0	0	0	0	0	0	30	0	95	0	0	0	0	0	250	0
27064	3	1	16.9342	56	8	2	2	4	16	32.3155	0.3725	0.28	0	1.35	0	34.318	0	0	0	110	0	0	0	0	0	0	0	225	0	0	0	0	0	0	0	0	0	0	0	0	0	50	0	0	0	0	0	125	0
28026	3	1	15.1918	57	8	2	2	4	15	22.6584	0.69383	15.3405	0.986	0.9	0	40.5787	0	0	0	0	0	0	0	0	0	450	0	0	0	0	0	0	0	0	0	0	0	0	0	0	0	0	0	0	0	0	0	0	0
28027	3	2	15.0164	57	8	2	2	4	15	29.4431	0.88405	0.168	0	1.35	0	31.8451	0	0	0	0	0	0	0	0	0	0	0	0	0	0	0	0	0	0	0	0	0	0	0	0	0	20	0	0	0	0	0	0	0
28030	3	1	12.3616	57	8	2	2	3	12	8.1835	0.015	0	15.6975	0.6045	0	24.5005	0	0	0	0	0	0	0	0	0	0	0	0	0	0	0	0	0	0	0	0	0	0	0	0	0	0	0	0	0	0	0	0	0
29030	3	2	16.6658	58	8	2	2	4	16	0.9892	0.0225	29.767	14.9296	0	0	45.7083	150	0	0	0	0	0	0	0	0	0	0	300	0	0	0	0	0	0	0	0	0	0	0	0	0	0	0	0	0	0	0	0	0
29031	3	2	16.6	58	8	2	2	4	16	3.00392	0.1865	0.196	7.6888	124.487	0	135.562	0	0	0	0	0	0	0	0	0	0	0	0	0	0	0	0	0	0	0	0	0	0	0	0	0	0	0	0	0	0	0	0	0
30074	3	2	16.7589	24	43	1	2	4	16	2.57046	0.459	0.098	5.0625	0	0	8.18996	0	0	0	0	0	0	0	0	0	0	0	0	0	0	0	0	0	0	0	0	0	0	0	0	25	0	0	0	0	0	0	0	0
30076	3	1	12.8466	22	43	1	2	3	12	3.327	0	0	17.2112	0	0	20.5382	0	0	0	0	0	0	0	0	0	0	0	400	0	0	0	0	0	0	0	0	0	0	0	0	0	0	0	0	0	0	0	0	0
30082	3	1	14.5315	22	43	1	2	4	14	0.077115	0	0.07	23.064	0	0	23.2111	0	0	0	0	0	0	0	0	0	0	0	200	0	0	0	0	0	0	0	0	0	0	0	0	0	0	0	0	0	0	0	0	0
30086	3	2	14.4027	22	43	1	2	4	14	11.3187	0	0	16.6438	0.58125	0	28.5437	0	0	0	0	0	0	0	0	0	0	0	200	0	0	0	0	0	0	0	0	0	0	0	0	40	0	0	0	0	0	0	125	0
33005	3	1	17.126	79	8	4	2	4	17	0.05	0.0375	44.6505	0.04	0	0	44.778	0	0	0	0	0	0	0	0	0	0	0	200	0	0	0	0	0	0	0	0	0	0	0	0	0	0	0	0	0	0	0	0	0
33099	3	1	16.0219	79	8	4	2	4	16	14.836	0.846	0	9.331	0	0	25.013	0	0	0	140	0	0	0	0	0	0	0	200	0	0	0	0	0	0	0	0	0	0	0	0	0	0	0	0	0	0	0	375	0
33123	3	2	13.1425	79	8	4	2	3	13	1.79211	0.1905	0.2825	11.7559	6.73	0	20.751	0	0	0	0	0	180	0	0	0	0	0	150	0	0	0	0	0	0	0	0	0	0	0	0	30	0	0	0	0	0	0	0	0
33154	3	2	14.3699	79	8	4	2	4	14	16.875	0.2295	0	6.05	0	0	23.1545	0	0	0	0	0	0	0	0	0	0	0	0	0	0	0	0	0	0	0	0	0	0	0	0	0	0	0	0	0	0	0	0	0
33171	3	1	17.6767	79	8	4	2	4	17	20.4612	0.35	0.14	6.05	0	0	27.0012	200	0	0	0	0	0	0	0	0	200	0	0	0	0	0	0	0	0	0	0	0	0	0	0	0	0	0	0	0	0	0	0	0
34052	3	1	13.3425	80	50	4	2	3	13	1.36922	0.4975	0.014	24.9794	0	0	26.8601	0	0	0	0	0	0	0	0	0	0	0	400	0	0	0	0	0	0	0	0	0	0	0	0	0	0	0	0	0	0	0	0	0
34075	3	2	12.6658	80	50	4	2	3	12	0.924	0	0	4.86	82.97	0	88.754	0	0	0	0	0	0	0	0	0	0	0	0	0	0	0	0	0	0	0	0	0	0	0	0	0	0	0	0	0	0	0	0	0
34094	3	1	16.7068	80	50	4	2	4	16	6.9755	23.711	0	0.0006	0.024	0	30.7111	0	0	0	140	0	0	0	0	0	0	0	100	0	0	0	0	0	0	0	0	0	0	0	0	0	0	0	0	0	0	0	0	0
34095	3	1	17.7836	80	50	4	2	4	17	10.0001	1.0755	0.021	12.961	0	0	24.0576	0	0	0	0	0	0	0	0	0	0	0	200	0	0	0	0	0	0	0	0	0	0	0	0	0	0	0	0	0	0	0	200	0
35026	3	2	14.0247	70	8	3	2	4	14	12.0785	0.15	0	19.2615	0	0	31.49	0	0	0	0	0	0	0	0	0	0	0	200	0	0	0	0	0	0	0	0	0	0	0	0	0	0	0	0	0	0	0	125	0
36020	3	1	13.6685	84	46	4	5	3	13	2.10112	0.1215	0.07	18.692	0	0	20.9846	0	0	0	0	0	0	0	0	0	0	0	662	0	0	0	0	0	0	120	0	0	0	0	0	0	0	0	0	0	0	0	0	0
37014	3	2	16.0219	122	3	3	5	4	16	1.7088	0.015	0	22.3944	0	0	24.1182	0	0	0	0	0	0	0	0	0	400	0	0	0	0	0	0	0	0	0	0	0	0	0	0	0	0	0	0	0	0	0	0	0
37040	3	1	13.0986	413	3	1	5	3	13	3.261	0	0	29.6205	0	0	32.8815	0	0	0	0	0	0	0	0	0	0	0	400	0	0	0	0	0	0	0	0	0	0	0	0	0	0	0	0	0	0	0	0	0
38008	3	1	13	64	12	2	5	3	13	9.7795	0.0075	0	27.4435	0.6975	0	37.928	0	0	0	0	0	0	0	0	0	0	0	200	0	0	0	0	0	0	0	0	0	0	0	0	0	0	0	0	0	0	0	0	0
38012	3	2	12.3836	64	12	2	5	3	12	0.5055	0.015	0	19.7625	0	0	20.283	0	0	0	0	0	0	0	0	0	0	0	600	0	0	0	0	0	0	0	0	0	0	0	0	0	0	0	0	0	0	0	0	0
38015	3	1	12.4904	64	12	2	5	3	12	0.8425	0	0	34.8595	0	0	35.702	0	0	0	0	0	0	0	0	0	500	0	0	0	0	0	0	0	0	0	0	0	0	0	0	0	0	0	0	0	0	0	125	0
38016	3	1	12.1562	64	12	2	5	3	12	5.835	2.7505	0	15.339	0	0	23.9245	0	0	0	0	0	0	0	0	0	0	0	350	0	0	0	0	0	0	0	0	0	0	0	0	0	0	0	0	0	0	0	0	0
38023	3	1	14.7342	64	12	2	5	4	14	40.088	0	0	0.192	0	0.4	40.68	0	0	0	110	0	0	0	0	0	0	0	450	0	0	0	0	0	0	0	0	0	0	0	0	0	0	0	0	0	0	0	0	0
38032	3	2	13.6521	64	12	2	5	3	13	21.2572	0.19	0.14	9.331	0.9	0	31.8182	0	0	0	110	0	0	0	0	0	500	0	0	0	0	0	0	0	0	0	0	0	0	0	0	0	40	0	0	0	0	0	125	0
38094	3	1	13.1233	45	12	1	5	3	13	12.1443	0.306	0.077	33.5185	0.6975	0	46.7433	0	0	0	0	0	0	0	0	0	0	0	500	0	0	0	0	0	0	0	0	0	0	0	0	50	0	0	0	0	0	0	125	0
38155	3	2	17.5699	114	17	3	2	4	17	7.425	0.0075	0	3.97	0	0	11.4025	0	0	0	0	0	0	0	0	0	0	0	0	0	0	0	0	0	0	0	0	0	0	0	0	0	0	0	0	0	0	0	0	0
38209	3	1	14.1973	531	17	3	2	4	14	1.011	0	0	32.798	0	0	33.809	0	0	0	0	0	0	0	0	0	0	0	500	0	0	0	0	0	0	0	0	0	0	0	0	20	0	0	0	0	0	0	0	0
38210	3	1	15.389	531	17	3	2	4	15	1.6642	0	13.1325	16.4796	0	0	31.2763	0	0	0	0	0	0	0	0	0	0	0	500	0	0	0	0	0	0	0	0	0	0	0	0	0	0	0	0	0	0	0	0	0
39006	3	1	16.2767	85	35	4	6	4	16	1.525	0	0	33.655	0	0	35.18	0	0	0	0	0	0	0	0	0	0	0	175	0	0	0	0	0	0	0	0	0	0	0	0	0	0	0	0	0	0	0	0	0
39018	3	1	16.5589	85	35	4	6	4	16	6.674	0	0	18.662	0	0	25.336	0	0	0	0	0	0	0	0	0	0	200	0	0	0	0	0	0	0	0	0	0	0	0	0	0	0	0	0	0	0	0	0	0
39044	3	2	12.0575	85	35	4	6	3	12	3.8865	0	0	23.7245	0	0	27.611	0	0	0	0	0	0	0	0	0	0	0	200	0	0	0	0	0	0	0	0	0	0	0	30	0	40	0	0	0	0	0	0	0
41002	3	2	13.6822	81	41	4	4	3	13	0.626	0.634	0	0.1091	0.064	0	1.4331	0	0	0	100	0	0	0	0	0	0	0	125	0	0	0	0	0	0	0	0	0	0	0	0	60	0	0	0	0	0	0	0	0
81108	3	2	17.2027	78	28	4	1	4	17	0	0.2295	0	0.075	103.713	0	104.017	0	0	0	0	0	0	0	0	0	0	0	200	0	0	0	0	0	0	0	0	0	0	0	0	0	0	0	0	0	0	0	0	0
85006	3	2	12.1041	119	29	3	4	3	12	3.82811	0.1885	0.07	24.4287	0.028	0	28.5433	0	0	0	0	0	0	0	0	0	0	0	200	0	0	0	0	0	0	0	0	0	0	0	0	0	0	0	0	0	0	0	125	0
85008	3	2	16.4164	119	29	3	4	4	16	5.819	0.245	0	18.662	0	0	24.726	0	0	0	0	0	0	0	0	0	0	0	200	0	0	0	0	0	0	0	0	0	0	0	0	0	0	0	0	20	0	0	0	0
85013	3	2	13.1397	119	29	3	4	3	13	0.674	0	0	21.452	0	0	22.126	0	0	0	150	0	0	0	0	0	0	0	200	0	0	0	0	0	0	0	0	0	0	0	0	0	0	0	0	0	0	0	0	0
85030	3	1	16.0438	119	29	3	4	4	16	4.05313	0.6425	0.021	0.0013	0.052	0	4.76993	0	0	0	0	0	0	0	0	0	0	0	0	0	0	0	0	0	0	0	0	0	0	0	0	0	0	40	0	0	0	0	125	0
87033	3	1	15.9644	223	30	1	5	4	15	5.10988	0.749	0.112	27.1584	0.056	0	33.1853	0	0	0	0	0	0	0	0	0	0	0	200	0	0	0	0	0	0	0	0	0	0	0	0	0	0	0	0	0	0	0	0	0
87043	3	1	16.7096	217	30	1	5	4	16	15.59	0.015	0	24.15	0.93	0	40.685	0	0	0	0	0	0	0	0	0	0	0	400	0	0	0	0	0	0	0	0	0	0	0	0	0	0	0	0	0	0	0	125	0
87050	3	2	16.1479	218	30	1	5	4	16	1.011	0.03	0	27.993	0	0	29.034	0	0	0	0	0	0	0	0	0	0	600	0	0	0	0	0	0	0	0	0	0	0	0	0	0	0	0	0	30	0	0	0	0
87054	3	1	14.4521	222	30	1	5	4	14	3.1485	0.2795	0	18.6625	0.02	0	22.1105	0	0	0	0	0	0	0	0	0	0	200	0	0	0	0	0	0	0	0	0	0	0	0	0	0	0	0	0	0	0	0	0	0
88037	3	1	16.9041	129	46	1	5	4	16	31.7216	0.273	0.112	5.6786	1.35	0	39.1352	0	0	0	0	0	0	0	0	0	0	0	650	0	0	0	0	0	0	0	0	0	0	0	0	0	0	0	0	0	0	0	0	0
88073	3	2	17.3616	129	46	1	5	4	17	1.5588	14.465	0	22.3944	0	0	38.4182	0	0	0	0	0	0	0	0	0	400	0	0	0	0	0	0	0	0	0	0	0	0	0	0	0	0	0	0	40	0	0	0	0
88077	3	2	16.2301	84	46	4	5	4	16	10.9037	0	0	26.1261	0.7905	0	37.8203	0	0	0	0	0	0	0	0	0	400	0	0	0	0	0	0	0	0	0	0	0	0	0	0	0	0	0	0	0	0	0	0	0
88079	3	2	16.2466	84	46	4	5	4	16	3.0588	0	0	31.0434	0	0	34.1022	0	0	0	0	0	0	0	0	0	600	0	0	0	0	0	0	0	0	0	0	0	0	0	0	0	0	40	0	0	0	0	0	0
88096	3	2	15.2849	129	46	1	5	4	15	25.062	0.306	0	7.688	0	0	33.056	0	0	0	0	0	0	0	0	0	0	0	0	0	0	0	0	0	0	0	0	0	0	0	0	40	0	0	0	0	0	0	0	0
2038	3	2	12.3178	62	33	2	3	3	12	7.144	0.0765	26.265	0	0.225	0	33.7105	0	0	0	0	0	0	0	0	0	0	0	500	0	0	0	0	0	0	0	0	0	0	0	0	0	0	0	0	0	0	0	0	0
2042	3	2	12.5233	500	33	3	3	3	12	0.5055	0.015	0	23.6065	0	0	24.127	0	0	0	0	0	0	0	0	0	300	0	0	0	0	0	0	0	0	0	0	0	0	0	0	0	0	0	0	0	0	0	0	0
2047	3	1	14.9945	62	33	2	3	4	15	26.601	0.2675	0	11.532	1.125	0	39.5255	0	0	0	0	0	0	0	0	0	0	500	0	0	0	0	0	0	0	0	0	0	0	0	0	0	0	0	0	0	0	0	0	0
2052	3	1	15.1425	62	33	2	3	4	15	36.6271	0.1275	0.07	10.798	0	0.3	47.9226	0	0	0	0	0	0	0	0	0	0	0	450	0	0	0	0	0	0	0	0	0	0	0	0	0	0	0	0	0	0	0	125	0
2061	3	2	14	62	33	2	3	4	14	2.3	0	10.506	0.04	82.97	0	95.816	0	0	0	0	0	0	0	0	0	150	0	0	0	0	0	0	0	0	0	0	0	0	0	0	0	0	0	0	0	0	0	125	0
3120	3	1	16.1452	73	39	3	3	4	16	12.3839	0.20444	0.312	6.6375	0.498	0	20.0358	0	0	0	0	0	0	0	0	0	0	250	0	0	0	0	0	0	0	0	0	0	0	0	0	0	0	0	0	0	0	0	250	0
3133	3	1	15.3562	73	39	3	3	4	15	15.0085	0	0	28.8155	0.93	0	44.754	0	0	0	0	0	0	0	0	0	0	0	250	0	0	0	0	0	0	0	0	0	0	0	0	0	0	0	0	0	0	0	0	0
3181	3	2	17	117	39	1	3	4	17	12.59	0.0105	0	24.15	0.93	0	37.6805	0	0	0	0	0	0	0	0	0	0	500	0	0	0	0	0	0	0	0	0	0	0	0	0	0	0	0	0	0	0	0	0	0
4019	3	2	13.3644	420	39	3	3	3	13	1.424	0.045	0	18.662	0	0	20.131	0	0	0	0	0	0	0	0	0	0	200	0	0	0	0	0	100	0	0	0	0	0	0	0	0	0	0	0	0	0	0	0	0
4065	3	1	14.0986	420	39	3	3	4	14	12.0515	0.853	0	32.9615	0.6975	0	46.5635	0	0	0	0	0	0	0	0	0	0	0	450	0	0	0	0	0	0	0	0	0	0	0	0	0	0	0	0	0	0	0	0	0
5053	3	1	15.6438	510	20	3	3	4	15	1.83938	0.1825	35.132	0	0	0	37.1539	0	0	0	0	0	0	0	0	0	0	0	0	0	0	0	0	0	0	0	0	0	0	0	0	0	0	0	0	0	0	0	0	0
5061	3	2	15.5233	83	48	4	3	4	15	0.0632	0.0503	0	1.4725	0	0	1.586	0	0	0	0	0	0	0	0	0	0	0	0	0	0	0	0	0	0	0	0	0	0	0	0	0	0	0	0	0	0	0	0	0
5066	3	2	17.2658	83	48	4	3	4	17	11.03	0.0375	0	3.766	0	0	14.8335	0	0	0	0	0	0	0	0	0	220	0	0	0	0	0	0	0	0	0	0	0	0	0	0	0	0	0	0	0	0	0	0	0
5073	3	2	16.1123	83	48	4	3	4	16	19.2612	0.88827	0.091	3.627	0	0	23.8675	0	0	0	0	0	0	0	0	0	150	0	0	0	0	0	0	0	0	0	0	0	0	0	0	0	150	0	0	0	0	0	125	0
5079	3	1	15.8164	83	48	4	3	4	15	8.48409	0.2375	0.056	34.4365	0.4278	0	43.6419	0	0	0	0	0	0	0	0	0	0	0	375	0	0	0	0	0	0	0	0	0	0	0	0	24	0	0	0	40	0	0	0	0
5226	3	1	12.6767	516	20	2	3	3	12	4.299	0.83	0	36.923	0.08	0	42.132	0	0	0	0	0	0	0	0	0	500	0	0	0	0	0	0	0	0	0	0	0	0	0	0	0	0	0	0	0	0	0	125	0
5236	3	2	13.4274	513	20	2	3	3	13	17.7595	0.8455	0	11.1464	0.016	0	29.7674	0	0	0	0	0	0	0	0	0	0	0	400	0	0	0	0	0	0	0	0	0	0	0	0	0	0	0	0	0	0	0	0	0
5327	3	2	16.5699	510	20	3	3	4	16	2.7175	0.0075	0	23.3275	0	0	26.0525	0	0	0	0	0	0	0	0	0	0	0	200	0	0	0	0	0	0	0	0	0	0	0	0	0	0	0	0	0	0	0	0	0
5332	3	1	15.8301	510	20	3	3	4	15	3.087	0.1275	0	0	124.455	0	127.669	0	0	0	0	0	100	0	0	0	0	0	250	0	0	0	0	0	0	0	0	0	0	0	0	0	0	0	0	0	0	0	0	0
5372	3	1	15.9945	510	20	3	3	4	16	1.1696	0.231	0	26.1268	0	0	27.5274	0	0	0	0	0	0	0	0	0	0	0	150	0	0	0	0	0	0	0	0	0	0	0	0	0	0	0	0	0	0	0	125	0
5453	3	1	16.4493	510	20	3	3	4	16	1.83938	0.1825	35.132	0	0	0	37.1539	0	0	0	0	0	0	0	0	0	0	0	0	0	0	0	0	0	0	0	0	0	0	0	0	0	0	0	0	0	0	0	0	0
11003	3	2	17.4027	16	49	1	1	4	17	2.3335	0.2088	5.9165	25.7523	6.73	0	40.9412	0	0	0	0	0	100	0	0	0	0	0	300	0	0	0	0	0	0	0	0	0	0	0	0	0	5	0	0	5	0	0	0	0
11013	3	2	13.7644	16	49	1	1	3	13	3.374	0.0225	0	20.2345	0	0	23.631	0	0	0	0	0	125	0	0	0	0	0	500	0	0	0	0	0	0	0	0	0	0	0	0	0	0	0	0	0	0	0	0	0
11072	3	2	15.5644	69	47	3	1	4	15	1.08	0	38.522	1.4965	0	0	41.0985	0	0	0	0	0	0	0	0	0	600	0	0	0	0	0	0	0	0	0	0	0	0	0	0	0	0	0	0	0	0	30	0	0
13038	3	2	16.5288	101	2	1	1	4	16	7.9755	0.153	0	14.0445	0	0	22.173	0	0	0	0	0	0	0	0	0	400	0	0	0	0	0	0	0	0	0	0	0	0	0	0	0	0	0	0	0	0	0	0	0
13053	3	1	12.7479	101	2	1	1	3	12	26.5808	0.153	0.175	14.1705	0	0	41.0793	0	0	0	0	0	0	0	0	0	0	0	200	0	0	0	0	0	0	0	0	0	0	0	0	0	0	0	0	0	0	0	0	0
13057	3	2	12.7342	101	2	1	1	3	12	0.06	0.153	0	0.048	0	0	0.261	200	0	0	0	0	0	0	0	0	0	400	0	0	0	0	0	0	0	0	0	0	0	0	0	0	0	0	0	0	0	0	0	0
13216	3	1	13.3178	101	2	1	1	3	13	0.843115	0.04	21.9575	9.331	0	0	32.1716	0	0	0	0	0	0	0	0	0	200	0	0	0	0	0	0	0	0	0	0	0	0	0	0	60	0	0	0	0	0	0	125	0
14028	3	2	13.8904	211	13	1	1	3	13	14.3933	0.03	0.308	24.15	0.93	0	39.8113	0	0	0	0	0	0	0	0	0	0	0	450	0	0	0	0	0	0	0	0	0	0	0	0	0	0	0	0	0	0	0	0	0
15022	3	2	13.6521	206	13	1	1	3	13	0.674	0.015	12.257	20.212	0	0	33.158	0	0	0	0	0	0	0	0	0	0	0	250	0	0	0	0	0	0	0	0	0	0	0	0	0	0	0	0	0	0	0	0	0
15035	3	2	15.1562	136	13	1	1	4	15	24.5422	0.232	12.397	1.1484	1.162	0	39.4816	0	0	0	0	0	0	0	0	0	0	0	200	0	0	0	0	0	0	0	0	0	0	0	0	0	0	0	0	0	0	0	0	0
16005	3	1	12.3616	53	6	2	1	3	12	1.3775	0.928	0	19.2175	0	0	21.523	0	0	0	0	0	0	0	0	0	0	0	250	0	250	0	0	0	0	0	0	0	0	0	0	0	0	0	0	0	0	0	0	0
16014	3	1	12.1863	53	6	2	1	3	12	0.6066	0.0045	19.261	18.1908	0	0	38.0629	0	0	0	110	0	0	0	0	0	0	0	560	0	0	0	0	0	0	0	0	0	0	0	0	50	0	0	0	0	0	0	0	0
16027	3	1	14.4164	53	6	2	1	4	14	3.3075	0.018	0	18.662	0	0	21.9875	0	0	0	0	0	0	0	0	0	540	0	0	0	0	0	0	0	0	0	0	0	0	0	0	0	0	0	0	0	0	0	0	0
16039	3	1	15.0274	53	6	2	1	4	15	11.4207	0.021	0	32.3284	0.81375	0	44.5838	0	0	0	0	0	0	0	0	0	0	0	360	0	0	0	0	0	0	0	0	0	0	0	0	0	0	0	0	15	0	0	0	0
17027	3	2	17.663	54	13	2	1	4	17	4.865	0.192	0.66	20.558	0.018	0	26.293	0	0	0	0	0	0	0	0	0	0	0	0	0	0	0	0	0	0	0	0	0	0	0	0	0	0	0	0	0	0	0	0	0
17075	3	1	14.8548	54	13	2	1	4	14	0.4044	0.312	9.6305	11.1972	0	0	21.5441	0	0	0	0	0	0	0	0	0	0	0	450	0	0	0	0	0	0	0	0	0	0	0	0	0	0	0	0	0	0	0	0	0
20004	3	1	12.2575	82	29	4	4	3	12	24.7421	0.3089	0.335	21.62	0.675	0	47.681	0	0	0	0	0	0	0	0	0	200	0	0	0	0	0	0	0	0	0	0	0	0	50	0	0	0	0	0	0	0	0	0	0
20009	3	1	17.1288	82	29	4	4	4	17	13.4492	0.209	0.056	20.181	0.45	0	34.3452	0	0	0	0	0	0	0	0	0	0	0	350	0	0	0	0	0	0	0	0	0	0	0	0	0	0	0	0	0	0	0	0	0
22004	3	2	16.8466	72	23	3	4	4	16	0.674	0	0	22.561	0	0	23.235	0	0	0	0	0	0	0	0	0	0	0	250	0	0	0	0	0	0	0	0	0	0	0	0	0	0	0	0	0	0	0	0	0
22021	3	2	15.6932	72	23	3	4	4	15	7.37408	0.075	0.168	22.231	0.372	0.342	30.5621	0	0	0	0	0	0	0	0	0	0	0	300	0	0	0	0	0	0	0	0	0	0	0	0	0	0	0	0	40	0	0	0	0
22022	3	1	17.8932	72	23	3	4	4	17	8.5455	0.075	0.182	18.165	0.372	0	27.3395	0	0	0	0	0	0	0	0	0	0	0	550	0	0	0	0	0	0	0	0	0	0	0	0	40	0	0	0	0	0	0	0	0
22043	3	2	16.4904	72	23	3	4	4	16	3.227	0.648	0	26.037	0	0	29.912	0	0	0	0	0	0	0	0	0	0	0	250	0	0	0	0	0	0	0	0	0	0	0	0	0	0	0	0	0	0	0	0	0
22047	3	2	14.5479	72	23	3	4	4	14	38.0722	0.774	0.238	4.5825	0.45	0.25	44.3667	0	0	0	0	0	0	0	0	0	0	0	0	0	0	0	0	0	0	250	0	0	0	0	0	0	0	0	0	0	0	0	0	0
22066	3	2	12.6027	104	4	1	4	3	12	1.40969	0	0.056	37.324	0	0	38.7897	0	0	0	0	0	0	0	0	0	0	0	500	0	0	0	0	0	0	0	0	0	0	0	0	0	0	0	0	0	0	0	0	0
24054	3	1	13.7671	60	23	2	4	3	13	1.14407	0.153	0.105	27.993	0	0	29.3951	0	0	0	0	0	0	0	0	0	0	0	200	0	0	0	0	0	0	0	0	0	0	0	0	75	0	0	0	0	0	0	0	0
24072	3	2	15.4274	528	23	2	4	4	15	0.1685	0	29.767	4.6655	0	0	34.601	0	0	0	0	0	0	0	0	0	0	0	300	0	0	0	0	0	0	0	0	0	0	0	0	0	0	0	0	0	0	0	0	0
25033	3	1	14.6356	120	41	2	4	4	14	0.337	0	0	11.656	0	0	11.993	0	0	0	0	0	0	0	0	0	0	0	250	0	0	0	0	0	0	0	0	0	0	0	0	0	0	0	0	0	0	0	0	0
25058	3	1	14.274	120	41	2	4	4	14	2.539	0.015	0.08	21.367	1.8325	0	25.8335	0	0	0	0	125	0	0	0	0	0	0	500	0	0	0	0	0	0	0	0	0	0	0	0	0	0	0	0	0	0	0	0	0
26005	3	2	15.063	28	7	1	2	4	15	10.379	0.056	0	9.8272	0.008	0	20.2702	0	0	0	0	0	0	0	0	0	200	0	0	0	0	0	0	0	0	0	0	0	0	0	0	0	0	0	0	0	0	0	0	0
27053	3	2	12.3288	56	8	2	2	3	12	3.424	0.0459	0	26.096	0	0	29.5659	0	0	0	0	0	0	0	0	0	0	0	200	0	0	0	0	0	0	60	0	0	0	0	10	0	0	0	0	0	0	0	0	0
27065	3	1	16.8055	56	8	2	2	4	16	41.3516	0.8735	0.021	1.9375	0.45	0	44.6336	0	0	0	0	0	0	0	0	0	0	0	200	0	0	0	0	0	0	0	0	0	0	0	0	0	10	0	0	0	0	0	0	0
30023	3	2	16.8493	21	43	1	2	4	16	10.455	0	0	23.175	0.6975	0	34.3275	0	0	0	0	0	0	0	0	0	0	0	0	0	0	0	0	0	0	0	0	0	0	0	0	0	0	0	0	40	0	0	0	0
30049	3	2	14.6356	23	43	1	2	4	14	12.5775	1.8075	0	25.8675	0.6975	0	40.95	0	0	0	0	0	0	0	0	0	200	0	0	0	0	0	0	0	0	0	0	0	0	0	0	20	0	0	0	0	0	0	0	0
30052	3	2	12.1863	23	43	1	2	3	12	11.2795	0.2295	0	30.5187	0.6975	0	42.7252	0	0	0	0	0	0	0	0	0	0	0	200	0	0	0	0	0	0	0	0	0	0	0	0	0	0	0	0	0	0	0	0	0
30081	3	2	14.2164	22	43	1	2	4	14	19.3694	0.95	0.196	18.1125	0.6975	0	39.3254	0	40	0	0	0	0	0	0	0	0	0	200	0	0	0	0	0	0	0	0	0	0	0	0	40	0	0	0	0	0	0	0	0
33011	3	1	12.126	79	8	4	2	3	12	11.7074	0	0.056	26.1827	0.86025	0	38.8064	0	0	0	0	0	100	0	0	0	0	0	500	0	0	0	0	0	0	0	0	0	0	0	0	0	0	0	0	0	0	0	0	0
33016	3	2	17.189	79	8	4	2	4	17	18.4031	2.5404	0.056	0.08	0	0	21.0795	0	0	0	0	0	0	0	0	0	0	0	350	0	0	0	0	0	0	0	0	0	0	0	60	0	0	0	0	20	0	0	125	0
33028	3	1	12.3534	79	8	4	2	3	12	1.174	0.3	14.8835	6.006	0	0	22.3635	0	0	0	0	0	0	0	0	0	0	0	450	0	0	0	0	0	0	0	0	0	0	0	0	0	0	10	0	0	0	0	125	0
33094	3	1	13.7315	79	8	4	2	3	13	11.4983	0.015	0	16.3012	0.62775	0	28.4423	0	0	0	0	0	0	0	0	0	0	0	600	0	0	0	0	0	0	0	0	0	0	0	0	0	0	0	0	0	0	0	0	0
33124	3	2	12.0877	79	8	4	2	3	12	7.46923	0.03	0.14	13.674	0	0	21.3132	0	0	0	0	0	90	0	0	0	400	0	140	0	0	0	0	0	0	0	0	0	0	0	0	0	0	0	0	20	0	0	0	0
33164	3	1	16.1808	79	8	4	2	4	16	23.299	0.0075	0	8.8605	0.1845	0	32.3515	0	0	0	0	0	0	0	0	0	0	0	300	0	0	0	0	0	0	0	0	0	0	0	0	60	0	0	0	0	0	0	0	125
34048	3	2	13.7014	80	50	4	2	3	13	14.0421	0.3285	7.9495	6.616	0	0	28.9361	0	0	0	0	0	0	0	0	0	0	0	240	0	0	0	0	0	0	0	0	0	0	0	0	0	0	0	0	0	0	0	0	0
34049	3	2	13.9041	80	50	4	2	3	13	9.737	0	0	21.765	0.651	0	32.153	0	0	0	0	0	0	0	0	0	0	0	375	0	0	0	0	0	0	0	0	0	0	0	0	10	0	0	0	0	0	0	0	0
34056	3	1	14.1452	80	50	4	2	4	14	3.1044	0.0645	10.506	11.1972	0	0	24.8721	0	0	0	0	0	0	0	0	0	0	480	0	0	0	0	0	0	0	0	0	0	0	0	0	0	30	30	0	30	0	0	0	0
35024	3	2	16.737	70	8	3	2	4	16	16.9265	0.5695	0.084	10.7445	0.02	0	28.3445	0	0	0	0	0	0	0	0	0	0	0	0	0	0	0	0	0	0	0	0	0	0	0	0	0	0	30	0	0	0	0	0	0
35029	3	1	13.6959	70	8	3	2	3	13	5.078	0.9965	0	26.038	0	0	32.1125	0	0	0	0	0	0	0	0	0	0	0	125	0	0	0	0	0	0	60	0	0	0	0	0	0	0	0	0	0	0	0	0	0
36011	3	2	13.7014	84	46	4	5	3	13	10.1141	0.36	2.276	13.9965	0	0	26.7466	0	0	0	0	0	0	0	0	0	0	0	200	0	0	0	0	0	0	0	0	0	0	0	0	0	0	0	0	0	0	0	0	0
36023	3	2	13.8466	84	46	4	5	3	13	16.575	0	0	6.05	0	0	22.625	0	0	0	0	0	0	0	0	0	250	0	0	0	0	0	0	0	0	0	0	0	0	0	0	0	0	0	0	0	0	0	374	0
37037	3	1	16.9068	122	3	3	5	4	16	1.73023	34.68	0.504	1.745	0	0	38.6592	200	0	0	140	0	0	0	0	0	200	0	0	0	0	0	0	0	0	0	0	0	0	0	0	0	0	0	0	0	0	0	0	0
38026	3	1	13.9699	64	12	2	5	3	13	9.7795	0.0225	0	27.4435	0.6975	0	37.943	0	0	0	0	0	0	0	0	0	0	0	250	0	0	0	0	0	0	0	0	0	0	0	0	0	0	0	0	0	0	0	250	0
38069	3	2	17.4904	64	12	2	5	4	17	0.31846	0.0776	0.28	1.55	0	0	2.22606	0	0	0	125	0	0	0	0	0	0	200	0	0	0	0	0	0	0	0	0	0	0	0	0	0	0	0	0	0	0	0	0	0
38081	3	1	12.6301	107	12	2	5	3	12	3.3395	0.2543	0	21.6845	0	0.0456	25.3239	0	0	0	0	0	0	0	0	0	260	0	0	0	0	0	0	0	0	0	120	0	0	0	0	0	0	0	0	0	0	0	0	0
38183	3	1	14.4822	115	17	1	2	4	14	21.2984	0.8305	2.774	3.102	0.9	0	28.9049	0	0	0	0	110	0	0	0	0	0	0	750	0	0	0	0	0	0	0	0	0	0	0	0	0	30	0	0	20	0	0	0	0
38191	3	2	16.4658	530	17	1	2	4	16	16.51	4.5085	0	2.42	0	0	23.4385	0	0	0	0	0	0	0	0	0	0	0	0	0	0	0	0	0	0	0	0	0	0	0	0	0	0	0	0	0	0	0	0	0
38214	3	2	15.3068	531	17	3	2	4	15	0	0.0225	0	0	0	0	0.0225	0	0	0	0	0	0	0	0	0	250	0	0	0	0	0	0	0	0	0	0	0	0	0	0	0	0	0	0	0	0	0	0	0
39017	3	2	17.5123	85	35	4	6	4	17	3.337	0.0225	0	22.413	0	0	25.7725	0	0	0	0	0	0	0	0	0	0	0	200	0	0	0	0	0	0	0	0	0	0	0	0	0	0	0	0	0	0	0	0	0
39064	3	1	12.0411	85	35	4	6	3	12	2.511	0.03	0	45.291	0	0	47.832	0	0	0	160	0	0	0	0	0	0	0	400	0	0	0	0	0	0	0	0	0	0	0	0	0	0	0	0	0	0	0	0	0
81116	3	2	17.3151	78	28	4	1	4	17	1.09527	0.5355	22.805	18.662	0	0	43.0978	0	0	0	0	0	0	0	0	0	0	0	250	0	0	0	0	0	0	0	0	0	0	0	0	0	0	0	0	0	0	0	0	0
85001	3	2	13.4466	119	29	3	4	3	13	2.864	1.66	0	39.572	0	0	44.096	0	0	0	0	0	0	0	0	0	0	0	250	0	0	0	0	0	0	0	0	0	0	0	0	0	0	0	0	0	0	0	0	0
87003	3	2	13.0027	217	30	1	5	3	13	2.37762	29.3055	0.07	9.425	0.0815	0	41.2596	0	0	0	0	0	0	0	0	0	0	0	250	0	0	0	0	0	0	0	0	0	0	0	0	0	0	0	0	0	0	0	0	0
87025	3	1	16.0959	218	30	1	5	4	16	2.2175	29.2755	0	13.5165	0.02	0	45.0295	0	0	0	0	0	0	0	0	0	0	0	200	0	0	0	0	0	0	0	0	0	0	0	0	40	0	0	0	20	0	0	0	0
88065	3	2	13.3781	84	46	4	5	3	13	1.6808	0.76	8.755	26.5304	0	0	37.7262	0	0	0	0	0	0	0	0	0	0	0	400	0	0	0	0	0	0	0	0	0	0	0	0	0	0	0	0	0	0	0	0	0
88067	3	1	12.2055	84	46	4	5	3	12	38.675	0.153	0	5.055	0	0	43.883	0	0	0	140	0	0	0	0	0	0	0	400	0	0	0	0	0	0	0	0	0	0	0	0	0	0	0	0	0	0	0	0	0
88081	3	2	17.7589	84	46	4	5	4	17	1.30743	0.806	17.65	12.3696	0	0	32.133	0	0	0	0	0	0	0	0	0	200	0	0	0	0	0	0	0	0	0	0	0	0	0	0	0	50	0	0	20	0	0	250	0
89013	3	2	13	82	29	4	4	3	13	0.246768	0	22.987	13.392	0	0	36.6258	0	0	0	0	0	0	0	0	0	0	0	200	0	0	0	0	0	0	0	0	0	0	0	0	0	0	0	0	0	0	0	0	0
2114	4	2	23.8	504	33	1	3	5	23	2.65	0.045	0	29.82	0	0	32.515	150	0	0	0	0	0	0	0	0	0	0	0	0	0	0	0	0	50	0	0	0	0	0	0	40	0	50	0	0	0	0	0	0
3096	4	2	19.8301	73	39	3	3	5	19	23.904	0.6675	0	3.102	0.9	0	28.5735	0	0	0	0	0	0	0	0	0	0	0	0	0	0	0	0	0	0	0	0	0	0	0	0	0	0	0	0	0	0	0	0	0
27036	4	2	22.9068	56	8	2	2	5	22	0.1245	0.0765	0	0.14025	124.547	0	124.888	0	0	0	0	0	0	0	0	0	175	0	0	0	0	0	0	0	0	0	0	0	0	0	0	0	0	0	15	0	0	0	0	0
38164	4	1	18.5507	114	17	3	2	5	18	0.030846	0.015	0.028	0	0	0	0.073846	0	0	0	0	0	0	0	0	0	0	0	0	0	0	0	0	0	0	0	0	0	0	0	0	0	0	0	0	0	0	0	250	0
89001	4	2	20.663	82	29	4	4	5	20	4.18354	0.918	0.084	3.102	124.455	0.171	132.914	0	0	0	265	0	0	0	0	0	0	0	0	0	0	0	0	0	0	0	0	0	0	0	0	50	0	0	0	0	0	0	0	0
7028	4	2	21.1342	83	48	4	3	5	21	6.8695	0	0	32.6585	0	0	39.528	0	0	0	0	0	0	0	0	0	250	0	50	0	0	0	0	0	0	0	0	0	0	0	0	0	0	0	0	0	0	0	0	0
11052	4	2	21.6904	69	47	3	1	5	21	9.314	0.287	0	18.6634	0.056	0	28.3204	0	0	0	0	0	0	0	0	0	0	0	400	0	0	0	0	0	0	0	0	0	0	0	0	0	0	0	0	0	0	0	0	0
14049	4	2	20.5863	204	13	1	1	5	20	1.011	0	0	28.293	0	0	29.304	0	0	0	0	0	0	0	0	0	0	0	300	0	0	0	0	0	0	0	0	0	0	0	0	0	0	0	0	0	0	0	0	0
21051	4	1	22.0575	410	41	2	4	5	22	1.5	0.0225	0.132	1.98	0	0	3.6345	0	0	0	0	0	0	0	0	0	0	0	0	0	0	0	0	0	0	0	0	0	0	0	0	0	0	0	0	0	0	0	0	0
24057	4	2	18.5068	60	23	2	4	5	18	8.52259	0.306	0.42	17.8405	0	0	27.0891	0	0	0	0	0	0	0	0	0	0	0	200	0	0	0	0	0	0	0	0	0	0	0	0	0	0	0	0	0	0	0	0	0
29032	4	1	24.0411	58	8	2	2	5	24	15.63	0.03	0.084	5.866	0.675	0	22.285	0	0	0	0	0	0	0	0	0	0	0	330	0	0	0	0	0	0	0	0	0	0	0	0	0	0	0	0	0	0	0	50	0
36018	4	2	22.537	84	46	4	5	5	22	0.827115	0.0375	0.07	0	0	0	0.934615	0	0	0	70	0	0	0	0	0	0	0	0	0	0	0	0	0	0	0	0	0	0	0	0	0	0	0	0	20	0	0	0	0
36026	4	1	23.4822	84	46	4	5	5	23	5.423	0	17.51	18.9425	0.1845	0	42.06	0	0	0	0	0	0	0	0	0	0	0	200	0	0	0	0	0	0	0	0	0	0	0	0	0	0	0	0	0	0	0	0	0
87030	4	1	18.0767	217	30	1	5	5	18	0.64	46.713	0	0.032	0	0	47.385	0	0	0	0	0	0	0	0	0	0	0	200	0	0	0	0	0	0	0	0	0	0	0	0	0	0	0	0	0	0	0	0	0
2072	4	1	22.0548	503	33	3	3	5	22	10.072	0.0075	0	19.32	0.744	0	30.1435	0	0	0	0	0	0	0	0	0	0	500	0	0	0	0	0	0	0	0	0	0	0	0	0	50	0	0	0	10	0	0	0	125
2077	4	1	20.3479	505	33	1	3	5	20	4.837	0.015	17.51	9.331	0	0	31.693	0	0	0	0	0	0	0	0	0	0	0	300	0	0	0	0	0	0	0	0	0	0	0	0	40	0	0	0	0	0	0	0	0
2088	4	1	21.5233	62	33	2	3	5	21	12.0225	0.4655	0	1.3525	41.935	0	55.7755	0	0	100	0	0	0	0	0	0	0	500	100	0	0	0	0	0	0	0	0	0	0	0	0	0	0	0	0	0	0	0	0	0
3005	4	2	22.9315	44	39	1	3	5	22	25.08	0	0	0.14	0	0.25	25.47	0	0	0	0	0	0	0	0	0	0	0	200	0	0	0	0	0	0	0	0	0	0	0	0	0	0	0	0	0	0	0	0	0
3017	4	2	21.8301	44	39	1	3	5	21	19.3435	0.3055	0	0.0001	0.904	0	20.5531	0	0	0	0	0	0	0	0	0	0	0	0	0	0	0	0	0	0	0	0	0	0	0	0	0	0	0	0	0	0	0	0	0
3023	4	1	23.5699	44	39	1	3	5	23	24.2276	0.3375	0.168	4.6655	0.9	0	30.2986	0	0	0	0	0	180	0	0	0	0	0	250	0	0	0	0	0	0	0	0	0	0	0	0	0	0	0	0	0	0	0	0	0
3029	4	1	22.0521	44	39	1	3	5	22	21.0364	0.238	0.112	0	0.9	0	22.2864	0	0	0	0	0	0	0	0	0	0	0	0	0	0	0	0	0	0	0	0	0	0	0	0	0	0	0	0	0	0	0	125	0
3031	4	1	18.8493	44	39	1	3	5	18	8.20575	0	0	24.4247	0.58125	0	33.2118	0	0	0	0	0	0	0	0	0	0	0	250	0	0	0	0	0	0	0	0	0	0	0	0	0	0	0	0	0	0	0	0	0
3050	4	2	22.3425	44	39	1	3	5	22	22.0077	0.4975	0.272	16.73	0.9	0	40.4072	0	0	0	0	0	0	0	0	0	0	0	0	0	0	0	0	0	0	0	0	0	0	0	0	0	0	0	0	0	0	0	0	0
3052	4	2	20.126	44	39	1	3	5	20	21.637	0	0	9.331	0.9	0	31.868	0	0	0	0	0	0	0	0	0	0	0	500	0	0	0	0	0	0	0	0	0	0	0	0	0	0	0	0	20	0	0	0	0
3073	4	1	23.3507	73	39	3	3	5	23	4.549	0.0825	0	4.6655	0	0	9.297	0	0	0	0	0	0	0	0	0	0	0	300	0	0	0	0	0	0	0	0	0	0	0	0	0	0	0	0	0	0	0	0	0
3115	4	1	22.2055	73	39	3	3	5	22	12.59	0.0675	0	24.15	0.93	0.228	37.9655	0	0	0	0	0	0	0	0	0	0	0	150	0	0	0	0	0	0	0	0	0	0	0	0	0	0	0	0	0	0	0	0	0
3135	4	1	22.0137	73	39	3	3	5	22	24.837	0.12	0	0	0.9	0	25.857	0	0	0	0	0	0	0	0	0	0	0	0	0	0	0	0	0	0	0	0	0	0	0	0	0	0	0	0	0	0	0	0	0
3164	4	2	20.1096	73	39	3	3	5	20	1.79	0.54	0	0.04	0	0	2.37	0	0	0	0	0	0	0	0	0	0	0	200	0	0	0	0	0	0	0	0	0	0	0	0	0	0	0	0	30	0	0	0	0
5108	4	2	20.389	83	48	4	3	5	20	13.2674	0.795	0.063	18.662	0.45	0	33.2374	0	0	0	0	0	0	0	0	0	500	0	0	0	0	0	0	0	0	0	0	0	0	0	0	0	0	0	0	0	0	0	0	0
5110	4	2	24.0603	83	48	4	3	5	24	17.6952	0.71	0.14	3.675	0	0	22.2202	0	0	0	0	0	0	0	0	0	0	0	225	0	0	0	0	0	0	0	0	0	0	0	0	0	0	0	0	0	0	0	0	0
5127	4	2	20.3479	83	48	4	3	5	20	26.5733	0.2165	0.21	0.2488	1.125	0	28.3736	0	0	0	0	0	0	0	0	0	134	0	60	0	0	0	0	0	0	0	0	0	0	0	20	0	0	0	0	0	0	0	0	0
5128	4	2	20.9671	83	48	4	3	5	20	7.7383	0.05542	0	16.8795	0	0	24.6732	0	0	0	0	0	135	0	0	0	400	0	0	0	0	0	0	0	0	0	0	0	0	0	0	0	0	0	0	0	0	0	0	0
5246	4	2	19.2822	514	20	3	3	5	19	3.4295	0.0075	0	32.6585	0	0	36.0955	200	0	0	0	0	0	0	0	0	300	0	0	0	0	0	0	0	0	0	0	0	0	0	0	0	0	0	0	0	0	0	0	0
5250	4	2	22.4986	514	20	3	3	5	22	31.265	0.5475	0.08	1.36	1.35	0	34.6025	0	0	0	0	0	0	0	0	0	0	0	200	0	0	0	0	0	0	0	0	0	0	0	0	0	0	30	0	60	0	0	0	0
5260	4	1	23.5836	511	20	2	3	5	23	19.242	0.085	0	4.455	0	0	23.782	0	0	0	0	0	0	0	0	0	0	0	400	0	0	0	0	0	0	0	0	0	0	0	0	0	0	0	0	0	0	0	0	0
5273	4	2	24.3178	510	20	3	3	5	24	42.1185	0.09	0	0.18	0.9	0	43.2885	0	0	0	0	0	0	0	0	0	0	55	60	0	0	0	0	0	0	0	0	0	0	0	0	0	0	0	0	0	0	0	0	0
5333	4	2	20.5836	510	20	3	3	5	20	0.9436	0.0375	0	26.1268	0	0	27.1079	0	0	0	0	0	0	0	0	0	150	0	0	0	0	0	0	0	0	0	0	0	0	0	0	0	0	0	0	0	0	0	0	0
5340	4	1	21.2	510	20	3	3	5	21	2.28312	0.1025	0.07	37.324	0	0	39.7796	0	0	0	0	0	100	0	0	0	0	0	200	0	0	0	0	0	0	0	0	0	0	0	0	0	0	0	0	0	0	0	125	0
5341	4	1	21.8	510	20	3	3	5	21	2.0136	0.015	0	26.1428	0	0	28.1714	0	0	0	0	0	0	0	0	0	0	0	200	0	0	0	0	0	0	0	0	0	0	0	0	0	0	0	0	0	0	0	0	0
5349	4	2	21.5397	510	20	3	3	5	21	12.8547	0.245	0.322	13.708	0.45	0	27.5797	0	0	0	0	0	0	0	0	0	0	0	140	0	0	0	0	0	0	0	0	0	0	0	0	0	0	0	0	0	0	0	125	0
5352	4	2	21.3151	514	20	3	3	5	21	2.0016	0.08	0	26.1668	0	0	28.2484	0	0	0	110	0	0	0	0	0	0	0	180	0	0	0	0	0	0	0	0	0	0	0	0	0	0	0	0	0	0	0	0	0
5356	4	2	25.1315	516	20	2	3	5	24	7.08411	0.12	0.17	1.644	0	0	9.01811	0	0	0	0	0	0	0	0	0	0	120	20	0	0	0	0	0	0	0	0	0	0	0	0	0	0	0	0	10	0	0	0	0
5361	4	1	25.5808	514	20	3	3	5	24	20.6983	0.12	0.21	0.104	0.9	0	22.0323	0	0	0	0	0	0	0	0	0	0	0	400	0	0	0	0	0	0	0	0	0	0	0	0	0	0	0	0	0	0	0	0	0
5366	4	1	18.0356	510	20	3	3	5	18	2.19615	0.0225	0.21	0.5236	83.3144	0	86.2666	0	0	0	110	0	0	0	0	0	0	0	500	0	0	0	0	0	0	0	0	0	0	0	0	0	0	0	0	0	0	0	0	0
5380	4	1	26.0274	510	20	3	3	5	24	3.02	0	0	19.236	0	0	22.256	0	0	0	0	0	0	0	0	0	0	0	150	0	0	0	0	0	0	0	0	0	0	0	0	0	0	0	0	0	0	0	0	0
5508	4	2	24.3918	75	1	3	3	5	24	26.7142	0.579	0.189	0.016	0.45	0	27.9482	0	0	0	0	0	0	0	0	0	0	0	280	0	0	0	0	0	0	0	0	0	0	0	0	0	0	0	0	0	0	0	125	0
5514	4	2	24.1671	75	1	3	3	5	24	19.009	0.442	0	0.2672	0.5155	1.405	21.6387	0	0	0	0	0	0	0	0	0	0	225	290	0	0	0	0	0	0	0	0	0	0	0	15	0	0	0	0	0	0	0	0	0
5517	4	2	23.4247	75	1	3	3	5	23	0.928769	0	0.042	24.832	0	0	25.8028	0	0	0	0	0	0	0	0	0	0	0	210	0	0	0	0	0	0	0	0	0	0	0	0	0	0	0	0	0	0	0	0	0
6002	4	2	24.1342	5	9	1	1	5	24	2.2925	1.2825	19.261	3.8855	0	0	26.7215	0	0	0	0	0	0	0	0	0	0	0	150	0	0	0	0	0	0	0	0	0	0	0	0	0	0	0	0	0	0	0	0	0
8021	4	1	18.4932	403	28	3	1	5	18	14.675	0	14.8835	6.09	0	0	35.6485	0	0	0	0	0	0	0	0	0	0	0	650	0	0	0	0	0	0	0	0	0	0	0	0	0	0	0	0	0	0	0	0	0
8022	4	1	19.7288	403	28	3	1	5	19	15.0215	0.23	0	31.8985	0.6975	0	47.8475	0	0	0	0	0	0	0	0	0	0	0	350	0	0	0	0	0	0	0	0	0	0	0	0	0	0	0	0	20	0	0	0	0
8029	4	2	19.8986	401	28	3	1	5	19	6.295	23.325	0	2.295	0.04	0	31.955	0	0	0	0	0	0	0	0	0	0	0	150	0	0	0	0	0	0	0	0	0	0	0	0	0	0	0	0	0	0	0	0	0
8038	4	2	19.8932	401	28	3	1	5	19	0.49123	0.06	0.14	24.707	0	0	25.3982	200	0	0	0	0	0	0	0	0	0	0	150	0	0	0	0	0	0	0	0	0	0	0	0	0	0	0	0	0	0	0	0	0
10005	4	1	22.537	78	28	4	1	5	22	8.88523	2.03	0.14	22.357	0	0	33.4122	0	0	0	0	0	0	0	0	0	0	0	250	0	0	0	0	0	0	0	0	0	0	0	0	40	0	0	0	0	0	0	0	0
11019	4	2	18.9671	69	47	3	1	5	18	0.2784	0	0.04068	0.6828	0.864	0	1.86588	0	0	0	0	0	0	0	0	0	150	0	0	0	0	0	0	0	0	0	0	0	0	0	0	0	0	0	0	0	0	0	0	0
11025	4	1	25.3863	69	47	3	1	5	24	13.0037	0.968	0.056	16.6039	0.139	0	30.7706	0	0	0	0	0	0	0	0	0	0	0	700	0	0	0	0	0	0	0	0	0	0	0	0	0	0	0	0	0	0	0	0	0
11051	4	1	24.7014	69	47	3	1	5	24	1.975	0.324	0.6	38.5455	0	0	41.4445	0	0	0	0	0	0	0	0	0	0	0	705	0	0	0	0	0	0	0	0	0	0	0	0	0	0	0	0	0	0	0	0	0
11094	4	1	22.5616	69	47	3	1	5	22	41.0865	0	0	4.9215	0	0.4	46.408	0	0	0	0	0	0	0	0	0	0	0	345	0	0	0	0	0	0	0	0	0	0	0	0	0	0	0	0	0	0	0	0	0
13206	4	2	25.0027	66	2	3	1	5	24	14.0798	0.306	0.077	8.068	0	0	22.5308	0	0	0	0	0	0	0	0	0	0	0	0	0	0	0	0	0	0	0	0	0	0	0	0	0	0	0	0	0	0	0	0	0
14037	4	2	24.7781	133	13	2	1	5	24	4.74	0.045	0.2	23.058	2.932	0	30.975	0	0	0	0	0	0	0	0	0	0	0	1000	0	0	0	0	0	0	0	0	0	0	0	0	0	0	0	0	0	0	0	125	0
14041	4	2	19.3753	137	13	2	1	5	19	1.244	0.153	0	22.602	0	0	23.999	0	0	0	0	0	0	0	0	0	0	0	240	0	0	0	0	70	0	0	0	0	0	0	0	0	0	0	0	0	0	0	0	0
14044	4	2	18.4192	206	13	1	1	5	18	0.928076	0.03	0.492	22.506	0	0	23.9561	0	0	0	0	0	0	0	0	0	0	0	250	0	0	0	0	0	0	0	0	0	0	0	0	0	0	0	0	40	0	0	0	0
14048	4	2	19.189	134	13	2	1	5	19	10.3325	0.03	0	22.2585	0.6975	0	33.3185	0	0	0	0	0	0	0	0	0	0	0	530	0	0	0	0	0	0	0	0	0	0	0	0	0	0	0	0	80	0	0	125	0
14050	4	2	24.2712	208	13	2	1	5	24	14.886	0.564	0	31.623	0	0	47.073	0	0	0	0	0	0	0	0	0	250	0	250	0	0	0	0	0	0	0	0	0	0	0	0	0	0	0	0	0	0	0	0	0
14052	4	2	21.1342	209	13	2	1	5	21	1.74838	0	0.112	0.1	145.197	0	147.158	0	0	0	0	0	90	0	0	0	0	0	75	0	0	0	0	0	0	0	0	0	0	0	0	0	0	0	0	0	0	0	0	0
14108	4	1	25.5534	204	13	1	1	5	24	11.8004	0.45999	0.212	32.566	0.837	0	45.8754	0	0	0	0	0	0	0	0	0	200	0	0	0	0	0	0	0	0	0	0	0	0	0	0	0	0	0	0	0	0	0	0	0
15016	4	2	20.6822	137	13	2	1	5	20	6.538	28.93	0.192	9.685	0.016	0	45.361	0	0	0	0	0	0	0	0	0	0	400	0	0	0	0	0	0	0	0	0	0	0	0	0	0	0	0	0	0	0	0	125	0
15039	4	2	18.3753	135	13	2	1	5	18	0.8815	0.12	0	18.8957	0.15375	0	20.051	0	0	0	0	0	0	0	0	0	0	0	250	0	0	0	0	0	0	0	0	0	0	0	0	0	0	0	0	30	0	0	0	0
15040	4	2	20.5973	135	13	2	1	5	20	3.34108	0.2	0.168	29.233	0	0	32.9421	225	0	0	0	0	0	0	0	0	0	250	500	0	0	0	0	0	0	0	0	0	0	0	0	0	0	0	0	0	0	0	0	0
15053	4	2	18.9534	67	13	3	1	5	18	15.29	0	0	24.166	0.93	0	40.386	0	0	0	0	0	0	0	0	0	0	0	400	0	0	0	0	0	0	0	0	0	0	0	0	0	0	0	0	10	0	0	0	0
16054	4	2	18.8658	53	6	2	1	5	18	1.649	0.024	0	24.428	0	0	26.101	0	0	0	0	0	0	0	0	0	0	0	360	0	0	0	0	0	0	0	0	0	0	0	0	0	0	0	0	0	0	0	0	0
16064	4	2	25.3616	53	6	2	1	5	24	0.15	0.009	0	0.12	0	0	0.279	0	0	0	0	0	0	0	0	0	0	200	100	0	0	0	0	0	0	0	0	0	0	0	0	0	0	0	0	0	0	0	0	0
16077	4	2	18.9233	53	6	2	1	5	18	30.7125	0.23	0	5.766	1.125	0	37.8335	0	0	0	0	0	0	0	0	0	0	0	0	0	0	0	0	0	0	0	0	0	0	0	25	0	0	0	0	0	0	0	0	0
17040	4	2	22.074	54	13	2	1	5	22	1.15169	0.0075	0.056	0.557	145.197	0	146.97	0	0	0	0	0	0	30	0	0	0	0	0	0	0	0	0	0	0	0	0	0	0	0	0	0	0	0	0	0	0	0	0	0
17092	4	2	19.6822	54	13	2	1	5	19	21.6139	0.2525	0.112	20.3565	0.675	0	43.0099	200	0	0	0	0	0	20	0	0	200	0	0	0	50	0	0	0	0	0	0	0	0	0	0	0	0	0	0	0	0	0	0	0
17094	4	2	19.9918	54	13	2	1	5	20	3.68575	0.0755	0.028	19.7408	0	0	23.53	0	0	0	0	0	0	0	0	0	0	0	200	0	0	0	0	0	0	0	0	0	0	0	0	0	0	0	0	0	0	0	0	0
20005	4	2	19.0822	82	29	4	4	5	19	1.344	0.168	0	21.287	0	0	22.799	0	0	0	0	0	0	0	0	0	200	0	0	0	0	0	0	0	0	0	0	0	0	0	0	110	0	0	0	0	0	0	0	0
20008	4	2	23.1233	82	29	4	4	5	23	18.1238	0.7469	3.546	0	0.675	0	23.0917	0	0	0	0	0	0	0	0	0	0	200	0	0	0	0	0	0	0	0	0	0	0	0	0	0	0	0	0	0	0	0	0	0
21002	4	2	23.0849	81	41	4	4	5	23	30.6227	0.5115	0.14	3.8447	1.153	0	36.2719	0	60	0	0	0	0	0	0	0	0	0	300	0	0	0	0	0	0	0	0	0	0	0	0	0	0	0	0	20	0	0	0	0
21008	4	1	18.9644	81	41	4	4	5	18	4.16904	0.03	0.084	16.216	0	0	20.499	0	35	0	0	0	0	0	0	0	0	0	200	0	0	0	0	0	0	0	0	0	0	0	0	50	0	0	0	0	0	0	0	0
21073	4	2	22.4192	41	41	1	4	5	22	1.4595	0.13	0	9.567	0	0	11.1565	0	0	0	125	0	0	0	0	0	0	200	50	0	0	0	0	0	0	0	0	0	0	0	0	0	0	0	0	0	0	0	0	0
22014	4	2	18.3836	72	23	3	4	5	18	8.48992	0.015	0.105	29.0903	0.58125	0	38.2814	0	0	0	0	0	0	0	0	0	0	0	500	0	0	0	0	0	0	0	0	0	0	0	0	0	0	0	0	0	0	0	0	0
22050	4	2	19.4575	72	23	3	4	5	19	2.375	0.0225	0	4.67	18.025	0	25.0925	0	0	0	0	0	0	0	0	0	0	0	280	0	0	0	0	0	0	0	0	0	0	0	0	0	0	0	0	0	0	0	0	0
24062	4	1	23.326	526	21	3	4	5	23	7.6988	0.306	0.16	2.4	0	0	10.5648	0	0	0	0	0	0	0	0	0	0	0	0	0	0	0	0	0	0	0	0	0	0	0	0	0	0	0	0	0	0	0	0	0
25008	4	1	23.7945	120	41	2	4	5	23	1.532	0.08	0	20.987	0	0	22.599	0	0	0	0	0	0	0	0	0	0	0	200	0	0	0	0	0	0	0	0	0	0	0	0	0	0	0	0	0	0	0	0	0
25026	4	1	22.3726	120	41	2	4	5	22	0.05	0.0225	0	0.04	0	0	0.1125	0	0	0	0	0	0	0	0	0	0	0	350	0	0	0	0	0	0	0	0	0	0	0	0	0	0	0	0	0	0	0	0	0
25035	4	2	20.0986	120	41	2	4	5	20	8.53511	0.379	0.116	28.403	0.008	0	37.4411	0	0	0	0	0	0	0	0	0	0	0	550	0	0	0	0	0	0	0	0	0	0	0	0	0	0	0	0	0	0	0	0	0
25045	4	2	22.1836	120	41	2	4	5	22	20.2724	0.7885	0.116	0.5304	0.924	0	22.6313	0	0	0	0	0	0	0	0	0	0	0	300	0	0	0	0	0	0	0	0	0	0	0	0	25	0	0	0	0	0	0	0	0
25066	4	2	24.2877	120	41	2	4	5	24	3.53	0	0.585	25.9917	13.46	0	43.5667	0	0	0	0	0	0	0	0	0	0	100	100	0	0	0	0	0	0	0	0	0	0	0	0	0	0	0	0	0	0	0	0	0
25072	4	1	21.4603	120	41	2	4	5	21	9.07054	3.214	0.084	15.51	0	0	27.8785	250	0	0	0	0	0	0	0	0	0	0	0	0	0	0	0	0	0	0	0	0	0	0	0	30	0	0	0	0	0	0	0	0
25075	4	2	23.7562	120	41	2	4	5	23	26.539	0.115	7.05	0.49	1.133	0	35.327	0	0	0	0	0	0	0	0	0	0	0	200	0	0	0	0	0	0	0	0	0	0	0	0	0	0	0	0	0	0	0	0	0
26013	4	2	19.8274	28	7	1	2	5	19	40.221	0.538	0.46	4.1006	1.454	0	46.7736	0	0	0	0	0	0	0	0	0	0	0	0	0	0	0	0	0	0	0	0	0	0	0	0	0	0	0	0	0	0	0	0	0
26019	4	2	24.7753	55	7	2	2	5	24	20.4913	0.4845	0.042	1.2586	0.024	0	22.3004	0	0	0	0	0	0	0	0	0	0	0	0	0	0	0	0	0	0	0	0	0	0	0	0	0	0	0	0	0	0	0	0	0
26024	4	1	21.3671	29	7	1	2	5	21	2.9	0.03	0	1.435	0	0	4.365	0	0	0	140	0	0	0	0	0	150	0	0	0	0	0	0	0	0	0	0	0	0	0	0	40	0	0	0	0	0	0	0	0
26032	4	2	18.3781	29	7	1	2	5	18	20.0652	0.83	0.14	21.735	0.837	0	43.6072	0	0	0	0	0	0	0	0	0	0	0	0	0	0	0	0	0	0	0	0	0	0	0	0	0	0	0	0	0	0	0	0	0
26033	4	1	22.1014	29	7	1	2	5	22	0.405	0.462	0	0.0006	0.024	0	0.8916	0	0	0	90	0	0	0	0	0	0	0	0	0	0	0	0	0	0	0	0	0	0	0	0	50	0	0	0	0	0	0	0	0
27011	4	2	23.3397	56	8	2	2	5	23	24.5625	0	0	10.748	0	0	35.3105	200	0	0	0	0	0	0	0	0	0	0	0	0	0	0	0	0	0	0	0	0	0	0	0	0	0	0	0	0	0	0	125	0
27038	4	1	24.6301	56	8	2	2	5	24	0.096269	0.045	0.042	7.356	0	0	7.53927	0	0	0	0	0	0	0	0	0	0	0	450	0	0	0	0	0	0	0	0	0	0	0	0	0	30	0	0	0	0	0	0	0
27040	4	2	19.7973	56	8	2	2	5	19	1.66577	20.7395	0.042	1.962	0	0	24.4093	0	0	0	0	0	0	0	0	0	200	0	50	0	0	0	0	0	0	0	0	0	0	0	0	0	0	0	0	0	0	0	0	0
28043	4	1	21.7945	57	8	2	2	5	21	35.1559	1.84571	0.343	0.0008	0.932	0	38.2774	0	0	0	0	0	60	0	0	0	200	0	0	0	0	0	0	0	0	0	0	0	0	0	0	0	0	0	0	40	0	0	0	0
29005	4	2	20.274	58	8	2	2	5	20	13.6975	0.042	0.182	9.335	0	0	23.2565	0	0	0	0	0	0	0	0	0	0	0	0	0	0	0	0	0	0	0	0	0	0	30	0	25	0	0	0	0	0	0	125	0
29024	4	2	18.4411	58	8	2	2	5	18	10.4185	0.175	0.14	16.3412	0.62775	0	27.7025	0	0	0	0	0	0	0	0	0	0	0	40	0	0	0	0	0	0	0	0	0	0	0	0	0	60	0	0	0	0	0	0	125
29035	4	2	22.9616	58	8	2	2	5	22	2.15388	0.2735	0.112	0.08	124.455	0	127.074	0	0	0	0	0	0	0	0	0	200	0	40	0	0	0	0	0	0	0	0	0	0	0	0	15	0	0	0	15	0	0	0	0
29036	4	1	19.7616	58	8	2	2	5	19	20.3367	0.03	0.056	0.08	0.9	0	21.4027	0	60	0	110	0	0	0	0	0	0	0	140	0	0	0	0	0	0	0	0	0	0	0	0	20	0	0	0	0	0	0	0	0
29037	4	1	20.7151	58	8	2	2	5	20	21.812	0.467	0	14.0765	0.9	0	37.2555	0	0	0	0	0	0	0	0	0	0	0	200	0	0	0	0	0	0	0	0	0	0	0	0	60	0	0	0	0	0	0	0	0
30021	4	1	22.8192	21	43	1	2	5	22	10.9925	0.306	0	18.1525	0.6975	0	30.1485	0	0	0	0	0	0	0	0	0	0	0	200	0	0	0	0	0	0	0	0	0	0	0	0	0	0	0	0	0	0	0	125	0
30038	4	1	23.3973	23	43	1	2	5	23	11.5187	5.141	0.14	4.7061	0.072	0	21.5778	0	0	0	0	0	0	50	0	0	0	0	0	0	0	0	0	0	0	60	0	0	0	0	0	0	0	0	0	0	0	0	0	0
30050	4	2	20.737	23	43	1	2	5	20	4.88962	24.471	0.07	1.7413	0.052	0	31.2239	0	0	0	0	0	0	0	0	0	0	0	200	0	0	0	0	0	0	0	0	0	0	0	0	0	0	0	0	0	0	0	0	0
30055	4	2	18	23	43	1	2	5	18	2.3985	0.54	35.02	5.3915	0	0	43.35	0	0	0	0	0	0	0	0	0	0	0	200	0	0	0	0	0	0	0	0	0	0	0	0	0	0	0	0	0	0	0	0	0
30094	4	2	19.4384	25	43	1	2	5	19	33.8504	0.9595	0.112	0.002	1.43	0	36.3539	0	0	0	0	0	0	0	0	0	0	0	0	0	0	0	0	0	0	0	0	0	0	0	0	0	0	0	0	0	0	0	0	0
31033	4	2	19.2356	86	8	2	2	5	19	28.6213	0.0195	14.9255	1.705	1.35	0	46.6213	0	0	0	0	0	0	0	0	0	0	0	0	0	0	0	0	0	0	0	0	0	0	0	0	80	0	0	0	0	0	0	0	0
33026	4	2	21.4932	79	8	4	2	5	21	7.16054	1.496	14.184	0	0	0	22.8405	0	0	0	0	0	0	0	0	0	0	0	210	0	0	0	0	0	0	0	60	0	0	0	0	30	0	0	0	0	0	0	0	0
33072	4	2	18.1205	79	8	4	2	5	18	43.7368	0.7305	0.224	0.04	0	0	44.7313	0	0	0	0	0	0	0	0	0	0	100	0	0	0	0	0	0	0	0	0	0	0	0	0	30	0	0	0	20	0	0	0	0
33074	4	2	19.0493	79	8	4	2	5	19	28.1615	0.39	1.008	0	0	0	29.5595	0	0	0	0	0	0	0	0	0	0	0	0	0	0	0	0	0	0	0	0	0	0	0	0	0	0	0	0	0	0	0	0	0
33096	4	1	19.1288	79	8	4	2	5	19	6.94269	0.153	0.238	13.9965	0	0	21.3302	0	0	0	140	0	0	0	0	0	0	0	100	0	0	0	0	0	0	0	0	0	0	0	0	0	0	0	0	0	0	0	0	0
33102	4	1	23.4795	79	8	4	2	5	23	14.5044	0.03	0	23.7252	0	0	38.2596	0	0	0	200	0	0	0	0	0	0	0	200	0	0	0	0	0	0	0	0	0	0	0	0	0	0	0	0	0	0	0	0	0
33130	4	2	20.4932	79	8	4	2	5	20	17.5112	0.6895	0.14	9.934	0	0	28.2747	0	0	0	0	0	0	0	0	0	0	0	100	0	0	0	0	0	0	0	0	0	0	0	0	0	50	0	0	0	0	0	0	0
33161	4	2	19.2082	79	8	4	2	5	19	8.98948	0.03	0.14	25.6322	0.62775	0	35.4195	0	0	0	0	0	0	0	0	0	0	0	200	0	0	0	0	0	0	0	0	0	0	0	0	0	0	0	0	0	0	0	0	0
34006	4	2	23.2	80	50	4	2	5	23	3.3311	0.1605	21.322	20.4564	0.024	0	45.294	0	0	0	0	0	0	0	0	0	0	0	425	0	200	0	0	0	0	0	0	0	0	0	0	0	0	0	0	0	0	0	0	0
34014	4	2	22.2247	80	50	4	2	5	22	0.1	0	0	0.08	0	0	0.18	0	0	0	0	0	0	0	0	0	0	0	40	0	0	0	0	0	0	0	0	0	0	0	0	0	0	0	0	30	0	0	0	0
34022	4	2	21.0904	80	50	4	2	5	21	17.535	0.057	10.506	7.6675	0.9075	0	36.673	0	0	0	0	0	0	0	0	0	150	0	225	0	0	0	0	0	0	0	0	0	0	0	0	0	0	0	0	20	0	0	125	0
34033	4	2	21.0219	80	50	4	2	5	21	7.72558	0.4525	21.124	7.5606	0	0	36.8627	0	0	0	0	0	0	0	0	0	200	0	165	0	0	0	0	0	0	0	0	0	0	0	0	0	0	0	0	0	0	0	0	0
34045	4	2	22.674	80	50	4	2	5	22	14.392	0.4486	0.21	7.1816	0.0369	0	22.2691	0	0	0	0	0	0	0	0	0	400	0	280	0	0	0	0	0	0	0	0	0	0	0	0	0	0	0	0	0	0	0	0	0
35062	4	2	19.5507	79	8	4	2	5	19	0	0.0225	0	23.064	0	0	23.0865	0	0	0	0	0	0	0	0	0	0	0	150	0	0	0	0	0	0	0	0	0	0	0	20	0	0	0	0	0	0	0	0	0
38073	4	2	19.0849	64	12	2	5	5	19	0.030846	0	0.028	0	0	0	0.058846	0	0	0	0	0	0	0	0	0	0	0	0	0	0	0	0	0	0	0	0	0	0	0	0	0	0	0	0	0	0	0	0	0
38075	4	2	18.6329	64	12	2	5	5	18	12.318	0.2775	0	32.109	0.6975	0	45.402	200	0	0	0	0	0	0	0	0	0	0	250	0	0	0	0	0	0	0	0	0	0	0	0	0	0	0	0	0	0	0	0	0
38085	4	2	19.8055	108	12	1	5	5	19	11.3127	0.16	0.14	18.1125	0.6975	0	30.4227	0	0	0	0	0	0	0	0	0	0	0	0	0	0	0	0	0	0	0	0	0	0	0	0	0	100	0	0	0	0	0	0	0
38088	4	2	20.3589	64	12	2	5	5	20	1.5	0.0225	0	0	0	0	1.5225	0	0	0	0	0	0	0	0	0	200	0	0	0	0	0	0	0	0	0	0	0	0	0	0	0	25	0	0	0	0	0	0	0
38103	4	2	25.474	45	12	1	5	5	24	18.6171	3.2465	0.098	0	0.45	0	22.4116	0	0	0	150	0	0	0	0	0	0	0	25	0	75	0	0	0	0	0	0	0	0	0	0	0	0	0	0	0	0	0	0	0
38118	4	1	18.8247	108	12	1	5	5	18	17.4988	0.794	0.028	24.41	0.6975	0	43.4283	0	0	0	0	0	0	0	0	0	0	0	200	0	0	0	0	0	0	0	0	0	0	0	0	0	0	0	0	25	0	0	125	0
38168	4	1	22.874	114	17	3	2	5	22	1.875	0	0	0	0	0.285	2.16	0	0	0	0	0	300	0	0	0	0	0	0	0	0	0	0	0	0	0	0	0	0	0	0	0	0	0	0	0	0	0	0	0
39002	4	1	21.7068	85	35	4	6	5	21	1.97663	0.06	0.021	4.68875	36.505	0	43.2514	0	0	0	0	0	0	0	0	0	0	0	625	0	0	0	0	0	0	0	0	0	0	0	160	0	0	0	0	0	0	0	0	0
39012	4	1	21.8027	85	35	4	6	5	21	12.05	0	0	0.04	0	0	12.09	0	0	0	0	0	0	0	0	0	0	0	350	0	0	0	0	0	0	0	0	0	0	0	0	0	0	0	0	0	0	0	0	0
39045	4	1	19.2521	85	35	4	6	5	19	3.29663	0.4705	0.203	1.451	0	0	5.42113	0	0	0	0	0	0	30	0	0	0	200	0	0	0	0	0	0	0	0	0	0	0	0	0	0	0	0	0	0	0	0	0	0
39048	4	2	18	85	35	4	6	5	18	17.15	0.57	0	0	0	0	17.72	0	0	0	0	0	0	0	0	0	0	0	200	0	0	0	0	0	0	0	0	0	0	0	0	0	0	0	0	20	0	0	0	0
39068	4	2	18.4849	52	35	1	6	5	18	3.1	0	0	19.3	0	0	22.4	0	0	0	0	0	0	0	0	0	0	300	0	0	0	0	0	0	0	0	0	0	0	0	0	0	0	0	0	0	0	0	0	0
39082	4	1	20.5726	85	35	4	6	5	20	3.674	0	0	18.662	0	0	22.336	0	0	0	0	0	0	0	0	0	0	0	400	0	0	0	0	0	0	0	0	0	0	0	30	0	0	0	0	0	0	0	0	0
41015	4	2	21.7781	81	41	4	4	5	21	13.32	0.459	8.755	5.808	0	0	28.342	0	0	0	0	0	0	0	0	0	200	0	0	0	0	0	0	0	0	0	0	0	0	0	0	0	0	0	0	0	0	0	0	0
81118	4	2	18.3671	534	28	2	1	5	18	15.762	0.306	0	6.56	0	0	22.628	0	0	0	0	0	0	0	0	0	0	200	200	0	0	0	0	0	0	0	0	0	0	0	0	0	0	0	0	0	0	0	0	0
81119	4	1	22.8384	419	28	3	1	5	22	0.2775	0.9525	26.4375	0	0	0	27.6675	0	0	0	0	0	0	0	0	0	0	0	0	0	0	0	0	0	0	0	0	0	0	0	0	0	0	0	0	0	0	0	0	0
81202	4	2	22.0356	78	28	4	1	5	22	0.2553	0.3975	0	3.9442	0.008	0	4.605	0	0	0	0	0	0	0	0	0	400	0	25	0	0	0	0	0	0	0	0	0	0	0	0	0	0	0	0	0	0	0	0	0
81221	4	1	22.5425	78	28	4	1	5	22	3.111	0.459	0	27.993	0	0	31.563	0	0	0	0	0	0	0	0	0	0	0	450	0	0	0	0	0	0	0	0	0	0	0	0	0	0	0	0	0	0	0	0	0
81223	4	2	24.4329	78	28	4	1	5	24	2.41748	0.095	0.049	14.1965	0	22.525	39.283	0	0	0	0	0	0	0	0	0	375	0	0	0	0	0	125	0	0	0	0	0	0	0	0	0	0	0	0	40	0	0	0	0
81313	4	2	20.7041	78	28	4	1	5	20	8.144	0.808	0	0.024	0	0	8.976	0	0	0	0	0	0	0	0	0	225	0	0	0	0	0	0	0	0	0	0	0	0	0	0	0	0	0	0	0	0	0	0	0
81317	4	2	18.1973	78	28	4	1	5	18	4.922	1.1875	0	20.7635	0.1845	0	27.0575	0	0	0	0	0	0	0	0	0	0	0	400	0	0	0	0	0	0	0	0	0	0	0	0	0	0	0	0	0	0	0	0	0
81408	4	2	23.9836	78	28	4	1	5	23	26.6178	0.24	0.21	0	1.125	0	28.1928	0	0	0	0	0	0	0	0	0	0	0	500	0	0	0	0	0	0	0	0	0	0	0	0	0	0	0	0	0	0	0	0	0
81410	4	2	20.0164	78	28	4	1	5	20	26.6178	0.24	0.21	0	1.125	0	28.1928	0	0	0	0	0	0	0	0	0	0	0	500	0	0	0	0	0	0	0	0	0	0	0	0	0	0	0	0	0	0	0	0	0
81417	4	2	21.3863	78	28	4	1	5	21	34.75	0.0225	0	0	0	0	34.7725	0	0	0	0	0	0	0	0	0	250	0	0	0	0	0	0	0	0	0	0	0	0	0	0	0	30	0	0	0	0	0	0	0
81423	4	2	20.9096	78	28	4	1	5	20	22.5077	0.8465	0.14	0.0003	0.912	0	24.4065	0	0	0	0	0	0	0	0	0	0	0	450	0	0	0	0	0	0	0	0	0	0	0	0	0	0	0	0	0	0	0	0	0
81501	4	2	21.4055	78	28	4	1	5	21	13.455	0	0	10.915	0	0	24.37	0	0	0	0	0	0	0	0	0	400	0	0	0	0	0	0	0	0	0	0	0	0	0	15	0	0	0	0	0	0	0	0	0
81504	4	1	21.6466	78	28	4	1	5	21	24.9752	0.391	17.65	2.846	0.9	0	46.7622	0	0	0	0	0	0	0	0	0	0	0	400	0	0	0	0	0	0	0	0	0	0	0	0	0	0	0	0	0	0	0	0	0
81521	4	2	19.7507	78	28	4	1	5	19	22.8077	0.5405	0.14	0.0003	0.912	0	24.4005	0	0	0	0	0	0	0	0	0	0	0	450	0	0	0	0	0	0	0	0	0	0	0	0	0	0	0	0	0	0	0	0	0
85018	4	2	19.8932	119	29	3	4	5	19	3.388	2.34	0	18.028	0	0	23.756	0	0	0	0	0	0	0	0	0	0	0	100	0	0	0	0	0	0	0	0	0	0	0	0	0	0	0	0	0	0	0	0	0
85019	4	2	19.5507	119	29	3	4	5	19	3.386	0	0	21.092	0	0	24.478	0	0	0	0	0	0	0	0	0	0	0	200	0	0	0	0	0	0	0	0	0	0	0	0	0	0	0	0	0	0	0	125	0
87019	4	2	18.5863	230	30	3	5	5	18	14.212	0.015	0	17.4735	0	0	31.7005	0	0	0	0	0	0	0	0	0	0	200	0	0	0	0	0	0	0	0	0	0	0	0	0	0	0	0	0	0	0	0	0	0
87020	4	2	18.6	230	30	3	5	5	18	14.2245	0.03	0.098	25.5225	0.369	0	40.244	0	0	0	0	0	0	0	0	0	0	0	280	0	0	0	0	0	0	0	0	0	0	0	0	0	60	0	0	20	0	0	0	0
87029	4	2	18.4301	221	30	1	5	5	18	0.077	46.8565	0	0.0007	0.028	0	46.9622	0	0	0	0	0	0	0	0	0	0	0	200	0	0	0	0	0	0	0	0	0	0	0	0	0	0	0	0	0	0	0	0	0
87038	4	1	20.0247	221	30	1	5	5	20	9.25357	2.66	0.35	13.376	0	0	25.6396	0	0	0	0	0	0	0	0	0	0	0	400	0	0	0	0	0	0	0	0	0	0	0	0	50	0	0	0	0	0	0	0	0
87044	4	1	19.589	230	30	3	5	5	19	24.121	0.03	0.28	0	1.125	0	25.556	0	0	0	0	0	0	0	0	0	0	0	0	0	0	0	0	0	0	0	0	0	0	0	0	0	0	0	0	30	0	0	0	0
88002	4	1	24.0411	84	46	4	5	5	24	44.9	0.048	0	2.46	0	0	47.408	0	0	0	0	0	0	0	0	0	0	0	100	0	0	0	0	0	0	0	0	0	0	40	0	0	0	0	0	0	0	0	250	0
88003	4	2	20.526	128	46	2	5	5	20	2.38292	0.06	0.014	18.662	0	0	21.1189	0	0	0	0	0	0	0	0	0	0	0	200	0	0	0	0	0	0	0	0	0	0	0	0	0	0	20	0	0	0	0	125	0
88030	4	1	24.8164	84	46	4	5	5	24	2.25	0	0	21.142	0	0	23.392	0	0	0	0	0	0	0	0	0	0	0	0	0	0	0	0	0	0	0	0	0	0	0	40	0	0	0	0	0	0	0	0	0
88055	4	2	24.2466	84	46	4	5	5	24	0	0	0	0	0	0	0	0	0	0	0	0	0	0	0	0	0	0	0	0	0	0	0	0	0	0	0	0	0	0	0	0	0	0	0	20	0	0	0	0
88068	4	2	22.7589	84	46	4	5	5	22	0	0	0	0	0	0	0	0	0	0	0	0	0	0	0	0	0	0	0	0	0	0	0	0	0	120	0	0	0	0	0	0	0	0	0	0	0	0	125	0
2073	4	1	18.8466	62	33	2	3	5	18	6.374	0.03	0	18.662	0	0	25.066	0	0	0	200	0	0	0	0	0	0	0	400	0	0	0	0	0	0	0	0	0	0	0	0	0	0	0	0	0	0	0	0	0
2094	4	2	20.5123	62	33	2	3	5	20	14.7363	0.215	0	21.1913	0.81375	0	36.9562	0	0	0	0	0	0	0	0	0	400	0	100	0	0	0	0	0	0	0	0	0	0	0	0	0	0	0	0	0	0	0	0	0
2096	4	2	21.3178	62	33	2	3	5	21	1.467	0.135	0	0.08	103.713	0	105.394	0	0	0	0	0	0	0	0	0	300	0	0	0	0	0	0	0	0	0	0	0	0	0	0	0	0	0	0	0	0	0	0	0
2106	4	2	20.1507	62	33	2	3	5	20	4.069	0.155	0	18.662	82.97	0	105.856	0	0	0	125	0	0	0	0	0	0	0	200	0	0	0	0	0	0	0	0	0	0	0	0	0	0	0	0	0	0	0	0	0
2112	4	2	19.737	62	33	2	3	5	19	13.344	0.57	0	27.332	0.93	0	42.176	0	0	0	0	0	0	0	0	0	0	0	300	0	0	0	0	0	0	0	0	0	0	0	0	0	0	0	0	0	0	0	125	0
2113	4	2	20.8986	500	33	3	3	5	20	27.3671	0.485	0.07	1.89	1.125	0	30.9371	0	0	0	0	0	0	0	0	0	0	150	0	0	0	0	0	0	0	0	0	0	0	0	0	0	0	0	0	0	0	0	0	0
3030	4	1	22.4767	44	39	1	3	5	22	34.6445	0.0975	0	4.7375	0	0.3	39.7795	0	0	0	0	0	0	0	0	0	0	0	250	0	0	0	0	0	0	0	0	0	0	0	0	0	0	0	0	0	0	0	0	0
3062	4	2	20.0219	44	39	1	3	5	20	23.6747	0	0	19.7593	1.25625	0	44.6902	0	0	0	0	0	0	0	0	0	0	0	250	0	0	0	0	0	0	0	0	0	0	0	0	0	0	0	0	0	0	0	0	0
3118	4	1	20.7233	73	39	3	3	5	20	37.3905	0	0	4.7495	0	0.35	42.49	0	0	0	0	0	0	0	0	0	0	300	0	0	0	0	0	0	0	0	0	0	0	0	0	0	0	0	0	0	0	0	0	0
3123	4	2	22.2411	73	39	3	3	5	22	3.62954	0.2025	0.084	0	0	0	3.91604	0	0	0	0	0	0	0	0	0	0	0	0	0	0	0	0	0	0	0	0	0	0	0	0	0	0	0	0	0	0	0	0	0
3158	4	2	22.6466	44	39	1	3	5	22	15.5543	0.1775	26.391	0	0	0	42.1228	0	0	0	0	0	0	0	0	0	0	0	250	0	0	0	0	0	0	0	0	0	0	0	0	0	0	0	0	0	0	0	0	0
5076	4	1	18.0027	83	48	4	3	5	18	10.0431	0.0225	0	20.1013	0.1845	0	30.3514	0	0	0	0	0	0	0	0	0	0	0	200	0	0	0	0	0	0	0	0	0	0	0	0	0	0	0	0	0	0	0	125	0
5107	4	2	24.789	83	48	4	3	5	24	21.7843	0.2915	0.21	4.84	0.45	0	27.5758	0	0	0	0	0	0	0	0	0	0	0	0	0	0	0	0	0	0	0	0	0	0	0	0	0	0	0	0	0	0	0	0	125
5131	4	2	23.1671	83	48	4	3	5	23	10.723	0.671	0	18.849	33.311	0	63.554	0	0	0	0	0	0	0	0	0	0	0	800	0	0	0	0	0	0	0	0	0	0	0	0	0	0	0	0	0	0	0	0	0
5132	4	2	19.8795	83	48	4	3	5	19	14.3736	0.846	0.21	28.7523	0.72075	0	44.9026	0	0	0	380	0	0	0	0	0	27	0	365	0	0	0	0	0	0	0	0	0	0	0	0	0	0	0	0	0	0	0	0	0
5133	4	2	23.1425	83	48	4	3	5	23	31.4858	0.3744	0.0924	0.188	1.35	0	33.4906	0	0	0	0	0	0	0	0	0	0	0	280	0	0	0	0	0	0	0	0	0	0	0	0	0	0	0	0	0	0	0	125	0
5245	4	2	22.0137	515	20	2	3	5	22	13.8245	1.08	0.113	29.1735	3.0975	0	47.2885	0	0	0	0	0	0	0	0	0	0	0	330	0	0	0	0	0	0	0	0	0	0	0	0	0	0	0	0	0	0	0	0	0
5247	4	2	21.8521	514	20	3	3	5	21	30.8454	0.20022	0.192	1.2	1.35	0	33.7876	0	0	0	0	0	0	0	0	0	200	0	0	0	0	0	0	0	0	0	0	0	0	0	0	0	0	0	0	0	0	0	0	0
5279	4	1	23.8986	511	20	2	3	5	23	6.2445	1.0455	0	14.1165	0	0	21.4065	0	0	0	0	0	0	0	0	0	0	0	250	0	0	0	0	0	0	0	0	0	0	0	0	0	0	0	0	60	0	0	0	0
5335	4	2	19.8411	510	20	3	3	5	19	18.8583	0.135	0.21	12.091	0.915	0	32.2093	0	0	0	0	0	0	0	0	0	150	0	0	0	0	0	0	0	0	0	0	0	0	0	20	0	0	0	0	0	0	0	125	0
5337	4	2	18.8932	510	20	3	3	5	18	0.022	0.056	0	0.0002	0.008	22.525	22.6112	0	40	0	0	0	0	0	0	0	0	0	0	0	0	0	125	0	0	0	0	0	0	0	0	0	0	0	0	0	0	0	0	0
5351	4	2	20.9479	510	20	3	3	5	20	10.0125	0.015	0.42	18.2325	0.6975	0	29.3775	0	0	0	0	0	0	0	0	0	0	150	90	0	0	0	0	0	0	0	0	0	0	0	0	0	0	0	0	20	0	0	0	0
5375	4	1	18.2575	510	20	3	3	5	18	3.03669	0.3	0.42	0	82.97	0	86.7267	0	0	0	0	0	0	0	0	0	0	0	150	0	0	0	0	0	0	0	0	0	0	0	0	0	0	0	0	120	0	0	125	0
5911	4	2	20.2849	83	48	4	3	5	20	11.85	0.459	0	4.84	0	0	17.149	0	0	0	0	0	0	0	0	0	0	0	0	0	0	0	0	0	0	0	0	0	0	0	0	0	0	0	0	0	0	0	0	0
6027	4	2	20.7315	100	48	1	3	5	20	1.14487	0.045	29.869	2.2966	0	0	33.3555	0	0	0	0	0	0	0	0	0	0	200	100	0	0	0	0	0	0	0	0	0	0	0	0	0	0	0	0	50	0	0	0	0
7024	4	2	20.2795	75	1	3	3	5	20	0.213	0.1566	29.767	3.924	0	0	34.0606	0	0	0	0	0	0	0	0	0	125	0	0	0	0	0	0	0	0	0	0	0	0	0	0	0	0	0	0	0	0	0	0	0
8046	4	2	23.5233	403	28	3	1	5	23	29.2945	0.045	0.28	1.5125	1.35	0	32.482	0	0	0	0	0	0	0	0	0	150	0	0	0	0	0	0	0	0	0	0	0	0	0	0	0	0	0	0	0	0	0	0	0
11081	4	1	24.1288	69	47	3	1	5	24	20.134	0.015	0	0.168	0	0.542	20.859	0	0	0	0	0	0	0	0	0	500	0	100	0	0	0	0	0	0	0	0	0	0	0	0	0	0	0	0	0	0	0	0	0
11087	4	1	20.3288	69	47	3	1	5	20	0.05	0.0525	0	1.5125	145.197	0	146.812	200	0	0	0	0	0	0	0	0	200	0	0	0	0	0	0	0	0	0	0	0	0	0	0	0	0	0	0	0	0	0	0	0
11106	4	1	22.0137	69	47	3	1	5	22	2.4445	1.732	0	18.1725	0	0	22.349	0	0	0	0	0	0	0	0	0	0	0	300	0	0	0	0	0	0	0	0	0	0	0	0	0	0	0	0	0	0	0	125	0
13202	4	2	24.3671	66	2	3	1	5	24	0.123384	0.306	0.112	38.44	0	0	38.9814	0	0	0	0	0	0	0	0	0	0	0	0	0	0	0	0	0	0	0	0	0	0	0	0	0	0	0	0	0	0	0	0	0
13210	4	2	21.0411	101	2	1	1	5	21	19.249	0.015	0	18.702	0	0	37.966	0	0	0	0	0	0	0	0	0	500	0	0	0	0	0	0	0	0	0	0	0	0	0	0	0	0	0	0	0	0	0	0	0
14036	4	2	24.0548	133	13	2	1	5	24	5.2525	0.6885	0.023	24.31	0.004	0	30.278	200	0	0	0	0	0	0	0	0	0	500	155	0	0	0	0	0	0	0	0	0	0	0	0	0	0	0	0	20	0	0	0	0
14047	4	2	23.4904	67	13	3	1	5	23	14.598	0.06	15.759	6.35	0	0	36.767	0	0	0	0	0	0	0	0	0	0	0	375	0	0	0	0	0	0	0	0	0	0	0	0	0	0	0	0	0	0	0	125	0
14051	4	2	19.5836	54	13	2	1	5	19	11.4686	0.374	0.084	12.3168	0	0	24.2434	0	0	0	0	0	0	0	0	0	0	0	600	0	0	0	0	0	0	0	0	0	0	0	0	0	20	0	0	0	0	0	0	0
14053	4	2	19.8411	203	13	1	1	5	19	7.79438	0.018	0.212	29.493	0	0	37.5174	0	0	0	0	0	0	0	0	0	0	0	200	0	0	0	0	0	0	0	0	0	0	0	0	0	0	0	0	0	0	0	0	0
14096	4	1	18.1836	67	13	3	1	5	18	20.321	0.015	0	9.379	0	0.2	29.915	0	225	0	0	0	0	0	0	0	0	0	450	0	0	0	0	0	0	0	0	0	0	0	0	0	15	0	0	0	0	0	0	0
14103	4	1	21.9671	135	13	2	1	5	21	20.4957	0.11	0.42	5.866	0.9	0	27.7917	0	0	0	0	0	0	0	0	0	0	0	125	0	0	0	0	0	0	0	0	0	0	0	0	0	0	0	0	0	0	0	0	0
14107	4	1	20.0603	203	13	1	1	5	20	4.08646	2.235	0.28	37.364	0.09	0	44.0555	0	0	0	0	0	0	0	0	0	0	0	400	0	0	0	0	0	0	0	0	0	0	0	0	0	0	0	0	0	0	0	0	0
14110	4	1	22.4082	206	13	1	1	5	22	2.64279	1.466	0.225	10.181	0	0	14.5148	0	0	0	0	0	0	0	0	0	0	0	375	0	0	0	0	0	0	0	0	0	0	0	0	0	0	0	0	0	0	70	0	0
15049	4	2	18.4986	67	13	3	1	5	18	5.71688	2.7875	0.112	27.9555	0	0	36.5719	0	0	0	0	0	0	0	0	0	0	0	125	0	0	0	0	0	0	0	0	0	0	0	0	0	0	0	0	0	0	0	125	0
15054	4	2	22.0959	137	13	2	1	5	22	12.4962	2.0671	0.14	16.9405	0.0615	0	31.7053	0	0	0	0	0	0	0	0	200	0	0	0	0	0	0	0	0	0	0	0	0	0	0	0	50	0	0	0	0	0	0	0	0
16001	4	2	24.4959	53	6	2	1	5	24	0.111692	0.015	0.056	1.9775	145.197	0	147.358	0	0	0	0	0	0	0	0	0	0	0	100	0	0	0	0	0	0	0	0	0	0	0	0	0	100	0	0	0	0	0	0	0
16052	4	1	18.7123	53	6	2	1	5	18	0.05	0.021	0	26.421	0	0	26.492	0	0	0	0	0	0	0	0	0	0	0	180	0	0	0	0	0	0	0	0	0	0	0	0	0	0	0	0	0	0	30	0	0
17058	4	2	23.7452	54	13	2	1	5	23	0.319876	0	19.429	3.7324	0	0	23.4813	0	0	0	0	0	0	0	0	0	0	0	200	0	0	0	0	0	0	0	0	0	0	0	0	0	0	0	0	0	0	0	0	0
17102	4	2	22.6082	54	13	2	1	5	22	1.38295	0.124	9.8535	14.2182	0	0	25.5786	0	0	0	140	0	0	0	0	0	0	0	250	0	50	0	0	0	0	0	0	0	0	0	0	0	0	0	0	18	0	0	0	0
20013	4	2	22.3753	141	29	2	4	5	22	14.5755	0.912	0.072	16.1595	0	0	31.719	0	0	0	0	0	0	0	0	0	0	200	0	0	0	0	0	0	0	0	0	0	0	0	0	0	0	0	0	0	0	0	0	0
21012	4	2	20.9562	138	41	1	4	5	20	30.3086	0.04555	0.434	0.04	0	0	30.8282	0	0	0	0	0	0	0	0	0	0	0	150	0	0	0	0	0	0	0	0	0	0	0	0	0	0	0	0	0	0	0	0	0
21023	4	2	21.5233	81	41	4	4	5	21	8.88	0.015	29.767	4.805	0	0	43.467	0	0	0	0	0	0	0	0	0	0	0	200	0	0	0	0	0	0	60	0	0	0	0	0	0	0	0	0	0	0	0	0	0
21024	4	2	21.5726	81	41	4	4	5	21	11.8532	1.153	0.14	7.225	0	0	20.3712	0	0	0	0	0	0	0	0	0	0	0	120	0	0	0	0	0	0	0	0	0	0	0	0	0	0	0	0	20	0	0	0	0
21038	4	1	20.4849	81	41	4	4	5	20	14.6457	0.153	0	24.1988	0.86025	0	39.8578	0	0	0	0	0	0	0	0	0	0	0	300	0	0	0	0	0	0	0	0	0	0	0	0	0	0	0	0	0	0	0	0	0
21060	4	1	19.5479	138	41	1	4	5	19	10.6418	0.168	0	21.0467	0.62775	0	32.4843	0	0	0	0	0	0	0	0	0	0	0	200	0	0	0	0	0	0	0	0	0	0	0	0	0	0	0	0	0	0	0	0	0
21077	4	1	19.737	81	41	4	4	5	19	2.44727	1.38	0.042	0.49	0	0	4.35927	0	0	0	125	0	0	0	0	0	0	0	0	0	0	0	0	0	0	0	0	0	0	0	0	0	0	0	0	0	0	0	0	0
21088	4	2	24.5973	411	11	3	4	5	24	1.4595	0.13	0	9.371	0	0	10.9605	0	0	0	125	0	0	0	0	0	0	200	50	0	0	0	0	0	0	0	0	0	0	0	0	0	0	0	0	0	0	0	0	0
22020	4	2	19.3699	72	23	3	4	5	19	2.155	0	0	6.274	25.235	0	33.664	0	0	0	0	0	0	0	0	0	0	0	250	0	0	0	0	0	0	0	0	0	0	0	0	0	0	0	0	0	0	0	0	0
22023	4	1	20.0329	72	23	3	4	5	20	15.1497	0.09	0.056	0.116	0	0.15	15.5617	0	0	0	0	0	0	0	0	0	0	0	250	0	0	0	0	0	0	0	0	0	0	40	0	0	0	0	0	0	0	0	0	0
22035	4	2	18.0904	72	23	3	4	5	18	30.2705	0.3675	7.284	1.371	0.04	0.25	39.583	0	0	0	0	0	0	0	0	0	0	0	20	0	0	0	0	0	0	0	0	0	0	0	0	0	0	0	0	0	0	0	0	0
22039	4	2	20.8301	72	23	3	4	5	20	13.538	0.431	0.25	12.165	0.372	0	26.756	0	0	0	0	0	0	0	0	0	0	30	0	0	0	0	0	0	0	0	0	0	0	50	0	0	0	0	0	0	0	0	0	0
22045	4	1	21.5699	72	23	3	4	5	21	24.6607	0.045	0.056	0.116	0	0	24.8777	0	0	0	0	0	0	0	0	0	0	0	750	0	0	0	0	0	0	0	0	0	0	0	0	0	0	0	60	0	0	0	0	0
22059	4	2	23.9753	72	23	3	4	5	23	0.6	0.03	38.522	0	0	0	39.152	0	0	0	0	0	0	0	0	0	0	0	0	0	0	0	0	0	0	0	0	0	0	30	0	40	0	0	0	0	0	0	0	0
22062	4	1	21.7753	72	23	3	4	5	21	21.449	0.03044	0	0.116	0.9	0	22.4954	0	0	0	125	0	0	0	0	0	0	0	750	0	0	0	0	0	0	0	0	0	0	0	0	0	0	0	0	0	0	0	0	0
22063	4	2	23.9342	72	23	3	4	5	23	5.037	0.15	0	1.9375	0	0	7.1245	0	0	0	125	0	0	0	0	0	0	0	0	0	0	0	0	0	0	0	0	0	0	0	0	0	0	0	0	0	0	0	0	0
22080	4	1	22.189	104	4	1	4	5	22	6.345	0	0.1	13.615	0.465	0	20.525	0	0	0	0	0	0	0	0	0	0	0	800	0	0	0	0	0	0	0	0	0	0	0	0	70	0	0	0	0	0	0	0	0
22086	4	2	23.9315	105	4	2	4	5	23	4.628	2.7	8.755	14.479	0	0	30.562	0	0	0	0	0	0	0	0	0	290	0	0	0	0	0	0	0	0	0	0	0	0	0	0	0	60	0	0	0	0	0	0	0
24061	4	2	21.9726	411	11	3	4	5	21	5.95546	0.0765	0.36	19.8623	0.012	0	26.2663	0	0	0	0	0	0	0	0	0	0	0	0	0	0	0	0	0	0	0	0	0	0	0	0	0	0	0	0	0	0	0	0	0
25005	4	2	24.8274	120	41	2	4	5	24	13.4198	0.4845	0.084	9.331	0	0	23.3193	0	0	0	0	0	0	0	0	0	0	0	300	0	0	0	0	0	0	0	0	0	0	0	0	0	0	0	0	0	0	0	0	0
25016	4	2	24.4384	120	41	2	4	5	24	26.8398	0.555	0.023	14.281	2.9615	0	44.6603	0	0	0	0	0	0	0	0	0	0	0	300	0	0	0	0	0	0	0	0	0	0	0	0	0	0	0	0	0	0	0	0	0
25027	4	2	18.5699	120	41	2	4	5	18	0.437	0	0	9.411	0	0	9.848	0	0	0	0	0	0	0	0	0	0	0	300	0	0	0	0	0	0	0	0	0	0	0	0	0	0	0	0	0	0	0	0	0
25046	4	2	21.0438	120	41	2	4	5	21	1.887	0.015	0	9.371	0	0	11.273	0	0	0	0	0	0	0	0	0	0	0	300	0	0	0	0	0	0	0	0	0	0	0	0	25	0	0	0	0	0	0	0	0
26020	4	2	23.8137	55	7	2	2	5	23	0.293	0.123	40.338	0.0406	0.024	0	40.8186	0	0	0	0	0	0	0	0	0	40	0	0	0	0	0	0	0	0	0	0	0	0	0	0	0	0	0	0	0	0	0	0	0
26026	4	1	21.6932	29	7	1	2	5	21	15.9868	0.142	0.126	16.4494	0.574	0	33.2782	0	0	0	0	0	0	0	0	0	0	0	0	0	0	0	0	0	0	0	0	0	0	0	0	0	0	0	0	0	0	0	250	0
27021	4	2	18.0055	56	8	2	2	5	18	9.562	2.8044	14.8835	16.298	0	0	43.5479	0	0	0	0	0	0	0	0	0	0	0	200	0	0	0	0	0	0	0	0	0	0	0	0	0	0	0	0	0	0	0	0	0
27052	4	1	23.6493	56	8	2	2	5	23	2.272	0.1905	0	42.184	0	0	44.6465	0	0	0	0	0	0	0	0	0	0	0	400	0	0	0	0	0	0	0	0	0	0	0	10	0	0	0	0	0	0	0	0	0
28007	4	2	20.5014	57	8	2	2	5	20	1.424	0.0075	0	19.187	0	0	20.6185	0	0	0	0	0	0	0	0	0	0	0	200	0	0	0	0	0	0	0	0	0	0	0	0	0	0	0	0	0	0	0	0	0
28011	4	2	22.0493	57	8	2	2	5	22	31.9909	0.6735	0.112	0.585	1.35	0	34.7114	0	0	0	0	0	0	0	0	0	125	0	0	0	0	0	0	0	0	0	0	0	0	0	0	0	0	0	0	0	0	0	0	0
28012	4	2	20.1918	57	8	2	2	5	20	12.291	0.9465	0	21.8562	0.885	0	35.9787	0	0	0	0	0	0	0	0	0	250	0	0	0	0	0	0	0	0	0	0	0	0	0	0	0	0	0	0	0	0	0	0	0
28042	4	1	20.1863	57	8	2	2	5	20	9.22325	0.0675	0	16.4013	0.62775	0	26.3197	0	0	0	0	0	0	0	0	0	0	0	165	0	0	0	0	0	0	0	0	0	0	0	30	0	0	0	0	0	0	0	0	0
29012	4	2	19.2274	58	8	2	2	5	19	3.94238	1.6647	29.879	12.25	0	0	47.7361	0	0	0	0	0	0	0	0	0	0	0	100	0	0	0	0	0	0	0	0	0	0	0	0	45	0	0	0	0	0	0	0	0
29025	4	2	18.3973	58	8	2	2	5	18	32.1289	0.255	0.112	0.525	1.35	0	34.3709	0	0	0	0	0	80	0	0	0	0	0	250	0	0	0	0	0	0	0	0	0	0	20	0	0	0	0	0	0	0	0	0	0
30068	4	2	24.0274	24	43	1	2	5	24	7.1975	1.5605	0.175	11.0615	0.2	0	20.1945	0	0	0	0	0	0	0	0	0	0	0	200	0	0	0	0	0	0	0	0	0	0	0	0	40	0	0	0	0	0	0	0	0
30092	4	1	20.3945	25	43	1	2	5	20	25.5347	0.639	0.456	13.66	0.018	0	40.3077	0	0	0	0	0	0	0	0	0	0	0	200	0	0	0	0	0	0	0	0	0	0	0	0	80	0	0	0	0	0	0	0	0
33003	4	2	22.9479	79	8	4	2	5	22	2.4	0.03	29.927	3.045	0	0	35.402	0	0	0	0	0	0	0	0	0	325	0	40	0	0	0	0	0	0	0	0	0	0	0	0	0	0	0	0	0	0	0	0	0
33007	4	1	18.1918	79	8	4	2	5	18	25.911	0.5803	0	7.2805	0	0	33.7718	0	0	0	0	0	0	0	0	0	0	0	200	0	0	0	0	0	0	0	0	0	0	0	0	80	0	0	0	0	0	0	0	0
33038	4	2	20.537	79	8	4	2	5	20	0.32273	0.1122	29.907	6.138	0	0	36.4799	0	0	0	0	0	0	0	0	0	0	0	200	0	0	0	0	0	0	0	0	0	0	0	0	0	0	0	0	0	0	10	0	0
33158	4	1	20.6986	79	8	4	2	5	20	25.0175	0.563	0.224	16.3412	1.16775	0	43.3135	0	0	0	0	0	0	0	0	0	0	0	500	0	0	0	0	0	0	0	0	0	0	0	0	80	0	0	0	0	0	0	0	0
33172	4	1	18.2247	79	8	4	2	5	18	3.78	0.015	41.46	0	0	0	45.255	0	0	0	0	0	0	0	0	0	0	0	0	0	0	0	0	0	0	0	0	0	0	0	0	0	0	0	0	0	0	0	0	0
34004	4	2	22.5589	80	50	4	2	5	22	8.60925	0.0295	0	16.3814	0.63175	0	25.6518	0	0	0	0	0	0	0	0	0	200	0	0	0	0	0	0	0	0	0	0	0	0	0	0	0	0	0	0	0	0	0	0	0
34010	4	2	19.9836	80	50	4	2	5	19	7.82461	0.76	0.21	0.08	41.485	0	50.3596	0	0	0	0	0	0	0	0	0	0	0	290	0	0	0	0	0	0	0	0	0	0	0	0	0	0	0	0	40	0	0	0	0
34021	4	1	22.5726	80	50	4	2	5	22	7.5482	1.118	28.016	5.6001	0.06	0	42.3423	0	0	0	0	0	0	0	0	0	0	0	200	0	0	0	0	0	0	0	0	0	0	0	0	0	0	0	0	60	0	0	0	0
34044	4	2	23.0301	80	50	4	2	5	23	28.0571	1.4125	0.28	10.1048	0	0	39.8544	0	0	0	0	0	0	0	0	0	0	0	250	0	0	0	0	0	0	0	0	0	0	0	0	50	0	10	0	0	0	0	0	0
35004	4	2	22.8959	70	8	3	2	5	22	14.3093	0.3825	3.726	10.61	0	0	29.0278	0	0	0	0	0	0	0	0	0	0	0	750	0	0	0	0	0	0	0	0	0	0	0	0	0	0	0	0	0	0	0	0	0
35032	4	2	23.011	70	8	3	2	5	23	4.813	0.045	0	0.14	0	36.04	41.038	0	0	0	0	0	0	0	0	0	125	0	80	0	0	0	200	0	0	0	0	0	0	0	0	0	0	0	0	0	0	0	0	0
35046	4	2	24.4658	79	8	4	2	5	24	12.5863	2.29232	0.14	0.04	0	0	15.0587	0	0	0	0	0	0	0	0	0	0	0	0	0	0	0	0	0	0	0	0	0	0	0	40	0	0	0	0	0	0	0	0	0
35058	4	1	20.6164	79	8	4	2	5	20	3.3005	0.521	0	31.0245	0	0	34.846	0	0	0	0	0	0	0	0	0	0	0	440	0	0	0	0	0	0	0	0	0	0	0	20	30	0	0	0	0	0	0	250	0
37011	4	2	22.9562	122	3	3	5	5	22	7.07943	0.330473	0.203	24.714	7.33	0	39.6569	0	0	0	140	0	0	0	0	0	0	0	400	0	0	0	0	0	0	0	0	0	0	0	0	80	0	0	0	0	0	0	0	0
37028	4	1	24.3781	122	3	3	5	5	24	8.03596	0.28643	19.723	0.525	0	0	28.5704	0	0	0	0	0	0	0	0	0	0	0	300	0	0	0	0	0	0	0	0	0	0	0	40	0	0	0	0	0	0	0	0	0
38126	4	1	19.1397	112	12	3	5	5	19	1.901	0	0	11.7393	21.903	0	35.5433	0	0	0	0	0	0	0	0	0	0	0	200	0	0	0	0	0	0	0	0	0	0	0	0	50	0	0	0	0	0	0	0	0
38127	4	1	24.937	107	12	2	5	5	24	7.04945	3.4446	0.028	10.881	0	0	21.403	0	0	0	0	0	0	0	0	0	0	0	400	0	0	0	0	0	0	0	0	0	0	0	0	40	0	0	0	0	0	0	250	0
38182	4	2	23.9205	115	17	1	2	5	23	19.255	0.084	1.855	17.429	0.3	0	38.923	0	0	0	0	0	0	0	0	0	0	0	100	0	0	0	0	0	0	0	0	0	0	0	0	0	0	0	0	0	0	0	125	0
39035	4	1	24.2849	85	35	4	6	5	24	1.011	0	0	27.993	0	0	29.004	0	0	0	0	0	0	0	0	0	0	0	500	0	0	0	0	0	0	0	0	0	0	0	0	0	0	0	0	20	0	0	0	0
40018	4	2	19.0055	77	38	3	6	5	19	20.0615	1.011	0.042	16.7369	1.07775	0	38.9291	0	0	0	0	0	0	0	0	0	0	0	400	0	0	0	0	0	0	0	0	0	0	0	0	0	0	0	0	40	0	0	0	0
41011	4	2	21.0658	81	41	4	4	5	21	8.59825	0	0	16.3813	0.62775	0	25.6073	0	0	0	0	0	0	0	0	0	200	0	200	0	0	0	0	0	0	0	0	0	0	0	0	0	0	0	0	0	0	0	0	0
41023	4	1	21.0685	227	41	3	4	5	21	10.3232	0.224	0	16.3212	0.62775	0	27.4962	0	0	0	0	0	0	0	0	0	0	0	100	0	0	0	0	0	0	0	0	0	0	0	0	0	0	0	0	0	0	0	0	0
41026	4	1	20.2959	81	41	4	4	5	20	0.843	0	0	4.855	0	0	5.698	0	0	0	0	0	0	0	0	0	0	0	100	0	0	0	0	0	0	0	0	0	0	0	0	70	0	0	0	20	0	0	0	0
81101	4	1	21.0384	419	28	3	1	5	21	1.36461	0.612	35.272	9.331	0	0	46.5796	0	0	0	0	0	0	0	0	0	0	0	250	0	0	0	0	0	0	0	0	0	0	0	0	0	0	0	0	0	0	0	0	0
81104	4	2	21.4082	414	28	3	1	5	21	10.7015	0.459	0	23.0075	0.7905	0.228	35.1865	0	0	0	0	0	0	0	0	0	0	200	0	0	0	0	0	0	0	0	0	0	0	0	0	0	0	90	0	0	0	0	0	0
81213	4	2	19.6247	78	28	4	1	5	19	5.2564	0.8365	0	25.3555	0	0	31.4484	0	0	0	0	0	0	0	0	0	0	0	150	0	0	0	0	0	0	0	0	0	0	0	0	0	0	0	0	0	0	0	0	0
81217	4	2	23.2986	78	28	4	1	5	23	4.21773	0.0225	0.22	1.2	0	0	5.66023	0	0	0	0	0	0	0	0	0	0	0	500	0	0	0	0	0	0	0	0	0	0	0	0	0	0	0	0	0	0	0	0	0
81234	4	1	23.7205	78	28	4	1	5	23	16.9088	0.706	0.084	23.9292	0.81375	0	42.4418	0	0	0	0	0	0	0	0	0	0	0	100	0	0	0	0	0	0	0	0	0	0	0	0	0	0	0	0	0	0	0	0	0
81312	4	2	23.5781	78	28	4	1	5	23	33.9517	0.0375	0.14	0.678	1.7625	0	36.5697	0	0	0	150	0	0	0	0	0	0	0	220	0	0	0	0	0	0	0	0	0	0	0	0	0	0	0	0	0	0	0	0	0
81412	4	1	22.4301	28	29	1	4	5	22	12.59	0	0	27.25	0.93	0	40.77	0	0	0	0	0	0	0	0	0	0	0	500	0	0	0	0	0	0	0	0	0	0	0	0	0	0	0	0	0	0	0	0	0
81421	4	1	23.3151	78	28	4	1	5	23	31.7822	0.295	0.14	0.35	1.35	0	33.9172	0	0	0	0	0	0	0	0	0	0	250	0	0	0	0	0	0	0	0	0	0	0	0	0	0	70	0	0	0	0	0	0	0
81513	4	2	19.2	419	28	3	1	5	19	23.4612	0.483	0.14	13.381	0.9	0	38.3652	0	0	0	0	0	0	0	0	0	0	0	250	0	0	0	0	0	0	0	0	0	0	0	0	0	0	0	0	0	0	0	0	0
81520	4	1	19.9178	78	28	4	1	5	19	31.7522	0.295	0.14	0.016	1.35	0	33.5532	0	0	0	0	0	0	0	0	0	0	250	0	0	0	0	0	0	0	0	0	0	0	0	0	0	70	0	0	0	0	0	0	0
85020	4	2	20.2822	119	29	3	4	5	20	0.774	0	0	21.532	0	0	22.306	0	0	0	0	0	0	0	0	0	300	0	0	0	0	0	0	0	0	0	0	0	0	0	0	50	0	0	0	0	0	0	0	0
85047	4	1	23.1315	412	29	1	4	5	23	3.0017	0.164	10.506	15.0707	0.12425	0	28.8666	0	0	0	0	0	0	0	0	0	0	0	200	0	0	0	0	0	0	0	0	0	0	0	0	0	0	15	0	0	0	0	0	0
87018	4	2	19.1507	218	30	1	5	5	19	13.7005	0.015	14.19	4.96	0	0	32.8655	0	0	0	0	0	0	0	0	0	600	0	0	0	0	0	0	0	0	0	0	0	0	0	0	0	50	0	0	20	0	0	0	0
87045	4	2	19.2027	218	30	1	5	5	19	15.8735	0.43	0.28	4.98	0	0	21.5635	0	0	0	0	0	0	0	0	0	0	300	0	0	0	0	0	0	0	0	0	0	0	0	0	0	0	0	0	0	0	0	0	0
88004	4	2	24.4959	84	46	4	5	5	24	14.663	0.1435	0	14.0372	0.028	0	28.8717	0	0	0	100	0	0	30	0	0	200	0	0	0	0	0	0	0	0	0	0	0	0	0	0	0	0	0	0	0	0	0	0	0
88014	4	1	20.5397	84	46	4	5	5	20	17.4642	0.473	0	24.3161	0.6975	0	42.9508	0	0	0	100	0	0	0	0	0	0	0	200	0	0	0	0	0	0	0	0	0	0	0	0	0	0	0	0	0	0	0	0	0
88028	4	1	18.3452	84	46	4	5	5	18	11.4841	0.175	0.112	23.7111	0.6975	0	36.1797	0	0	0	0	0	0	0	0	0	200	0	0	0	0	0	0	0	0	0	0	0	0	0	0	0	0	0	0	20	0	0	0	0
88053	4	2	24.3178	84	46	4	5	5	24	32.3116	0.35855	5.365	5.5986	1.215	0	44.8487	0	0	0	0	0	0	0	0	0	0	0	200	0	0	0	0	0	0	0	0	0	0	0	0	0	50	0	0	0	0	0	125	0
88054	4	2	22.6274	542	46	2	5	5	22	5.10958	0.193	0.112	10.2886	4.779	0	20.4822	0	0	0	140	0	0	0	0	0	200	0	0	0	0	0	0	0	0	0	0	0	0	0	0	0	0	0	0	0	0	0	0	0
5204	1	1	4.21918	513	20	2	3	1	4	0	0.0225	0	1.4725	165.94	0	167.435	0	0	0	0	0	0	0	0	0	200	0	0	0	0	0	0	0	0	0	0	0	0	0	0	0	0	0	0	0	0	0	125	0
30088	1	1	3.56438	22	43	1	2	1	3	0.398692	0	17.566	10.881	165.94	0	194.786	0	0	0	0	0	0	0	0	0	0	0	200	0	0	0	0	0	0	0	0	0	0	0	0	0	0	0	0	0	0	0	0	0
35068	1	2	2.94521	70	8	3	2	1	2	6.41763	0.62	0.021	1.0545	166.236	0	174.349	0	0	0	0	0	0	0	0	0	0	0	400	0	0	0	0	0	0	0	0	0	0	0	0	0	0	0	0	0	0	0	0	0
2010	1	2	3.88219	62	33	2	3	1	3	3.72462	0.035	0.07	1.21	165.94	0	170.98	0	0	0	0	0	0	0	0	0	0	0	400	0	0	0	0	0	0	0	0	0	0	0	0	0	0	0	0	15	0	0	125	0
3004	1	2	4.30959	44	39	1	3	1	4	40.668	0	0	8.296	0	0.12	49.084	0	0	0	0	0	0	0	0	0	0	0	0	0	0	0	0	0	0	0	0	0	0	0	0	0	0	0	0	0	0	0	125	0
3089	1	1	4.23288	73	39	3	3	1	4	2.795	0.4975	0	14.117	165.94	0	183.35	0	0	0	0	0	0	0	0	0	0	0	250	0	0	0	0	0	0	0	0	0	0	0	0	0	0	0	0	0	0	0	125	0
3101	1	1	5.46027	73	39	3	3	1	5	2.887	0.071	0	0.7262	165.948	0	169.632	0	0	0	0	0	0	0	0	0	0	0	400	0	0	0	0	0	0	0	0	0	0	0	0	0	0	0	0	0	0	0	0	0
3302	1	2	4.26301	117	39	1	3	1	4	0.674	0	0	22.506	207.425	0	230.605	0	0	0	0	0	0	0	0	0	0	0	500	0	0	0	0	0	0	0	0	0	0	0	0	0	0	0	0	0	0	0	0	0
5033	1	1	4.10959	83	48	4	3	1	4	3.704	0.5805	0	55.352	0	0	59.6365	200	0	0	0	0	0	0	0	0	0	0	300	0	0	0	0	0	0	0	0	0	0	0	0	0	0	0	0	0	0	0	125	0
5037	1	1	4.76438	83	48	4	3	1	4	0.8544	0.015	0	13.0572	165.94	0	179.867	0	0	0	0	0	0	0	0	0	0	0	410	0	0	0	0	0	0	0	0	0	0	0	0	0	0	0	0	0	0	0	0	0
5039	1	1	5.29589	83	48	4	3	1	5	36.1065	0.0765	0	41.034	0	0.1	77.317	0	0	0	0	0	0	0	0	0	0	0	400	0	0	0	0	0	0	0	0	0	0	0	0	0	0	0	0	0	0	0	0	0
5309	1	2	4.66301	510	20	3	3	1	4	0.4718	0.015	0	43.1334	124.455	0	168.075	0	0	0	0	0	0	0	0	0	0	0	125	0	0	0	0	0	0	0	0	0	0	0	0	0	0	0	0	20	0	0	0	0
6011	1	1	3.92055	5	9	1	1	1	3	2.348	0.1525	29.767	21.8905	0	0	54.158	0	0	0	0	0	0	0	0	0	0	0	400	0	0	0	0	0	0	0	0	0	0	0	0	0	0	0	0	0	0	0	125	0
6028	1	2	4.14247	100	48	1	3	1	4	1.28527	0.615	28.058	18.662	0	0	48.6203	0	0	0	0	0	0	0	0	0	0	0	400	0	0	0	0	0	0	0	0	0	0	0	0	0	0	0	0	0	0	0	0	0
10009	1	1	3.87671	78	28	4	1	1	3	34.453	26.676	0	31.221	0.465	0	92.815	0	0	0	0	0	0	0	0	0	0	0	450	0	0	0	0	0	0	0	0	0	0	0	0	0	0	0	0	0	0	0	0	0
11040	1	2	3.69589	69	47	3	1	1	3	4.68419	0.5425	51.599	13.175	0	0	70.0007	0	0	0	0	0	0	0	0	0	0	0	400	0	0	0	0	0	0	0	0	0	0	0	0	0	0	0	0	0	0	30	0	0
11045	1	1	4.48493	69	47	3	1	1	4	0.337	0.045	19.261	9.331	0	0	28.974	0	0	0	0	0	0	0	0	0	300	0	0	0	0	0	0	0	0	180	0	0	0	0	0	0	0	0	0	0	0	0	0	0
13008	1	1	1.63288	101	2	1	1	1	#NULL!	7.6425	0.153	29.133	13.833	0.465	0	51.2265	0	0	0	0	0	0	0	0	0	300	0	0	0	0	0	0	0	0	0	0	0	0	0	0	0	0	0	0	0	0	0	125	0
14008	1	2	2.34795	134	13	2	1	1	2	6.5105	0	0.042	70.9615	0.084	0	77.598	0	0	0	0	0	0	0	0	0	0	0	250	0	0	0	0	0	0	120	0	0	0	0	0	0	0	0	0	0	0	0	0	0
15001	1	2	3.55342	67	13	3	1	1	3	0.12	0.045	53.784	7.1364	0	0	61.0854	0	0	0	0	0	0	0	0	0	0	0	200	0	0	0	0	0	0	0	0	0	0	0	0	0	0	0	0	0	0	0	0	0
17081	1	1	4.78082	54	13	2	1	1	4	1.744	1.52	0	8.272	145.197	0	156.733	0	0	0	0	0	0	0	0	0	200	0	0	0	0	0	0	0	0	0	0	0	0	0	0	0	30	0	0	0	0	0	125	0
17083	1	1	5.66849	54	13	2	1	1	5	0.1348	0	0	5.2049	0	0	5.3397	0	0	0	0	0	0	0	0	0	0	0	200	0	0	0	0	0	0	0	0	0	0	0	0	0	0	0	0	0	0	0	0	0
20006	1	1	4.66575	82	29	4	4	1	4	8.758	0.3825	0	49.838	0	0	58.9785	0	0	0	0	0	0	0	0	0	0	0	400	0	0	0	0	0	0	0	60	0	0	0	0	0	0	0	0	50	0	0	0	0
21063	1	1	3.09041	81	41	4	4	1	3	10.672	2.026	0	25.347	0.558	0	38.603	0	0	0	0	0	0	0	0	0	0	0	0	0	0	0	0	0	0	0	0	0	0	0	0	0	0	0	0	0	0	0	125	0
22077	1	2	4.09315	105	4	2	4	1	4	37.957	0	0	3.724	0	0	41.681	0	0	0	0	0	0	0	0	0	250	0	0	0	0	0	0	0	0	0	0	0	0	0	0	0	0	0	0	0	0	0	0	0
24005	1	1	2.72877	60	23	2	4	1	2	19.05	0.5355	0	0	208.325	0	227.911	0	0	0	0	0	0	0	0	0	0	0	500	0	0	0	0	0	0	0	0	0	0	0	0	50	0	0	0	15	0	0	0	0
24010	1	1	3.46301	60	23	2	4	1	3	1.35	0	0	1.86	165.94	0	169.15	0	0	0	0	0	0	0	0	0	0	0	0	0	0	0	0	0	0	0	0	0	0	0	0	0	0	0	0	0	0	0	0	0
24027	1	2	3.96438	60	23	2	4	1	3	2.25	0	0	0	165.94	0	168.19	200	0	0	0	0	0	0	0	0	0	0	400	0	0	0	0	0	0	0	0	0	0	0	0	0	0	0	0	0	0	0	0	0
25014	1	2	4.85205	120	41	2	4	1	4	2.22485	0.0075	0.028	22.712	0	0	24.9723	0	0	0	0	0	0	0	0	0	0	0	400	0	0	0	0	0	0	0	0	0	0	0	0	0	0	0	0	0	0	0	0	0
25019	1	2	2.06575	120	41	2	4	1	2	6.63735	0.015	22.438	18.8905	0.2235	0	48.2043	0	0	0	0	0	0	0	0	0	0	0	300	0	0	0	0	0	0	0	0	0	0	0	0	0	0	0	0	0	0	0	0	0
25029	1	2	4.09589	120	41	2	4	1	4	3.8215	0	0	24.6995	0.2325	0	28.7535	0	0	0	0	0	0	0	0	0	0	0	400	0	0	0	0	0	0	0	0	0	0	0	0	0	0	0	0	0	0	0	0	0
28005	1	2	3.78904	57	8	2	2	1	3	5.22085	0.045	17.538	2.883	0	0	25.6868	0	0	0	0	0	0	0	0	0	0	0	150	0	0	0	0	125	0	0	0	0	0	0	0	0	0	0	0	20	0	0	0	0
28033	1	2	3.51233	57	8	2	2	1	3	5.38196	0.045	0.098	21.1447	36.784	0	63.4537	0	0	0	0	0	0	0	0	0	0	0	200	0	0	0	0	0	15	0	0	0	0	0	0	0	0	0	0	0	0	0	0	0
28041	1	2	5.27123	57	8	2	2	1	5	13.457	0.03	0	38.368	0.7905	0	52.6455	0	0	0	0	0	0	0	0	0	0	0	400	0	0	0	0	0	0	0	0	0	0	0	20	20	0	0	0	0	0	0	125	0
29019	1	1	2.06849	58	8	2	2	1	2	12	0.0225	0	0	124.455	0	136.477	0	0	0	0	0	0	0	0	0	0	0	200	0	0	0	0	0	0	0	0	0	0	0	0	0	0	0	0	0	0	0	125	0
31001	1	1	2.39452	17	8	1	2	1	2	15.9318	0.052	0.042	5.3165	0.675	0	22.0173	0	0	0	0	130	0	0	0	0	0	0	660	0	0	0	0	0	0	0	0	0	0	0	0	0	0	0	0	0	0	0	0	0
32001	1	1	3.39452	71	8	3	2	1	3	33.1063	0.077	0	16.3012	0.62775	0	50.1123	0	0	0	0	0	0	0	0	0	0	400	0	0	0	0	0	0	0	60	0	0	0	0	0	0	0	0	0	0	0	0	0	0
33039	1	1	4.02466	79	8	4	2	1	4	77.0532	0	0.14	14.627	0	0	91.8202	0	0	0	140	0	0	0	0	0	0	0	200	0	0	0	0	0	0	0	0	0	0	0	0	0	0	0	0	10	0	0	125	0
33095	1	2	5.50411	79	8	4	2	1	5	7.774	0.313	0	6.39625	51.107	0	65.5902	200	0	0	0	0	0	0	0	0	0	0	0	0	0	0	0	0	0	0	0	0	0	0	0	0	0	0	0	0	0	0	0	0
33103	1	2	5.06849	79	8	4	2	1	5	2.924	0.306	0	18.662	0	0	21.892	0	0	0	140	0	90	0	0	0	0	0	400	0	0	0	0	0	0	0	0	0	0	0	0	0	0	0	0	0	0	0	0	0
34062	1	2	5.70959	80	50	4	2	1	5	1.401	0.4275	26.892	0	207.425	0	236.145	0	0	0	0	0	0	0	0	0	0	0	250	0	0	0	0	0	0	0	0	0	0	0	0	25	0	0	0	0	0	0	0	0
34076	1	1	5.8274	80	50	4	2	1	5	3.5244	0.06	44.82	17.1692	0	0	65.5736	0	0	0	0	0	0	0	0	0	0	0	200	0	0	0	0	0	0	0	0	0	0	0	0	0	0	0	0	0	0	0	0	0
37023	1	2	2.16986	121	3	2	5	1	2	1.828	0.876	0	9.108	82.97	0	94.782	0	0	0	0	0	0	0	0	0	0	0	640	0	0	0	0	0	0	0	0	0	0	0	0	0	0	0	0	0	0	0	125	0
38011	1	1	5.70685	64	12	2	5	1	5	9.7795	0.0075	0	28.9935	0.6975	0	39.478	0	0	0	0	0	0	0	0	0	0	0	200	0	0	0	0	0	0	0	0	0	0	0	0	0	0	0	0	25	0	0	0	0
38054	1	1	1.62466	64	12	2	5	1	#NULL!	6.91934	0.32	26.475	27.993	0	0	61.7073	0	0	0	0	0	0	0	0	0	0	0	700	0	0	0	0	0	0	0	0	0	0	0	0	25	0	0	0	0	0	0	0	0
85028	1	2	2.00548	540	29	1	4	1	2	0	0	0	0	165.94	0	165.94	0	0	0	0	0	0	0	0	0	900	0	0	0	0	0	0	0	0	60	0	0	0	0	0	0	0	0	0	0	0	0	75	0
85049	1	1	4.60548	412	29	1	4	1	4	6.8342	0	0	27.0046	0.465	0	34.3038	0	0	0	0	0	0	0	0	0	0	0	450	0	0	0	0	0	0	0	0	0	0	0	0	0	0	0	0	0	0	0	0	0
87010	1	2	3.48219	230	30	3	5	1	3	47.7792	0.09	0.14	0	2.25	0	50.2592	0	0	0	0	0	0	0	0	0	0	0	400	0	0	0	0	0	0	0	0	0	0	0	0	0	0	0	0	0	0	0	0	0
88056	1	2	3.39178	84	46	4	5	1	3	1.3572	0.153	0	11.6736	165.94	0	179.124	0	0	0	0	0	0	0	0	0	200	0	0	0	0	0	0	0	0	0	0	0	0	0	0	0	0	0	0	0	0	0	125	0
88092	1	2	3.04658	84	46	4	5	1	3	1.125	0	0	0	165.94	0	167.065	0	0	0	0	0	0	0	0	0	0	0	500	0	0	0	0	0	0	0	0	0	0	0	0	0	0	0	0	0	0	0	125	0
2004	1	1	3.90137	62	33	2	3	1	3	27.15	0.3875	0	0.0005	84.115	0	111.653	0	0	0	0	0	0	0	0	0	0	0	450	0	0	0	0	0	0	0	0	0	0	0	0	0	30	0	0	0	0	0	125	0
2005	1	1	2.32603	62	33	2	3	1	2	9.541	0.0075	21.012	1.24	166.39	0	198.19	0	0	0	0	0	0	0	0	0	0	0	440	0	0	0	0	0	0	0	0	0	0	0	0	0	0	0	0	0	0	0	250	0
2006	1	1	3.60548	62	33	2	3	1	3	0.674	0.0075	0	18.662	0	0	19.3435	0	0	0	0	0	0	0	0	0	350	0	500	0	0	0	0	0	0	0	0	0	0	0	0	0	0	0	0	0	0	0	0	0
2009	1	2	5.57534	62	33	2	3	1	5	9.08025	0.215	0	30.7982	83.3187	0	123.412	0	0	0	100	0	0	0	0	0	0	0	0	500	0	0	0	0	0	0	0	0	0	0	0	0	0	0	0	0	0	0	0	0
2011	1	2	2.99726	62	33	2	3	1	3	8.19148	0.0225	0.14	19.7593	166.521	0	194.634	0	0	0	0	0	0	0	0	0	0	0	450	0	0	0	0	0	0	0	0	0	0	0	0	0	0	0	0	0	0	0	125	0
3080	1	2	3	73	39	3	3	1	3	1.5	0.168	0	3.844	0	0	5.512	0	0	0	0	0	0	0	0	0	0	0	200	0	0	0	0	0	0	0	0	0	0	0	0	0	0	0	0	0	0	0	0	0
3162	1	1	2.09589	73	39	3	3	1	2	44.1085	0.4995	0	7.4015	2.199	0	54.2085	0	0	0	0	0	0	0	0	0	0	0	500	0	0	0	0	0	0	70	0	0	0	0	0	0	0	0	0	0	0	0	0	0
3190	1	1	5.5726	117	39	1	3	1	5	3.52127	0.3885	0.042	9.331	0	0	13.2828	0	0	0	0	0	0	0	0	0	0	0	500	0	0	0	0	0	0	140	0	0	0	0	0	0	0	0	0	0	0	0	125	0
3313	1	2	3.88767	117	39	1	3	1	3	28.3566	0.2955	0.07	36.8105	0.6975	0.15	66.3801	0	0	0	0	0	0	0	0	0	0	0	550	0	0	0	0	0	0	0	0	0	0	0	0	0	0	0	0	0	0	0	125	0
4042	1	1	4.0274	422	39	1	3	1	4	12.4425	0	0	42.1375	0.6975	0	55.2775	0	0	0	0	0	0	0	0	0	0	0	200	0	0	0	0	0	0	0	0	0	0	0	0	0	0	0	0	0	0	0	0	0
4046	1	2	2.33151	431	39	1	3	1	2	12.6	0	0	11.532	165.94	0	190.072	0	0	0	0	0	0	0	0	0	0	0	200	0	0	0	0	0	0	60	0	0	0	0	0	0	0	0	0	0	0	0	125	0
4053	1	1	3.49589	432	39	1	3	1	3	41.8148	0.22	0.126	5.766	0.9	0	48.8268	0	0	0	0	0	0	0	0	0	200	0	0	0	0	0	0	0	0	0	0	0	0	0	0	0	0	0	0	0	0	0	125	0
4055	1	1	5.07123	420	39	3	3	1	5	1.7425	0	0	30.0545	165.94	0	197.737	0	0	0	0	0	0	0	0	0	0	0	200	0	0	0	0	0	0	0	0	0	0	0	0	0	0	0	0	0	0	0	0	0
5021	1	1	4.9726	83	48	4	3	1	4	6.274	1.141	0	20.522	82.97	36.04	146.947	0	0	0	0	0	0	0	0	0	0	0	0	0	0	0	200	0	0	0	0	0	0	0	0	0	0	0	0	0	0	0	0	0
5310	1	1	4.54521	510	20	3	3	1	4	21.1295	0.4759	0.07	13.0654	104.692	0	139.433	0	0	0	0	0	0	0	0	0	0	0	200	0	0	0	0	0	0	0	0	0	0	0	0	0	0	0	0	0	0	0	125	0
6036	1	1	4.53699	100	48	1	3	1	4	1.16256	0.0525	29.802	22.856	0	0	53.8731	0	0	0	140	0	0	0	0	0	0	0	400	0	0	0	0	0	0	0	0	0	0	0	0	0	0	0	0	0	0	0	0	0
11022	1	1	3.10959	69	47	3	1	1	3	1.6315	0.0375	0	12.3605	0	0	14.0295	0	0	0	0	0	0	0	0	0	600	0	0	0	0	0	0	0	0	60	0	0	0	0	0	0	0	0	0	0	0	0	0	0
11084	1	2	3.63836	69	47	3	1	1	3	0.6205	0.03	51.543	13.9965	0	0	66.19	0	0	0	0	0	0	0	0	0	600	0	0	0	0	0	0	0	0	0	0	0	0	0	0	0	0	0	0	0	0	0	0	0
14004	1	2	4.8274	136	13	1	1	1	4	3.7275	0	0	71.2225	0	0	74.95	0	0	0	0	0	0	0	0	0	0	0	600	0	0	0	0	0	0	0	0	0	0	0	0	0	0	0	0	0	0	0	0	0
17089	1	1	4.49589	54	13	2	1	1	4	7.48305	0.04022	0.028	46.9091	14.974	0	69.4344	0	0	0	0	0	0	0	0	0	0	0	700	0	0	0	0	0	0	0	0	0	0	0	0	0	0	0	0	0	0	0	0	0
21048	1	1	3.16438	81	41	4	4	1	3	0.674	0	14.8835	18.662	0	0	34.2195	0	0	0	0	0	0	0	0	0	0	0	400	0	0	0	0	0	0	60	0	0	0	0	0	0	0	0	0	0	0	0	0	0
21089	1	2	5.28493	411	11	3	4	1	5	0.674	0	14.8835	18.662	0	0	34.2195	0	0	0	0	0	0	0	0	0	0	0	400	0	0	0	0	0	0	60	0	0	0	0	0	0	0	0	0	0	0	0	0	0
22015	1	2	3.64932	72	23	3	4	1	3	1.7	0.015	13.1325	47.648	0.168	0	62.6635	250	0	0	0	0	0	0	0	0	0	0	500	0	0	0	0	0	0	0	0	0	0	0	0	0	0	0	0	0	0	0	0	0
24004	1	1	3.92329	60	23	2	4	1	3	4.98011	0.23333	0.07	9.331	0	0	14.6144	0	0	0	135	0	0	0	0	0	0	0	200	0	0	0	0	0	0	0	0	0	0	0	0	0	0	0	0	0	0	0	0	0
24024	1	2	2.14521	60	23	2	4	1	2	1.42711	0.0765	0.07	0	165.94	0	167.514	0	0	0	0	0	0	0	0	0	0	0	500	0	0	0	0	0	0	0	0	0	0	0	0	0	0	0	0	0	0	0	0	0
24025	1	2	3.62466	60	23	2	4	1	3	0.361	0.306	0	0	165.94	0	166.607	0	0	0	0	0	0	0	0	0	0	0	500	0	0	0	0	0	0	0	0	0	0	12	0	0	0	0	0	0	0	0	0	0
24026	1	2	4.9589	60	23	2	4	1	4	9.97757	0.5616	0.042	9.331	0	0	19.9122	0	0	0	0	0	0	0	0	0	0	0	400	0	0	0	0	0	0	0	0	0	0	0	0	0	0	0	0	0	0	0	0	0
26036	1	1	4.53151	29	7	1	2	1	4	5.92812	0.28	0.07	50.251	0	0	56.5291	0	0	0	0	0	0	0	0	0	700	0	0	0	0	0	0	0	0	0	0	0	0	0	0	0	120	0	0	0	0	0	0	0
28018	1	2	5.72329	57	8	2	2	1	5	10.619	0.0635	14.008	37.6012	0.659	0	62.9507	0	0	0	0	0	0	0	0	0	0	200	0	0	0	0	0	0	0	0	0	0	0	0	0	0	0	0	0	0	0	0	0	0
28023	1	2	4.76438	57	8	2	2	1	4	35.781	0.045	0	3.472	0	0	39.298	0	0	0	0	0	0	0	0	0	0	0	0	0	0	0	0	0	0	120	0	0	0	0	0	0	0	0	0	0	0	0	0	0
28039	1	1	3.72055	57	8	2	2	1	3	5.08085	0.0975	0.028	8.4525	166.266	0	179.924	0	0	0	0	0	0	0	0	0	0	0	200	0	0	0	0	0	0	0	0	0	0	0	0	0	0	0	0	0	0	0	125	0
31015	1	1	5.01096	86	8	2	2	1	5	9.03	0.015	0.1	24.451	1.931	0	35.527	0	0	0	0	0	0	0	0	0	0	0	200	0	0	0	0	0	0	0	0	0	0	0	0	0	0	0	0	20	0	0	0	0
33004	1	1	3.40548	79	8	4	2	1	3	24.2146	0.252	0.112	21.1412	0.62775	0	46.3476	0	0	0	0	0	0	0	0	0	0	0	500	0	0	0	0	0	0	0	0	0	0	0	0	0	0	0	0	20	0	0	0	0
33083	1	1	2.50411	79	8	4	2	1	2	23.4609	0.045	0	22.5998	83.4025	0	129.508	0	0	0	0	0	0	0	0	0	0	0	560	0	0	0	0	0	0	0	0	0	0	0	0	0	0	0	0	0	0	0	0	0
33115	1	1	5.83014	79	8	4	2	1	5	6.66	1.3225	2.388	13.467	165.94	0	189.777	0	0	0	0	0	0	0	0	0	0	0	250	0	0	0	0	0	0	0	0	0	0	0	0	0	0	0	0	0	0	0	0	0
33147	1	2	4.93973	79	8	4	2	1	4	20.1819	0.7025	0.07	24.5858	0.62775	0	46.1679	0	0	0	0	110	0	0	0	0	0	0	200	0	0	0	0	0	0	0	0	0	0	0	0	40	0	0	0	0	0	0	0	0
33169	1	1	3.31507	79	8	4	2	1	3	0.337	0.612	14.8835	11.253	0	0	27.0855	0	0	0	0	0	0	0	0	0	0	0	400	0	0	0	0	0	0	0	0	0	0	0	0	0	0	0	0	0	0	0	125	0
34067	1	1	5.69041	80	50	4	2	1	5	6.527	3.1875	0	34.172	165.94	0	209.827	0	0	0	0	0	0	0	0	0	0	0	450	0	0	0	0	0	0	0	0	0	0	0	0	0	0	0	0	0	0	0	0	0
35020	1	2	3.4137	70	8	3	2	1	3	5.19927	0.015	0.042	8.7225	126.776	0	140.755	200	0	0	0	0	0	0	0	0	0	0	90	0	0	0	0	0	0	0	0	0	0	0	0	0	0	0	0	0	0	0	0	0
36003	1	2	2.06027	84	46	4	5	1	2	14.2891	0	0.07	17.706	82.97	0	115.035	0	0	0	0	0	0	0	0	0	0	0	450	0	0	0	0	0	0	0	0	0	0	0	0	0	0	0	0	15	0	0	125	0
37002	1	1	4.60274	122	3	3	5	1	4	11.3024	0.313	0.07	44.2942	0.62775	0	56.6074	0	0	0	140	0	0	0	0	0	0	0	750	0	0	0	0	0	0	0	0	0	0	0	0	0	0	0	0	0	0	0	0	0
37025	1	1	4.48767	122	3	3	5	1	4	17.2494	0.1622	0	28.0705	0	0	45.4821	0	0	0	0	0	0	0	0	0	0	0	550	0	0	0	0	0	0	0	0	0	0	0	20	0	0	0	0	0	0	0	0	0
38007	1	2	2.46027	64	12	2	5	1	2	3.64813	0.168	0.021	11.841	41.485	0	57.1631	0	0	0	0	0	0	0	0	0	800	0	0	0	0	0	0	0	0	0	0	0	0	0	0	0	0	0	0	0	0	0	0	0
38021	1	1	2.86849	64	12	2	5	1	2	1.16523	0.0225	0.14	27.993	0	0	29.3207	0	0	0	0	0	0	0	0	0	0	0	500	0	0	0	0	0	0	0	0	0	0	0	0	0	0	0	0	0	0	0	0	0
38025	1	2	5.60274	64	12	2	5	1	5	31.0433	0.386	0.028	12.214	82.97	0	126.641	0	0	0	0	0	0	0	0	0	0	500	0	0	0	0	0	0	0	0	0	0	0	0	0	0	0	0	0	0	0	0	125	0
38029	1	2	3.74247	64	12	2	5	1	3	16.2016	7.77223	0.035	11.9348	18.025	0	53.9686	0	15	0	0	0	0	0	0	0	0	250	0	0	0	0	0	0	0	0	0	0	0	0	0	40	0	0	0	0	0	0	0	0
38096	1	2	4.78082	45	12	1	5	1	4	0.015423	0.0765	0.014	0	165.94	0	166.046	0	0	0	0	0	0	0	0	0	0	0	100	0	0	0	0	0	0	0	0	0	0	0	0	0	0	0	0	0	0	0	125	0
38152	1	2	4.44384	114	17	3	2	1	4	2.0445	0.09	0	12.387	83.119	0	97.6405	0	0	0	0	0	0	0	0	0	0	0	300	0	0	0	0	0	0	0	0	0	0	0	0	0	0	0	0	0	0	0	0	0
39034	1	1	2.28219	85	35	4	6	1	2	50.5797	0.682	0.056	5.632	83.093	0	140.043	0	0	0	0	0	0	0	0	0	0	0	300	0	0	0	0	0	0	60	0	0	0	0	0	0	0	0	0	0	0	0	0	0
39051	1	2	4.40274	85	35	4	6	1	4	5.65342	0.597	0.014	18.662	0	0	24.9264	0	0	0	0	0	0	0	0	0	0	0	400	0	0	0	0	0	0	0	0	0	0	0	40	0	0	0	0	0	0	0	0	0
87006	1	1	3.30685	217	30	1	5	1	3	11.2905	3.04	0	36.7425	0.4185	0	51.4915	0	0	0	0	0	0	0	0	0	0	0	200	0	0	0	0	0	0	0	0	0	0	0	0	0	0	0	0	30	0	0	0	0
88097	1	2	3.07397	84	46	4	5	1	3	0	0	0	0	165.94	0	165.94	0	0	0	0	0	0	0	0	0	0	0	220	0	0	0	0	0	0	60	0	0	0	0	0	0	0	0	0	0	0	0	125	0
36002	2	1	6.10411	84	46	4	5	2	6	0.832	0.062	0	18.662	165.94	0	185.496	0	0	0	0	0	0	0	0	0	0	0	400	0	0	0	0	0	0	0	60	0	0	0	0	70	0	0	0	0	0	0	0	0
3161	2	1	9.66575	44	39	1	3	2	9	27.786	0	0	21.63	0	0.08	49.496	0	0	0	0	0	0	0	0	0	0	0	500	0	0	0	0	0	0	0	0	0	0	0	0	0	0	0	0	0	0	0	0	0
5001	2	1	9.97808	83	48	4	3	2	9	12.73	0	0.085	35.2473	3.1105	0	51.1728	0	0	0	0	0	0	0	0	0	500	0	0	0	0	0	0	0	0	0	0	0	0	0	5	0	0	0	0	0	0	0	0	0
25021	2	1	6.38356	120	41	2	4	2	6	1.124	0	0	18.662	165.94	0	185.726	0	0	0	0	0	0	0	0	0	0	0	350	0	0	0	0	0	0	0	0	0	0	0	0	0	0	0	0	0	0	0	0	0
25073	2	1	7.55616	120	41	2	4	2	7	1.387	0	8.755	28.551	0	0	38.693	200	0	0	125	0	0	0	0	0	0	0	150	0	0	0	0	0	0	0	0	0	0	0	0	0	0	0	0	0	0	0	0	0
36004	2	2	8.11233	84	46	4	5	2	8	2.32	0.015	0	9.1375	73.01	0	84.4825	0	0	0	0	0	0	0	0	0	0	0	0	0	0	0	0	0	0	0	0	0	0	0	0	0	0	0	0	0	0	0	250	0
2043	2	2	9.54247	500	33	3	3	2	9	0.84	0.28	0	18.849	166.063	0	186.032	0	0	0	0	0	0	0	0	0	0	0	500	0	0	0	0	0	0	0	0	0	0	0	0	0	0	0	0	0	0	0	0	0
3034	2	2	9.49863	44	39	1	3	2	9	27.3985	0	0	4.7255	165.94	0.25	198.314	0	0	0	0	0	0	0	0	0	0	0	250	0	0	0	0	0	0	0	0	0	0	0	0	0	0	0	0	0	0	0	125	0
3107	2	2	6.33699	73	39	3	3	2	6	0.7135	0.475	0	14.9385	165.94	0	182.067	0	0	0	0	0	0	0	0	0	0	0	500	0	0	0	0	0	0	0	0	0	0	0	0	0	0	0	0	0	0	0	250	0
3160	2	1	7.67671	44	39	1	3	2	7	0	0	0	0	207.425	0	207.425	0	0	0	0	0	0	0	0	0	0	0	500	0	0	0	0	0	0	70	0	0	0	0	0	0	0	0	0	0	0	0	0	0
3187	2	1	10.5534	117	39	1	3	3	10	45.4695	0.0525	0	31.1535	0.6975	0.1	77.473	0	0	0	0	0	0	0	0	0	0	0	250	0	0	0	0	0	0	70	0	0	0	0	0	0	0	0	0	0	0	0	0	0
3312	2	2	8.38356	117	39	1	3	2	8	36.8585	0.045	0	14.184	0.675	0.2	51.9625	0	0	0	0	0	0	0	0	0	0	0	250	0	0	0	0	0	0	0	0	0	0	0	0	0	0	0	0	0	0	0	125	0
4025	2	2	10.2658	420	39	3	3	3	10	0.6555	0.03	67.23	13.9965	0	0	81.912	0	0	0	0	0	0	0	0	0	0	0	200	0	0	0	0	0	0	0	0	0	0	0	0	0	0	0	0	0	0	0	0	0
4031	2	1	8.68767	420	39	3	3	2	8	59.6391	0.03	0.07	28.065	1.35	0.3	89.4541	0	0	0	0	0	0	0	0	0	0	0	200	0	0	0	0	0	0	0	0	0	0	0	0	0	0	0	0	0	0	0	0	0
4038	2	1	9.00822	420	39	3	3	2	9	15.418	0.57	0	45.914	0.93	0	62.832	0	0	0	0	0	0	0	0	0	0	0	200	0	0	0	0	0	0	0	0	0	0	0	0	0	0	0	0	0	0	0	0	0
5005	2	2	7.97808	83	48	4	3	2	7	5.7845	0.205	44.6505	20.4307	0.028	0	71.0987	0	0	0	0	0	0	0	0	0	0	0	200	0	0	0	0	0	0	0	0	0	0	0	0	0	0	0	0	30	0	0	125	0
5010	2	2	10.9589	83	48	4	3	3	10	40.668	0.0225	0	20.5968	0	0.12	61.4073	0	0	0	0	0	0	0	0	0	0	200	0	0	0	0	0	0	0	0	0	0	0	0	0	0	0	0	0	0	0	0	250	0
5016	2	2	11.9342	83	48	4	3	3	11	41.5275	0.0225	0	22.9282	0.09225	0.11	64.6805	0	0	0	0	0	0	0	0	0	0	0	400	0	0	0	0	0	0	0	0	0	0	0	0	0	0	0	0	0	0	0	0	0
5019	2	2	8.74795	83	48	4	3	2	8	46.377	0.324	0	19.614	0.4185	0.11	66.8435	0	0	0	0	0	0	0	0	0	0	0	200	0	0	0	0	0	0	0	0	0	0	0	0	0	0	0	0	0	0	0	0	0
5207	2	1	7.21918	514	20	3	3	2	7	1.2185	0.0225	0	14.2755	165.94	0	181.457	0	0	0	0	0	50	0	0	0	0	0	200	0	0	0	0	0	0	0	0	0	0	0	0	0	0	0	0	0	0	0	0	0
5214	2	1	11.7425	510	20	3	3	3	11	24.6	0.077	0	29.2585	0.6975	0	54.633	0	0	0	0	0	0	0	0	0	0	0	300	0	0	0	0	0	0	0	0	0	0	0	0	0	0	0	0	0	0	0	125	0
5301	2	1	10.3753	510	20	3	3	3	10	3.138	0.015	0	3.844	165.94	0	172.937	0	0	0	0	0	100	0	0	0	0	0	200	0	0	0	0	0	0	0	0	0	0	0	0	0	0	0	0	0	0	0	0	0
5307	2	2	10.4986	510	20	3	3	3	10	1.90227	0.045	0.042	16.92	58.408	0	77.3173	0	0	0	0	0	0	0	0	0	0	0	225	0	0	0	0	0	0	0	0	0	0	0	0	0	0	0	0	0	0	0	0	0
5314	2	1	7.14795	510	20	3	3	2	7	1.35838	0.0375	0.112	10.85	124.455	0	136.813	0	0	0	0	0	0	0	0	0	600	0	0	0	0	0	0	0	0	0	0	0	0	0	0	0	0	0	0	0	0	0	0	0
5378	2	1	9.86575	510	20	3	3	2	9	21.9776	0	0	35.7848	0	0.2	57.9624	0	0	0	0	0	0	0	0	0	0	200	0	0	0	0	0	0	0	110	0	0	0	0	0	0	0	0	0	0	0	0	0	0
7022	2	1	6.6411	75	1	3	3	2	6	10.7788	0	0.042	40.0145	0.6975	0	51.5328	0	0	0	0	0	70	0	0	0	0	0	220	0	0	0	0	0	0	0	0	0	0	0	20	0	0	0	0	0	0	0	0	0
8011	2	1	9.32603	403	28	3	1	2	9	13.595	0.205	60.507	4.841	0.04	0	79.188	0	0	0	0	0	0	0	0	0	0	0	450	0	0	0	0	0	0	0	0	0	0	0	0	50	0	0	0	0	0	0	0	0
11020	2	2	10.3151	69	47	3	1	3	10	15.5584	1.656	3.581	21.4172	0.36375	0	42.5764	0	0	0	0	0	0	0	0	0	0	0	525	0	0	0	0	0	0	0	0	0	0	0	0	0	0	0	0	0	0	0	125	0
11064	2	1	10.4082	69	47	3	1	3	10	0.5055	0	9.6305	20.7235	145.197	0	176.057	0	0	0	0	0	0	0	0	0	0	0	525	0	0	0	0	0	0	0	0	0	0	0	0	0	0	0	0	0	0	0	0	0
11103	2	2	9.7863	69	47	3	1	2	9	1.916	0.2146	0	25.668	0	0	27.7986	0	0	0	0	0	0	0	0	0	0	0	525	0	0	0	0	0	0	0	0	0	0	0	0	0	0	0	0	0	0	0	0	0
14010	2	2	7.03014	133	13	2	1	2	7	2.7005	0.12	0	6.93175	0.03075	0	9.783	0	0	0	100	0	80	0	0	0	0	0	0	0	0	0	0	0	0	0	0	0	0	0	0	0	0	0	0	20	0	0	0	0
14019	2	2	9.86027	67	13	3	1	2	9	1.195	0.11	0	9.331	165.94	0	176.576	0	0	0	0	0	0	0	0	0	0	0	400	0	0	0	0	0	0	0	0	0	30	0	0	35	0	0	0	0	0	0	0	0
14068	2	1	7.80274	206	13	1	1	2	7	2.18	2.2825	19.261	10.34	103.713	0	137.776	0	0	0	0	0	0	0	0	0	0	0	0	0	0	0	0	0	0	0	0	0	0	0	0	0	0	0	0	0	0	0	0	0
15014	2	2	8.94795	206	13	1	1	2	8	21.509	0.153	0	54.887	1.395	0	77.944	0	0	0	0	0	0	0	0	0	0	0	450	0	0	0	0	0	0	0	0	0	0	0	0	0	0	0	0	0	0	0	0	0
16015	2	1	11.8822	53	6	2	1	3	11	1.9751	0.015	22.763	24.2513	0	0	49.0044	0	0	0	0	0	0	0	0	0	360	0	0	0	0	0	0	0	0	0	0	0	0	0	0	0	30	0	0	0	0	0	0	0
16040	2	2	8.73425	53	6	2	1	2	8	11.774	0.0135	0	22.506	0	0	34.2935	0	0	0	0	0	0	0	0	0	0	0	350	0	0	0	0	0	0	0	0	0	0	0	0	0	0	0	0	0	0	0	0	0
17009	2	1	7.52329	78	28	4	1	2	7	2.9242	0.2805	9.6305	36.8316	0	0	49.6668	200	0	0	0	0	0	0	0	0	0	0	600	0	0	0	0	0	0	0	0	0	0	0	0	0	0	0	0	0	0	0	0	0
17069	2	1	7.00548	54	13	2	1	2	7	7.31275	1.71	0	31.1017	70.9197	0	111.044	0	0	0	0	0	0	0	0	0	0	0	400	0	0	0	0	0	0	0	0	0	0	0	0	0	0	0	0	0	0	0	0	0
20012	2	1	6.07123	141	29	2	4	2	6	14.4261	0.00033	0.252	42.0805	0.93	0	57.6889	0	0	0	0	0	0	0	0	0	0	0	200	0	0	0	0	0	0	0	0	0	0	20	0	0	0	0	0	0	0	0	0	0
21049	2	2	7.5726	235	21	2	4	2	7	0.74	0.123	0	29.6686	42.879	0	73.4106	150	0	0	0	0	0	0	0	0	0	0	400	0	0	0	0	0	0	60	0	0	0	0	0	0	0	0	0	0	0	0	0	0
21050	2	2	10.5288	81	41	4	4	3	10	2.6495	1.314	0	9.3185	165.94	0	179.222	0	0	0	0	0	0	0	0	0	0	0	400	0	0	0	0	0	0	0	0	0	0	0	0	0	0	0	0	0	0	0	0	0
21087	2	1	8.18356	411	11	3	4	2	8	29.249	0.0375	0	20.1345	1.35	0	50.771	150	0	0	0	0	0	0	0	0	0	0	400	0	0	0	0	0	0	60	0	0	0	0	0	0	0	0	0	0	0	0	0	0
24050	2	2	9.9726	60	23	2	4	2	9	1.5185	0.5355	0	4.7655	165.94	0	172.76	0	0	0	0	0	0	0	0	0	0	0	200	0	0	0	0	0	0	0	0	0	0	0	0	0	0	0	0	0	0	0	0	0
25012	2	1	10.063	120	41	2	4	3	10	10.7746	0.177	44.855	34.937	0.465	0	91.2086	200	0	0	100	0	0	0	0	0	0	0	400	0	0	0	0	0	0	0	0	0	0	0	0	30	0	0	0	0	0	0	0	0
25041	2	2	9.16986	120	41	2	4	2	9	10.0501	3.204	0.07	35.722	0	0	49.0461	0	0	0	0	0	0	0	0	0	0	0	500	0	0	0	0	0	0	0	0	0	0	0	0	0	0	0	0	0	0	0	0	0
25079	2	2	8.27397	120	41	2	4	2	8	2.9465	0.1075	0	20.212	0	0	23.266	0	0	0	0	0	0	0	0	0	0	0	300	0	0	0	0	0	0	0	0	0	0	0	0	0	0	0	0	0	0	0	0	0
28045	2	2	11.411	71	8	3	2	3	11	0.15	0	67.23	0.09	0	0	67.47	0	0	0	0	0	0	0	0	0	0	0	200	0	0	0	0	0	0	0	0	0	0	0	0	0	0	0	0	20	0	0	0	0
29004	2	1	8.12055	58	8	2	2	2	8	10.4478	0.0675	59.737	9.331	0	0	79.5833	0	0	0	0	0	0	0	0	0	0	0	175	0	0	0	0	0	0	0	0	0	0	0	0	0	0	0	0	0	0	0	0	0
30051	2	2	9.09041	23	43	1	2	2	9	28.52	0.2685	17.51	27.832	0.7455	0	74.876	0	0	0	0	0	0	0	0	0	0	0	250	0	0	0	0	0	0	0	0	0	0	0	0	0	0	0	0	0	0	0	0	0
31008	2	1	7.58904	17	8	1	2	2	7	3.3435	2.8665	28.016	25.12	0	0	59.346	0	0	0	0	0	0	0	0	0	500	0	0	0	0	0	0	0	0	0	0	0	0	0	0	30	0	0	0	0	0	0	0	0
31010	2	2	9.59452	17	8	1	2	2	9	0.05	0.0375	44.6505	4.2684	0	0	49.0064	0	0	0	0	0	0	0	0	0	0	0	200	0	0	0	0	0	0	0	0	0	0	0	0	0	0	0	0	0	0	0	0	0
33073	2	1	10.0411	79	8	4	2	3	10	72.0675	0.2295	0	13.9965	0	0	86.2935	0	0	0	0	0	80	0	0	0	200	0	0	0	0	0	0	0	0	0	0	0	0	0	0	0	0	0	0	40	0	0	0	0
33090	2	2	7.77808	79	8	4	2	2	7	1.133	0	0	3.9375	0.0615	0	5.132	0	0	0	0	0	50	0	0	0	0	0	0	0	0	0	0	0	0	0	0	0	0	0	0	0	0	0	0	0	0	0	0	0
33092	2	2	7.10411	79	8	4	2	2	7	45.5643	0.198	3.68	30.8483	0.86025	0	81.1508	0	0	0	0	0	0	0	0	0	0	0	700	0	0	0	0	0	0	0	0	0	0	0	0	0	0	0	0	0	0	0	0	0
33138	2	2	11.2904	79	8	4	2	3	11	39.2482	0.06	0	16.3012	0.62775	0	56.2373	0	0	0	0	100	0	0	0	0	0	0	200	0	0	0	0	0	0	0	0	0	0	0	0	0	0	0	0	0	0	0	0	0
34071	2	2	7.40274	80	50	4	2	2	7	11.885	1.6665	0	12.7762	0.92625	0	27.254	0	0	0	0	0	0	0	0	0	300	0	0	0	0	0	0	0	0	0	0	0	0	0	0	40	0	0	0	0	0	0	0	0
34073	2	1	7.63562	80	50	4	2	2	7	3.113	0.653	0	7.3102	58.416	0	69.4922	0	0	0	0	0	0	0	0	0	0	0	250	0	0	0	0	0	0	0	0	0	0	0	0	0	0	0	0	0	0	0	0	0
34084	2	2	7.79178	80	50	4	2	2	7	2.027	0.475	21.012	17.888	165.94	0	207.342	0	0	0	0	0	0	0	0	0	550	0	0	0	0	0	0	0	0	0	0	0	0	0	0	0	0	50	0	0	0	0	0	0
34087	2	2	9.45753	80	50	4	2	2	9	5.747	0.657	0	42.154	0.186	0	48.744	0	0	0	0	0	0	0	0	0	0	0	200	0	0	0	0	0	0	0	0	0	0	0	0	0	0	0	0	0	0	0	0	0
37015	2	2	7.55342	121	3	2	5	2	7	0.2022	0.0075	0	7.9086	0	0	8.1183	0	0	0	0	0	0	0	0	0	0	0	300	0	0	0	0	0	0	0	0	0	0	0	0	0	0	0	0	0	0	0	0	0
38001	2	2	10.2767	64	12	2	5	3	10	0.752	0.108	0	43.479	0.252	0	44.591	0	0	0	0	0	0	0	0	0	0	0	200	0	0	0	0	0	0	0	0	0	0	0	0	0	0	0	0	25	0	0	0	0
38056	2	2	11.9397	107	12	2	5	3	11	4.295	0.5515	0	80.96	0	0	85.8065	0	0	0	0	0	0	0	0	0	0	0	0	0	0	0	0	0	0	0	0	0	0	0	0	55	0	0	0	20	0	0	0	0
39033	2	1	6.7589	85	35	4	6	2	6	40.9082	0.015	0.056	16.0305	0	0	57.0097	200	0	0	130	0	0	0	0	0	0	0	400	0	0	0	0	0	0	0	0	0	0	0	0	0	0	0	0	0	0	0	0	0
39069	2	1	6.63836	52	35	1	6	2	6	1.8	0	0	0	0	0	1.8	200	0	0	0	0	0	0	0	0	0	0	0	0	0	0	0	0	0	0	0	0	0	0	0	0	0	0	0	0	0	0	0	0
85010	2	2	11.9808	119	29	3	4	3	11	17.549	0.015	0	27.502	0	0	45.066	0	0	0	0	0	0	0	0	0	0	0	200	0	0	0	0	0	0	0	0	0	0	0	0	0	0	0	0	0	0	0	0	0
85051	2	2	11.674	412	29	1	4	3	11	4.2336	2.28	0	57.1968	0	0	63.7104	0	0	0	0	0	0	0	0	0	0	0	400	0	0	0	0	0	0	0	0	0	0	0	0	0	0	0	0	0	0	0	0	0
87023	2	1	9.48219	218	30	1	5	2	9	5.962	0.06	0	15.097	165.94	0	187.059	0	0	0	0	0	0	0	0	0	0	200	0	0	0	0	0	0	0	0	0	0	0	0	0	0	100	0	0	0	0	0	125	0
88022	2	1	7.51233	543	46	1	5	2	7	1.8198	0.153	0	52.8674	0	0	54.8402	200	0	0	0	0	0	0	0	0	0	0	600	0	0	0	0	0	0	0	0	0	0	0	0	0	0	0	0	0	0	0	0	0
88041	2	2	10.9096	84	46	4	5	3	10	0	0.015	0	0	0	0	0.015	0	0	0	0	0	0	0	0	0	0	0	400	0	0	0	0	0	0	0	0	0	0	0	0	0	0	0	0	0	0	0	0	0
88049	2	2	11.2986	84	46	4	5	3	11	11.5103	0	0	42.9219	0.7905	0	55.2227	0	0	0	0	0	0	0	0	0	0	0	400	0	0	0	0	0	0	0	0	0	0	0	0	0	0	40	0	0	0	0	125	0
88064	2	2	11.1123	84	46	4	5	3	11	1.0742	1.066	17.51	29.4826	0	0	49.1328	0	0	0	0	0	80	0	0	0	0	0	200	0	0	0	0	0	0	0	0	0	0	0	0	0	0	0	0	0	0	0	0	0
88066	2	1	10.6959	84	46	4	5	3	10	27.2384	0	0	49.8372	1.488	0	78.5636	0	0	0	0	0	0	0	0	0	0	0	400	0	0	0	0	0	0	0	0	0	0	0	0	0	0	0	0	0	0	0	0	0
2002	2	1	6.76164	62	33	2	3	2	6	7.306	0.015	0	50.918	0.465	0	58.704	0	0	0	0	0	0	0	0	0	0	0	750	0	0	0	0	0	0	0	0	0	0	0	0	0	0	0	0	0	0	0	0	0
2016	2	1	7.82192	62	33	2	3	2	7	4.6365	0.572	0	79.6939	0.056	0	84.9584	0	0	0	0	0	0	0	0	0	0	0	500	0	0	0	0	0	0	0	0	0	0	0	0	0	0	0	0	0	0	0	0	0
2017	2	1	9.56712	62	33	2	3	2	9	63.577	0.135	15.759	7.625	0	0	87.096	0	0	0	0	0	0	0	0	0	0	0	400	0	0	0	0	0	0	0	0	0	0	0	0	0	0	0	0	0	0	0	0	0
2020	2	1	9.74247	62	33	2	3	2	9	6.527	1.584	13.1325	7.566	165.94	0	194.75	0	0	0	0	0	0	0	0	0	0	0	600	0	0	0	0	0	0	0	0	0	0	0	0	0	0	0	0	0	0	0	125	0
2022	2	2	6.42192	62	33	2	3	2	6	2.7945	0.3	0.2	18.6395	165.94	0	187.874	0	0	0	0	0	0	0	0	0	0	0	300	0	0	0	0	0	0	0	0	0	0	0	0	0	0	0	0	0	0	0	0	0
2027	2	2	8.32329	62	33	2	3	2	8	33.313	0	0	48.5905	0	0.3	82.2035	0	0	0	0	0	0	0	0	0	0	0	350	0	0	0	0	0	0	0	0	0	0	0	0	0	0	0	0	0	0	0	125	0
3148	2	1	6.32603	44	39	1	3	2	6	7.39054	0.1325	0.084	0	207.425	0	215.032	0	0	0	0	0	0	0	0	0	0	250	0	0	0	0	0	0	0	0	0	0	0	0	0	0	0	0	0	0	0	0	0	0
3174	2	1	8.33973	73	39	3	3	2	8	12.659	0.0375	0	36.339	0.744	0	49.7795	0	0	0	0	0	0	0	0	0	0	0	250	0	0	0	0	0	0	0	0	0	0	0	10	0	0	0	0	0	0	0	0	0
4036	2	2	11.7315	420	39	3	3	3	11	1.011	0	0	33.387	165.94	0	200.338	0	0	0	0	0	0	0	0	0	400	0	0	0	0	0	0	0	0	0	0	0	0	0	0	0	0	0	0	0	0	0	0	0
4037	2	1	11.9479	420	39	3	3	3	11	0.2765	0.1535	78.795	2.883	0	0	82.108	0	0	0	0	0	0	0	0	0	0	0	500	0	0	0	0	0	0	0	0	0	0	0	0	0	0	0	0	0	0	0	0	0
4052	2	2	8.51507	427	39	1	3	2	8	22.731	0.06	0.21	27.993	0	0	50.994	0	0	0	0	0	0	0	0	0	0	0	200	0	0	0	0	0	0	0	0	0	0	0	50	0	0	0	0	0	0	0	0	0
4056	2	1	11.1534	420	39	3	3	3	11	30.746	0	0	7.222	165.94	0.3	204.208	0	0	0	0	0	0	0	0	0	0	0	0	0	0	0	0	0	0	0	0	0	0	0	0	0	0	0	0	0	0	0	0	0
4057	2	2	11.4932	420	39	3	3	3	11	21.257	0.76	0	41.911	1.395	0	65.323	0	0	0	0	0	0	0	0	0	200	0	0	0	0	0	0	0	0	0	0	0	0	0	0	0	50	0	0	0	0	0	125	0
5007	2	2	7.19726	83	48	4	3	2	7	8.887	0.0225	24.514	17.517	0	0	50.9405	0	0	0	0	0	0	0	0	0	0	0	200	0	0	0	0	0	0	0	0	0	0	0	0	0	0	0	0	0	0	0	125	0
5106	2	2	9.89041	83	48	4	3	2	9	28.0664	0.1575	0.112	32.109	0.6975	0	61.1424	0	0	0	0	0	0	0	0	0	0	0	225	0	0	0	0	0	0	0	0	0	0	0	0	0	0	0	0	0	0	0	0	0
5321	2	2	8.64658	510	20	3	3	2	8	2.48634	0.371	0.084	42.0494	83.138	0	128.129	0	0	0	0	0	0	0	0	0	0	0	400	0	0	0	0	0	0	0	0	0	0	0	0	0	0	0	0	0	0	0	0	0
5511	2	1	10.9973	75	1	3	3	3	11	67.0112	0.42	1.8675	6.163	0.348	0.16	75.9697	0	0	0	0	0	0	0	0	0	225	0	0	0	0	0	0	0	0	0	0	0	0	0	0	0	0	0	0	30	0	0	0	0
5520	2	1	9.14795	524	1	1	3	2	9	19.6818	1.7065	0	31.9988	1.23225	2.1075	56.7268	0	0	0	0	0	0	0	0	0	0	0	250	0	0	0	0	0	0	0	0	0	0	0	0	15	0	30	0	0	0	0	125	0
6035	2	1	8.39452	100	48	1	3	2	8	11.2065	0.9875	0	59.2425	0.6975	0	72.134	0	0	0	0	0	0	0	0	0	0	0	450	0	0	0	0	0	0	60	0	0	0	0	0	0	0	0	0	0	0	0	0	0
11007	2	2	10.6986	16	49	1	1	3	10	51.337	4.27472	2.985	8.4755	0	0.1	67.1722	0	0	0	0	0	250	0	0	0	0	0	500	0	0	0	0	0	0	0	0	0	0	0	0	0	0	0	0	0	0	0	0	0
11031	2	2	6.46849	69	47	3	1	2	6	1.0025	0.459	0	47.9135	0.196	0	49.571	0	0	0	0	0	0	0	0	0	0	0	200	0	0	0	0	0	0	0	0	0	0	0	0	0	0	0	0	0	0	0	0	0
11086	2	2	10.4795	69	47	3	1	3	10	11.9625	0.57	9.6305	57.4498	0.62775	0	80.2405	0	0	0	0	0	0	0	0	0	675	0	200	0	0	0	0	0	0	0	0	0	0	0	0	0	0	20	0	0	0	0	0	0
13013	2	1	9.84384	46	46	1	5	2	9	6.99162	0.378	0.07	23.2308	36.505	0	67.1754	0	0	0	0	0	150	0	0	0	0	0	400	0	0	0	0	0	0	0	0	0	0	0	0	0	0	0	0	0	0	0	0	0
13028	2	2	8.77808	46	46	1	5	2	8	31.8685	1.365	0	39.283	0.852	0	73.3685	0	0	0	0	0	0	0	0	0	0	0	400	0	0	0	0	0	0	0	0	0	0	0	0	0	0	0	0	0	0	0	0	0
13030	2	2	9.93699	46	46	1	5	2	9	7.37986	0.6525	22.924	19.82	0	0	50.7764	0	0	0	125	0	0	0	0	0	0	0	200	0	0	0	0	0	0	0	0	0	0	0	0	0	0	0	0	0	0	0	0	0
13222	2	2	10.7205	101	2	1	1	3	10	12.59	0.0075	0	25.6225	166.87	0	205.09	0	0	0	0	125	0	0	0	0	0	0	200	0	0	0	0	0	0	0	0	0	0	0	0	0	0	0	0	0	0	0	0	0
14069	2	1	7.1863	203	13	1	1	2	7	2.855	0	0	57.677	0.0615	0	60.5935	0	0	0	0	0	0	0	0	0	0	0	400	0	0	0	0	0	0	0	0	0	0	0	0	0	0	0	0	0	0	0	0	0
15012	2	2	6.34795	211	13	1	1	2	6	12.5717	0.03	0	38.0108	0.81375	0	51.4263	0	0	0	0	0	0	0	0	0	0	0	225	0	0	0	0	0	0	0	0	0	0	0	0	0	0	0	0	0	0	0	0	0
15015	2	2	10.7781	206	13	1	1	3	10	12.29	0.03	0.098	23.826	124.92	0	161.164	0	0	0	0	0	0	0	0	0	0	0	200	0	0	0	0	0	0	0	0	0	0	0	0	0	0	0	0	0	0	0	0	0
15056	2	2	10.1863	203	13	1	1	3	10	1.53811	0.03	0.07	31.892	0	0	33.5301	0	0	0	0	0	0	0	0	0	0	0	200	0	0	0	0	0	0	0	0	0	0	0	0	0	0	0	0	0	0	0	0	0
21030	2	2	8.04932	125	41	1	4	2	8	0.4955	0.3	28.016	6.2165	103.713	0	138.74	0	0	0	0	0	0	0	0	0	0	200	0	0	0	0	0	0	0	0	0	0	0	0	0	0	0	0	0	80	0	0	0	0
21045	2	2	7.99726	81	41	4	4	2	8	8.66675	0	0	20.9668	0.62775	0	30.2613	0	0	0	0	0	0	0	0	0	0	0	300	0	0	0	0	0	0	60	0	0	0	0	0	0	0	0	0	0	0	0	0	0
21055	2	1	10.8164	81	41	4	4	3	10	2.2615	0.015	0	10.8663	166.032	0	179.175	0	0	0	0	0	0	0	0	0	0	0	450	0	0	0	0	0	0	0	0	0	0	0	0	0	0	0	0	0	0	0	0	0
21059	2	2	10.1945	81	41	4	4	3	10	13.1828	0.015	0	31.6698	0.86025	0	45.7278	0	0	0	0	0	0	0	0	0	0	0	200	0	0	0	0	0	0	0	0	0	0	0	0	0	0	0	0	20	0	0	0	0
21062	2	2	7.76438	81	41	4	4	2	7	27.0207	0	0	29.7838	0.86025	0	57.6647	0	0	0	0	0	0	0	0	0	0	0	200	0	0	0	0	0	0	0	0	0	0	0	0	0	0	0	0	0	0	0	0	0
22010	2	2	7.88219	72	23	3	4	2	7	3.6345	0.788	0	57.2875	0.224	0	61.934	0	0	0	0	0	0	0	0	0	250	0	0	0	0	0	0	0	0	0	0	0	0	0	0	0	0	0	0	10	0	0	125	0
22012	2	1	7.24932	72	23	3	4	2	7	1.05	0	0	0.0625	207.425	0	208.537	125	0	0	0	250	0	0	0	0	0	0	500	0	0	0	0	0	0	0	0	0	0	0	0	0	0	0	0	0	0	0	0	0
22017	2	1	8.74247	72	23	3	4	2	8	5.368	0.215	0	39.2615	0	0	44.8445	0	0	0	0	0	0	0	0	0	500	0	0	0	0	0	0	0	0	0	0	0	0	0	0	0	0	0	0	0	0	0	0	0
22024	2	1	10.5562	72	23	3	4	3	10	1.011	0	0	52.018	0	0	53.029	0	0	0	0	0	0	0	0	0	0	0	500	0	0	0	0	0	0	0	0	0	0	0	0	0	0	0	0	30	0	0	0	0
22025	2	2	8.76712	72	23	3	4	2	8	0.674	0	0	50.375	0	0	51.049	0	0	0	0	0	0	0	0	0	0	0	750	0	0	0	0	0	0	0	0	0	0	0	0	0	0	0	0	0	0	0	0	0
22030	2	1	9.77808	72	23	3	4	2	9	4.136	0.215	35.856	27.993	0	0	68.2	0	0	0	0	0	0	0	0	0	500	0	0	0	0	0	0	0	0	0	0	0	0	0	0	0	0	0	0	0	0	0	0	0
22044	2	1	11.3644	72	23	3	4	3	11	0.704846	0	0.028	18.662	0	0	19.3948	0	0	0	0	0	0	0	0	0	0	0	500	0	0	0	0	0	0	180	0	0	0	0	0	0	0	0	0	0	0	0	0	0
24015	2	1	7.74795	60	23	2	4	2	7	45.796	1.89633	5.744	16.2622	1.125	0	70.8235	0	0	0	0	0	0	0	0	0	0	0	200	0	0	0	0	0	0	0	0	0	0	60	0	0	0	0	0	0	0	0	0	0
24016	2	1	6.06027	60	23	2	4	2	6	7.69298	0.306	0.158	19.072	0.008	0	27.237	0	0	0	0	0	0	0	0	0	0	0	400	0	0	0	0	0	0	60	0	0	0	0	0	0	0	0	0	0	0	0	0	0
24018	2	1	6.96438	60	23	2	4	2	6	5.803	0.5425	0	19.499	0	0	25.8445	0	0	160	0	0	0	0	0	0	0	0	400	0	0	0	0	0	0	0	0	0	0	0	0	0	0	0	0	0	0	0	0	0
24030	2	1	6.70137	72	23	3	4	2	6	1.21626	29.4544	0.035	25.0771	1.466	0	57.2488	0	0	0	0	0	0	0	0	0	0	0	400	0	0	0	0	0	0	0	0	0	0	65	0	0	0	0	0	0	0	0	0	0
26002	2	2	8.78082	28	7	1	2	2	8	4.5515	0.3025	0.182	37.424	0	0	42.46	0	0	0	0	0	0	0	0	0	0	0	400	0	0	0	0	0	0	0	0	0	0	0	0	0	0	0	0	0	0	0	0	0
27017	2	1	11.8932	56	8	2	2	3	11	4.65004	0.077	0.084	1.55	145.197	0	151.559	0	0	0	0	0	0	0	0	0	0	0	350	0	0	0	0	0	0	0	0	0	0	0	65	0	0	0	0	0	0	0	125	0
28015	2	1	8.55068	57	8	2	2	2	8	11.6985	0.12	14.008	29.423	0.837	0	56.0865	0	0	0	0	0	0	0	0	0	0	0	0	0	0	0	0	0	0	60	0	0	0	0	0	30	0	0	0	0	0	0	125	0
28035	2	2	11.6575	57	8	2	2	3	11	15.5979	0.0895	17.58	29.5837	1.13925	0	63.9904	0	0	0	0	0	0	0	0	0	0	0	0	0	0	0	0	225	0	0	0	0	0	0	0	25	0	0	0	0	0	0	0	0
28040	2	2	6.3863	57	8	2	2	2	6	30.0871	0.06	14.8835	7.4648	0	0	52.4954	0	0	0	0	0	0	0	0	0	0	0	400	0	0	0	0	0	0	0	0	0	0	0	25	0	0	0	0	0	0	0	0	0
28082	2	1	11.3863	71	8	3	2	3	11	7.556	2.3325	0	16.252	165.94	0	192.081	0	0	0	0	0	0	0	0	0	0	0	0	0	0	0	0	0	0	0	0	0	0	0	0	60	0	0	0	0	0	0	0	0
28085	2	1	11.126	71	8	3	2	3	11	2.0055	0.06	0	15.5465	165.94	0	183.552	0	0	0	0	0	0	0	0	0	0	0	200	0	0	0	0	0	0	0	0	0	0	0	0	0	0	0	0	0	0	0	0	0
29008	2	2	10.4219	58	8	2	2	3	10	3.363	1.8575	29.767	13.713	0	0	48.7005	0	0	0	0	0	0	0	0	0	0	0	200	0	0	0	0	0	0	0	0	0	0	0	0	30	0	0	0	0	0	0	125	0
29009	2	1	9.42466	58	8	2	2	2	9	24.3031	0.205	0.133	46.599	1.2555	14.416	86.9116	0	0	0	0	0	0	0	0	0	0	0	200	0	0	0	80	0	0	0	0	0	0	0	0	0	0	0	0	0	0	0	0	0
30004	2	1	6.92055	25	43	1	2	2	6	10.9842	0.306	0.056	70.4725	0.9775	0	82.7962	0	0	0	0	0	0	0	0	0	0	0	200	0	0	0	0	0	0	0	0	0	0	0	0	0	0	0	0	0	0	0	0	0
30006	2	2	9.43288	25	43	1	2	2	9	33.1166	0.92	0.07	30.737	1.59	0	66.4336	200	0	0	0	0	0	0	0	0	0	0	800	0	0	0	0	0	0	0	0	0	0	0	0	0	0	0	0	0	0	0	0	0
30025	2	1	7.29863	21	43	1	2	2	7	11.1546	1.884	0.07	28.1739	166.637	0	207.92	0	0	0	0	0	0	0	0	0	0	0	400	0	0	0	0	0	0	0	0	0	0	0	0	0	0	0	0	0	0	0	0	0
33001	2	1	8.38082	79	8	4	2	2	8	13.2013	0.015	0.084	33.8777	0.86025	0	48.0383	0	0	0	0	0	0	0	0	0	0	0	200	0	0	0	0	0	0	0	0	0	0	0	0	0	0	0	0	0	0	0	0	0
33009	2	2	11.6575	79	8	4	2	3	11	5.19185	0.665	14.9115	3.993	166.186	0	190.947	0	0	0	0	0	0	0	0	0	0	0	300	0	0	0	0	0	0	0	0	0	0	0	0	0	0	0	0	0	0	0	0	0
33017	2	1	8.4274	79	8	4	2	2	8	7.188	0.6725	0	14.0315	36.05	0	57.942	200	0	0	0	0	0	0	0	0	0	0	250	0	0	0	0	0	0	0	0	0	0	0	0	0	0	0	0	0	0	0	0	0
33042	2	2	6.91781	79	8	4	2	2	6	17.3335	0.2295	0	41.9335	1.2555	0	60.752	0	0	0	0	0	0	0	0	0	250	0	0	0	0	0	0	0	0	0	0	0	0	0	0	0	60	0	0	0	0	0	125	0
33063	2	1	7.68493	79	8	4	2	2	7	10.4392	0.07877	0.24	6.645	167.487	0	184.89	0	0	0	0	0	0	0	0	0	0	0	500	0	0	0	0	0	0	0	0	0	0	0	0	0	0	0	0	0	0	0	125	0
33064	2	2	8.44384	79	8	4	2	2	8	10.8519	0.386	0.056	19.1842	0.62775	0	31.1059	0	0	0	0	0	0	0	0	0	0	0	0	0	0	0	0	0	0	0	0	0	0	0	0	0	60	0	0	0	0	0	0	0
33082	2	2	7.53151	79	8	4	2	2	7	10.931	0.4155	0.182	4.56875	36.505	0	52.6022	0	0	0	0	0	0	0	0	0	0	0	300	0	0	0	0	0	0	0	0	0	0	0	0	0	0	0	0	0	0	0	0	0
33087	2	1	9.49041	79	8	4	2	2	9	0.797	0.902	0	10.9905	166.063	0	178.752	0	0	0	140	0	0	0	0	0	0	0	400	0	0	0	0	0	0	0	0	0	0	0	0	40	0	0	0	0	0	0	0	0
33126	2	2	7.62466	79	8	4	2	2	7	22.002	0	0	46.599	1.2555	0	69.8565	0	0	0	0	0	0	0	0	0	200	0	0	0	0	0	0	0	0	120	0	0	0	0	0	0	0	0	0	0	0	0	0	0
33140	2	2	11.3918	79	8	4	2	3	11	3.79754	0.0765	0.084	6.3426	165.94	0	176.241	0	0	0	0	100	0	0	0	0	0	0	65	0	0	0	0	0	0	60	0	0	0	0	0	0	0	0	0	0	0	0	0	0
33142	2	1	9.85479	79	8	4	2	2	9	27.8928	0.306	0	29.8161	0.62775	0	58.6427	0	0	0	0	0	0	0	0	0	0	0	250	0	0	0	0	0	0	0	0	0	0	0	0	30	0	0	0	0	0	0	0	0
34050	2	1	9.99178	80	50	4	2	3	10	0.4766	0	0	13.5222	124.455	0.171	138.625	0	0	0	0	0	0	0	0	0	0	0	800	0	0	0	0	0	0	0	0	0	0	0	0	0	0	0	0	0	0	0	0	0
34061	2	2	6.11507	80	50	4	2	2	6	7.4113	0.015	0	22.6603	0.54225	0	30.6288	0	0	0	0	0	0	0	0	0	0	0	200	0	0	0	0	0	0	0	0	0	0	0	0	0	0	0	0	0	0	0	0	0
34069	2	2	11.5205	80	50	4	2	3	11	7.97356	0.935	58.301	1.4885	0.0615	0	68.7596	0	0	0	0	0	0	0	0	0	0	0	0	0	0	0	0	0	0	0	0	0	0	0	0	225	0	0	0	0	0	0	125	0
34088	2	2	9.77808	80	50	4	2	2	9	0.674	0.0525	0	18.662	248.91	0	268.298	0	0	0	0	0	0	0	0	0	0	0	350	0	0	0	0	0	15	0	0	0	0	0	0	0	0	0	0	0	0	0	0	0
35053	2	2	8.79178	70	8	3	2	2	8	15.1915	0.0075	0.035	6.0965	165.94	0.15	187.421	0	0	0	0	0	0	0	0	0	0	200	0	0	0	0	0	0	0	0	0	0	0	0	0	15	0	0	0	0	0	0	125	0
36012	2	1	11.874	84	46	4	5	3	11	2.3515	0	41.46	17.2365	0	0	61.048	200	0	0	0	0	0	0	0	0	400	0	0	0	0	0	0	0	0	0	0	0	0	0	0	0	0	0	0	0	0	0	0	0
38035	2	1	10.8685	64	12	2	5	3	10	1.042	0.0075	67.23	9.573	0	0	77.8525	0	0	0	0	0	0	0	0	0	0	0	200	0	0	0	0	0	0	0	0	0	0	0	0	0	0	0	0	25	0	0	0	0
38036	2	2	9.30959	64	12	2	5	2	9	10.6166	13.913	17.58	6.4575	0	0	48.5671	0	0	0	0	0	0	0	0	0	0	0	200	0	50	0	0	0	0	0	60	0	0	0	0	0	0	0	0	25	0	0	125	0
38038	2	1	8.45205	64	12	2	5	2	8	2.587	0	0	9.331	207.425	0	219.343	0	0	0	0	0	0	0	0	0	0	0	500	0	0	0	0	0	0	0	0	0	0	0	0	0	0	0	0	50	0	0	0	0
38052	2	2	7.56438	64	12	2	5	2	7	3.954	0	26.265	11.0385	25.185	0	66.4425	0	0	0	0	0	150	0	0	0	0	0	250	0	0	0	0	0	0	0	0	0	0	0	0	0	0	0	0	0	0	0	125	0
38141	2	1	11.9616	114	17	3	2	3	11	1.70704	0.21605	0.084	4.6655	165.94	0	172.613	0	0	0	0	0	0	0	0	0	400	0	0	0	0	0	0	0	0	0	0	0	0	0	0	0	30	0	0	0	0	0	0	0
38151	2	2	8.03014	114	17	3	2	2	8	3.94442	0.57	0.014	14.972	83.119	0	102.619	0	0	0	0	0	0	0	0	0	0	0	300	0	0	0	0	0	0	0	0	0	0	0	0	0	0	0	0	0	0	0	0	0
38184	2	1	11.1616	530	17	1	2	3	11	35.6852	0.3505	0.14	16.875	42.385	0	95.4357	0	0	0	0	0	0	0	0	0	0	0	500	0	0	0	0	0	0	0	0	0	0	0	0	0	0	0	0	0	0	0	125	0
39029	2	1	8.92055	85	35	4	6	2	8	7.52811	0	12.327	25.907	0.279	0	46.0411	0	0	0	0	0	0	0	0	0	0	0	200	0	0	0	0	0	0	0	0	0	0	0	0	0	0	0	0	0	0	0	0	0
39049	2	1	9.06575	85	35	4	6	2	9	4.29	0.489	0	20.212	0	0	24.991	0	0	0	0	0	0	0	0	0	0	0	400	0	0	0	0	0	0	0	0	0	0	0	0	0	0	0	0	0	0	0	0	0
81218	2	2	7.65753	78	28	4	1	2	7	1.32556	0.1275	0.035	0	165.94	0	167.428	0	0	0	0	110	0	0	0	0	0	0	200	0	0	0	0	0	25	0	0	0	0	0	0	0	0	0	0	0	0	0	0	0
85004	2	2	7.1589	119	29	3	4	2	7	14.6919	0	0	11.1972	0.675	0	26.5641	0	0	0	0	0	0	0	0	0	0	0	465	0	0	0	0	0	0	0	0	0	0	0	0	0	0	0	0	0	0	0	0	0
85007	2	2	10.0055	119	29	3	4	3	10	15.409	0.23	0	50.5	0.93	0	67.069	200	0	0	0	0	0	0	0	0	0	0	200	0	0	0	0	0	0	0	0	0	0	0	0	0	0	0	0	0	0	0	0	0
88057	2	2	7.60822	84	46	4	5	2	7	6.4644	0	0	26.3612	34.284	0	67.1096	0	0	0	125	0	0	0	0	0	0	0	200	0	0	0	0	0	0	0	0	0	0	0	0	0	0	0	0	0	0	0	0	0
88098	2	1	6.79178	84	46	4	5	2	6	2.6544	0	35.02	11.1972	0	0	48.8716	0	0	0	0	0	0	0	0	0	0	0	200	0	0	0	0	0	0	0	0	0	0	0	0	0	0	0	0	30	0	0	0	0
88100	2	1	8.69863	84	46	4	5	2	8	11.7485	0.913	0	28.0145	166.637	0	207.314	0	0	0	140	0	0	0	0	0	0	0	800	0	0	0	0	0	0	0	0	0	0	0	0	0	0	0	0	0	0	0	0	0
88107	2	1	6.87123	84	46	4	5	2	6	26.422	8.57255	0.084	29.7685	0.6975	0	65.5446	0	0	0	0	0	0	0	0	0	0	0	200	0	0	0	0	0	0	0	0	0	0	0	0	0	0	0	0	15	0	0	125	0
6017	3	1	16.5781	5	9	1	1	4	16	0.337	0.045	0	9.331	248.91	0	258.623	0	0	0	0	0	0	0	0	0	0	0	300	0	0	0	0	0	0	0	0	0	0	0	0	0	0	0	0	0	0	0	0	0
40019	3	1	14.474	132	25	3	6	4	14	0.8088	0	29.767	23.8669	0	0	54.4427	0	0	0	0	0	0	0	0	0	0	0	600	0	0	0	0	0	0	0	0	0	0	0	0	0	0	0	0	0	0	0	0	0
2084	3	1	17.663	62	33	2	3	4	17	23.6665	1.1405	0	17.245	0.915	0	42.967	0	0	0	200	0	0	0	0	0	0	0	0	0	0	0	0	0	0	0	0	0	0	0	0	0	0	0	0	0	0	0	0	0
25059	3	1	13.3726	120	41	2	4	3	13	7.002	0.3315	0	52.328	0	0	59.6615	0	0	0	0	0	0	0	0	0	0	0	450	0	0	0	0	0	0	0	0	0	0	0	0	30	0	0	0	0	0	0	0	0
33077	3	1	15.5315	79	8	4	2	4	15	56.625	0.0675	0	0	2.25	0	58.9425	0	0	0	0	0	0	0	0	0	0	0	0	0	0	0	0	0	0	0	0	0	0	0	0	0	0	0	0	0	0	0	0	0
2032	3	1	12.7562	62	33	2	3	3	12	10.724	0.0075	26.265	21.082	0	0	58.0785	0	0	0	140	0	0	0	0	0	0	0	600	0	0	0	0	0	0	0	0	0	0	0	0	0	0	0	0	0	0	0	0	0
2057	3	1	16.1863	502	33	1	3	4	16	49.98	0.015	0	0.12	0	0.5	50.615	0	0	0	0	0	0	0	0	0	0	0	300	0	0	0	0	0	0	0	0	0	0	0	0	0	0	0	0	0	0	0	250	0
2060	3	2	14.9397	62	33	2	3	4	14	14.364	0	0	9.61	103.713	0	127.686	0	0	0	0	0	0	0	0	0	0	0	0	0	0	0	0	0	0	0	0	0	0	0	10	0	0	0	0	0	0	0	0	0
2062	3	2	15.3151	62	33	2	3	4	15	24.095	0.285	0	0	167.065	0	191.445	0	0	0	0	0	0	0	0	0	0	0	0	0	0	0	0	0	0	0	0	0	0	0	0	0	0	0	0	0	0	0	0	0
3015	3	1	14.211	44	39	1	3	4	14	3.8375	0.475	0	13.6468	51.107	0	69.0662	0	0	0	0	0	60	0	0	0	0	0	250	0	0	0	0	0	0	0	0	0	0	0	0	0	0	0	0	0	0	0	0	0
3016	3	1	16.9068	44	39	1	3	4	16	10.2167	0.3295	0.056	38.645	38.232	0	87.4792	0	0	0	0	0	0	0	0	0	0	0	250	0	0	0	0	0	0	0	0	0	0	0	0	0	0	0	0	0	0	0	0	0
3037	3	2	14.4712	44	39	1	3	4	14	43.7397	0.08	0.056	13.454	1.8	0	59.1297	0	0	0	125	0	0	0	0	0	0	0	0	0	0	0	0	0	0	0	0	0	0	0	0	0	0	0	0	0	0	0	0	0
3039	3	1	14.3836	44	39	1	3	4	14	16.0745	0.0525	0	39.5185	1.1625	0	56.808	0	0	0	0	0	0	0	0	0	0	0	500	0	0	0	0	0	0	0	0	0	0	0	0	0	0	0	0	0	0	0	0	0
3040	3	2	12.7342	44	39	1	3	3	12	5.154	0.57	0	4.187	207.425	0	217.336	0	0	0	0	0	0	0	0	0	0	0	0	0	0	0	0	0	0	0	0	0	0	0	0	0	0	0	0	0	0	0	125	0
3056	3	1	12.5534	44	39	1	3	3	12	21.5954	0	0.112	45.556	1.395	0	68.6584	0	0	0	0	0	0	0	0	0	0	0	500	0	0	0	0	0	0	0	0	0	0	0	0	0	0	0	0	0	0	0	0	0
3064	3	1	13	73	39	3	3	3	13	13.2028	0.078	14.036	22.778	0.6975	0	50.7923	0	0	0	0	0	0	0	0	0	0	0	250	0	0	0	0	0	0	0	0	0	0	0	0	30	0	20	0	0	0	0	0	0
3066	3	2	13.5041	73	39	3	3	3	13	31.575	0.075	0	29.622	1.35	0	62.622	0	0	0	0	0	0	0	0	0	0	0	250	0	0	0	0	0	0	0	0	0	0	0	0	0	0	0	0	0	0	0	0	0
3067	3	2	12.8932	73	39	3	3	3	12	38.3445	0.475	0	11.916	1.575	0	52.3105	0	0	0	0	0	0	0	0	0	0	0	250	0	0	0	0	0	0	0	0	0	0	0	0	0	0	25	0	0	0	0	0	0
3079	3	1	17.5123	73	39	3	3	4	17	3.991	0.5925	0	12.433	165.94	0	182.957	0	0	0	0	0	0	0	0	0	0	500	0	0	0	0	0	0	0	0	0	0	0	0	0	0	0	0	0	0	0	0	0	0
3090	3	2	13.1315	73	39	3	3	3	13	40.1385	0	0	40.4075	0.93	0.25	81.726	0	0	0	125	0	0	0	0	0	250	0	0	0	0	0	0	0	0	0	0	0	0	0	0	0	0	0	0	0	0	0	0	0
3104	3	1	14.4082	73	39	3	3	4	14	4.5	0.0975	61.285	0	0	0	65.8825	0	0	0	0	0	0	0	0	0	0	0	0	0	0	0	0	0	0	0	0	0	0	0	0	0	0	0	0	0	0	0	0	0
3151	3	2	13.5644	73	39	3	3	3	13	4.5	0.0975	0	0	165.94	0	170.537	0	0	0	0	0	0	0	0	0	0	0	250	0	0	0	0	0	0	0	0	0	0	0	0	0	0	0	0	0	0	0	0	0
3159	3	2	13.2466	44	39	1	3	3	13	57.7625	0	0	18.734	1.125	0.3	77.9215	0	0	0	0	0	0	0	0	0	0	0	500	0	0	0	0	0	0	0	0	0	0	0	0	0	0	0	0	0	0	0	0	0
3310	3	2	16.0438	117	39	1	3	4	16	19.501	0	0	39.465	1.395	0	60.361	0	0	0	0	0	0	0	0	0	0	0	0	0	0	0	0	0	0	0	0	0	0	0	0	0	0	0	0	0	0	0	0	0
4010	3	2	14.126	422	39	1	3	4	14	3	0.03	0	0	165.94	0	168.97	0	0	0	0	0	0	0	0	0	0	0	0	0	0	0	0	0	0	0	0	0	0	0	0	0	0	0	0	0	0	0	0	0
4011	3	2	13.7808	420	39	3	3	3	13	30.9318	0.03	0	35.1277	0.81375	0	66.9032	0	0	0	0	0	0	0	0	0	200	0	0	0	0	0	0	0	0	0	0	0	0	0	0	0	40	0	0	0	0	0	0	0
4012	3	1	15.4822	423	39	1	3	4	15	36.3975	0.833	0.084	18.6626	1.374	0	57.3511	0	0	0	0	0	0	0	0	0	200	0	0	0	0	0	0	0	0	0	0	0	0	0	0	0	0	0	0	0	0	0	0	0
4017	3	1	13.5808	420	39	3	3	3	13	21.1172	0.586	0.14	49.559	0.465	0	71.8672	0	0	0	0	0	250	0	0	0	0	0	400	0	0	0	0	0	0	0	0	0	0	0	0	0	0	0	0	0	0	0	0	0
4018	3	1	14.2548	420	39	3	3	4	14	0.674	0	0	18.662	165.94	0	185.276	0	0	0	0	0	0	0	0	0	0	0	200	0	0	0	0	0	0	0	0	0	0	0	0	0	0	0	0	20	0	0	0	0
4030	3	2	15	427	39	1	3	4	15	35.8074	0.94	0.112	18.662	1.35	0	56.8714	0	0	0	100	0	0	0	0	0	0	0	200	0	0	0	0	0	0	0	0	0	0	0	0	0	0	0	0	0	0	0	0	0
4062	3	1	13.4904	420	39	3	3	3	13	3.674	0.03	0	18.662	165.94	0	188.306	0	0	0	0	0	0	0	0	0	0	200	30	0	0	0	0	0	0	0	0	0	0	0	0	0	0	50	0	0	0	0	0	0
5008	3	1	12.9425	83	48	4	3	3	12	48.496	0.03	0	5.194	0	0.14	53.86	0	0	0	0	0	0	0	0	0	0	0	200	0	0	0	0	0	0	0	0	0	0	0	0	0	0	0	0	0	0	0	0	0
5018	3	1	12.1808	83	48	4	3	3	12	56.006	0	0	33.516	0.372	0.14	90.034	0	0	0	0	0	0	0	0	0	0	0	200	0	0	0	0	0	0	0	0	0	0	0	0	0	0	0	0	0	0	0	0	0
5043	3	1	14.8932	83	48	4	3	4	14	6.222	0.21316	0	28.83	0	0	35.2652	0	0	0	0	0	0	0	0	0	0	0	200	0	0	0	0	0	0	0	0	0	0	0	0	0	0	0	0	0	0	0	0	0
5055	3	1	14.3178	83	48	4	3	4	14	13.69	0.7175	0	40.944	0.93	0	56.2815	0	0	0	0	0	0	0	0	0	0	0	525	0	0	0	0	0	0	0	0	0	0	0	0	0	0	0	0	0	0	0	125	0
5060	3	1	15.3781	83	48	4	3	4	15	5.511	0.0375	0	27.993	124.455	0	157.996	0	0	0	0	0	0	0	0	0	0	0	375	0	0	0	0	0	0	0	0	0	0	0	0	0	0	0	0	40	0	0	0	0
5070	3	2	16.5315	83	48	4	3	4	16	11.629	0.37	0	48.312	0.6975	0	61.0085	0	0	0	0	0	0	0	0	0	175	0	0	0	0	0	0	0	0	0	0	0	0	0	0	0	0	0	0	0	0	0	0	0
5224	3	1	14.3397	515	20	2	3	4	14	4.754	0.8685	0	0.002	166.02	0	171.644	0	0	0	0	0	0	0	0	0	0	0	300	0	0	0	0	0	0	0	0	0	0	0	0	0	0	0	0	0	0	0	0	0
5266	3	1	17.7151	510	20	3	3	4	17	16.7572	0.2225	0.14	37.288	0	0	54.4077	0	0	0	0	0	0	0	0	0	0	0	600	0	0	0	0	0	120	0	0	0	0	0	0	0	0	0	0	0	0	0	0	0
7037	3	1	17.0247	75	1	3	3	4	17	3.75	0.015	0	57.66	0	0	61.425	0	0	0	0	0	0	0	0	0	0	0	100	0	0	0	0	0	0	0	0	0	0	0	0	0	0	0	0	60	0	0	0	0
8007	3	2	17.1123	416	28	1	1	4	17	49.5925	0.19	14.8835	4.6655	0	0	69.3315	0	0	0	0	0	0	0	0	0	150	0	0	0	0	0	0	0	0	0	0	0	0	0	0	0	0	0	0	0	0	0	0	0
11023	3	1	17.6192	69	47	3	1	4	17	46.542	0.02283	0	20.1945	0	0.25	67.0093	0	0	0	0	0	0	0	0	0	0	500	0	0	0	0	0	0	0	0	0	0	0	0	0	0	0	0	0	0	0	0	0	0
11042	3	1	12.1699	69	47	3	1	3	12	3.83263	0.2285	0.203	23.9785	145.197	0	173.44	0	0	0	0	0	0	0	0	0	0	0	300	0	0	0	0	0	0	0	0	0	0	0	0	0	0	0	0	0	0	0	0	0
11060	3	2	16.3178	69	47	3	1	4	16	18.776	0.46094	0	28.781	0.492	0	48.5099	0	0	0	0	0	0	0	0	0	0	0	717	0	0	0	0	0	0	0	0	0	0	0	0	0	0	0	0	20	0	0	0	0
11068	3	1	12.3616	69	47	3	1	3	12	30.618	0.155	0	30.961	0	0.08	61.814	0	0	0	0	0	0	0	0	0	0	0	600	0	0	0	0	0	0	0	0	0	0	0	0	0	0	0	0	0	0	0	250	0
11078	3	2	17.5671	69	47	3	1	4	17	0	0	0	0	0	0	0	0	0	0	0	0	0	0	0	0	0	0	0	0	0	0	0	0	0	0	0	0	0	0	0	0	0	0	0	0	0	0	0	0
11088	3	2	14.6082	69	47	3	1	4	14	0.9795	0.0785	0	60.0895	0.1845	0	61.332	0	0	0	0	0	0	0	0	0	0	0	200	0	0	0	0	0	0	0	0	0	0	0	0	80	0	0	0	0	0	0	0	0
11104	3	2	15.0055	69	47	3	1	4	15	1.011	0.0525	0	29.4655	0	0	30.529	0	0	0	0	0	0	0	0	0	0	0	450	0	0	0	0	0	0	0	0	0	0	0	0	0	0	0	0	0	0	0	0	0
11114	3	1	14.3726	69	47	3	1	4	14	9.93525	0.971	0	38.5823	0.62775	0	50.1163	0	0	0	0	0	0	0	0	0	0	450	0	0	0	0	0	0	0	0	0	0	0	0	0	0	0	0	0	40	0	0	0	0
13059	3	1	12.5288	101	2	1	1	3	12	1.199	0.153	0	18.662	0	0	20.014	0	0	0	0	0	0	0	0	0	0	400	0	0	0	0	0	0	0	0	0	0	0	0	0	0	0	0	0	0	0	0	0	0
13063	3	1	13.8685	101	2	1	1	3	13	17.9	0.459	0	24.298	166.87	0	209.527	0	0	0	0	0	0	20	0	0	0	0	0	0	0	0	0	0	0	0	0	0	0	0	0	0	0	0	0	0	0	0	0	0
13068	3	2	14.4603	101	2	1	1	4	14	2.82127	0.153	4.642	0	0	0	7.61627	0	0	0	0	0	0	0	0	0	0	0	0	0	0	0	0	0	0	0	0	0	0	0	0	60	0	0	0	0	0	0	0	0
14020	3	2	13.4904	137	13	2	1	3	13	5.44911	0.03	0.162	44.779	0.016	0	50.4361	0	0	0	0	0	0	0	0	0	400	0	0	0	0	0	0	0	0	0	0	0	0	0	0	0	0	0	0	30	0	0	0	0
14029	3	2	15.8849	134	13	2	1	4	15	3.31946	1.65	0.098	43.0745	0	0	48.142	0	0	0	0	0	0	0	0	0	0	0	830	0	0	0	0	0	0	0	0	0	0	0	0	0	0	0	0	0	0	0	0	0
14087	3	1	14.4521	67	13	3	1	4	14	3.52669	0.2024	10.562	49.086	0	0	63.3771	0	0	0	0	0	0	0	0	0	0	0	450	0	0	0	0	0	0	0	0	0	0	0	0	0	0	0	0	0	0	0	0	0
14091	3	1	14.0466	134	13	2	1	4	14	1.348	0	0	52.7	0	0	54.048	0	0	0	0	0	0	0	0	0	0	0	660	0	0	0	0	0	0	0	0	0	0	0	0	0	0	0	0	0	0	0	0	0
15024	3	2	14.0329	208	13	2	1	4	14	8.058	28.9	0.042	45.712	0	0	82.712	0	0	0	0	0	0	0	0	0	0	0	0	0	0	0	0	0	0	0	0	0	0	0	0	0	0	0	0	15	0	0	0	0
15026	3	2	17.063	67	13	3	1	4	17	17.3287	2.35566	0.14	56.4455	0.6975	0	76.9674	0	0	0	0	0	0	0	0	0	0	0	250	0	0	0	0	0	0	0	0	0	0	0	0	0	0	0	0	0	0	0	0	0
15028	3	2	17.2767	215	13	1	1	4	17	4.19854	0.3425	0.084	18.662	165.94	0	189.227	0	0	0	0	0	0	0	0	0	0	0	250	0	0	0	0	0	0	0	0	0	0	0	0	0	0	0	0	0	0	0	0	0
15030	3	2	15.6712	212	13	1	1	4	15	2.848	0.03	0.1	40.064	165.94	0	208.982	0	0	0	0	0	0	0	0	0	0	625	0	0	0	0	0	0	0	0	0	0	0	0	0	0	0	0	0	0	0	0	0	0
15033	3	2	16.1781	206	13	1	1	4	16	14.19	0.015	44.82	24.15	0.93	0	84.105	0	0	0	0	0	0	0	0	0	0	0	200	0	0	0	0	0	0	0	0	0	0	0	0	0	0	0	0	0	0	0	0	0
16007	3	1	12.6082	53	6	2	1	3	12	7.173	0.1134	0	55.0206	0	0	62.307	0	0	0	0	0	0	0	0	0	0	0	200	0	0	0	0	0	0	0	0	0	0	0	0	0	0	0	0	0	0	0	0	0
16009	3	1	13.7726	53	6	2	1	3	13	0.4044	0.018	0	11.1972	149.346	0	160.966	0	0	0	0	0	0	0	0	0	0	0	200	0	0	0	0	0	0	0	0	0	0	0	0	0	0	0	0	0	0	0	0	0
16012	3	1	12.6384	53	6	2	1	3	12	0	0.009	0	0	0	0	0.009	0	0	0	0	0	0	0	0	0	210	0	0	0	0	0	0	0	0	0	0	0	0	0	0	0	0	0	0	0	0	0	0	0
17012	3	1	12.5123	54	13	2	1	3	12	0.71693	0.0225	80.816	7.0711	0	0	88.6265	300	0	0	0	0	0	0	0	0	0	0	0	0	0	0	0	0	0	0	0	0	0	0	0	0	0	0	0	0	0	0	0	0
17017	3	1	15.6877	54	13	2	1	4	15	15.0536	0.015	19.261	25.0834	0.53475	0	59.9479	0	0	0	0	0	0	0	0	0	0	0	400	0	0	0	0	0	0	0	0	0	0	0	0	30	0	0	0	0	0	0	0	0
17076	3	1	16.0055	54	13	2	1	4	16	24.7325	0.082	19.261	40.5739	1.5505	0	86.1999	0	0	0	0	0	0	0	0	0	0	0	0	0	0	0	0	0	0	0	0	0	0	0	0	0	0	0	0	0	0	0	0	0
21044	3	1	14.6548	234	41	2	4	4	14	3.89238	0.35	0.112	11.191	165.94	0	181.485	0	0	0	0	0	0	0	0	0	0	0	400	0	0	0	0	0	0	0	0	0	0	0	0	0	0	0	0	0	0	0	0	0
21071	3	2	17.6575	81	41	4	4	4	17	14.6457	0.015	38.522	22.3388	0.86025	0	76.3817	0	20	0	0	0	0	0	0	0	0	0	0	0	0	0	0	0	0	0	0	0	0	0	0	0	0	0	0	0	0	0	0	0
21076	3	2	15.1151	234	41	2	4	4	15	1.6685	0	35.02	4.6655	0	0	41.354	0	0	0	0	0	0	0	0	0	0	200	0	0	0	0	0	0	0	0	0	0	0	0	0	0	0	0	0	0	0	0	0	0
22067	3	2	12.9315	105	4	2	4	3	12	10.072	0	0	19.32	208.169	0	237.561	0	0	0	0	0	0	0	0	0	0	0	0	0	0	0	0	0	0	0	0	0	0	0	0	0	0	0	0	0	0	0	0	0
22068	3	2	12.6658	104	4	1	4	3	12	4.3665	0.38	0	84.6215	0	0	89.368	0	0	0	0	0	0	0	0	0	0	0	1200	0	0	0	0	0	0	0	0	0	0	0	0	0	0	0	0	0	0	0	0	0
22074	3	2	17.3507	104	4	1	4	4	17	23.4034	0.447	0.112	8.657	0.94	0	33.5594	0	0	0	125	0	0	0	0	0	0	0	250	0	0	0	0	0	0	0	0	0	0	0	0	0	0	0	0	40	0	0	0	0
22084	3	2	16.3562	104	4	1	4	4	16	4.3525	0	0	23.3275	207.425	0	235.105	0	0	0	0	0	0	0	0	0	0	0	500	0	0	0	0	0	0	0	0	0	0	0	0	0	0	0	0	25	0	0	0	0
24071	3	2	15.3781	528	23	2	4	4	15	1.011	0	29.767	27.993	0	0	58.771	0	0	0	0	0	0	0	0	0	0	0	200	0	0	0	0	0	0	0	0	0	0	0	0	0	0	0	0	0	0	0	0	0
24079	3	1	14.7068	528	23	2	4	4	14	9.19858	1.1235	29.816	3.102	165.94	0	209.18	0	0	0	0	0	0	0	0	0	0	0	200	0	0	0	0	0	0	0	0	0	0	0	0	0	0	0	0	30	0	0	0	0
25023	3	2	14.5726	120	41	2	4	4	14	4.43315	0.015	0.051	29.211	0.004	0	33.7141	0	0	0	0	0	0	0	0	0	0	0	200	0	0	0	0	0	0	0	0	0	0	0	0	0	0	0	0	0	0	0	0	0
25040	3	1	13.8575	120	41	2	4	3	13	5.35611	0.339	0.07	0	0	0	5.76511	0	0	0	0	0	0	0	0	0	0	0	200	0	0	0	0	0	0	0	0	0	0	0	0	0	0	0	0	0	0	0	0	0
25071	3	1	17.4822	120	41	2	4	4	17	2.763	0	0.125	15.229	0	0	18.117	0	0	0	0	0	0	0	0	0	0	0	250	0	0	0	0	0	0	0	0	0	0	0	0	0	0	0	0	0	0	0	0	0
26007	3	2	15.9781	28	7	1	2	4	15	4.599	0.015	0	28.898	18.025	0	51.537	0	0	0	0	0	0	0	0	0	0	0	200	0	0	0	0	0	0	0	0	0	0	0	0	0	0	0	0	0	0	0	0	0
26048	3	2	17.2301	55	7	2	2	4	17	0	0	0	15.376	165.94	0	181.316	0	0	0	0	0	125	0	0	0	0	0	0	400	0	0	0	0	0	0	0	0	0	0	30	0	0	0	0	0	0	0	0	0
27013	3	2	16.9014	56	8	2	2	4	16	58.5636	0.9333	0.06	2.1816	0	0	61.7385	0	0	0	0	0	0	0	0	0	200	0	100	0	0	0	0	0	0	0	0	0	0	0	0	0	0	0	0	0	0	0	0	0
27045	3	1	17.8356	56	8	2	2	4	17	0.1	0.0045	0	12.511	145.197	0	157.813	0	0	0	0	0	0	0	0	0	0	0	275	0	0	0	0	0	0	0	0	0	0	0	0	0	0	0	0	0	0	0	0	0
28020	3	1	16.6712	57	8	2	2	4	16	5.91131	0.2415	0.308	10.728	43.26	0	60.4488	0	0	0	0	0	0	0	0	0	0	0	0	0	0	0	0	0	0	0	0	0	0	0	25	0	0	0	0	0	0	0	125	0
28038	3	2	15.7014	57	8	2	2	4	15	45.2721	0.28544	0.112	28.6537	0.86025	0	75.1836	0	0	0	0	0	0	0	0	0	0	0	0	0	0	0	0	0	0	0	0	0	0	0	0	0	0	0	0	0	0	0	0	0
28073	3	1	17.5781	71	8	3	2	4	17	20.053	0.0825	0	4.805	165.94	0	190.881	100	0	0	0	0	0	0	0	0	0	0	0	0	0	0	0	0	0	0	0	0	0	0	0	0	0	0	0	0	0	0	0	0
29001	3	1	13.1726	58	8	2	2	3	13	16.6582	1.256	0	29.8768	0.62775	0	48.4188	0	0	0	125	0	0	0	0	0	0	0	225	0	0	0	0	0	0	0	0	0	0	0	0	25	0	0	0	0	0	0	0	0
29023	3	1	17.3233	58	8	2	2	4	17	27.2775	1.4625	0	20.807	22.755	0	72.302	0	0	0	0	0	0	0	0	0	0	0	250	0	0	0	0	0	0	0	0	0	0	0	0	0	0	0	0	0	0	0	125	0
29028	3	1	17.3562	58	8	2	2	4	17	0.337	0.015	29.767	9.331	165.94	0	205.39	0	0	0	0	0	120	0	0	0	0	0	300	0	0	0	0	0	0	0	0	0	0	0	0	0	0	0	0	0	0	0	0	0
30045	3	2	12.8685	23	43	1	2	3	12	1.5	0.2295	0	0	165.94	0	167.669	0	0	0	0	0	0	0	0	0	0	0	0	0	0	0	0	0	0	0	0	0	0	0	0	0	0	0	0	0	0	0	0	0
30098	3	1	16.5781	25	43	1	2	4	16	4.5535	3.5465	0	46.3455	0	0	54.4455	0	0	0	0	0	0	0	0	0	0	0	250	0	0	0	0	0	0	0	0	0	0	0	0	0	0	0	0	0	0	0	0	0
31039	3	1	15.5096	86	8	2	2	4	15	25.7458	0.03	0	27.1788	0.86025	0	53.8147	0	0	0	0	0	0	0	0	0	0	0	0	0	0	0	0	0	0	0	0	0	0	0	0	0	0	0	0	0	0	0	125	0
33018	3	1	15.074	79	8	4	2	4	15	8.00298	0.327	19.373	22.7245	0.048	0	50.4755	0	0	0	0	0	0	0	0	0	450	0	0	0	0	0	0	0	0	0	0	0	0	0	0	0	0	0	0	0	0	0	0	0
33019	3	2	15.189	79	8	4	2	4	15	1.40969	0.0375	44.7065	38.4772	0	0	84.6309	0	0	0	0	0	0	0	0	0	450	0	0	0	0	0	0	0	0	0	0	0	0	0	0	0	0	0	0	0	0	0	0	0
33022	3	2	13.5644	79	8	4	2	3	13	20.8827	0.015	0.336	9.2656	0.675	0	31.1743	0	0	0	0	0	0	0	0	0	110	0	0	0	0	0	0	0	0	0	0	0	0	0	0	0	0	0	0	0	0	0	0	0
33037	3	2	16.0493	79	8	4	2	4	16	23.2008	0.504	0.372	6.3775	166.131	0	196.585	0	0	0	100	0	0	0	0	0	200	0	0	0	0	0	0	0	0	0	0	0	0	0	0	0	0	0	0	0	0	0	0	0
33062	3	2	14.2795	79	8	4	2	4	14	5.077	0.6775	0	6.39625	51.107	0	63.2578	200	0	0	0	0	0	0	0	0	0	0	0	0	0	0	0	0	0	0	0	0	0	0	0	0	0	0	0	0	0	0	0	0
33065	3	1	14.9068	79	8	4	2	4	14	1.58068	29.944	0.168	26.1268	0	0	57.8195	0	0	0	0	0	0	0	0	0	1000	0	0	0	0	0	0	0	0	0	0	0	0	0	0	0	0	0	0	0	0	0	0	0
33174	3	1	17.1589	79	8	4	2	4	17	6.65811	1.9025	0.07	19.0755	165.94	0	193.646	0	0	0	0	0	0	0	0	0	0	0	200	0	0	0	0	0	0	0	0	0	0	0	0	0	0	0	0	0	0	0	0	0
34051	3	1	15.0658	80	50	4	2	4	15	2.2712	0.062	0	58.5776	0	0	60.9108	0	0	0	0	0	0	0	0	0	0	0	800	0	0	0	0	0	0	0	0	0	0	0	0	0	0	0	0	0	0	0	0	0
34055	3	1	13.6438	80	50	4	2	3	13	1.9185	0	13.446	5.22	0.1395	0	20.724	0	0	0	0	0	0	20	0	0	240	0	0	0	0	0	0	0	0	0	0	0	0	0	0	0	60	0	0	0	0	0	0	0
34090	3	2	16.4932	80	50	4	2	4	16	8.551	1.9495	0	24.39	165.94	0	200.831	200	0	0	0	0	0	0	0	0	300	0	0	0	0	0	0	0	20	0	0	0	0	0	0	0	0	0	0	0	0	0	0	0
34092	3	2	17.1041	80	50	4	2	4	17	30.9041	1.552	0.07	55.986	0	0	88.5121	0	0	0	0	0	0	0	0	0	0	0	400	0	0	0	0	0	0	0	0	0	0	0	0	0	0	0	0	0	0	0	0	0
35052	3	1	15.3452	70	8	3	2	4	15	14.0061	0.2205	0.07	14.415	165.94	0	194.652	0	0	0	0	0	0	0	0	0	0	0	200	0	0	0	0	0	0	0	0	0	0	0	0	40	0	0	0	0	0	0	0	0
36016	3	1	14.8466	84	46	4	5	4	14	3.598	0	0	37.324	0	0	40.922	0	0	0	0	0	0	0	0	0	0	0	400	0	0	0	0	0	0	0	0	0	0	30	0	0	0	0	0	0	0	0	0	0
37030	3	2	15.9014	122	3	3	5	4	15	0.5175	0.0225	0	9.331	165.94	0	175.811	0	0	0	0	0	0	0	0	0	0	0	400	0	0	0	0	0	0	0	0	0	0	0	0	0	30	0	0	0	0	0	125	0
37039	3	1	13.1863	413	3	1	5	3	13	15.0672	0.2	0	34.9633	0.62775	0	50.8582	0	0	0	0	0	0	0	0	0	0	0	450	0	0	0	0	0	0	0	0	0	0	0	0	0	0	0	0	0	0	0	0	0
38013	3	1	12.989	64	12	2	5	3	12	1.03591	0	67.3	22.3944	0	0	90.7303	0	0	0	0	0	0	0	0	0	0	0	400	0	0	0	0	0	0	0	0	0	0	0	0	50	0	0	0	0	0	0	0	0
38014	3	2	14.1589	64	12	2	5	4	14	1.7055	0.06	0	27.0765	0	0	28.842	0	0	0	0	0	0	0	0	0	0	0	400	0	0	0	0	0	0	0	0	0	0	0	0	0	0	0	0	0	0	0	0	250
[truncated: 1,263 more rows]
[truncated: 668 more columns]
